# Supplementary material for: Transcriptomic Maps of Colorectal Liver Metastasis: Machine Learning of Gene Activation Patterns and Epigenetic Trajectories in Support of Precision Medicine
Source: Cancers (Basel). 2023 Jul 28;15(15):3835. doi: 10.3390/cancers15153835 (PMC10417131; doi:10.3390/cancers15153835)
Supplement: Supplementary file 1 [file cancers-15-03835-s001.zip]

Archive with 5 entries (5 files):
- Movie_Tree-trajectory-Seg1-to-Seg3.mp4
- Suppl-Table-S2. Genes-in-Spots_overexpression_A-to-F.xlsx
- Suppl-Table-S3. GeneSetCollection_Livermets-CRCl.xlsx
- Suppl-Table-S4. max+min HR genes.xlsx
- Supplementary_Figures_and_Table_S1.pdf
