# Supplementary material for: Transcriptomic Maps of Colorectal Liver Metastasis: Machine Learning of Gene Activation Patterns and Epigenetic Trajectories in Support of Precision Medicine
Source: Cancers (Basel). 2023 Jul 28;15(15):3835. doi: 10.3390/cancers15153835 (PMC10417131; doi:10.3390/cancers15153835)
Supplement: Supplementary file 1 [file cancers-15-03835-s001.zip › Suppl-Table-S2. Genes-in-Spots_overexpression_A-to-F.xlsx]

## Sheet: SpotA
	Rank	ID	Symbol	mean expression	SD	max delta e	min delta e	correlation	->t.score	->p.value	Metagene	Chromosome	Description
TC04001282.hg	1	TC04001282.hg	PPBP	4.37519	1.55718	7.89684	-1.57386	0.496477	9.58755	0 .	1 x 1	4 q13	pro-platelet basic protein
TC01004511.hg	2	TC01004511.hg	CLCA4	3.09898	0.868401	6.15245	-0.574475	0.40151	7.3489	1.09179332241638e-12 .	2 x 1	1 p22	chloride channel accessory 4
TC03002788.hg	3	TC03002788.hg		5.72748	1.03245	6.09777	-1.34356	0.430482	7.99491	1.69864122767649e-14 .	2 x 1
TC01000823.hg	4	TC01000823.hg	CLCA4	2.79303	0.821138	6.07578	-0.478835	0.39047	7.10988	4.8132609009599e-12 .	2 x 1	1 p22	chloride channel accessory 4
TC08002413.hg	5	TC08002413.hg	CALB1	6.70557	1.19377	5.80292	-1.25331	0.655581	14.5533	0 .	1 x 1	8 q21	calbindin 1
TC10000890.hg	6	TC10000890.hg	DMBT1	6.9181	1.58463	5.80025	-1.80915	0.399773	7.31105	1.3837819778928e-12 .	1 x 1	10 q26	deleted in malignant brain tumors 1
TC07002248.hg	7	TC07002248.hg	NPSR1	6.19901	1.68132	5.57012	-1.79571	0.666087	14.9699	0 .	1 x 1	7 p14	neuropeptide S receptor 1
TC01003051.hg	8	TC01003051.hg	REG4	4.29316	1.19937	5.34745	-0.985682	0.550843	11.0637	0 .	1 x 1	1 p12	regenerating family member 4
TC01000748.hg	9	TC01000748.hg		2.37476	0.735122	5.30955	-0.81457	0.388775	7.07351	6.01541039202402e-12 .	1 x 2	1 p31	novel transcript
TC11002494.hg	10	TC11002494.hg	MUC2	6.49251	1.19338	5.2993	-1.24065	0.40677	7.46414	5.27911048209262e-13 .	1 x 1	CHR_HSCHR11_3_CTG1 p15	mucin 2, oligomeric mucus/gel-forming
TC01001720.hg	11	TC01001720.hg	CTSE	7.17407	1.55389	5.2394	-1.69385	0.602868	12.6666	0 .	1 x 1	1 q32	cathepsin E
TC07002495.hg	12	TC07002495.hg	MUC17	7.80007	2.58567	5.21631	-4.59238	0.536321	10.6519	0 .	1 x 1	7 q22	mucin 17, cell surface associated
TC13000295.hg	13	TC13000295.hg	SCEL	3.68059	1.22862	5.12576	-1.13443	0.629065	13.5653	0 .	1 x 1	13 q22	sciellin
TC07002496.hg	14	TC07002496.hg	MUC17	8.07658	2.61741	5.08653	-5.33802	0.536588	10.6594	0 .	1 x 1	7 q22	mucin 17, cell surface associated
TC11001837.hg	15	TC11001837.hg	TCN1	4.91468	1.36687	5.03651	-1.43423	0.52682	10.3898	0 .	1 x 1	11 q12	transcobalamin 1
TC11000039.hg	16	TC11000039.hg	MUC2	6.77539	1.06065	5.02205	-0.961853	0.399536	7.3059	1.4290790772975e-12 .	1 x 1	CHR_HSCHR11_3_CTG1 p15	mucin 2, oligomeric mucus/gel-forming
TC07000640.hg	17	TC07000640.hg	MUC17	6.44705	1.63578	4.94287	-1.79575	0.546954	10.952	0 .	1 x 1	7 q22	mucin 17, cell surface associated
TC17001904.hg	18	TC17001904.hg	ST6GALNAC1	6.13295	1.00058	4.71896	-1.52912	0.442109	8.26246	2.88657986402541e-15 .	1 x 2	17 q25	ST6 N-acetylgalactosaminide alpha-2,6-sialyltransferase 1
TC08001402.hg	19	TC08001402.hg		3.17925	0.769732	4.71267	-0.752436	0.461199	8.71309	1.11022302462516e-16 .	1 x 1
TC07000222.hg	20	TC07000222.hg	NPSR1	5.06272	1.26428	4.69938	-1.10905	0.665277	14.9372	0 .	1 x 1	7 p14	neuropeptide S receptor 1
TC08001401.hg	21	TC08001401.hg	CALB1	3.74256	0.873643	4.63411	-0.660166	0.604687	12.7268	0 .	1 x 1	8 q21	calbindin 1
TC18000127.hg	22	TC18000127.hg	DSG3	5.67794	1.50539	4.5836	-1.89084	0.519676	10.1963	0 .	1 x 1	18 q12	desmoglein 3
TC20000341.hg	23	TC20000341.hg	PI3	7.0551	1.20092	4.55861	-1.66279	0.542279	10.8192	0 .	1 x 1	20 q13	peptidase inhibitor 3
TC16001373.hg	24	TC16001373.hg	MSLN	6.63249	1.38723	4.54979	-2.21777	0.712825	17.0375	0 .	1 x 1	16 p13	mesothelin
TC19001764.hg	25	TC19001764.hg	KLK6	7.30028	0.989126	4.53205	-1.32534	0.561789	11.3834	0 .	2 x 1	19 q13	kallikrein related peptidase 6
TC19000279.hg	26	TC19000279.hg		7.20838	1.77031	4.41308	-2.67081	0.815165	23.5912	0 .	1 x 1	19 p13	urothelial cancer associated 1
TC19002012.hg	27	TC19002012.hg		7.12639	1.7458	4.3854	-2.51838	0.802103	22.5151	0 .	1 x 1	19 p13	urothelial cancer associated 1
TC01003768.hg	28	TC01003768.hg	PIGR	8.22684	2.05411	4.37114	-2.55001	0.371745	6.71265	5.27018428897463e-11 .	1 x 1	1 q32	polymeric immunoglobulin receptor
TC19001644.hg	29	TC19001644.hg		4.68087	1.25286	4.33376	-1.54642	0.579189	11.91	0 .	1 x 1	19 q13	IGFL2 antisense RNA 1
TC11002228.hg	30	TC11002228.hg	MMP7	7.54623	1.34183	4.30253	-2.68567	0.387433	7.04477	7.17048642684404e-12 .	1 x 1	11 q22	matrix metallopeptidase 7
TC10001967.hg	31	TC10001967.hg	C10orf126	3.37635	0.914904	4.3	-1.16815	0.583688	12.0501	0 .	1 x 1	10 p12	long intergenic non-protein coding RNA 1517
TC19002527.hg	32	TC19002527.hg		4.72087	1.24342	4.29232	-1.50487	0.576486	11.8267	0 .	1 x 1	19 q13	IGFL2 antisense RNA 1
TC17002562.hg	33	TC17002562.hg	NOS2	5.9904	0.84879	4.2006	-1.61252	0.484327	9.27983	0 .	1 x 2	17 q11	nitric oxide synthase 2
TC04000381.hg	34	TC04000381.hg	FDCSP	5.09924	1.33077	4.16318	-1.88196	0.28932	5.06658	3.67484807917151e-07 .	2 x 1	4 q13	follicular dendritic cell secreted protein
TC04002655.hg	35	TC04002655.hg		5.14309	0.991606	4.1586	-0.958274	0.657103	14.6127	0 .	1 x 1	4 q24	novel transcript
TC19001765.hg	36	TC19001765.hg	KLK7	5.3488	0.865709	4.0399	-0.944201	0.599627	12.5601	0 .	2 x 1	19 q13	kallikrein related peptidase 7
TC04001438.hg	37	TC04001438.hg		5.56635	0.936142	4.0277	-0.963406	0.649094	14.3035	0 .	1 x 1	4 q24	novel transcript
TC12001523.hg	38	TC12001523.hg	KRT6B	6.19281	0.907432	4.0165	-1.24048	0.500472	9.69034	0 .	2 x 1	12 q13	keratin 6B
TC03003290.hg	39	TC03003290.hg	MUC4	9.43009	2.01281	3.96506	-3.82568	0.679708	15.5341	0 .	1 x 1	3 q29	mucin 4, cell surface associated
TC03003289.hg	40	TC03003289.hg	MUC4	9.43484	1.76306	3.90133	-3.29655	0.681483	15.6098	0 .	1 x 1	CHR_HSCHR3_1_CTG3 q29	mucin 4, cell surface associated
TC13000716.hg	41	TC13000716.hg		7.47023	1.0231	3.88595	-1.45263	0.707261	16.7703	0 .	1 x 1
TC15000456.hg	42	TC15000456.hg	GCNT3	6.74303	1.37685	3.86398	-2.16854	0.833524	25.2902	0 .	1 x 1	15 q22	glucosaminyl (N-acetyl) transferase 3, mucin type
TC18000716.hg	43	TC18000716.hg	RAB27B	4.38663	0.834772	3.82886	-1.82982	0.557791	11.2656	0 .	1 x 1	18 q21	RAB27B, member RAS oncogene family
TC18000189.hg	44	TC18000189.hg	RAB27B	5.72071	0.815234	3.79499	-1.43663	0.601534	12.6226	0 .	1 x 1	18 q21	RAB27B, member RAS oncogene family
TC07002497.hg	45	TC07002497.hg	MUC17	6.44625	1.03942	3.77767	-1.45394	0.545744	10.9175	0 .	1 x 1	7 q22	mucin 17, cell surface associated
TC04001216.hg	46	TC04001216.hg	NMU	3.85541	0.74371	3.75721	-0.982995	0.635463	13.796	0 .	1 x 1	4 q12	neuromedin U
TC13001558.hg	47	TC13001558.hg		7.54981	0.955591	3.75405	-1.27782	0.727705	17.785	0 .	1 x 1
TC19001767.hg	48	TC19001767.hg	KLK10	6.82649	0.796854	3.72555	-1.08609	0.729767	17.8926	0 .	1 x 1	19 q13	kallikrein related peptidase 10
TC06003665.hg	49	TC06003665.hg	CLIC5	4.96049	1.12608	3.63939	-2.13285	0.597321	12.4849	0 .	1 x 1	6 p21	chloride intracellular channel 5
TC21000486.hg	50	TC21000486.hg	TFF1	8.20341	1.30728	3.59059	-1.95478	0.408136	7.49418	4.36317648677687e-13 .	1 x 1	21 q22	trefoil factor 1
TC07002249.hg	51	TC07002249.hg		4.26738	1.04022	3.53466	-1.63879	0.629231	13.5713	0 .	1 x 1
TC17002547.hg	52	TC17002547.hg	KRT17	8.26474	0.891136	3.51174	-1.69561	0.561557	11.3766	0 .	1 x 1	17 p11	keratin 17 pseudogene 2
TC15000351.hg	53	TC15000351.hg	DUOXA2	5.99532	0.837297	3.49649	-1.08359	0.572748	11.7124	0 .	1 x 1	15 q21	dual oxidase maturation factor 2
TC15001305.hg	54	TC15001305.hg	DUOX2	6.81669	1.01489	3.44742	-1.18829	0.61874	13.2027	0 .	1 x 1	15 q21	dual oxidase 2
TC07001194.hg	55	TC07001194.hg	IGF2BP3	4.78643	0.887549	3.36625	-0.978284	0.408265	7.49703	4.28435065202848e-13 .	2 x 1	7 p15	insulin like growth factor 2 mRNA binding protein 3
TC09002865.hg	56	TC09002865.hg	CLIC3	6.46047	0.701206	3.33505	-1.08268	0.634024	13.7437	0 .	2 x 1	9 q34	chloride intracellular channel 3
TC17002894.hg	57	TC17002894.hg	NOS2	6.11636	0.609994	3.32246	-0.794842	0.491552	9.46193	0 .	1 x 2	17 q11	nitric oxide synthase 2
TC01005047.hg	58	TC01005047.hg		6.25988	1.01301	3.31683	-1.43357	0.774196	20.5039	0 .	1 x 1	1 q41	long intergenic non-protein coding RNA 2474
TC09000330.hg	59	TC09000330.hg	GDA	6.795	0.90447	3.30813	-2.3438	0.526435	10.3793	0 .	1 x 1	9 q21	guanine deaminase
TC12002771.hg	60	TC12002771.hg		6.82375	1.2895	3.29559	-2.73335	0.730885	17.9514	0 .	1 x 1	12 p13	long intergenic non-protein coding RNA 1559
TC13001054.hg	61	TC13001054.hg		5.72557	0.88781	3.27396	-1.71287	0.371773	6.71324	5.2519100179893e-11 .	1 x 2	13 q14	SMIM2 antisense RNA 1
TC04001344.hg	62	TC04001344.hg	PLAC8	6.16127	0.883973	3.25575	-1.4217	0.610847	12.933	0 .	1 x 1	4 q21	placenta associated 8
TC01001929.hg	63	TC01001929.hg		2.58519	0.886454	3.2453	-1.35035	0.53595	10.6416	0 .	1 x 1	1 q42	microRNA 4427
TC18000226.hg	64	TC18000226.hg	SERPINB5	6.54693	1.47599	3.23628	-2.72838	0.716248	17.2051	0 .	1 x 1	18 q21	serpin family B member 5
TC13000163.hg	65	TC13000163.hg		5.0521	0.951354	3.23282	-1.81548	0.391258	7.12682	4.33764135721049e-12 .	1 x 2	13 q14	SMIM2 antisense RNA 1
TC04002090.hg	66	TC04002090.hg		5.71043	0.876262	3.19449	-1.33882	0.591441	12.2954	0 .	1 x 1
TC13001676.hg	67	TC13001676.hg		3.74995	0.838883	3.17109	-1.1071	0.599644	12.5606	0 .	1 x 1
TC01001825.hg	68	TC01001825.hg		6.25928	0.947722	3.14219	-1.36383	0.770796	20.2814	0 .	1 x 1	1 q41	long intergenic non-protein coding RNA 2474
TC11003415.hg	69	TC11003415.hg		9.03423	1.26704	3.12223	-1.98529	0.763548	19.8209	0 .	1 x 1
TC02001556.hg	70	TC02001556.hg	MBOAT2	6.42676	0.764628	3.11057	-1.95244	0.499652	9.66917	0 .	1 x 1	2 p25	membrane bound O-acyltransferase domain containing 2
TC01006056.hg	71	TC01006056.hg	LEMD1	4.21089	0.999317	3.0141	-1.44046	0.516129	10.1013	0 .	1 x 1	1 q32	LEM domain containing 1
TC02001601.hg	72	TC02001601.hg		7.07741	0.912766	2.98178	-1.73777	0.766996	20.0376	0 .	1 x 1
TC11002453.hg	73	TC11002453.hg		8.48886	1.24118	2.97124	-2.20653	0.801264	22.4493	0 .	1 x 1
TC20000876.hg	74	TC20000876.hg	SLPI	7.80997	1.09612	2.96263	-2.48125	0.673301	15.2651	0 .	1 x 1	20 q13	secretory leukocyte peptidase inhibitor
TC04002853.hg	75	TC04002853.hg		8.28029	1.24238	2.9561	-1.96983	0.83798	25.7414	0 .	1 x 1
TC04002789.hg	76	TC04002789.hg		8.00422	1.02512	2.93315	-1.63862	0.775901	20.6172	0 .	1 x 1
TC06001729.hg	77	TC06001729.hg	C6orf132	7.03304	0.649064	2.93124	-1.64049	0.654555	14.5134	0 .	1 x 2	6 p21	chromosome 6 open reading frame 132
TC02000329.hg	78	TC02000329.hg		8.33713	1.17713	2.88592	-2.30807	0.820466	24.0574	0 .	1 x 1
TC03002078.hg	79	TC03002078.hg	LIPH	7.30396	1.28092	2.84289	-3.42497	0.762903	19.7809	0 .	1 x 1	3 q27	lipase H
TC12001262.hg	80	TC12001262.hg		6.64773	0.929502	2.83137	-1.78437	0.712961	17.0441	0 .	1 x 1	12 p13	long intergenic non-protein coding RNA 1559
TC06003649.hg	81	TC06003649.hg	C6orf132	7.6751	0.649717	2.77291	-1.43112	0.631972	13.6696	0 .	1 x 2	6 p21	chromosome 6 open reading frame 132
TC01005848.hg	82	TC01005848.hg	MUC1	7.16793	0.942503	2.77138	-1.66786	0.625288	13.4313	0 .	1 x 1	1 q22	mucin 1, cell surface associated
TC01001736.hg	83	TC01001736.hg	CD55	7.47282	0.587029	2.76266	-1.40732	0.626752	13.4831	0 .	2 x 1	1 q32	CD55 molecule (Cromer blood group)
TC12000663.hg	84	TC12000663.hg		6.03708	0.827654	2.7548	-1.34314	0.766091	19.9804	0 .	1 x 1	12 q21	novel transcript
TC03000878.hg	85	TC03000878.hg	ARL14	5.42353	0.80567	2.75212	-1.58059	0.605143	12.7419	0 .	1 x 1	3 q25	ADP ribosylation factor like GTPase 14
TC04002845.hg	86	TC04002845.hg		7.23492	0.943173	2.74602	-1.6381	0.814962	23.5736	0 .	1 x 1	4 q34	novel transcript
TC12002757.hg	87	TC12002757.hg		6.61086	0.999213	2.74481	-1.42088	0.779856	20.8844	0 .	1 x 1	12 p13	long intergenic non-protein coding RNA 2617
TC14001562.hg	88	TC14001562.hg	AHNAK2	7.43015	0.810219	2.68434	-1.57377	0.612623	12.9931	0 .	2 x 1	14 q32	AHNAK nucleoprotein 2
TC14002183.hg	89	TC14002183.hg	AHNAK2	7.79085	0.950291	2.66369	-2.01822	0.595768	12.4345	0 .	2 x 1	14 q32	AHNAK nucleoprotein 2
TC16001920.hg	90	TC16001920.hg		6.8814	1.0041	2.65765	-1.701	0.780993	20.9624	0 .	1 x 1
TC19002364.hg	91	TC19002364.hg		5.35472	0.718843	2.6446	-0.929599	0.701497	16.5002	0 .	1 x 1
TC01004863.hg	92	TC01004863.hg	QSOX1	6.57769	0.743772	2.63115	-1.78721	0.621023	13.2819	0 .	1 x 1	1 q25	quiescin sulfhydryl oxidase 1
TC10001637.hg	93	TC10001637.hg	COL17A1	7.16247	0.915402	2.55208	-1.4914	0.67785	15.4554	0 .	1 x 1	10 q25	collagen type XVII alpha 1 chain
TC04000408.hg	94	TC04000408.hg	CXCL8	7.32857	0.997631	2.53537	-2.58551	0.337936	6.01893	2.73391997929195e-09 .	2 x 1	4 q13	C-X-C motif chemokine ligand 8
TC18000882.hg	95	TC18000882.hg	DSC2	4.28657	0.803628	2.52989	-1.71303	0.465239	8.81039	0 .	1 x 1	18 q12	desmocollin 2
TC13001677.hg	96	TC13001677.hg		4.2181	0.697327	2.52314	-0.848454	0.655368	14.545	0 .	1 x 1
TC01006383.hg	97	TC01006383.hg	MUC1	7.35815	0.912367	2.52067	-1.61745	0.630673	13.6229	0 .	1 x 1	1 q22	mucin 1, cell surface associated
TC14001022.hg	98	TC14001022.hg	EGLN3	6.71796	0.74462	2.50155	-1.22954	0.415936	7.66704	1.4432899320127e-13 .	1 x 2	14 q13	egl-9 family hypoxia inducible factor 3
TC06004090.hg	99	TC06004090.hg	ADGRF4	5.10624	0.761807	2.49371	-1.2647	0.636672	13.8401	0 .	1 x 1	6 p12	adhesion G protein-coupled receptor F4
TC20000960.hg	100	TC20000960.hg	BCAS1	6.40971	0.660115	2.46353	-0.968315	0.570615	11.6477	0 .	2 x 1	20 q13	breast carcinoma amplified sequence 1
TC11002375.hg	101	TC11002375.hg	TRIM29	7.29649	0.770291	2.45403	-1.27471	0.712159	17.0052	0 .	1 x 1	11 q23	tripartite motif containing 29
TC12001220.hg	102	TC12001220.hg		6.14705	0.88515	2.43028	-1.24548	0.779454	20.8569	0 .	1 x 1	12 p13	long intergenic non-protein coding RNA 2617
TC08001232.hg	103	TC08001232.hg	SDR16C5	4.8148	0.800576	2.4246	-1.16431	0.478004	9.1225	0 .	1 x 1	8 q12	short chain dehydrogenase/reductase family 16C member 5
TC14000584.hg	104	TC14000584.hg	IFI27	9.26617	1.22885	2.41912	-3.724	0.496576	9.59007	0 .	1 x 1	CHR_HSCHR14_7_CTG1 q32	interferon alpha inducible protein 27
TC08000679.hg	105	TC08000679.hg		5.18259	0.755574	2.41659	-0.973906	0.760288	19.6198	0 .	1 x 1	8 q23	novel transcript
TC03002150.hg	106	TC03002150.hg	MUC4	6.19414	0.626168	2.40477	-0.89929	0.645339	14.1614	0 .	1 x 1	3 q29	mucin 4, cell surface associated
TC01001358.hg	107	TC01001358.hg		5.63022	0.721901	2.40183	-1.45832	0.601717	12.6286	0 .	1 x 2	1 q23	long intergenic non-protein coding RNA 1133
TC0Y000187.hg	108	TC0Y000187.hg		4.46168	0.729654	2.37852	-1.23362	0.786754	21.3658	0 .	1 x 1	Y q11	novel transcript
TC18000910.hg	109	TC18000910.hg		5.05312	0.779384	2.37821	-1.45322	0.800505	22.39	0 .	1 x 1
TC03001351.hg	110	TC03001351.hg	SLC6A20	6.86418	0.752831	2.37208	-1.26557	0.713859	17.0879	0 .	1 x 1	3 p21	solute carrier family 6 member 20
TC04000411.hg	111	TC04000411.hg	CXCL1	6.94677	0.72261	2.35647	-1.20826	0.422537	7.81492	5.52891066263328e-14 .	2 x 1	4 q13	C-X-C motif chemokine ligand 1
TC01003784.hg	112	TC01003784.hg	LAMB3	7.73043	0.664669	2.35113	-1.70239	0.604699	12.7272	0 .	1 x 2	1 q32	laminin subunit beta 3
TC19000458.hg	113	TC19000458.hg	FXYD3	7.7676	0.94417	2.33621	-1.8732	0.551268	11.0759	0 .	1 x 2	19 q13	novel protein
TC17001465.hg	114	TC17001465.hg	TNS4	7.66025	1.03666	2.33502	-1.93046	0.541077	10.7852	0 .	1 x 1	17 q21	tensin 4
TC01000580.hg	115	TC01000580.hg	TSPAN1	7.64832	1.02474	2.33253	-2.3821	0.768775	20.1511	0 .	1 x 1	1 p34	tetraspanin 1
TC14001821.hg	116	TC14001821.hg	IFI27	9.33331	1.22714	2.33222	-3.80568	0.491392	9.45788	0 .	1 x 1	CHR_HSCHR14_7_CTG1 q32	interferon alpha inducible protein 27
TC08002001.hg	117	TC08002001.hg	CA13	6.15671	0.662717	2.32924	-1.17729	0.578831	11.899	0 .	1 x 1	8 q21	carbonic anhydrase 13
TC06001768.hg	118	TC06001768.hg		6.24566	0.719219	2.30767	-1.27845	0.635869	13.8108	0 .	1 x 1
TC09000677.hg	119	TC09000677.hg	LCN2	7.13171	0.648792	2.30214	-1.09421	0.596363	12.4538	0 .	1 x 1	9 q34	lipocalin 2
TC14000242.hg	120	TC14000242.hg		6.43509	0.755714	2.28622	-1.10379	0.76638	19.9986	0 .	1 x 1	14 q21	novel transcript
TC01002578.hg	121	TC01002578.hg	SLC2A1	9.37364	1.03061	2.24367	-2.86968	0.543297	10.848	0 .	1 x 1	1 p34	solute carrier family 2 member 1
TC14000200.hg	122	TC14000200.hg		4.91964	0.628354	2.23414	-1.04635	0.601299	12.6149	0 .	1 x 1	14 q12	novel transcript, antisense to HEATR5A
TC21000730.hg	123	TC21000730.hg	B3GALT5	5.74295	0.684117	2.2086	-1.31195	0.612681	12.9951	0 .	2 x 1	21 q22	beta-1,3-galactosyltransferase 5
TC05001719.hg	124	TC05001719.hg		6.40869	0.696847	2.17424	-1.59026	0.577326	11.8525	0 .	1 x 1	5 q23	novel transcript
TC11000715.hg	125	TC11000715.hg		6.44321	0.659363	2.16917	-1.06395	0.609534	12.8887	0 .	1 x 1
TC07000796.hg	126	TC07000796.hg	AHCYL2	6.84465	0.635703	2.15326	-1.07902	0.53062	10.494	0 .	1 x 2	7 q32	adenosylhomocysteinase like 2
TC04001083.hg	127	TC04001083.hg		6.88926	0.677098	2.13494	-1.21879	0.725006	17.6456	0 .	1 x 1	4 p15	endogenous retrovirus group H member 1
TC16000400.hg	128	TC16000400.hg		7.57616	0.764033	2.11296	-1.49475	0.565835	11.5038	0 .	1 x 1	16 p11	solute carrier family 6 member 10, pseudogene
TC01003873.hg	129	TC01003873.hg	CAPN8	6.36215	0.81927	2.10437	-1.51454	0.540594	10.7716	0 .	1 x 1	1 q41	calpain 8
TC06000987.hg	130	TC06000987.hg		5.9213	0.709953	2.10327	-1.09331	0.809626	23.1227	0 .	1 x 1	6 q23	novel transcript
TC04000716.hg	131	TC04000716.hg		7.50599	0.988982	2.09833	-2.33651	0.820151	24.0292	0 .	1 x 1	4 q31	novel transcript
TC04002099.hg	132	TC04002099.hg		5.66505	0.68058	2.09199	-1.06738	0.789614	21.5715	0 .	1 x 1
TC04001759.hg	133	TC04001759.hg		7.73631	0.817968	2.08301	-1.36251	0.81941	23.9631	0 .	1 x 1	4 q34	novel transcript
TC05000450.hg	134	TC05000450.hg		5.88591	0.67008	2.08149	-0.962902	0.780781	20.9478	0 .	1 x 1	5 q14	novel transcript
TC12001901.hg	135	TC12001901.hg	NT5DC3	6.73033	0.651749	2.07835	-1.43501	0.529294	10.4576	0 .	1 x 1	12 q23	5'-nucleotidase domain containing 3
TC0X000754.hg	136	TC0X000754.hg	SLC6A8	8.39098	0.73569	2.05775	-1.32794	0.56768	11.5591	0 .	1 x 1	X q28	solute carrier family 6 member 8
TC19002457.hg	137	TC19002457.hg	DMKN	7.4064	0.701277	2.05235	-1.2508	0.509843	9.93474	0 .	2 x 1	19 q13	dermokine
TC01003270.hg	138	TC01003270.hg	S100A14	7.66682	0.728508	2.04985	-1.74711	0.718584	17.3209	0 .	1 x 1	1 q21	S100 calcium binding protein A14
TC01003197.hg	139	TC01003197.hg	MTMR11	7.40965	0.845922	2.03267	-1.98542	0.624661	13.4092	0 .	1 x 1	1 q21	myotubularin related protein 11
TC01002534.hg	140	TC01002534.hg	RHBDL2	5.2558	0.556278	2.03124	-1.18726	0.524466	10.3257	0 .	1 x 2	1 p34	rhomboid like 2
TC16001066.hg	141	TC16001066.hg		7.32747	0.690828	2.01698	-1.38368	0.560831	11.3551	0 .	1 x 2	16 p11	solute carrier family 6 member 10, pseudogene
TC03001345.hg	142	TC03001345.hg	CDCP1	8.44545	0.580166	2.00793	-2.31308	0.656933	14.606	0 .	1 x 2	3 p21	CUB domain containing protein 1
TC16001854.hg	143	TC16001854.hg		7.71402	0.693222	2.00428	-1.38412	0.563133	11.4233	0 .	1 x 2	16 p11	solute carrier family 6 member 10, pseudogene
TC21000737.hg	144	TC21000737.hg	BACE2	9.30273	0.716735	1.97406	-2.36899	0.578264	11.8814	0 .	1 x 2	21 q22	beta-secretase 2
TC06003051.hg	145	TC06003051.hg		6.33794	0.625999	1.94528	-0.974223	0.810874	23.2267	0 .	1 x 1	6 q23	novel transcript
TC12000182.hg	146	TC12000182.hg	GPRC5A	9.16922	1.19931	1.94217	-3.74934	0.697136	16.3	0 .	1 x 1	12 p13	G protein-coupled receptor class C group 5 member A
TC19001260.hg	147	TC19001260.hg		5.41431	0.511594	1.93915	-0.937975	0.643848	14.1055	0 .	2 x 1
TC20001373.hg	148	TC20001373.hg	SDCBP2	7.35924	0.563824	1.93095	-1.00351	0.661799	14.798	0 .	2 x 1	20 p13	novel protein
TC14001148.hg	149	TC14001148.hg	BMP4	7.69237	0.748115	1.92113	-1.71457	0.472606	8.98962	0 .	2 x 1	14 q22	bone morphogenetic protein 4
TC15002279.hg	150	TC15002279.hg		6.18656	0.817825	1.9115	-1.39146	0.786915	21.3773	0 .	1 x 1	15 q24	peptidylprolyl isomerase A pseudogene 46
TC02000227.hg	151	TC02000227.hg		5.15425	0.652392	1.89312	-1.25157	0.634714	13.7687	0 .	1 x 1
TC02003261.hg	152	TC02003261.hg		5.81138	0.714518	1.87047	-1.4348	0.824961	24.4676	0 .	1 x 1
TC08000482.hg	153	TC08000482.hg	RDH10	7.39801	0.611918	1.86831	-1.46516	0.493966	9.52336	0 .	1 x 2	8 q21	retinol dehydrogenase 10
TC01000353.hg	154	TC01000353.hg	SFN	8.90153	0.797846	1.84798	-2.35344	0.611558	12.957	0 .	1 x 2	1 p36	stratifin
TC18000103.hg	155	TC18000103.hg	LAMA3	7.20646	0.669384	1.83409	-1.79777	0.551298	11.0768	0 .	1 x 1	18 q11	laminin subunit alpha 3
TC10001497.hg	156	TC10001497.hg	ANKRD22	6.47054	0.852476	1.82559	-2.87037	0.487909	9.36979	0 .	1 x 2	10 q23	ankyrin repeat domain 22
TC09001842.hg	157	TC09001842.hg	ACER2	5.55224	0.630051	1.82512	-1.4941	0.475972	9.07233	0 .	1 x 2	9 p22	alkaline ceramidase 2
TC13001526.hg	158	TC13001526.hg		6.12688	0.571957	1.81368	-1.01507	0.773133	20.4339	0 .	1 x 1
TC02002194.hg	159	TC02002194.hg	MALL	8.4221	0.69577	1.7965	-1.86403	0.619946	13.2445	0 .	1 x 2	2 q13	mal, T cell differentiation protein like
TC21000736.hg	160	TC21000736.hg	BACE2	7.85504	0.693688	1.79207	-1.99679	0.58374	12.0517	0 .	1 x 2	21 q22	beta-secretase 2
TC12001226.hg	161	TC12001226.hg	STYK1	5.37376	0.531745	1.79178	-0.953216	0.6689	15.0841	0 .	1 x 2	12 p13	serine/threonine/tyrosine kinase 1
TC02004970.hg	162	TC02004970.hg	MXD1	8.04443	0.581654	1.78102	-1.41472	0.618559	13.1964	0 .	1 x 1	2 p13	MAX dimerization protein 1
TC01001928.hg	163	TC01001928.hg		5.96745	0.499773	1.76824	-1.10712	0.688739	15.9245	0 .	1 x 1
TC02003288.hg	164	TC02003288.hg		3.8213	0.540184	1.76266	-0.96147	0.723868	17.5874	0 .	1 x 1
TC03001888.hg	165	TC03001888.hg	TM4SF1	8.40467	0.742649	1.75505	-2.93582	0.459892	8.68176	2.22044604925031e-16 .	1 x 1	3 q25	transmembrane 4 L six family member 1
TC15001289.hg	166	TC15001289.hg	FRMD5	5.76637	0.529751	1.75455	-0.913244	0.595652	12.4308	0 .	2 x 1	15 q15	FERM domain containing 5
TC17000861.hg	167	TC17000861.hg	ITGB4	8.76618	0.704387	1.72402	-1.88085	0.740782	18.4858	0 .	1 x 1	17 q25	integrin subunit beta 4
TC21000185.hg	168	TC21000185.hg	BACE2	7.89515	0.560674	1.68501	-1.54797	0.602065	12.6401	0 .	1 x 2	21 q22	beta-secretase 2
TC12001513.hg	169	TC12001513.hg	KRT80	6.75244	0.488329	1.62161	-1.08139	0.726947	17.7457	0 .	2 x 1	12 q13	keratin 80
TC10001334.hg	170	TC10001334.hg		7.50922	0.699795	1.60314	-2.58913	0.461825	8.72814	1.11022302462516e-16 .	2 x 1
TC09001017.hg	171	TC09001017.hg		7.11986	0.690914	1.60153	-3.53492	0.45132	8.47805	6.66133814775094e-16 .	2 x 1
TC08002108.hg	172	TC08002108.hg		3.93606	0.506683	1.59414	-1.00381	0.752532	19.1551	0 .	1 x 1	8 q24	novel transcript
TC01002258.hg	173	TC01002258.hg	EPHA2	7.79983	0.497983	1.59309	-1.08862	0.751913	19.1189	0 .	2 x 1	1 p36	EPH receptor A2
TC19000191.hg	174	TC19000191.hg	LDLR	8.63624	0.740829	1.59272	-2.59391	0.54914	11.0146	0 .	1 x 2	19 p13	low density lipoprotein receptor
TC10002300.hg	175	TC10002300.hg	TCF7L2	6.45997	0.596028	1.58862	-1.68989	0.643513	14.0929	0 .	1 x 2	10 q25	transcription factor 7 like 2
TC0X001840.hg	176	TC0X001840.hg		4.43788	0.474345	1.58139	-1.05166	0.735522	18.1987	0 .	1 x 1
TC08002109.hg	177	TC08002109.hg		5.55949	0.541188	1.57702	-0.956187	0.728351	17.8186	0 .	1 x 1
TC15000464.hg	178	TC15000464.hg		7.11039	0.670432	1.57654	-3.01919	0.468114	8.88005	0 .	2 x 1
TC03002431.hg	179	TC03002431.hg		5.20608	0.461925	1.56894	-0.716867	0.815385	23.6101	0 .	1 x 1
TC15000834.hg	180	TC15000834.hg		4.55848	0.493472	1.53485	-1.20254	0.664312	14.8984	0 .	1 x 1	15 q25	novel transcript
TC06000009.hg	181	TC06000009.hg	FOXQ1	7.89572	0.774009	1.49333	-1.74079	0.41497	7.64552	1.65867319878998e-13 .	2 x 1	6 p25	forkhead box Q1
TC10000820.hg	182	TC10000820.hg	TCF7L2	7.58934	0.494724	1.43345	-1.61963	0.674734	15.3247	0 .	1 x 2	10 q25	transcription factor 7 like 2
TC0X002144.hg	183	TC0X002144.hg		4.36057	0.41766	1.42766	-0.761021	0.700146	16.4378	0 .	2 x 1
TC14001238.hg	184	TC14001238.hg	PLEK2	8.38727	0.647948	1.41719	-2.14085	0.681545	15.6124	0 .	1 x 2	14 q24	pleckstrin 2
TC10000022.hg	185	TC10000022.hg	PFKP	7.82115	0.471788	1.39678	-1.33878	0.654356	14.5057	0 .	2 x 1	10 p15	phosphofructokinase, platelet
TC05000685.hg	186	TC05000685.hg		5.22622	0.433847	1.33041	-1.21465	0.715792	17.1826	0 .	2 x 1	5 q31	TRPC7 antisense RNA 2
TC08000470.hg	187	TC08000470.hg		4.20045	0.369856	1.28876	-0.664962	0.699696	16.4171	0 .	2 x 1	8 q13	novel transcript
TC06002265.hg	188	TC06002265.hg	EZR	10.4563	0.523164	1.27336	-1.54708	0.736519	18.2525	0 .	1 x 2	6 q25	ezrin
TC04000072.hg	189	TC04000072.hg	S100P	6.45972	0.484287	1.26256	-1.21493	0.694379	16.1753	0 .	1 x 2	4 p16	S100 calcium binding protein P
TC01000450.hg	190	TC01000450.hg	GJB3	6.26075	0.411933	1.23371	-0.884499	0.781517	20.9985	0 .	2 x 1	1 p34	gap junction protein beta 3
TC11002541.hg	191	TC11002541.hg		6.32152	0.4145	1.20998	-0.996305	0.704755	16.6521	0 .	2 x 1
TC18000534.hg	192	TC18000534.hg		5.08419	0.438284	1.10727	-0.840625	0.791444	21.705	0 .	1 x 1	18 q21	long intergenic non-protein coding RNA, regulator of reprogramming

## Sheet: SpotB
	Rank	ID	Symbol	mean expression	SD	max delta e	min delta e	correlation	->t.score	->p.value	Metagene	Chromosome	Description
TC08000914.hg	1	TC08000914.hg	DEFA5	5.11757	1.60002	7.26521	-1.44466	0.455209	8.57011	3.33066907387547e-16 .	1 x 16	8 p23	defensin alpha 5
TC08000907.hg	2	TC08000907.hg	DEFA6	3.22838	1.31183	6.84613	-1.07952	0.374445	6.76931	3.76743081176301e-11 .	1 x 15	8 p23	defensin alpha 6
TC06001952.hg	3	TC06001952.hg	EPHA7	4.26434	1.50586	6.59491	-0.924113	0.816647	23.7197	0 .	1 x 16	6 q16	EPH receptor A7
TC02002019.hg	4	TC02002019.hg	REG3A	5.80734	1.30698	6.06555	-1.13591	0.620409	13.2605	0 .	1 x 16	2 p12	regenerating family member 3 alpha
TC12001681.hg	5	TC12001681.hg	WIF1	5.47764	1.50774	5.77982	-1.23357	0.838959	25.8428	0 .	1 x 16	12 q14	WNT inhibitory factor 1
TC0X000065.hg	6	TC0X000065.hg	GLRA2	4.56214	1.18082	5.36027	-1.12052	0.346424	6.19044	1.05956465823454e-09 .	1 x 17	X p22	glycine receptor alpha 2
TC12002600.hg	7	TC12002600.hg		3.04565	1.38097	5.2696	-1.39379	0.755657	19.3401	0 .	1 x 16	12 q24	novel transcript
TC0X000884.hg	8	TC0X000884.hg		5.6264	1.37749	5.21443	-1.4914	0.514698	10.0632	0 .	1 x 16	X p22	novel transcript, antisense to MAGEB17
TC12000917.hg	9	TC12000917.hg		3.11289	1.26609	5.20171	-1.24467	0.762593	19.7617	0 .	1 x 16	12 q24	novel transcript
TC02002017.hg	10	TC02002017.hg	REG1B	5.06265	1.17276	5.11011	-1.03864	0.385674	7.00719	9.01512198225873e-12 .	1 x 16	2 p12	regenerating family member 1 beta
TC05003154.hg	11	TC05003154.hg	PCSK1	4.03395	1.07234	5.0388	-1.0353	0.556369	11.224	0 .	1 x 16	5 q15	proprotein convertase subtilisin/kexin type 1
TC07000562.hg	12	TC07000562.hg	PEG10	5.31095	0.734498	5.03252	-0.732499	0.468083	8.8793	0 .	1 x 16	7 q21	paternally expressed 10
TC09001086.hg	13	TC09001086.hg	IGFBPL1	4.13559	0.974333	5.00941	-1.25829	0.670919	15.1668	0 .	1 x 16	9 p13	insulin like growth factor binding protein like 1
TC02000488.hg	14	TC02000488.hg	REG1A	5.89578	1.28435	4.98243	-1.20302	0.376951	6.82209	2.75098832602794e-11 .	1 x 16	2 p12	regenerating family member 1 alpha
TC16001545.hg	15	TC16001545.hg		4.98018	1.02549	4.93484	-0.988821	0.405579	7.43796	6.23057161419638e-13 .	1 x 15	16 q12	novel transcript
TC02002490.hg	16	TC02002490.hg	SLC38A11	4.13305	1.05022	4.87008	-1.08542	0.574463	11.7647	0 .	1 x 16	2 q24	solute carrier family 38 member 11
TC02002835.hg	17	TC02002835.hg	TM4SF20	5.26155	1.53225	4.85972	-1.84694	0.43737	8.1528	5.99520433297585e-15 .	1 x 15	2 q36	transmembrane 4 L six family member 20
TC08001010.hg	18	TC08001010.hg	FGF20	5.57134	0.757372	4.85115	-0.842095	0.643034	14.0751	0 .	1 x 15	8 p22	fibroblast growth factor 20
TC10000127.hg	19	TC10000127.hg		3.90861	0.970057	4.81027	-0.826416	0.582532	12.0139	0 .	1 x 16	10 p12	ST8SIA6 antisense RNA 1
TC10001968.hg	20	TC10001968.hg		3.01688	0.930111	4.7625	-1.12295	0.630204	13.6061	0 .	1 x 15
TC04001635.hg	21	TC04001635.hg		5.47991	1.01439	4.75803	-1.42886	0.379514	6.87626	1.98884242408326e-11 .	1 x 16
TC05001614.hg	22	TC05001614.hg	PCSK1	5.01492	0.878152	4.70382	-0.722723	0.521576	10.2475	0 .	1 x 16	5 q15	proprotein convertase subtilisin/kexin type 1
TC10001920.hg	23	TC10001920.hg		4.12692	0.934406	4.70228	-0.827243	0.573958	11.7492	0 .	1 x 16	10 p12	ST8SIA6 antisense RNA 1
TC06002620.hg	24	TC06002620.hg		2.47249	0.872045	4.68857	-0.766615	0.690456	16.0002	0 .	1 x 16	6 p22	novel transcript
TC13000769.hg	25	TC13000769.hg	SLITRK6	3.47897	1.14856	4.63705	-1.14351	0.366335	6.59968	1.02328256978979e-10 .	1 x 16	13 q31	SLIT and NTRK like family member 6
TC06000984.hg	26	TC06000984.hg	ENPP3	5.41438	1.55016	4.60719	-1.73921	0.602053	12.6397	0 .	1 x 16	6 q23	ectonucleotide pyrophosphatase/phosphodiesterase 3
TC07002473.hg	27	TC07002473.hg	TAC1	3.4312	0.672969	4.58096	-0.891692	0.413462	7.612	2.05613304160579e-13 .	1 x 14	7 q21	tachykinin precursor 1
TC12000927.hg	28	TC12000927.hg		8.6319	1.09652	4.46416	-1.4372	0.540002	10.755	0 .	1 x 16
TC05001329.hg	29	TC05001329.hg	HCN1	4.56984	0.88337	4.46025	-1.02076	0.548279	10.9899	0 .	1 x 15	5 p12	hyperpolarization activated cyclic nucleotide gated potassium channel 1
TC09001648.hg	30	TC09001648.hg		8.50799	1.01681	4.44649	-1.32043	0.478768	9.14139	0 .	1 x 16
TC11003349.hg	31	TC11003349.hg	DRD2	5.35815	0.912285	4.44551	-1.39056	0.378604	6.857	2.23248086683725e-11 .	1 x 15	11 q23	dopamine receptor D2
TC20000718.hg	32	TC20000718.hg	CST1	7.46574	1.35839	4.42542	-1.77783	0.591983	12.3127	0 .	1 x 15	20 p11	cystatin SN
TC20000717.hg	33	TC20000717.hg	CST4	6.30816	1.07559	4.30583	-1.72214	0.549573	11.0271	0 .	1 x 15	20 p11	cystatin S
TC05002800.hg	34	TC05002800.hg		8.63927	1.14675	4.3058	-1.27549	0.589088	12.2204	0 .	1 x 16
TC09002494.hg	35	TC09002494.hg	IGFBPL1	5.09479	0.776876	4.27552	-0.959427	0.678498	15.4828	0 .	1 x 16	9 p13	insulin like growth factor binding protein like 1
TC03000846.hg	36	TC03000846.hg	MME	6.17047	1.50439	4.26711	-1.90903	0.464605	8.79507	0 .	1 x 15	3 q25	membrane metalloendopeptidase
TC06001978.hg	37	TC06001978.hg		9.03181	1.0518	4.23699	-1.45403	0.617473	13.159	0 .	1 x 16
TC08002379.hg	38	TC08002379.hg	SBSPON	4.44795	0.857084	4.21113	-1.02227	0.48607	9.32352	0 .	1 x 15	8 q21	somatomedin B and thrombospondin type 1 domain containing
TC12001277.hg	39	TC12001277.hg	ERP27	6.69421	1.3302	4.20956	-2.03103	0.519787	10.1993	0 .	1 x 17	12 p12	endoplasmic reticulum protein 27
TC05000750.hg	40	TC05000750.hg	PCDHB8	5.19602	0.771524	4.19728	-1.21163	0.420502	7.76916	7.46069872548105e-14 .	1 x 17	5 q31	protocadherin beta 8
TC16000648.hg	41	TC16000648.hg		5.55615	0.94121	4.19448	-2.1505	0.361763	6.50481	1.77560743885863e-10 .	1 x 17
TC02001071.hg	42	TC02001071.hg	OSBPL6	4.84359	1.00754	4.17471	-0.82853	0.852721	27.3643	0 .	1 x 16	2 q31	oxysterol binding protein like 6
TC16000285.hg	43	TC16000285.hg	HS3ST4	5.77408	0.648525	4.14559	-0.7258	0.454497	8.55322	4.44089209850063e-16 .	1 x 14	16 p12	heparan sulfate-glucosamine 3-sulfotransferase 4
TC06000639.hg	44	TC06000639.hg		8.12658	0.991293	4.11662	-1.37433	0.561373	11.3711	0 .	1 x 16
TC04001268.hg	45	TC04001268.hg	SULT1E1	3.13925	0.983774	4.11274	-0.835605	0.596413	12.4554	0 .	1 x 16	4 q13	sulfotransferase family 1E member 1
TC15000452.hg	46	TC15000452.hg		9.02452	1.03541	4.11157	-1.38857	0.605618	12.7577	0 .	1 x 16
TC02001940.hg	47	TC02001940.hg		9.16151	1.06555	4.10786	-1.47133	0.627161	13.4976	0 .	1 x 16
TC07001784.hg	48	TC07001784.hg		9.55978	0.966237	4.09934	-1.26446	0.599116	12.5434	0 .	1 x 16
TC02002517.hg	49	TC02002517.hg		4.80685	1.07642	4.03066	-1.11754	0.608653	12.8591	0 .	1 x 15	2 q31	novel transcript, antisense to MYO3B
TC06002176.hg	50	TC06002176.hg		6.38456	1.12242	4.00447	-1.38962	0.71441	17.1148	0 .	1 x 16
TC02002456.hg	51	TC02002456.hg		9.60555	0.950583	3.99584	-1.35705	0.607994	12.837	0 .	1 x 16
TC02000944.hg	52	TC02000944.hg	GALNT13	2.92307	0.888426	3.99541	-0.538139	0.862209	28.5326	0 .	1 x 16	2 q23	polypeptide N-acetylgalactosaminyltransferase 13
TC01000593.hg	53	TC01000593.hg	CYP4X1	5.66345	1.23139	3.94304	-1.4495	0.606175	12.7762	0 .	1 x 16	1 p33	cytochrome P450 family 4 subfamily X member 1
TC13000113.hg	54	TC13000113.hg	KL	5.06287	0.985352	3.93282	-0.891068	0.834642	25.4018	0 .	1 x 16	13 q13	klotho
TC03000444.hg	55	TC03000444.hg	ROBO2	4.62692	0.654287	3.88443	-0.77829	0.433489	8.06361	1.0769163338864e-14 .	2 x 16	3 p12	roundabout guidance receptor 2
TC19000767.hg	56	TC19000767.hg		8.41154	0.976297	3.87526	-1.30537	0.626627	13.4787	0 .	1 x 16
TC02000729.hg	57	TC02000729.hg	WASHC1	5.01582	1.47658	3.85903	-3.7307	0.52687	10.3912	0 .	1 x 16	2 q14	phosphoglucomutase 5 pseudogene 4
TC02000205.hg	58	TC02000205.hg		8.39286	0.730277	3.8394	-1.04184	0.469606	8.91635	0 .	1 x 16
TC12002598.hg	59	TC12002598.hg		5.79992	0.957266	3.81137	-0.847616	0.793372	21.8474	0 .	1 x 16	12 q24	novel transcript
TC06001041.hg	60	TC06001041.hg		6.28824	0.996695	3.80851	-1.47103	0.72102	17.443	0 .	1 x 16
TC03000828.hg	61	TC03000828.hg		3.92734	0.956498	3.80207	-1.36702	0.358683	6.44122	2.56128340758721e-10 .	1 x 15	3 q25	arylacetamide deacetylase pseudogene 1
TC03000510.hg	62	TC03000510.hg	ADGRG7	4.78177	1.24465	3.80192	-1.5111	0.490637	9.43874	0 .	1 x 16	3 q12	adhesion G protein-coupled receptor G7
TC02004919.hg	63	TC02004919.hg	HOXD10	6.12037	1.07482	3.80008	-1.24034	0.515595	10.0871	0 .	1 x 15	2 q31	homeobox D10
TC08001325.hg	64	TC08001325.hg	SBSPON	5.65337	1.0627	3.79555	-1.40892	0.430193	7.98831	1.77635683940025e-14 .	1 x 15	8 q21	somatomedin B and thrombospondin type 1 domain containing
TC04002753.hg	65	TC04002753.hg	CLGN	3.65387	0.663916	3.78692	-0.755988	0.399736	7.31026	1.39066536064547e-12 .	2 x 17	4 q31	calmegin
TC05000754.hg	66	TC05000754.hg	PCDHB11	5.38201	0.712145	3.78247	-1.18058	0.406676	7.46206	5.349054532644e-13 .	1 x 17	5 q31	protocadherin beta 11
TC06002933.hg	67	TC06002933.hg		3.13222	0.489011	3.76501	-0.506242	0.534366	10.5976	0 .	2 x 15
TC12000916.hg	68	TC12000916.hg		5.88019	0.937789	3.75264	-0.859391	0.793262	21.8393	0 .	1 x 16	12 q24	novel transcript
TC12001763.hg	69	TC12001763.hg		4.64399	1.10226	3.74506	-1.39421	0.534715	10.6072	0 .	1 x 15	12 q21	novel transcript, antisense to SYT1
TC03002604.hg	70	TC03002604.hg		3.88422	0.918892	3.71415	-1.25483	0.353401	6.33271	4.75778416664241e-10 .	1 x 15	3 q25	arylacetamide deacetylase pseudogene 1
TC01004900.hg	71	TC01004900.hg		3.43271	0.5807	3.70919	-0.734663	0.599704	12.5626	0 .	1 x 15	1 q31	endogenous retrovirus group MER61 member 1
TC09001202.hg	72	TC09001202.hg	TRPM3	4.49648	0.840386	3.69323	-0.671623	0.886888	32.1806	0 .	1 x 16	9 q21	transient receptor potential cation channel subfamily M member 3
TC13000783.hg	73	TC13000783.hg		5.20312	0.941591	3.68929	-1.42598	0.375467	6.79081	3.31509264483998e-11 .	1 x 16
TC09001186.hg	74	TC09001186.hg	TMEM252	4.81701	0.829702	3.63992	-0.897404	0.73014	17.9122	0 .	1 x 16	9 q21	transmembrane protein 252
TC09000899.hg	75	TC09000899.hg	GLDC	5.75986	0.982996	3.61578	-1.21244	0.580983	11.9657	0 .	1 x 16	9 p24	glycine decarboxylase
TC12001033.hg	76	TC12001033.hg	FZD10	5.59513	1.01324	3.60522	-1.06071	0.612463	12.9877	0 .	1 x 15	12 q24	frizzled class receptor 10
TC02004730.hg	77	TC02004730.hg	CERKL	3.93723	0.848577	3.59286	-1.0086	0.640636	13.9859	0 .	1 x 15	2 q31	ceramide kinase like
TC09000971.hg	78	TC09000971.hg		8.59656	0.794249	3.59121	-1.18069	0.418337	7.72065	1.02140518265514e-13 .	1 x 16
TC02004827.hg	79	TC02004827.hg		2.80324	0.76657	3.5755	-0.735464	0.800474	22.3875	0 .	1 x 16	2 q36	novel transcript
TC03002564.hg	80	TC03002564.hg	CLSTN2	5.45751	0.894097	3.55845	-1.16676	0.574755	11.7736	0 .	1 x 16	3 q23	calsyntenin 2
TC05001429.hg	81	TC05001429.hg		3.82884	0.956732	3.54957	-1.20897	0.588018	12.1864	0 .	1 x 16	5 q13	novel transcript
TC02004684.hg	82	TC02004684.hg		5.04924	0.905194	3.54721	-0.976054	0.607346	12.8153	0 .	1 x 15	2 q31	novel transcript, antisense to MYO3B
TC01003653.hg	83	TC01003653.hg	B3GALT2	3.82276	0.711799	3.54138	-0.968865	0.433649	8.06727	1.04360964314765e-14 .	1 x 16	1 q31	beta-1,3-galactosyltransferase 2
TC11003106.hg	84	TC11003106.hg		2.32587	0.601877	3.52742	-0.753772	0.60665	12.7921	0 .	1 x 15
TC13001632.hg	85	TC13001632.hg	DCT	3.92331	0.703359	3.52402	-0.699593	0.714078	17.0986	0 .	1 x 16	13 q32	dopachrome tautomerase
TC05002678.hg	86	TC05002678.hg	KCTD16	3.42232	0.840154	3.52015	-0.840621	0.836848	25.6251	0 .	1 x 16	5 q31	potassium channel tetramerization domain containing 16
TC02003349.hg	87	TC02003349.hg		4.48052	0.774154	3.51866	-1.11212	0.691025	16.0254	0 .	1 x 16	2 p12	novel transcript, antisense to EVA1A
TC03000754.hg	88	TC03000754.hg	CLSTN2	6.32375	0.799818	3.4613	-1.13199	0.595261	12.4182	0 .	1 x 16	3 q23	calsyntenin 2
TC02002180.hg	89	TC02002180.hg		4.67336	1.14243	3.45897	-1.69709	0.326606	5.79258	9.2723839717479e-09 .	1 x 14	2 q12	long intergenic non-protein coding RNA 1594
TC04001263.hg	90	TC04001263.hg	UGT2A3	5.39056	1.28417	3.4133	-2.15309	0.525851	10.3634	0 .	1 x 17	CHR_HSCHR4_1_CTG9 q13	UDP glucuronosyltransferase family 2 member A3
TC02003666.hg	91	TC02003666.hg	CSRNP3	3.43177	0.715152	3.40197	-1.17289	0.604239	12.7119	0 .	1 x 17	2 q24	cysteine and serine rich nuclear protein 3
TC12001712.hg	92	TC12001712.hg	BEST3	3.46223	0.49435	3.39351	-0.458712	0.682892	15.6702	0 .	1 x 15	12 q15	bestrophin 3
TC01006110.hg	93	TC01006110.hg	ESRRG	4.30231	0.740024	3.38962	-1.05231	0.683912	15.7141	0 .	1 x 16	1 q41	estrogen related receptor gamma
TC10000302.hg	94	TC10000302.hg	NPY4R	5.47603	0.902776	3.38118	-1.24631	0.612409	12.9858	0 .	1 x 15	10 q11	neuropeptide Y receptor Y4
TC13000132.hg	95	TC13000132.hg	FREM2	5.31929	0.986138	3.37264	-1.2757	0.759529	19.5735	0 .	1 x 16	13 q13	FRAS1 related extracellular matrix 2
TC01001608.hg	96	TC01001608.hg		3.56979	0.520799	3.37173	-0.580981	0.651546	14.3973	0 .	1 x 16	1 q31	endogenous retrovirus group MER61 member 1
TC07001828.hg	97	TC07001828.hg	GPR37	4.25003	0.631968	3.35249	-0.962802	0.659322	14.6999	0 .	1 x 16	7 q31	G protein-coupled receptor 37
TC4_ctg9_hap1000005.hg	98	TC4_ctg9_hap1000005.hg	UGT2A3	5.39916	1.24551	3.33436	-2.21899	0.521858	10.2551	0 .	1 x 17	CHR_HSCHR4_1_CTG9 q13	UDP glucuronosyltransferase family 2 member A3
TC14000291.hg	99	TC14000291.hg	ABHD12B	4.32794	1.03227	3.33041	-1.0518	0.38832	7.06377	6.38489261461928e-12 .	1 x 14	14 q22	abhydrolase domain containing 12B
TC02000473.hg	100	TC02000473.hg		4.40369	0.734027	3.32054	-1.26502	0.692488	16.0906	0 .	1 x 16	2 p12	novel transcript, antisense to EVA1A
TC18000135.hg	101	TC18000135.hg	MEP1B	3.27177	0.709135	3.31871	-0.647765	0.771132	20.3032	0 .	1 x 16	18 q12	meprin A subunit beta
TC0X001493.hg	102	TC0X001493.hg	GABRA3	4.53456	0.86249	3.30062	-0.847445	0.592703	12.3358	0 .	1 x 15	X q28	gamma-aminobutyric acid type A receptor alpha3 subunit
TC01002569.hg	103	TC01002569.hg	GUCA2A	6.68858	0.733845	3.29184	-0.902366	0.751946	19.1208	0 .	1 x 16	1 p34	guanylate cyclase activator 2A
TC0X002025.hg	104	TC0X002025.hg	DMD	6.12246	1.18182	3.28205	-2.27516	0.435777	8.11613	7.54951656745106e-15 .	1 x 17	X p21	dystrophin
TC0X001207.hg	105	TC0X001207.hg	PCDH19	4.57907	0.899064	3.27298	-0.943751	0.56945	11.6124	0 .	1 x 15	X q22	protocadherin 19
TC04002580.hg	106	TC04002580.hg	UGT2A3	5.49898	1.24195	3.26445	-2.295	0.521715	10.2513	0 .	1 x 17	CHR_HSCHR4_1_CTG9 q13	UDP glucuronosyltransferase family 2 member A3
TC02004488.hg	107	TC02004488.hg		4.18617	0.920886	3.25505	-1.41574	0.29499	5.17524	2.16958578214133e-07 .	1 x 14	2 q12	long intergenic non-protein coding RNA 1594
TC02003411.hg	108	TC02003411.hg		5.73059	0.968375	3.24379	-1.56863	0.586832	12.1489	0 .	1 x 16
TC16002013.hg	109	TC16002013.hg		9.18008	0.779646	3.2249	-1.32529	0.676153	15.3841	0 .	1 x 16
TC08001593.hg	110	TC08001593.hg	ANXA13	5.96584	1.17108	3.21613	-2.15836	0.553131	11.1298	0 .	1 x 16	8 q24	annexin A13
TC05001593.hg	111	TC05001593.hg		6.73565	0.891433	3.21209	-1.51806	0.643956	14.1095	0 .	1 x 16
TC12001745.hg	112	TC12001745.hg	CAPS2	3.87931	0.803656	3.19583	-0.836282	0.843173	26.2891	0 .	1 x 16	12 q21	calcyphosine 2
TC06001332.hg	113	TC06001332.hg		5.3196	0.847955	3.16245	-1.21715	0.505806	9.82888	0 .	1 x 17	6 p22	cytidine monophospho-N-acetylneuraminic acid hydroxylase, pseudogene
TC06000705.hg	114	TC06000705.hg		6.31211	0.801947	3.16186	-1.20893	0.691228	16.0344	0 .	1 x 16
TC0Y000317.hg	115	TC0Y000317.hg	UTY	6.3186	1.65068	3.1504	-3.1771	0.254937	4.41956	7.06991344423535e-06 .	1 x 17	Y q11	ubiquitously transcribed tetratricopeptide repeat containing, Y-linked
TC16001088.hg	116	TC16001088.hg	NETO2	7.14495	1.10008	3.13189	-2.32742	0.604046	12.7055	0 .	1 x 17	16 q12	neuropilin and tolloid like 2
TC02000986.hg	117	TC02000986.hg	CSRNP3	4.54011	0.515424	3.13136	-0.761351	0.523382	10.2963	0 .	2 x 16	2 q24	cysteine and serine rich nuclear protein 3
TC05002988.hg	118	TC05002988.hg	EMB	7.3532	1.20196	3.11593	-3.07097	0.468707	8.89448	0 .	1 x 17	1 p11	embigin pseudogene 1
TC06003526.hg	119	TC06003526.hg		5.74869	0.883044	3.10477	-1.52638	0.474029	9.02453	0 .	1 x 17	6 p22	cytidine monophospho-N-acetylneuraminic acid hydroxylase, pseudogene
TC05002818.hg	120	TC05002818.hg		8.34431	0.619021	3.09417	-0.964122	0.502036	9.73081	0 .	1 x 16	5 p15	novel transcript
TC15000879.hg	121	TC15000879.hg		4.11444	0.804491	3.09003	-1.13667	0.388002	7.05696	6.65634214414013e-12 .	2 x 16	15 q26	novel transcript
TC02000396.hg	122	TC02000396.hg		7.72058	0.687173	3.0408	-1.2335	0.598726	12.5306	0 .	1 x 16
TC0Y000354.hg	123	TC0Y000354.hg		5.17743	1.5021	3.01189	-2.12979	0.281982	4.92682	7.14688750402814e-07 .	1 x 17	Y q11	taxilin gamma pseudogene, Y-linked
TC04002579.hg	124	TC04002579.hg		4.52557	0.727108	3.00542	-0.980696	0.561209	11.3663	0 .	1 x 15
TC10000199.hg	125	TC10000199.hg	BAMBI	7.15705	1.00753	2.99899	-1.6197	0.439734	8.2074	4.10782519111308e-15 .	1 x 15	10 p12	BMP and activin membrane bound inhibitor
TC17001139.hg	126	TC17001139.hg	PIRT	4.75914	0.542761	2.99229	-0.642882	0.812895	23.397	0 .	1 x 16	17 p12	phosphoinositide interacting regulator of transient receptor potential channels
TC08001518.hg	127	TC08001518.hg		3.7192	0.472802	2.98979	-0.671061	0.633925	13.7401	0 .	1 x 14	8 q23	novel transcript
TC17002051.hg	128	TC17002051.hg	SHISA6	4.08476	0.762539	2.96465	-1.01441	0.579521	11.9203	0 .	1 x 16	17 p12	shisa family member 6
TC06000097.hg	129	TC06000097.hg	RNF182	5.176	0.50844	2.93926	-0.589246	0.630282	13.6088	0 .	1 x 15	6 p23	ring finger protein 182
TC16001257.hg	130	TC16001257.hg	PMFBP1	5.6792	0.753093	2.93758	-0.964552	0.743227	18.6218	0 .	1 x 16	16 q22	polyamine modulated factor 1 binding protein 1
TC16000982.hg	131	TC16000982.hg		5.37189	0.562796	2.92984	-0.844257	0.476799	9.09271	0 .	2 x 16	16 p12	RNA, U6 small nuclear 1241, pseudogene
TC02004723.hg	132	TC02004723.hg	PDE11A	3.33915	0.777006	2.91895	-1.01944	0.758097	19.4866	0 .	1 x 16	2 q31	phosphodiesterase 11A
TC01004902.hg	133	TC01004902.hg		2.98251	0.553753	2.91779	-0.686514	0.719253	17.3543	0 .	1 x 15	1 q31	endogenous retrovirus group MER61 member 1
TC02003604.hg	134	TC02003604.hg		3.67315	0.533817	2.91132	-0.803695	0.528855	10.4455	0 .	2 x 15	2 q22	TEC
TC0Y000351.hg	135	TC0Y000351.hg	RPS4Y1	6.22728	1.24087	2.91042	-1.8656	0.297427	5.22211	1.72387655372752e-07 .	1 x 17	Y p11	ribosomal protein S4 Y-linked 1
TC03002845.hg	136	TC03002845.hg		4.41647	0.858708	2.88516	-1.12604	0.578151	11.878	0 .	1 x 16	3 p24	long intergenic non-protein coding RNA 1967
TC09000515.hg	137	TC09000515.hg	PLPPR1	4.72806	0.64148	2.88406	-0.66335	0.86558	28.9749	0 .	1 x 16	CHR_HSCHR9_1_CTG5 q31	phospholipid phosphatase related 1
TC07000133.hg	138	TC07000133.hg	DNAH11	3.8716	0.608787	2.87898	-0.592729	0.722252	17.5052	0 .	1 x 16	7 p15	dynein axonemal heavy chain 11
TC10001340.hg	139	TC10001340.hg	DNAJC12	4.82901	0.74049	2.8729	-0.98283	0.492342	9.482	0 .	1 x 17	10 q21	DnaJ heat shock protein family (Hsp40) member C12
TC10000366.hg	140	TC10000366.hg	PHYHIPL	5.20264	0.872467	2.86791	-0.956568	0.786146	21.3226	0 .	1 x 16	10 q21	phytanoyl-CoA 2-hydroxylase interacting protein like
TC08001248.hg	141	TC08001248.hg	TOX	6.12208	0.873222	2.85434	-1.43031	0.675259	15.3467	0 .	1 x 16	8 q12	thymocyte selection associated high mobility group box
TC06001772.hg	142	TC06001772.hg	CYP39A1	5.56268	0.985533	2.83481	-2.06458	0.630618	13.6209	0 .	1 x 16	6 p12	cytochrome P450 family 39 subfamily A member 1
TC02002539.hg	143	TC02002539.hg	GPR155	6.12846	0.8901	2.83387	-1.59062	0.573915	11.7479	0 .	1 x 16	2 q31	G protein-coupled receptor 155
TC13000943.hg	144	TC13000943.hg		3.54007	0.743309	2.8328	-0.962397	0.612003	12.9721	0 .	1 x 16	13 q12	long intergenic non-protein coding RNA 540
TC02000947.hg	145	TC02000947.hg	KCNJ3	4.26646	0.838584	2.81732	-0.938863	0.656785	14.6002	0 .	1 x 16	2 q24	potassium inwardly rectifying channel subfamily J member 3
TC16001125.hg	146	TC16001125.hg	CRNDE	6.09004	0.757321	2.81208	-1.16345	0.61018	12.9105	0 .	1 x 16	16 q12	colorectal neoplasia differentially expressed
TC01003226.hg	147	TC01003226.hg	SELENBP1	7.70265	0.747656	2.80931	-1.01976	0.649958	14.3365	0 .	1 x 16	1 q21	selenium binding protein 1
TC03002849.hg	148	TC03002849.hg		3.21804	0.558741	2.78439	-0.783804	0.488242	9.3782	0 .	1 x 14
TC16000440.hg	149	TC16000440.hg	NKD1	8.57155	1.13313	2.78007	-2.0736	0.641685	14.0248	0 .	1 x 15	16 q12	NKD inhibitor of WNT signaling pathway 1
TC05001331.hg	150	TC05001331.hg	EMB	6.62317	1.06184	2.75837	-2.56628	0.472885	8.99645	0 .	1 x 17	5 q11	embigin
TC13000049.hg	151	TC13000049.hg	TNFRSF19	5.68892	0.732319	2.75179	-0.805481	0.792161	21.7578	0 .	1 x 16	13 q12	TNF receptor superfamily member 19
TC0X001181.hg	152	TC0X001181.hg		3.24843	0.892191	2.75	-1.39011	0.411964	7.57878	2.54463117244086e-13 .	1 x 17	X q21	charged multivesicular body protein 1B2, pseudogene
TC03001648.hg	153	TC03001648.hg		5.64529	0.828506	2.7475	-1.58755	0.533327	10.5687	0 .	1 x 15	3 q13	novel transcript
TC12002173.hg	154	TC12002173.hg		4.40857	0.542858	2.74189	-0.897756	0.654161	14.4981	0 .	1 x 16
TC08002058.hg	155	TC08002058.hg	RIMS2	3.25109	0.418868	2.73901	-0.628085	0.638758	13.9166	0 .	2 x 15	8 q22	regulating synaptic membrane exocytosis 2
TC03001841.hg	156	TC03001841.hg		9.48997	0.6162	2.73354	-1.02847	0.64576	14.1772	0 .	1 x 16
TC08000801.hg	157	TC08000801.hg		10.53	0.952799	2.72531	-1.56672	0.698465	16.3606	0 .	1 x 16
TC06001189.hg	158	TC06001189.hg	SMOC2	7.4521	1.14167	2.70968	-2.04874	0.467931	8.87561	0 .	1 x 17	6 q27	SPARC related modular calcium binding 2
TC10002661.hg	159	TC10002661.hg		4.51184	0.642756	2.70344	-0.838458	0.745195	18.7326	0 .	1 x 16
TC21000187.hg	160	TC21000187.hg	FAM3B	5.76595	0.753357	2.69847	-0.927352	0.563547	11.4356	0 .	1 x 15	21 q22	family with sequence similarity 3 member B
TC07002052.hg	161	TC07002052.hg		8.50328	0.92343	2.69334	-1.6926	0.663261	14.8563	0 .	1 x 16
TC06000889.hg	162	TC06000889.hg	SLC16A10	6.10362	0.748245	2.68077	-1.80793	0.453857	8.53803	4.44089209850063e-16 .	1 x 17	6 q21	solute carrier family 16 member 10
TC02003242.hg	163	TC02003242.hg		3.9319	0.694706	2.68015	-1.42252	0.583118	12.0322	0 .	1 x 15
TC12001328.hg	164	TC12001328.hg	ITPR2	7.98147	0.884922	2.6773	-2.31371	0.549093	11.0133	0 .	1 x 17	12 p11	inositol 1,4,5-trisphosphate receptor type 2
TC16001221.hg	165	TC16001221.hg	TMED6	4.78836	0.737252	2.67477	-1.22222	0.642718	14.0633	0 .	1 x 16	16 q22	novel protein
TC01006396.hg	166	TC01006396.hg		3.19458	0.677814	2.66739	-0.727213	0.61456	13.0591	0 .	1 x 16	1 p13	SLC25A24 pseudogene 1
TC14002014.hg	167	TC14002014.hg		4.03893	0.599916	2.66164	-1.10998	0.542057	10.8129	0 .	1 x 14
TC04002545.hg	168	TC04002545.hg		3.03429	0.614734	2.65887	-0.904306	0.560284	11.339	0 .	2 x 16
TC09000096.hg	169	TC09000096.hg		2.99484	0.624229	2.65068	-0.988056	0.572919	11.7176	0 .	1 x 16
TC02002365.hg	170	TC02002365.hg	NCKAP5	5.25487	0.773986	2.64559	-1.04235	0.806395	22.8579	0 .	1 x 16	2 q21	NCK associated protein 5
TC01004676.hg	171	TC01004676.hg	EMB	6.58022	1.07976	2.64512	-2.60778	0.454395	8.5508	4.44089209850063e-16 .	1 x 17	1 p11	embigin pseudogene 1
TC02000184.hg	172	TC02000184.hg	PLB1	5.88059	0.534809	2.64341	-0.617566	0.817202	23.7681	0 .	1 x 16	2 p23	phospholipase B1
TC04000548.hg	173	TC04000548.hg	NPNT	6.83137	0.878671	2.62069	-1.85711	0.455646	8.58048	3.33066907387547e-16 .	1 x 17	4 q24	nephronectin
TC11003067.hg	174	TC11003067.hg	SOX6	4.19906	0.825787	2.61782	-1.41023	0.682283	15.644	0 .	1 x 17	11 p15	SRY-box transcription factor 6
TC22000773.hg	175	TC22000773.hg	ELFN2	6.57144	0.723836	2.60626	-1.30861	0.612336	12.9834	0 .	1 x 16	22 q13	extracellular leucine rich repeat and fibronectin type III domain containing 2
TC08000302.hg	176	TC08000302.hg		7.59026	0.733539	2.60614	-1.04328	0.523422	10.2974	0 .	1 x 16
TC18000051.hg	177	TC18000051.hg	APCDD1	8.03521	0.552406	2.59959	-1.02052	0.555064	11.186	0 .	1 x 14	18 p11	APC down-regulated 1
TC01004894.hg	178	TC01004894.hg		3.08883	0.777861	2.59347	-0.90624	0.402176	7.36345	9.96425164601078e-13 .	1 x 14	1 q25	TEC
TC01000725.hg	179	TC01000725.hg	CACHD1	6.57502	0.765956	2.59005	-1.53071	0.626434	13.4718	0 .	1 x 16	1 p31	cache domain containing 1
TC0X001366.hg	180	TC0X001366.hg		5.71405	0.745096	2.58756	-0.944297	0.425263	7.87641	3.70814490224802e-14 .	1 x 17	X q26	firre intergenic repeating RNA element
TC04000358.hg	181	TC04000358.hg		3.71241	0.752735	2.58586	-0.9558	0.702102	16.5283	0 .	1 x 16	4 q13	novel transcript
TC16001289.hg	182	TC16001289.hg		8.4128	0.632836	2.57721	-1.23697	0.552157	11.1016	0 .	1 x 16
TC02003700.hg	183	TC02003700.hg		4.49049	0.67863	2.57088	-0.674569	0.595302	12.4195	0 .	1 x 15	2 q31	novel transcript, antisense to WIPF1 and CHRNA1
TC07001579.hg	184	TC07001579.hg	ABCB1	6.96728	1.10246	2.56765	-2.59108	0.530095	10.4795	0 .	1 x 17	7 q21	ATP binding cassette subfamily B member 1
TC0Y000238.hg	185	TC0Y000238.hg		3.6778	0.558951	2.55549	-0.804769	0.751514	19.0956	0 .	1 x 16	Y p11	novel transcript, sense intronic to TBL1Y
TC05000688.hg	186	TC05000688.hg		8.5352	0.624334	2.55444	-1.53329	0.642127	14.0412	0 .	1 x 16
TC05001216.hg	187	TC05001216.hg	CDH9	3.05486	0.509013	2.5459	-0.409933	0.785487	21.2759	0 .	1 x 16	5 p14	cadherin 9
TC0X002229.hg	188	TC0X002229.hg		4.75356	0.676984	2.54572	-0.928358	0.415685	7.66145	1.49658063719471e-13 .	1 x 17	X q26	firre intergenic repeating RNA element
TC03003114.hg	189	TC03003114.hg	RBP1	7.81693	0.867134	2.54487	-1.56951	0.555761	11.2063	0 .	1 x 16	3 q23	retinol binding protein 1
TC13000039.hg	190	TC13000039.hg		4.69836	0.711453	2.53981	-1.05095	0.630206	13.6061	0 .	1 x 15	13 q12	long intergenic non-protein coding RNA 540
TC09002563.hg	191	TC09002563.hg	PGM5	5.11824	0.720667	2.53438	-1.11356	0.647471	14.2419	0 .	1 x 16	9 p11	phosphoglucomutase 5 pseudogene 2
TC16001902.hg	192	TC16001902.hg	CRNDE	6.11855	0.647976	2.53145	-1.01182	0.625108	13.425	0 .	1 x 16	16 q12	colorectal neoplasia differentially expressed
TC0Y000189.hg	193	TC0Y000189.hg		2.99077	0.812743	2.51375	-1.17995	0.549962	11.0383	0 .	1 x 16	Y q11	RNA binding motif protein Y-linked family 2 member E, pseudogene
TC01001053.hg	194	TC01001053.hg	EMB	6.08121	0.908871	2.50122	-2.09751	0.485138	9.30014	0 .	1 x 17	1 p11	embigin pseudogene 1
TC19000163.hg	195	TC19000163.hg		9.9151	0.560371	2.49409	-1.06307	0.643845	14.1054	0 .	1 x 16
TC04002048.hg	196	TC04002048.hg		3.51226	0.768105	2.48233	-0.987011	0.698012	16.3399	0 .	1 x 16	4 q13	novel transcript
TC0Y000353.hg	197	TC0Y000353.hg		6.11658	1.04688	2.46221	-1.52338	0.305715	5.38242	7.75896826787914e-08 .	1 x 17	Y q11	taxilin gamma pseudogene, Y-linked
TC12002285.hg	198	TC12002285.hg	ETNK1	7.95136	0.675731	2.46137	-2.22313	0.677623	15.4459	0 .	1 x 17	12 p12	ethanolamine kinase 1
TC20000719.hg	199	TC20000719.hg	CST2	6.97734	0.623602	2.45917	-1.14839	0.419902	7.7557	8.1379347705024e-14 .	1 x 14	20 p11	cystatin SA
TC07001798.hg	200	TC07001798.hg	CTTNBP2	5.72039	0.77472	2.45538	-1.18687	0.724925	17.6415	0 .	1 x 16	7 q31	cortactin binding protein 2
TC21000138.hg	201	TC21000138.hg	CLIC6	5.84187	0.733849	2.45505	-1.13111	0.548272	10.9897	0 .	1 x 17	21 q22	chloride intracellular channel 6
TC02001040.hg	202	TC02001040.hg		4.878	0.600593	2.45248	-0.565276	0.591431	12.295	0 .	1 x 15	2 q31	novel transcript, antisense to WIPF1 and CHRNA1
TC01003822.hg	203	TC01003822.hg		3.90823	0.468794	2.45193	-0.621564	0.702389	16.5416	0 .	1 x 15
TC01001251.hg	204	TC01001251.hg	PRR9	3.83695	0.555368	2.43776	-0.952391	0.62932	13.5744	0 .	1 x 15	1 q21	proline rich 9
TC07002464.hg	205	TC07002464.hg	PPP1R9A	4.28739	0.973093	2.43224	-1.69582	0.512675	10.0095	0 .	1 x 17	7 q21	protein phosphatase 1 regulatory subunit 9A
TC09001814.hg	206	TC09001814.hg		4.01708	0.555968	2.41872	-0.751538	0.571024	11.66	0 .	1 x 14	9 p24	novel transcript
TC12001111.hg	207	TC12001111.hg		8.64518	0.670127	2.41032	-1.36567	0.658309	14.66	0 .	1 x 16
TC12001449.hg	208	TC12001449.hg		6.8083	0.739218	2.41025	-1.36756	0.580913	11.9635	0 .	1 x 16	12 q13	novel transcript, antisense to C12orf54
TC05000791.hg	209	TC05000791.hg	KCTD16	3.9268	0.551258	2.40971	-0.614367	0.807932	22.9832	0 .	1 x 16	5 q31	potassium channel tetramerization domain containing 16
TC12000231.hg	210	TC12000231.hg		8.96844	0.526039	2.37162	-0.99217	0.624035	13.3872	0 .	2 x 16
TC02001049.hg	211	TC02001049.hg	HOXD13	5.47506	0.616554	2.3694	-0.858674	0.588781	12.2106	0 .	1 x 14	2 q31	homeobox D13
TC02004598.hg	212	TC02004598.hg	NCKAP5	6.25488	0.688779	2.36588	-0.995536	0.791836	21.7338	0 .	1 x 16	2 q21	NCK associated protein 5
TC02002428.hg	213	TC02002428.hg	NEB	5.06704	0.631149	2.36558	-0.896879	0.452128	8.49714	5.55111512312578e-16 .	2 x 17	2 q23	nebulin
TC10000439.hg	214	TC10000439.hg		9.07083	0.589472	2.36145	-1.12431	0.662354	14.8201	0 .	1 x 16
TC03001259.hg	215	TC03001259.hg		4.70696	0.641474	2.36134	-1.02734	0.624633	13.4083	0 .	1 x 16	3 p24	long intergenic non-protein coding RNA 1967
TC02005049.hg	216	TC02005049.hg	CERKL	3.70115	0.496239	2.34898	-0.575988	0.638065	13.8911	0 .	1 x 15	2 q31	ceramide kinase like
TC20000072.hg	217	TC20000072.hg	PLCB1	6.92296	0.831233	2.33967	-1.66369	0.547154	10.9577	0 .	1 x 16	20 p12	phospholipase C beta 1
TC01001609.hg	218	TC01001609.hg		4.25894	0.446752	2.33939	-0.70761	0.693592	16.14	0 .	2 x 15	1 q31	endogenous retrovirus group MER61 member 1
TC12002601.hg	219	TC12002601.hg		4.47372	0.459085	2.33331	-0.70518	0.634672	13.7672	0 .	2 x 15
TC0Y000329.hg	220	TC0Y000329.hg		3.27399	0.740001	2.32616	-1.03113	0.550364	11.0498	0 .	1 x 15	Y q11	RNA binding motif protein Y-linked family 2 member E, pseudogene
TC02004517.hg	221	TC02004517.hg	ACR	5.92596	0.602043	2.31729	-1.01943	0.704754	16.652	0 .	1 x 15	2 q14	acrosin (ACR) pseudogene
TC02000955.hg	222	TC02000955.hg		5.74609	0.640543	2.29857	-1.0484	0.659795	14.7186	0 .	1 x 16
TC09000048.hg	223	TC09000048.hg		5.66505	0.581217	2.28099	-0.957406	0.599471	12.555	0 .	1 x 15	9 p24	novel transcript
TC01004595.hg	224	TC01004595.hg		3.55931	0.508984	2.26558	-0.569784	0.638118	13.893	0 .	1 x 15	1 p13	SLC25A24 pseudogene 1
TC06000933.hg	225	TC06000933.hg	SLC35F1	4.88125	0.431786	2.25433	-0.594868	0.701017	16.478	0 .	2 x 15	6 q22	solute carrier family 35 member F1
TC04000508.hg	226	TC04000508.hg		8.01792	0.55132	2.25428	-0.980773	0.559024	11.3019	0 .	2 x 16
TC17000557.hg	227	TC17000557.hg		3.11247	0.466596	2.2485	-0.86326	0.621009	13.2814	0 .	2 x 15
TC12000239.hg	228	TC12000239.hg	ETNK1	7.56148	0.561365	2.24107	-1.80509	0.662504	14.8261	0 .	1 x 17	12 p12	ethanolamine kinase 1
TC03000629.hg	229	TC03000629.hg		6.49536	0.555371	2.21056	-1.11295	0.634187	13.7496	0 .	1 x 16
TC04002657.hg	230	TC04002657.hg	CXXC4	4.96912	0.762261	2.20831	-1.21085	0.682586	15.657	0 .	1 x 16	4 q24	CXXC finger protein 4
TC13000790.hg	231	TC13000790.hg	DCT	3.64334	0.438725	2.20021	-0.464163	0.679562	15.5279	0 .	2 x 15	13 q32	dopachrome tautomerase
TC16001308.hg	232	TC16001308.hg	HSDL1	7.04298	0.592846	2.19505	-1.27853	0.758479	19.5097	0 .	1 x 17	16 q24	hydroxysteroid dehydrogenase like 1
TC04001459.hg	233	TC04001459.hg	LEF1	6.38525	0.703493	2.19006	-1.21317	0.679695	15.5335	0 .	1 x 16	4 q25	lymphoid enhancer binding factor 1
TC16001288.hg	234	TC16001288.hg	ADAMTS18	4.82569	0.475931	2.18558	-0.490612	0.845879	26.5846	0 .	1 x 16	16 q23	ADAM metallopeptidase with thrombospondin type 1 motif 18
TC09000428.hg	235	TC09000428.hg	SYK	7.58494	0.660778	2.1805	-1.99301	0.66821	15.056	0 .	1 x 16	9 q22	spleen associated tyrosine kinase
TC06002303.hg	236	TC06002303.hg		5.93414	0.545367	2.17794	-1.24314	0.613332	13.0172	0 .	2 x 16
TC03000195.hg	237	TC03000195.hg		9.36245	0.527249	2.17357	-0.931057	0.616754	13.1342	0 .	2 x 16
TC02000738.hg	238	TC02000738.hg	DPP10	3.2446	0.570949	2.17073	-0.579946	0.560533	11.3463	0 .	1 x 15	2 q14	dipeptidyl peptidase like 10
TC02002228.hg	239	TC02002228.hg		6.13009	0.595867	2.16935	-1.18684	0.73463	18.1507	0 .	1 x 16	2 q14	novel transcript
TC01000291.hg	240	TC01000291.hg	EPHB2	5.50264	0.649026	2.16096	-1.14694	0.531542	10.5194	0 .	1 x 15	1 p36	EPH receptor B2
TC0Y000188.hg	241	TC0Y000188.hg		5.65699	0.59717	2.15293	-0.880193	0.557647	11.2614	0 .	1 x 14	Y q11	proline rich Y-linked
TC02003648.hg	242	TC02003648.hg		2.40214	0.455395	2.14958	-0.640912	0.720301	17.4068	0 .	1 x 16	2 q24	novel transcript
TC04001335.hg	243	TC04001335.hg	TMEM150C	7.21964	0.793705	2.1431	-1.55159	0.625862	13.4516	0 .	1 x 16	4 q21	transmembrane protein 150C
TC12000871.hg	244	TC12000871.hg	ALDH2	5.65442	0.724374	2.14064	-1.68508	0.560737	11.3523	0 .	1 x 17	12 q24	aldehyde dehydrogenase 2 family member
TC01004238.hg	245	TC01004238.hg	EPHB2	5.51457	0.644535	2.13801	-1.16406	0.530906	10.5019	0 .	1 x 15	1 p36	EPH receptor B2
TC09002809.hg	246	TC09002809.hg	CRAT	7.95186	0.633033	2.13699	-1.29907	0.581185	11.972	0 .	1 x 15	9 q34	carnitine O-acetyltransferase
TC17000813.hg	247	TC17000813.hg	KCNJ2	6.04675	0.622624	2.12236	-1.26357	0.634908	13.7758	0 .	1 x 17	17 q24	potassium inwardly rectifying channel subfamily J member 2
TC16000671.hg	248	TC16000671.hg	FOXL1	6.17858	0.461138	2.10258	-0.951097	0.688748	15.9248	0 .	2 x 16	16 q24	forkhead box L1
TC01006398.hg	249	TC01006398.hg	NBPF4	4.9142	0.415109	2.10023	-0.541591	0.621863	13.3112	0 .	2 x 15	1 p13	NBPF member 4
TC04000694.hg	250	TC04000694.hg		3.48354	0.468754	2.09845	-0.633189	0.684034	15.7194	0 .	1 x 15	4 q31	novel transcript
TC09001204.hg	251	TC09001204.hg	CEMIP2	8.81659	0.582858	2.08255	-1.55274	0.582124	12.0012	0 .	1 x 17	9 q21	cell migration inducing hyaluronidase 2
TC05001562.hg	252	TC05001562.hg		3.32178	0.616022	2.07104	-0.953844	0.66926	15.0988	0 .	1 x 16
TC16001980.hg	253	TC16001980.hg	CDYL2	4.99981	0.718088	2.06676	-1.81709	0.638307	13.9	0 .	1 x 16	16 q23	chromodomain Y like 2
TC19000623.hg	254	TC19000623.hg	IGSF23	5.49886	0.524863	2.06512	-0.858151	0.699583	16.4119	0 .	1 x 16	19 q13	immunoglobulin superfamily member 23
TC01006399.hg	255	TC01006399.hg	NBPF4	4.97377	0.43679	2.05643	-0.529896	0.683481	15.6955	0 .	2 x 15	1 p13	NBPF member 4
TC01001788.hg	256	TC01001788.hg	PROX1	7.76102	0.837824	2.05454	-2.50518	0.502896	9.75311	0 .	1 x 15	1 q32	prospero homeobox 1
TC01006397.hg	257	TC01006397.hg		4.4009	0.54385	2.05347	-0.929295	0.602123	12.642	0 .	1 x 15
TC07000565.hg	258	TC07000565.hg	PPP1R9A	5.82423	0.954679	2.04096	-1.50639	0.43942	8.20012	4.32986979603811e-15 .	1 x 17	7 q21	protein phosphatase 1 regulatory subunit 9A
TC05002560.hg	259	TC05002560.hg		2.75795	0.409044	2.04051	-0.772612	0.604188	12.7102	0 .	2 x 17
TC03001056.hg	260	TC03001056.hg		9.3153	0.540914	2.03802	-1.12791	0.618615	13.1984	0 .	1 x 16
TC0X001303.hg	261	TC0X001303.hg		4.43965	0.521025	2.0331	-0.655557	0.448073	8.40168	1.11022302462516e-15 .	2 x 17
TC19002057.hg	262	TC19002057.hg		3.27374	0.5226	2.02482	-0.935983	0.506915	9.85788	0 .	1 x 14
TC09000312.hg	263	TC09000312.hg	PGM5	5.25832	0.537969	2.0134	-0.790785	0.654395	14.5072	0 .	1 x 16	9 q21	phosphoglucomutase 5
TC01004597.hg	264	TC01004597.hg		5.34175	0.557464	2.00739	-0.902888	0.628234	13.5357	0 .	1 x 15	1 p13	novel transcript
TC17000153.hg	265	TC17000153.hg	SHISA6	5.85938	0.528242	1.99636	-0.755576	0.559396	11.3128	0 .	2 x 15	17 p12	shisa family member 6
TC16001685.hg	266	TC16001685.hg	FOXL1	3.12998	0.436932	1.99447	-0.765264	0.584372	12.0715	0 .	2 x 17	16 q24	forkhead box L1
TC15001330.hg	267	TC15001330.hg	MYEF2	5.75846	0.878864	1.97761	-1.68575	0.50649	9.84675	0 .	1 x 17	15 q21	myelin expression factor 2
TC12002360.hg	268	TC12002360.hg	SCN8A	4.31146	0.56282	1.96783	-1.12469	0.482503	9.23425	0 .	2 x 17	12 q13	sodium voltage-gated channel alpha subunit 8
TC22000191.hg	269	TC22000191.hg	KREMEN1	6.96859	0.580986	1.96235	-1.14565	0.507283	9.8675	0 .	1 x 14	22 q12	kringle containing transmembrane protein 1
TC01000930.hg	270	TC01000930.hg		6.09158	0.502819	1.95319	-0.86265	0.587915	12.1832	0 .	1 x 14	1 p13	novel transcript
TC01002944.hg	271	TC01002944.hg		6.09158	0.502819	1.95319	-0.86265	0.587915	12.1832	0 .	1 x 14	1 p13	novel transcript
TC16001429.hg	272	TC16001429.hg		6.00378	0.483531	1.95003	-0.872979	0.582576	12.0153	0 .	1 x 14
TC01001817.hg	273	TC01001817.hg	MARK1	5.36903	0.565353	1.94689	-0.908438	0.529057	10.451	0 .	1 x 17	1 q41	microtubule affinity regulating kinase 1
TC01000606.hg	274	TC01000606.hg	SLC5A9	5.60715	0.471656	1.94099	-0.674481	0.737006	18.2789	0 .	1 x 15	1 p33	solute carrier family 5 member 9
TC12003096.hg	275	TC12003096.hg	TBX3	7.69203	0.835468	1.92301	-2.31622	0.475308	9.05596	0 .	1 x 15	12 q24	T-box transcription factor 3
TC15002526.hg	276	TC15002526.hg	MYEF2	3.24134	0.533063	1.92215	-0.953335	0.55512	11.1876	0 .	2 x 16	15 q21	myelin expression factor 2
TC11001449.hg	277	TC11001449.hg		4.9397	0.549214	1.92094	-0.772605	0.65498	14.5299	0 .	1 x 17
TC04000052.hg	278	TC04000052.hg	ADRA2C	7.0304	0.42257	1.92014	-0.708323	0.724096	17.5991	0 .	2 x 15	4 p16	adrenoceptor alpha 2C
TC06001103.hg	279	TC06001103.hg	CCDC170	5.29502	0.416511	1.91573	-0.814232	0.623579	13.3712	0 .	2 x 17	6 q25	coiled-coil domain containing 170
TC12000633.hg	280	TC12000633.hg		5.38819	0.578915	1.91344	-0.989183	0.653627	14.4775	0 .	1 x 16
TC03000204.hg	281	TC03000204.hg	MYRIP	6.09252	0.542763	1.91025	-0.846557	0.653352	14.4668	0 .	1 x 17	3 p22	myosin VIIA and Rab interacting protein
TC0X001286.hg	282	TC0X001286.hg	AMOT	6.93792	0.729077	1.89729	-1.47759	0.522153	10.2631	0 .	1 x 14	X q23	angiomotin
TC02002842.hg	283	TC02002842.hg		2.48667	0.549508	1.89636	-0.954212	0.543657	10.8582	0 .	1 x 14	2 q36	long intergenic non-protein coding RNA 1807
TC20000490.hg	284	TC20000490.hg		6.35308	0.447514	1.88385	-0.767714	0.801335	22.4548	0 .	1 x 15	20 q13	novel transcript, antisense to RBBP8NL
TC07003132.hg	285	TC07003132.hg		3.70886	0.512197	1.87899	-0.973745	0.676755	15.4094	0 .	1 x 15
TC03001571.hg	286	TC03001571.hg		7.61003	0.46557	1.87185	-0.862959	0.620104	13.2499	0 .	2 x 15
TC17001968.hg	287	TC17001968.hg	NOTUM	7.64029	0.457849	1.86603	-0.741553	0.591137	12.2857	0 .	1 x 14	17 q25	notum, palmitoleoyl-protein carboxylesterase
TC09001643.hg	288	TC09001643.hg	CRAT	7.46906	0.542548	1.82622	-1.0384	0.584512	12.0759	0 .	1 x 15	9 q34	carnitine O-acetyltransferase
TC21000180.hg	289	TC21000180.hg	PCP4	5.20609	0.449572	1.82367	-0.663261	0.60106	12.6071	0 .	2 x 15	21 q22	Purkinje cell protein 4
TC0X000151.hg	290	TC0X000151.hg		4.92757	0.655041	1.801	-2.02358	0.467128	8.85613	0 .	2 x 16
TC06000609.hg	291	TC06000609.hg		5.15884	0.435313	1.79184	-0.801861	0.70424	16.6279	0 .	1 x 14
TC02002570.hg	292	TC02002570.hg	PDE11A	4.49461	0.464936	1.77606	-0.609065	0.797986	22.1955	0 .	1 x 15	2 q31	phosphodiesterase 11A
TC08002612.hg	293	TC08002612.hg	ENTPD4	7.40466	0.462952	1.76405	-0.969189	0.537203	10.6765	0 .	2 x 17	8 p21	ectonucleoside triphosphate diphosphohydrolase 4
TC03001358.hg	294	TC03001358.hg	LRRC2	5.62467	0.515234	1.76202	-0.914288	0.609436	12.8854	0 .	1 x 17	3 p21	leucine rich repeat containing 2
TC20000373.hg	295	TC20000373.hg		5.81631	0.526544	1.74724	-0.786924	0.553968	11.1541	0 .	2 x 16
TC0X000450.hg	296	TC0X000450.hg		6.73337	0.463898	1.69038	-1.00313	0.655963	14.5682	0 .	2 x 16
TC11000205.hg	297	TC11000205.hg	RASSF10	6.94173	0.485134	1.68267	-0.995013	0.658128	14.6529	0 .	1 x 14	11 p15	Ras association domain family member 10
TC03001834.hg	298	TC03001834.hg	RBP1	5.82619	0.495046	1.66931	-0.910169	0.622881	13.3468	0 .	2 x 16	3 q23	retinol binding protein 1
TC02001302.hg	299	TC02001302.hg	CTDSP1	6.48252	0.509315	1.61607	-1.19632	0.57032	11.6387	0 .	2 x 16	2 q35	CTD small phosphatase 1
TC11002650.hg	300	TC11002650.hg	PRDM11	5.38586	0.414846	1.60796	-0.62394	0.71054	16.927	0 .	1 x 17	11 p11	PR/SET domain 11
TC22000477.hg	301	TC22000477.hg		7.37773	0.481493	1.58499	-1.09509	0.71458	17.1231	0 .	1 x 17	22 q11	microRNA 3198-1
TC11000390.hg	302	TC11000390.hg	LARGE2	7.63584	0.47425	1.58382	-0.914114	0.732312	18.027	0 .	1 x 14	11 p11	LARGE xylosyl- and glucuronyltransferase 2
TC16001471.hg	303	TC16001471.hg	SBK1	5.80403	0.451789	1.57686	-0.729508	0.696573	16.2744	0 .	1 x 15	16 p12	SH3 domain binding kinase 1
TC14001600.hg	304	TC14001600.hg		4.35502	0.474864	1.5361	-0.846785	0.580353	11.9461	0 .	1 x 14
TC08001565.hg	305	TC08001565.hg	SNTB1	8.19741	0.559499	1.47058	-1.58983	0.464193	8.78513	0 .	1 x 14	8 q24	syntrophin beta 1
TC03001835.hg	306	TC03001835.hg	NMNAT3	5.86689	0.379304	1.46214	-0.647554	0.663052	14.848	0 .	1 x 14	3 q23	nicotinamide nucleotide adenylyltransferase 3
TC10001432.hg	307	TC10001432.hg		4.90905	0.447163	1.44179	-0.924711	0.615544	13.0927	0 .	2 x 15
TC04001440.hg	308	TC04001440.hg	CXXC4	4.38791	0.420188	1.43739	-0.791284	0.656934	14.6061	0 .	1 x 14	4 q24	CXXC finger protein 4
TC12002000.hg	309	TC12002000.hg	TBX3	7.05041	0.55824	1.38435	-1.19219	0.496907	9.59858	0 .	1 x 14	12 q24	T-box transcription factor 3
TC06000595.hg	310	TC06000595.hg	PTK7	7.17966	0.480818	1.34533	-1.12742	0.666753	14.9968	0 .	1 x 15	6 p21	protein tyrosine kinase 7 (inactive)
TC01001435.hg	311	TC01001435.hg		6.17565	0.446266	1.3366	-1.08619	0.542486	10.825	0 .	2 x 15
TC07001788.hg	312	TC07001788.hg		4.92486	0.5479	1.28021	-1.3693	0.512445	10.0034	0 .	2 x 16	7 q31

## Sheet: SpotC
	Rank	ID	Symbol	mean expression	SD	max delta e	min delta e	correlation	->t.score	->p.value	Metagene	Chromosome	Description
TC07001746.hg	1	TC07001746.hg	SLC26A3	5.81839	1.75462	6.22739	-2.47467	0.338269	6.02564	2.63529154054254e-09 .	1 x 44	7 q31	solute carrier family 26 member 3
TC11002314.hg	2	TC11002314.hg	NXPE4	5.27874	1.62423	5.05014	-1.88581	0.256055	4.4403	6.4623909461492e-06 .	1 x 44	11 q23	neurexophilin and PC-esterase domain family member 4
TC19001560.hg	3	TC19001560.hg	CEACAM7	6.43022	1.52601	5.00535	-2.39831	0.418688	7.72852	9.70334923522387e-14 .	1 x 43	19 q13	CEA cell adhesion molecule 7
TC13000228.hg	4	TC13000228.hg	OLFM4	8.26881	2.3777	4.76293	-3.68363	0.202652	3.46905	0.000302121002138778 .	1 x 45	13 q14	olfactomedin 4
TC11002313.hg	5	TC11002313.hg	NXPE1	4.77239	1.48238	4.6778	-1.67883	0.314183	5.54758	3.34479630659246e-08 .	1 x 43	11 q23	neurexophilin and PC-esterase domain family member 1
TC06000714.hg	6	TC06000714.hg		5.2816	1.79003	4.26496	-2.4197	0.312271	5.51016	4.05397989622358e-08 .	1 x 45	6 q13	novel transcript
TC12000062.hg	7	TC12000062.hg	RAD51AP1	5.6714	0.802992	4.21348	-1.77528	0.696511	16.2716	0 .	1 x 39	12 p13	RAD51 associated protein 1
TC14001248.hg	8	TC14001248.hg		5.89094	1.57716	4.05307	-2.89933	0.390799	7.11695	4.60897986442887e-12 .	1 x 45	14 q24	novel transcript, antisense to RAD51L1
TC11002876.hg	9	TC11002876.hg		4.58413	1.10513	3.90769	-1.62428	0.362288	6.51569	1.66733293838206e-10 .	1 x 44
TC06002860.hg	10	TC06002860.hg		5.38265	1.68305	3.88799	-2.40217	0.316583	5.59466	2.62223374125625e-08 .	1 x 45	6 q13	novel transcript
TC11002497.hg	11	TC11002497.hg	MUC5B	8.43356	1.55105	3.87399	-2.25087	0.240479	4.15303	2.17819493213423e-05 .	2 x 41	11 p15	mucin 5B, oligomeric mucus/gel-forming
TC11002498.hg	12	TC11002498.hg	MUC5B	8.89199	1.56914	3.8607	-2.40239	0.232894	4.01441	3.82562571218381e-05 .	2 x 41	11 p15	mucin 5B, oligomeric mucus/gel-forming
TC06000631.hg	13	TC06000631.hg	MEP1A	6.87656	1.58083	3.85806	-2.62848	0.493736	9.5175	0 .	2 x 45	6 p12	meprin A subunit alpha
TC11001728.hg	14	TC11001728.hg	LRP4	7.27898	0.988457	3.8453	-1.61155	0.464167	8.78451	0 .	2 x 41	11 p11	LDL receptor related protein 4
TC11001257.hg	15	TC11001257.hg		7.151	1.25213	3.76051	-1.76454	0.265336	4.61319	3.01618672060577e-06 .	3 x 41	11 p15	MUC5B antisense RNA 1
TC07001164.hg	16	TC07001164.hg	AGR3	4.68793	1.40008	3.55565	-2.17591	0.514666	10.0624	0 .	1 x 41	7 p21	anterior gradient 3, protein disulphide isomerase family member
TC09000985.hg	17	TC09000985.hg	LRRC19	5.87472	1.4998	3.45305	-2.95038	0.636447	13.8318	0 .	1 x 43	9 p21	leucine rich repeat containing 19
TC0X000878.hg	18	TC0X000878.hg	ACE2	6.09907	1.43759	3.4209	-2.64451	0.538169	10.7035	0 .	1 x 43	X p22	angiotensin I converting enzyme 2
TC04002303.hg	19	TC04002303.hg	SMIM31	5.77247	1.10448	3.41051	-2.09772	0.475033	9.04919	0 .	1 x 44	4 q32	small integral membrane protein 31
TC06003119.hg	20	TC06003119.hg	SAMD5	7.32095	1.42582	3.34736	-3.93482	0.480517	9.18479	0 .	1 x 42	6 q24	sterile alpha motif domain containing 5
TC04000414.hg	21	TC04000414.hg	EREG	7.39511	1.40402	3.33761	-2.75102	0.513235	10.0244	0 .	1 x 41	4 q13	epiregulin
TC02001364.hg	22	TC02001364.hg	CCL20	6.93602	1.27279	3.33724	-2.79679	0.500729	9.69697	0 .	1 x 41	2 q36	C-C motif chemokine ligand 20
TC13000904.hg	23	TC13000904.hg		5.57924	1.50725	3.3276	-3.10718	0.349542	6.25388	7.42605421599762e-10 .	1 x 44
TC16001565.hg	24	TC16001565.hg		5.76174	0.822806	3.29445	-1.76823	0.571632	11.6785	0 .	2 x 41	16 q12	novel transcript
TC04000821.hg	25	TC04000821.hg	SMIM31	4.78175	0.97833	3.29194	-1.82198	0.473385	9.00872	0 .	1 x 45	4 q32	small integral membrane protein 31
TC07002493.hg	26	TC07002493.hg	MUC3A	7.23043	1.1703	3.27232	-4.02173	0.297058	5.215	1.78522999050301e-07 .	1 x 45	7 q22	mucin 3A, cell surface associated
TC12001265.hg	27	TC12001265.hg	GRIN2B	6.34549	0.879177	3.23642	-1.82444	0.518607	10.1676	0 .	1 x 44	12 p13	glutamate ionotropic receptor NMDA type subunit 2B
TC04001267.hg	28	TC04001267.hg	SULT1B1	5.49849	1.06725	3.18324	-2.24687	0.416849	7.6874	1.26565424807268e-13 .	2 x 45	4 q13	sulfotransferase family 1B member 1
TC18000178.hg	29	TC18000178.hg	SKA1	5.43179	0.732329	3.16271	-1.19005	0.650562	14.3596	0 .	1 x 38	CHR_HSCHR18_1_CTG1_1 q21	spindle and kinetochore associated complex subunit 1
TC02000628.hg	30	TC02000628.hg	SLC9A2	5.11621	1.06213	3.12573	-1.58611	0.441256	8.24266	3.33066907387547e-15 .	1 x 41	2 q12	solute carrier family 9 member A2
TC12000624.hg	31	TC12000624.hg	LGR5	8.46475	1.7534	3.10598	-4.34545	0.593759	12.3697	0 .	1 x 45	12 q21	leucine rich repeat containing G protein-coupled receptor 5
TC01000939.hg	32	TC01000939.hg	KIAA1324	7.36838	1.32767	3.09341	-2.16201	0.567382	11.5502	0 .	1 x 40	1 p13	KIAA1324
TC07000639.hg	33	TC07000639.hg	MUC12	7.53159	1.28261	3.07437	-2.10352	0.383556	6.96204	1.18567378137868e-11 .	1 x 44	7 q22	mucin 12, cell surface associated
TC07003151.hg	34	TC07003151.hg	GRM8	6.45912	1.4194	3.07168	-2.62145	0.337185	6.00385	2.96880342531836e-09 .	1 x 45	7 q31	glutamate metabotropic receptor 8
TC04000768.hg	35	TC04000768.hg	FHDC1	6.24116	0.807382	3.06574	-1.81528	0.643914	14.108	0 .	2 x 42	4 q31	FH2 domain containing 1
TC06001355.hg	36	TC06001355.hg	H4C8	6.20689	0.844813	3.06368	-2.184	0.552926	11.1238	0 .	1 x 39	6 p22	H4 clustered histone 8
TC07001163.hg	37	TC07001163.hg		5.69286	0.99301	3.05443	-2.21257	0.715429	17.1648	0 .	1 x 42
TC07002857.hg	38	TC07002857.hg	HOXA13	5.66647	1.10884	3.04352	-2.72135	0.523306	10.2943	0 .	1 x 44	7 p15	homeobox A13
TC03000545.hg	39	TC03000545.hg	HHLA2	5.66329	1.16336	3.03347	-2.07258	0.568179	11.5741	0 .	1 x 42	3 q13	HERV-H LTR-associating 2
TC01005141.hg	40	TC01005141.hg	CHRM3	5.69684	1.2788	3.02474	-3.61597	0.449653	8.4388	8.88178419700125e-16 .	1 x 45	1 q43	cholinergic receptor muscarinic 3
TC07001227.hg	41	TC07001227.hg	HOXA13	6.18533	1.09865	3.0103	-2.55057	0.535956	10.6418	0 .	1 x 44	7 p15	homeobox A13
TC09002547.hg	42	TC09002547.hg		7.69007	1.76261	2.98952	-4.3837	0.400071	7.31753	1.32882593817385e-12 .	1 x 44
TC01002338.hg	43	TC01002338.hg	HTR1D	5.01926	1.21604	2.98528	-2.15249	0.425213	7.87529	3.73034936274053e-14 .	2 x 45	1 p36	5-hydroxytryptamine receptor 1D
TC04001570.hg	44	TC04001570.hg	SLC7A11	6.80185	1.00886	2.9491	-2.63881	0.56927	11.607	0 .	1 x 43	4 q28	solute carrier family 7 member 11
TC03000352.hg	45	TC03000352.hg	IL17RB	6.77967	0.728008	2.9405	-1.87583	0.542675	10.8304	0 .	3 x 40	3 p21	interleukin 17 receptor B
TC0X001211.hg	46	TC0X001211.hg	NOX1	8.18272	1.86788	2.91699	-4.82413	0.595995	12.4419	0 .	1 x 44	X q22	NADPH oxidase 1
TC20000076.hg	47	TC20000076.hg	PLCB4	8.3924	1.7588	2.91364	-4.02925	0.450503	8.45879	7.7715611723761e-16 .	1 x 45	20 p12	phospholipase C beta 4
TC10001324.hg	48	TC10001324.hg	RTKN2	5.2868	0.674555	2.91158	-1.55292	0.58944	12.2316	0 .	1 x 38	10 q21	rhotekin 2
TC01004601.hg	49	TC01004601.hg	KIAA1324	6.93437	1.13317	2.88633	-2.11103	0.520753	10.2253	0 .	1 x 39	1 p13	KIAA1324
TC04001193.hg	50	TC04001193.hg	LRRC66	5.26514	0.876226	2.86275	-1.97355	0.54574	10.9174	0 .	1 x 45	4 q12	leucine rich repeat containing 66
TC07000902.hg	51	TC07000902.hg	MGAM2	6.86399	1.53982	2.86136	-3.05707	0.481262	9.20332	0 .	1 x 45	7 q34	maltase-glucoamylase 2 (putative)
TC09001154.hg	52	TC09001154.hg		7.62595	1.68007	2.84937	-4.1341	0.40119	7.34193	1.14053211319742e-12 .	1 x 44
TC07002629.hg	53	TC07002629.hg	MGAM2	7.06944	1.642	2.8452	-3.39847	0.482021	9.22222	0 .	1 x 45	7 q34	maltase-glucoamylase 2 (putative)
TC07002628.hg	54	TC07002628.hg	MGAM2	6.75728	1.47387	2.81419	-2.82049	0.481885	9.21885	0 .	1 x 45	7 q34	maltase-glucoamylase 2 (putative)
TC08001626.hg	55	TC08001626.hg		6.06136	1.01126	2.79557	-2.15643	0.577163	11.8475	0 .	1 x 41	8 q24	cancer susceptibility 19
TC17001473.hg	56	TC17001473.hg	KRT20	8.54792	1.72645	2.79275	-4.81819	0.637802	13.8815	0 .	1 x 43	CHR_HSCHR17_4_CTG4 q21	keratin 20
TC17000495.hg	57	TC17000495.hg	CDC6	6.21844	0.818297	2.78448	-1.7466	0.792395	21.7751	0 .	1 x 40	17 q21	cell division cycle 6
TC06001072.hg	58	TC06001072.hg	SAMD5	7.10366	0.942295	2.7558	-2.33389	0.45637	8.5977	2.22044604925031e-16 .	3 x 41	6 q24	sterile alpha motif domain containing 5
TC18000009.hg	59	TC18000009.hg	NDC80	5.87796	0.881308	2.73485	-1.95675	0.758888	19.5345	0 .	1 x 39	18 p11	NDC80 kinetochore complex component
TC04002940.hg	60	TC04002940.hg	PROM1	7.29057	1.32491	2.72636	-2.72325	0.440679	8.22928	3.5527136788005e-15 .	2 x 45	4 p15	prominin 1
TC02002217.hg	61	TC02002217.hg	CKAP2L	6.03505	0.827867	2.71093	-2.1493	0.846571	26.6612	0 .	1 x 39	2 q14	cytoskeleton associated protein 2 like
TC05001911.hg	62	TC05001911.hg	SPINK1	7.87764	1.24671	2.70349	-2.80835	0.504886	9.80487	0 .	1 x 42	5 q32	serine peptidase inhibitor, Kazal type 1
TC18000507.hg	63	TC18000507.hg	MYO5B	8.15717	0.843134	2.69115	-3.09149	0.844575	26.4413	0 .	1 x 43	18 q21	myosin VB
TC6_apd_hap1000067.hg	64	TC6_apd_hap1000067.hg	TRIM31	7.55184	1.35565	2.68843	-3.33988	0.681589	15.6143	0 .	1 x 43	6 p22	tripartite motif containing 31
TC02003056.hg	65	TC02003056.hg	LRATD1	5.96655	1.06145	2.68685	-2.95108	0.699005	16.3854	0 .	1 x 45	2 p24	LRAT domain containing 1
TC16001335.hg	66	TC16001335.hg	SLC7A5	8.38541	0.837905	2.68527	-2.01382	0.599494	12.5557	0 .	1 x 39	16 q24	solute carrier family 7 member 5
TC10000592.hg	67	TC10000592.hg	C10orf99	7.21316	1.23762	2.68164	-2.31212	0.582195	12.0034	0 .	1 x 43	10 q23	chromosome 10 open reading frame 99
TC12001163.hg	68	TC12001163.hg	APOBEC1	5.64275	0.79831	2.67007	-1.69705	0.544167	10.8726	0 .	1 x 43	12 p13	apolipoprotein B mRNA editing enzyme catalytic subunit 1
TC16001115.hg	69	TC16001115.hg	TOX3	8.24054	0.978093	2.65345	-3.35087	0.803165	22.599	0 .	1 x 44	16 q12	TOX high mobility group box family member 3
TC20001194.hg	70	TC20001194.hg	DNMT3B	4.64213	0.717062	2.65322	-1.22102	0.494717	9.54251	0 .	1 x 38	20 q11	DNA methyltransferase 3 beta
TC04002953.hg	71	TC04002953.hg	AREG	7.67234	1.25052	2.64021	-3.41729	0.515462	10.0835	0 .	1 x 41	4 q13	amphiregulin
TC15002176.hg	72	TC15002176.hg	CKMT1B	7.73105	1.32785	2.63859	-4.09559	0.790572	21.6412	0 .	1 x 43	15 q15	creatine kinase, mitochondrial 1B
TC04002952.hg	73	TC04002952.hg	AREG	7.86912	1.24423	2.63658	-3.52726	0.51557	10.0864	0 .	1 x 41	4 q13	amphiregulin
TC11003088.hg	74	TC11003088.hg		4.93063	1.22486	2.61816	-2.17752	0.474026	9.02444	0 .	1 x 42	11 p14	BBOX1 antisense RNA 1
TC05001393.hg	75	TC05001393.hg	ELOVL7	6.05562	0.707811	2.61583	-1.42079	0.55913	11.305	0 .	2 x 40	5 q12	ELOVL fatty acid elongase 7
TC15001541.hg	76	TC15001541.hg	CA12	7.45846	0.939974	2.61459	-1.88015	0.392063	7.14415	3.89888121787862e-12 .	3 x 40	15 q22	carbonic anhydrase 12
TC12002956.hg	77	TC12002956.hg	PTPRR	5.38299	0.978555	2.61202	-1.70483	0.382272	6.93473	1.39853684189006e-11 .	1 x 44	12 q15	protein tyrosine phosphatase receptor type R
TC01005719.hg	78	TC01005719.hg	BCL2L15	6.89597	1.16602	2.60221	-3.48922	0.69448	16.1799	0 .	1 x 43	1 p13	BCL2 like 15
TC01006300.hg	79	TC01006300.hg	STIL	6.49888	0.904772	2.59928	-2.30128	0.839339	25.8824	0 .	1 x 40	1 p33	STIL centriolar assembly protein
TC08001627.hg	80	TC08001627.hg		7.5992	1.23081	2.59671	-3.47315	0.624922	13.4184	0 .	1 x 42	8 q24	cancer susceptibility 19
TC08002289.hg	81	TC08002289.hg		6.70335	1.08749	2.56915	-3.16396	0.742226	18.5659	0 .	1 x 44	8 p11	novel transcript
TC02000954.hg	82	TC02000954.hg	GALNT5	6.67795	0.934319	2.56696	-2.52848	0.550838	11.0635	0 .	1 x 43	2 q24	polypeptide N-acetylgalactosaminyltransferase 5
TC06003087.hg	83	TC06003087.hg	ARFGEF3	6.58453	1.09288	2.56686	-3.61745	0.770736	20.2775	0 .	1 x 45	6 q23	ARFGEF family member 3
TC6_qbl_hap6000121.hg	84	TC6_qbl_hap6000121.hg	TRIM31	6.99992	1.15833	2.56271	-2.7509	0.668625	15.0729	0 .	1 x 43	6 p22	tripartite motif containing 31
TC01003679.hg	85	TC01003679.hg	KIF14	5.53785	0.916413	2.54085	-2.3214	0.805427	22.7797	0 .	1 x 40	1 q32	kinesin family member 14
TC6_dbb_hap3000120.hg	86	TC6_dbb_hap3000120.hg	TRIM31	7.00331	1.14406	2.53859	-2.65519	0.664384	14.9013	0 .	1 x 43	6 p22	tripartite motif containing 31
TC07000645.hg	87	TC07000645.hg	AP1S1	5.58649	0.884926	2.53617	-2.25525	0.491218	9.45346	0 .	1 x 45	7 q22	adaptor related protein complex 1 subunit sigma 1
TC6_mann_hap4000109.hg	88	TC6_mann_hap4000109.hg	TRIM31	7.09752	1.15378	2.53166	-2.661	0.668419	15.0645	0 .	1 x 43	6 p22	tripartite motif containing 31
TC6_ssto_hap7000112.hg	89	TC6_ssto_hap7000112.hg	TRIM31	7.06117	1.14984	2.53085	-2.64503	0.666946	15.0046	0 .	1 x 43	6 p22	tripartite motif containing 31
TC01005139.hg	90	TC01005139.hg	CHRM3	6.17669	0.962019	2.5284	-2.29447	0.485302	9.30425	0 .	1 x 45	1 q43	cholinergic receptor muscarinic 3
TC14001155.hg	91	TC14001155.hg	DLGAP5	6.72855	0.938325	2.51779	-2.43528	0.836969	25.6375	0 .	1 x 39	14 q22	DLG associated protein 5
TC07000726.hg	92	TC07000726.hg	CFTR	8.21432	1.30941	2.51414	-4.04935	0.653522	14.4734	0 .	1 x 44	7 q31	CF transmembrane conductance regulator
TC6_mcf_hap5000111.hg	93	TC6_mcf_hap5000111.hg	TRIM31	6.88425	1.14462	2.51309	-2.62588	0.66681	14.9991	0 .	1 x 43	6 p22	tripartite motif containing 31
TC10002227.hg	94	TC10002227.hg	HELLS	4.66221	0.841417	2.50665	-1.74443	0.732708	18.048	0 .	1 x 39	10 q23	helicase, lymphoid specific
TC09000358.hg	95	TC09000358.hg	PSAT1	7.62612	1.07832	2.50454	-2.66827	0.482187	9.22637	0 .	1 x 38	9 q21	phosphoserine aminotransferase 1
TC06001495.hg	96	TC06001495.hg	TRIM31	6.66108	1.16331	2.49981	-2.74543	0.666066	14.969	0 .	1 x 43	6 p22	tripartite motif containing 31
TC08001132.hg	97	TC08001132.hg		7.04681	1.00533	2.49969	-3.03391	0.715027	17.145	0 .	1 x 44	8 p11	novel transcript
TC16000540.hg	98	TC16000540.hg	HSD11B2	7.38838	0.702849	2.47804	-1.83847	0.5997	12.5625	0 .	2 x 45	16 q22	hydroxysteroid 11-beta dehydrogenase 2
TC18000006.hg	99	TC18000006.hg	TYMS	7.51298	0.623466	2.47341	-1.31804	0.663075	14.8489	0 .	1 x 38	18 p11	thymidylate synthetase
TC06001342.hg	100	TC06001342.hg	H3C2	6.66355	0.915025	2.4727	-2.10886	0.781776	21.0163	0 .	1 x 39	6 p22	H3 clustered histone 2
TC6_cox_hap2000131.hg	101	TC6_cox_hap2000131.hg	TRIM31	6.94986	1.12736	2.46786	-2.61488	0.660466	14.7451	0 .	1 x 43	6 p22	tripartite motif containing 31
TC01003007.hg	102	TC01003007.hg	BCL2L15	6.66813	1.11866	2.44875	-3.07069	0.679226	15.5136	0 .	1 x 43	1 p13	BCL2 like 15
TC17000718.hg	103	TC17000718.hg	PRR11	6.66439	0.81003	2.4456	-2.18535	0.830529	24.9961	0 .	1 x 39	17 q22	proline rich 11
TC03002223.hg	104	TC03002223.hg		5.81663	0.814813	2.44175	-2.12798	0.544562	10.8839	0 .	3 x 41
TC08001086.hg	105	TC08001086.hg	PBK	5.4961	0.765779	2.4272	-1.69506	0.70441	16.6359	0 .	1 x 39	8 p21	PDZ binding kinase
TC07001373.hg	106	TC07001373.hg	DDC	6.90465	0.637649	2.41711	-1.52076	0.624891	13.4174	0 .	3 x 40	7 p12	dopa decarboxylase
TC04002072.hg	107	TC04002072.hg	PARM1	6.6332	1.263	2.40853	-3.47836	0.43374	8.06938	1.04360964314765e-14 .	1 x 45	4 q13	prostate androgen-regulated mucin-like protein 1
TC01005765.hg	108	TC01005765.hg	FAM72B	6.40221	0.887781	2.40522	-2.72052	0.764703	19.8931	0 .	1 x 39	1 p11	family with sequence similarity 72 member B
TC20000871.hg	109	TC20000871.hg	TOMM34	8.15541	0.838403	2.40029	-2.18042	0.764565	19.8844	0 .	1 x 40	20 q13	translocase of outer mitochondrial membrane 34
TC15000769.hg	110	TC15000769.hg		5.60339	0.991346	2.39782	-3.83735	0.605614	12.7576	0 .	1 x 43	15 q25	GOLGA2 pseudogene 7
TC15000782.hg	111	TC15000782.hg		5.60339	0.991346	2.39782	-3.83735	0.605614	12.7576	0 .	1 x 43	15 q25	GOLGA2 pseudogene 7
TC15000804.hg	112	TC15000804.hg		5.60339	0.991346	2.39782	-3.83735	0.605614	12.7576	0 .	1 x 43	15 q25	GOLGA2 pseudogene 7
TC15001780.hg	113	TC15001780.hg		5.60339	0.991346	2.39782	-3.83735	0.605614	12.7576	0 .	1 x 43	15 q25	GOLGA2 pseudogene 7
TC01002246.hg	114	TC01002246.hg	AGMAT	7.40925	0.827435	2.39539	-2.33652	0.51351	10.0317	0 .	2 x 38	1 p36	agmatinase
TC0Y000084.hg	115	TC0Y000084.hg		8.10081	0.998112	2.38141	-4.05561	0.730393	17.9255	0 .	1 x 43	CHR_HSCHR15_5_CTG8 q25	GOLGA2 pseudogene 10
TC0Y000221.hg	116	TC0Y000221.hg		8.10081	0.998112	2.38141	-4.05561	0.730393	17.9255	0 .	1 x 43	CHR_HSCHR15_5_CTG8 q25	GOLGA2 pseudogene 10
TC15000768.hg	117	TC15000768.hg		8.10081	0.998112	2.38141	-4.05561	0.730393	17.9255	0 .	1 x 43	CHR_HSCHR15_5_CTG8 q25	GOLGA2 pseudogene 10
TC15000775.hg	118	TC15000775.hg		8.10081	0.998112	2.38141	-4.05561	0.730393	17.9255	0 .	1 x 43	CHR_HSCHR15_5_CTG8 q25	GOLGA2 pseudogene 10
TC15000781.hg	119	TC15000781.hg		8.10081	0.998112	2.38141	-4.05561	0.730393	17.9255	0 .	1 x 43	CHR_HSCHR15_5_CTG8 q25	GOLGA2 pseudogene 10
TC15000788.hg	120	TC15000788.hg		8.10081	0.998112	2.38141	-4.05561	0.730393	17.9255	0 .	1 x 43	CHR_HSCHR15_5_CTG8 q25	GOLGA2 pseudogene 10
TC15000803.hg	121	TC15000803.hg		8.10081	0.998112	2.38141	-4.05561	0.730393	17.9255	0 .	1 x 43	CHR_HSCHR15_5_CTG8 q25	GOLGA2 pseudogene 10
TC15001749.hg	122	TC15001749.hg		8.10081	0.998112	2.38141	-4.05561	0.730393	17.9255	0 .	1 x 43	CHR_HSCHR15_5_CTG8 q25	GOLGA2 pseudogene 10
TC15001779.hg	123	TC15001779.hg		8.10081	0.998112	2.38141	-4.05561	0.730393	17.9255	0 .	1 x 43	CHR_HSCHR15_5_CTG8 q25	GOLGA2 pseudogene 10
TC15001781.hg	124	TC15001781.hg		8.10081	0.998112	2.38141	-4.05561	0.730393	17.9255	0 .	1 x 43	CHR_HSCHR15_5_CTG8 q25	GOLGA2 pseudogene 10
TC13000468.hg	125	TC13000468.hg	SKA3	6.53317	0.925935	2.38032	-2.55344	0.864762	28.8661	0 .	1 x 40	13 q12	spindle and kinetochore associated complex subunit 3
TC20000198.hg	126	TC20000198.hg	TPX2	8.6072	1.11949	2.37494	-3.24649	0.911154	37.0662	0 .	1 x 40	20 q11	TPX2 microtubule nucleation factor
TC16001530.hg	127	TC16001530.hg	ORC6	6.19875	0.536249	2.36918	-1.35827	0.758175	19.4913	0 .	1 x 38	16 q11	origin recognition complex subunit 6
TC04001280.hg	128	TC04001280.hg	RASSF6	5.98518	0.688245	2.36689	-1.63484	0.552466	11.1105	0 .	2 x 45	4 q13	Ras association domain family member 6
TC22001077.hg	129	TC22001077.hg	SLC5A1	7.60265	0.911719	2.36462	-2.34299	0.633762	13.7342	0 .	1 x 45	22 q12	solute carrier family 5 member 1
TC22000237.hg	130	TC22000237.hg	SLC5A1	7.36046	0.916895	2.36176	-2.57942	0.637832	13.8826	0 .	1 x 45	22 q12	solute carrier family 5 member 1
TC20000320.hg	131	TC20000320.hg	MYBL2	8.06163	0.749713	2.35319	-1.52607	0.743966	18.6633	0 .	1 x 39	20 q13	MYB proto-oncogene like 2
TC01001964.hg	132	TC01001964.hg		5.91861	0.803549	2.33965	-1.63827	0.475356	9.05715	0 .	2 x 45
TC13000270.hg	133	TC13000270.hg	BORA	6.09884	0.772287	2.3287	-2.07205	0.753176	19.193	0 .	1 x 40	13 q21	BORA aurora kinase A activator
TC06001427.hg	134	TC06001427.hg	H3C11	8.53748	1.12881	2.32778	-3.09536	0.496897	9.59831	0 .	1 x 39	6 p22	H3 clustered histone 11
TC01000727.hg	135	TC01000727.hg	RAVER2	7.1604	0.75701	2.32751	-2.07109	0.745394	18.7438	0 .	1 x 41	1 p31	ribonucleoprotein, PTB binding 2
TC13000860.hg	136	TC13000860.hg	EFNB2	8.2266	0.86953	2.32713	-2.46235	0.553666	11.1453	0 .	1 x 45	13 q33	ephrin B2
TC06000675.hg	137	TC06000675.hg	FAM83B	8.35523	1.27953	2.31575	-4.39296	0.888245	32.4134	0 .	1 x 43	6 p12	family with sequence similarity 83 member B
TC14000316.hg	138	TC14000316.hg	CDKN3	6.07258	0.809084	2.31393	-2.13789	0.799066	22.2785	0 .	1 x 39	14 q22	cyclin dependent kinase inhibitor 3
TC11001517.hg	139	TC11001517.hg	KIF18A	5.55018	0.928999	2.30895	-2.20803	0.83029	24.9729	0 .	1 x 39	11 p14	kinesin family member 18A
TC07001045.hg	140	TC07001045.hg	LOC389602	7.16461	0.954097	2.29102	-3.38688	0.64286	14.0686	0 .	1 x 44	7 q36	uncharacterized LOC389602
TC03003365.hg	141	TC03003365.hg	MUC20	8.62697	0.876628	2.28415	-2.24013	0.519844	10.2008	0 .	1 x 44	3 q29	mucin 20, cell surface associated
TC15000732.hg	142	TC15000732.hg	CHRNA5	5.37794	0.740319	2.28359	-1.60297	0.673261	15.2635	0 .	1 x 40	15 q25	cholinergic receptor nicotinic alpha 5 subunit
TC12001106.hg	143	TC12001106.hg	FOXM1	7.4115	0.801706	2.28075	-1.9829	0.830082	24.9528	0 .	1 x 39	12 p13	forkhead box M1
TC06001343.hg	144	TC06001343.hg	H2AC4	7.29911	0.768178	2.27314	-2.11163	0.715054	17.1464	0 .	1 x 39	6 p22	H2A clustered histone 4
TC07001240.hg	145	TC07001240.hg		5.66756	0.834819	2.27231	-2.31715	0.654942	14.5284	0 .	2 x 43	7 p14	novel transcript, antisense to CHN2
TC08000701.hg	146	TC08000701.hg	MTBP	5.2818	0.667332	2.27169	-1.37106	0.720783	17.4311	0 .	1 x 38	8 q24	MDM2 binding protein
TC01005864.hg	147	TC01005864.hg		6.50012	0.821228	2.26995	-2.17896	0.518761	10.1717	0 .	2 x 45	1 q23	novel transcript, antisense to BCAN
TC17001462.hg	148	TC17001462.hg	TOP2A	8.03761	1.11024	2.2685	-3.81031	0.89691	33.9994	0 .	1 x 40	17 q21	DNA topoisomerase II alpha
TC07002515.hg	149	TC07002515.hg		6.106	0.751866	2.25663	-1.53833	0.377363	6.83079	2.6117330520492e-11 .	2 x 45	7 q22	novel transcript
TC02004059.hg	150	TC02004059.hg		4.66795	0.813838	2.25323	-1.66197	0.656112	14.574	0 .	1 x 42
TC07002185.hg	151	TC07002185.hg	ITGB8	6.34402	1.03551	2.25308	-3.61693	0.426612	7.90695	3.03090885722668e-14 .	1 x 45	7 p21	integrin subunit beta 8
TC10000826.hg	152	TC10000826.hg	PLEKHS1	6.34127	1.06128	2.25285	-2.56354	0.632489	13.6882	0 .	1 x 45	10 q25	pleckstrin homology domain containing S1
TC13000644.hg	153	TC13000644.hg	RUBCNL	6.9821	1.02228	2.25212	-2.52736	0.388588	7.0695	6.16484641113857e-12 .	2 x 45	13 q14	rubicon like autophagy enhancer
TC13000111.hg	154	TC13000111.hg	BRCA2	6.03529	0.8095	2.25031	-1.96313	0.781671	21.0091	0 .	1 x 39	13 q13	BRCA2 DNA repair associated
TC16000258.hg	155	TC16000258.hg	DCTN5	8.02127	0.731171	2.24766	-2.055	0.840495	26.0036	0 .	1 x 40	16 p12	dynactin subunit 5
TC08000613.hg	156	TC08000613.hg	SPAG1	6.53978	0.850467	2.24649	-1.59627	0.602793	12.6641	0 .	1 x 40	8 q22	sperm associated antigen 1
TC13001534.hg	157	TC13001534.hg	DIAPH3	6.6155	0.9653	2.23605	-2.68757	0.853214	27.4224	0 .	1 x 40	13 q21	diaphanous related formin 3
TC07002818.hg	158	TC07002818.hg	MACC1	8.48747	1.07596	2.22896	-4.85196	0.749842	18.9984	0 .	1 x 44	7 p21	MET transcriptional regulator MACC1
TC01003192.hg	159	TC01003192.hg	H4C14	7.21265	0.693133	2.22484	-2.27754	0.531002	10.5045	0 .	3 x 39	1 q21	H4 clustered histone 14
TC07001506.hg	160	TC07001506.hg	CLDN3	9.72143	0.938762	2.22326	-3.23766	0.724575	17.6236	0 .	1 x 43	7 q11	claudin 3
TC06002142.hg	161	TC06002142.hg	MTFR2	5.01736	0.677851	2.22279	-1.52782	0.785441	21.2726	0 .	1 x 39	6 q23	mitochondrial fission regulator 2
TC01003085.hg	162	TC01003085.hg	FAM72C	6.22032	0.776855	2.21524	-2.56442	0.74658	18.8111	0 .	1 x 39	1 q21	family with sequence similarity 72 member C
TC07002494.hg	163	TC07002494.hg	MUC12	11.8404	1.90864	2.21397	-6.52487	0.579038	11.9054	0 .	1 x 44	7 q22	mucin 12, cell surface associated
TC02002656.hg	164	TC02002656.hg	SATB2	7.22021	1.02296	2.21232	-2.16182	0.583443	12.0424	0 .	1 x 44	2 q33	SATB homeobox 2
TC11000482.hg	165	TC11000482.hg	FAM111B	6.15482	0.901086	2.20677	-2.34273	0.823626	24.3443	0 .	1 x 39	11 q12	family with sequence similarity 111 member B
TC13000701.hg	166	TC13000701.hg	DIAPH3	6.15706	0.771592	2.20618	-1.87599	0.828965	24.8453	0 .	1 x 40	13 q21	diaphanous related formin 3
TC06003069.hg	167	TC06003069.hg	MYB	9.41084	1.29864	2.20254	-4.63946	0.902677	35.1637	0 .	1 x 43	6 q23	MYB proto-oncogene, transcription factor
TC10001756.hg	168	TC10001756.hg	MKI67	8.74499	1.08164	2.19711	-3.91439	0.893004	33.2618	0 .	1 x 40	10 q26	marker of proliferation Ki-67
TC17000691.hg	169	TC17000691.hg	TOM1L1	8.08107	0.719952	2.18819	-2.57893	0.688862	15.9299	0 .	2 x 42	17 q22	target of myb1 like 1 membrane trafficking protein
TC04000416.hg	170	TC04000416.hg	PARM1	9.10084	1.05069	2.18178	-3.29697	0.434492	8.08661	9.2148511043888e-15 .	1 x 45	4 q13	prostate androgen-regulated mucin-like protein 1
TC20001661.hg	171	TC20001661.hg	AURKA	7.6158	0.859693	2.17957	-2.69097	0.861714	28.4689	0 .	1 x 40	20 q13	aurora kinase A
TC15002807.hg	172	TC15002807.hg	PCLAF	6.01985	0.615892	2.17682	-1.48186	0.799613	22.3207	0 .	1 x 39	15 q22	PCNA clamp associated factor
TC17001647.hg	173	TC17001647.hg	HOXB9	8.52831	0.848767	2.16193	-2.4634	0.581445	11.98	0 .	1 x 43	17 q21	homeobox B9
TC06000265.hg	174	TC06000265.hg	H2BC14	6.32521	0.709918	2.16072	-1.65725	0.453189	8.52222	4.44089209850063e-16 .	1 x 38	6 p22	H2B clustered histone 14
TC06002842.hg	175	TC06002842.hg	FAM83B	6.6702	1.21335	2.16036	-3.88059	0.851925	27.2711	0 .	1 x 43	6 p12	novel transcript, overlapping to FAM83B
TC17001732.hg	176	TC17001732.hg	RNF43	9.14414	1.10928	2.16	-3.92569	0.768388	20.1263	0 .	1 x 45	17 q22	ring finger protein 43
TC06001091.hg	177	TC06001091.hg	PPP1R14C	5.42243	0.908712	2.15821	-2.1513	0.550115	11.0427	0 .	2 x 43	6 q25	protein phosphatase 1 regulatory inhibitor subunit 14C
TC05002418.hg	178	TC05002418.hg	CCNB1	7.53878	1.06777	2.15361	-3.61704	0.856745	27.8467	0 .	1 x 40	5 q13	cyclin B1
TC6_qbl_hap6000166.hg	179	TC6_qbl_hap6000166.hg	SLC44A4	9.33057	1.09088	2.15071	-3.38238	0.73836	18.3527	0 .	1 x 44	CHR_HSCHR6_MHC_DBB_CTG1 p21	solute carrier family 44 member 4
TC09000207.hg	180	TC09000207.hg	MELK	6.41421	0.956452	2.14959	-2.63203	0.871781	29.8302	0 .	1 x 40	9 p13	maternal embryonic leucine zipper kinase
TC6_dbb_hap3000165.hg	181	TC6_dbb_hap3000165.hg	SLC44A4	9.15929	1.06528	2.14767	-3.27311	0.736488	18.2508	0 .	1 x 44	CHR_HSCHR6_MHC_DBB_CTG1 p21	solute carrier family 44 member 4
TC01006091.hg	182	TC01006091.hg	NEK2	6.86605	1.11743	2.1468	-3.35971	0.884782	31.8272	0 .	1 x 40	1 q32	NIMA related kinase 2
TC06001549.hg	183	TC06001549.hg	SLC44A4	9.15977	1.0652	2.1463	-3.27058	0.73662	18.258	0 .	1 x 44	CHR_HSCHR6_MHC_DBB_CTG1 p21	solute carrier family 44 member 4
TC6_cox_hap2000176.hg	184	TC6_cox_hap2000176.hg	SLC44A4	9.15977	1.0652	2.1463	-3.27058	0.73662	18.258	0 .	1 x 44	CHR_HSCHR6_MHC_DBB_CTG1 p21	solute carrier family 44 member 4
TC07003020.hg	185	TC07003020.hg	CLDN3	10.4737	0.93219	2.14588	-2.90341	0.74718	18.8453	0 .	1 x 43	7 q11	claudin 3
TC02003219.hg	186	TC02003219.hg	MSH2	8.18985	0.598701	2.14428	-1.87987	0.74349	18.6366	0 .	1 x 38	2 p21	mutS homolog 2
TC06001387.hg	187	TC06001387.hg	H2BC12	9.52459	0.769484	2.13872	-1.87782	0.633208	13.7141	0 .	1 x 39	6 p22	H2B clustered histone 12
TC01003343.hg	188	TC01003343.hg	IQGAP3	7.11102	0.574185	2.13852	-1.58897	0.802309	22.5313	0 .	1 x 40	1 q22	IQ motif containing GTPase activating protein 3
TC01003477.hg	189	TC01003477.hg	GPA33	8.09694	0.999405	2.13799	-2.41887	0.7057	16.6965	0 .	1 x 43	1 q24	glycoprotein A33
TC04000155.hg	190	TC04000155.hg	NCAPG	6.18523	0.858719	2.1356	-2.21933	0.832977	25.2359	0 .	1 x 39	4 p15	non-SMC condensin I complex subunit G
TC11000229.hg	191	TC11000229.hg	NCR3LG1	7.80036	0.740105	2.13555	-2.17458	0.730412	17.9265	0 .	1 x 42	11 p15	natural killer cell cytotoxicity receptor 3 ligand 1
TC09001683.hg	192	TC09001683.hg	ABO	6.98876	0.779708	2.13546	-1.74063	0.513046	10.0193	0 .	2 x 43	9 q34	ABO, alpha 1-3-N-acetylgalactosaminyltransferase and alpha 1-3-galactosyltransferase
TC06000966.hg	193	TC06000966.hg	CENPW	6.38143	0.567725	2.13292	-1.33128	0.660929	14.7634	0 .	1 x 38	6 q22	centromere protein W
TC6_apd_hap1000090.hg	194	TC6_apd_hap1000090.hg	SLC44A4	9.17544	1.07553	2.13129	-3.38605	0.738721	18.3724	0 .	1 x 44	CHR_HSCHR6_MHC_DBB_CTG1 p21	solute carrier family 44 member 4
TC6_ssto_hap7000145.hg	195	TC6_ssto_hap7000145.hg	SLC44A4	9.17544	1.07553	2.13129	-3.38605	0.738721	18.3724	0 .	1 x 44	CHR_HSCHR6_MHC_DBB_CTG1 p21	solute carrier family 44 member 4
TC6_mcf_hap5000151.hg	196	TC6_mcf_hap5000151.hg	SLC44A4	9.17563	1.07546	2.13095	-3.38624	0.738544	18.3627	0 .	1 x 44	CHR_HSCHR6_MHC_DBB_CTG1 p21	solute carrier family 44 member 4
TC09002074.hg	197	TC09002074.hg	CKS2	8.01065	0.870873	2.12806	-2.61784	0.802411	22.5393	0 .	1 x 40	9 q22	CDC28 protein kinase regulatory subunit 2
TC19001085.hg	198	TC19001085.hg	FUT3	7.9008	0.89898	2.12518	-2.40928	0.599366	12.5516	0 .	1 x 44	19 p13	fucosyltransferase 3 (Lewis blood group)
TC01001585.hg	199	TC01001585.hg	LAMC2	8.66722	1.02317	2.1241	-3.07637	0.544664	10.8868	0 .	1 x 44	1 q25	laminin subunit gamma 2
TC13001100.hg	200	TC13001100.hg	CKAP2	7.8252	0.891384	2.12239	-2.96098	0.781894	21.0245	0 .	1 x 40	13 q14	cytoskeleton associated protein 2
TC16000425.hg	201	TC16000425.hg	ORC6	5.82876	0.481041	2.11856	-1.00027	0.752819	19.172	0 .	2 x 38	16 q11	origin recognition complex subunit 6
TC01002766.hg	202	TC01002766.hg	DEPDC1	5.44487	0.76014	2.11683	-1.6767	0.786014	21.3132	0 .	1 x 39	1 p31	DEP domain containing 1
TC03001591.hg	203	TC03001591.hg	STX19	5.27503	0.798461	2.11675	-1.8117	0.608529	12.8549	0 .	2 x 45	3 q11	syntaxin 19
TC21000049.hg	204	TC21000049.hg	CXADR	9.11933	0.91767	2.10687	-4.73134	0.716922	17.2384	0 .	1 x 43	21 q21	CXADR Ig-like cell adhesion molecule
TC01003174.hg	205	TC01003174.hg	FAM72C	5.4199	0.634653	2.10668	-1.5265	0.715919	17.1889	0 .	1 x 38	1 q21	family with sequence similarity 72 member C
TC09002617.hg	206	TC09002617.hg	RASEF	7.66038	1.22542	2.10354	-4.51846	0.795813	22.0302	0 .	1 x 44	9 q21	RAS and EF-hand domain containing
TC20000063.hg	207	TC20000063.hg	MCM8	7.13196	0.784709	2.10113	-1.97143	0.719783	17.3808	0 .	1 x 39	20 p12	novel protein
TC11001508.hg	208	TC11001508.hg	CCDC34	6.27319	0.590676	2.09953	-1.26272	0.785156	21.2525	0 .	1 x 39	11 p14	coiled-coil domain containing 34
TC12002256.hg	209	TC12002256.hg	GPRC5A	9.26667	1.32076	2.09951	-4.31082	0.52764	10.4122	0 .	1 x 44	12 p13	G protein-coupled receptor class C group 5 member A
TC08001431.hg	210	TC08001431.hg	CDH17	9.79225	1.53484	2.09704	-5.95215	0.862577	28.5801	0 .	1 x 44	8 q22	cadherin 17
TC16001225.hg	211	TC16001225.hg	NQO1	8.62398	1.05937	2.09262	-3.53347	0.669241	15.098	0 .	1 x 44	16 q22	NAD(P)H quinone dehydrogenase 1
TC21000594.hg	212	TC21000594.hg	CXADR	8.26439	1.00239	2.09151	-5.32061	0.712753	17.034	0 .	1 x 43	21 q21	CXADR Ig-like cell adhesion molecule
TC10001914.hg	213	TC10001914.hg	SUV39H2	6.06372	0.640053	2.09119	-1.35082	0.763777	19.8352	0 .	1 x 38	10 p13	suppressor of variegation 3-9 homolog 2
TC03003258.hg	214	TC03003258.hg		5.85955	0.944355	2.09062	-2.46945	0.576974	11.8417	0 .	1 x 45
TC13000726.hg	215	TC13000726.hg	MZT1	6.41354	0.513934	2.08258	-1.22702	0.682983	15.6741	0 .	3 x 39	13 q21	mitotic spindle organizing protein 1
TC15001248.hg	216	TC15001248.hg	OIP5	5.41936	0.731048	2.08065	-1.29112	0.758149	19.4898	0 .	1 x 39	15 q15	Opa interacting protein 5
TC17002490.hg	217	TC17002490.hg		6.57545	0.758481	2.08041	-1.96391	0.734873	18.1637	0 .	1 x 42	17 p12	novel transcript
TC15000290.hg	218	TC15000290.hg	KNL1	6.07833	0.78046	2.07319	-1.92745	0.824323	24.4086	0 .	1 x 39	15 q15	kinetochore scaffold 1
TC07002047.hg	219	TC07002047.hg	XRCC2	6.18154	0.770898	2.06724	-1.60747	0.797187	22.1344	0 .	1 x 39	7 q36	X-ray repair cross complementing 2
TC15000638.hg	220	TC15000638.hg	KIF23	6.90835	0.895797	2.06629	-2.49173	0.858003	28.0014	0 .	1 x 39	15 q23	kinesin family member 23
TC06000761.hg	221	TC06000761.hg	TTK	6.04082	0.852875	2.06247	-2.43582	0.879951	31.0499	0 .	1 x 40	6 q14	TTK protein kinase
TC15000850.hg	222	TC15000850.hg	TICRR	6.10806	0.767682	2.06112	-1.74282	0.82891	24.8401	0 .	1 x 39	15 q26	TOPBP1 interacting checkpoint and replication regulator
TC12002772.hg	223	TC12002772.hg	GUCY2C	7.75522	1.32388	2.05986	-4.00104	0.830301	24.974	0 .	1 x 44	12 p12	guanylate cyclase 2C
TC17000819.hg	224	TC17000819.hg	SOX9	9.43024	0.882865	2.05888	-3.06055	0.722169	17.501	0 .	1 x 45	17 q24	SRY-box transcription factor 9
TC11002578.hg	225	TC11002578.hg	NCR3LG1	7.30763	0.775051	2.05715	-1.98094	0.743353	18.6289	0 .	1 x 42	11 p15	natural killer cell cytotoxicity receptor 3 ligand 1
TC01002500.hg	226	TC01002500.hg	CLSPN	5.73014	0.623084	2.05536	-1.34363	0.739949	18.4398	0 .	1 x 38	1 p34	claspin
TC12001271.hg	227	TC12001271.hg	GUCY2C	7.67573	1.31503	2.05482	-3.92246	0.8305	24.9933	0 .	1 x 44	12 p12	guanylate cyclase 2C
TC01002598.hg	228	TC01002598.hg		8.06549	1.11584	2.05174	-3.66555	0.366236	6.59763	1.03555497510399e-10 .	1 x 39	1 p34	RNA, U5D small nuclear 1
TC04001436.hg	229	TC04001436.hg	CENPE	5.874	0.827484	2.05117	-2.31733	0.785502	21.2769	0 .	1 x 39	4 q24	centromere protein E
TC06001348.hg	230	TC06001348.hg	H4C4	7.88118	0.729992	2.03782	-2.06586	0.742748	18.5951	0 .	1 x 39	6 p22	H4 clustered histone 4
TC03001007.hg	231	TC03001007.hg	EPHB3	7.39926	0.661041	2.03739	-1.26715	0.549628	11.0287	0 .	3 x 41	3 q27	EPH receptor B3
TC16000657.hg	232	TC16000657.hg	ATP2C2	7.49172	0.761259	2.03698	-1.83098	0.768603	20.1401	0 .	2 x 45	16 q24	ATPase secretory pathway Ca2+ transporting 2
TC10001754.hg	233	TC10001754.hg	CLRN3	7.78665	1.00536	2.02791	-3.49711	0.668141	15.0532	0 .	1 x 45	10 q26	clarin 3
TC04000544.hg	234	TC04000544.hg	ARHGEF38	5.93178	0.771715	2.02725	-1.95826	0.65682	14.6016	0 .	2 x 45	4 q24	Rho guanine nucleotide exchange factor 38
TC02002492.hg	235	TC02002492.hg	GALNT3	7.1022	0.891176	2.0245	-2.67566	0.901405	34.8987	0 .	1 x 43	2 q24	polypeptide N-acetylgalactosaminyltransferase 3
TC15000283.hg	236	TC15000283.hg	KNSTRN	6.72587	0.592154	2.02426	-1.31594	0.757069	19.4246	0 .	1 x 38	15 q15	kinetochore localized astrin (SPAG5) binding protein
TC01003771.hg	237	TC01003771.hg	C1orf116	7.37409	0.759563	2.02032	-2.03116	0.570542	11.6454	0 .	1 x 45	1 q32	chromosome 1 open reading frame 116
TC17000627.hg	238	TC17000627.hg		7.83378	1.12844	2.01667	-2.74049	0.406019	7.44762	5.86197757002083e-13 .	1 x 45	17 q21	long intergenic non-protein coding RNA 2086
TC06002157.hg	239	TC06002157.hg	PERP	8.93277	0.766549	2.0153	-3.06123	0.675471	15.3555	0 .	1 x 45	6 q23	p53 apoptosis effector related to PMP22
TC06001386.hg	240	TC06001386.hg	H2BC11	7.61217	0.717143	2.01406	-1.99458	0.736777	18.2665	0 .	1 x 39	6 p22	H2B clustered histone 11
TC06000162.hg	241	TC06000162.hg	H3C1	6.04238	0.590204	2.01054	-1.6481	0.588439	12.1998	0 .	1 x 38	6 p22	H3 clustered histone 1
TC08000729.hg	242	TC08000729.hg	SQLE	8.43257	0.869935	2.00946	-2.20434	0.756271	19.3768	0 .	1 x 40	8 q24	squalene epoxidase
TC09000415.hg	243	TC09000415.hg	CKS2	7.75268	0.715066	2.00401	-2.0405	0.800135	22.3612	0 .	1 x 40	9 q22	CDC28 protein kinase regulatory subunit 2
TC16001083.hg	244	TC16001083.hg	SHCBP1	5.79319	0.565839	2.00386	-1.46301	0.711559	16.9762	0 .	1 x 38	16 q11	SHC binding and spindle associated 1
TC06000758.hg	245	TC06000758.hg	SH3BGRL2	8.55122	0.791047	2.00325	-3.42664	0.790719	21.6519	0 .	1 x 44	6 q14	SH3 domain binding glutamate rich protein like 2
TC05000697.hg	246	TC05000697.hg	KIF20A	6.40678	0.617812	2.00237	-1.49118	0.773051	20.4285	0 .	1 x 39	5 q31	kinesin family member 20A
TC05000298.hg	247	TC05000298.hg	CCNB1	7.22196	0.744008	2.00005	-2.16309	0.838874	25.834	0 .	1 x 39	5 q13	cyclin B1
TC21000154.hg	248	TC21000154.hg	CHAF1B	6.47093	0.552191	1.99217	-1.17516	0.772177	20.3713	0 .	1 x 38	21 q22	chromatin assembly factor 1 subunit B
TC06000268.hg	249	TC06000268.hg	H2BC15	4.44997	0.554282	1.98799	-1.32711	0.714661	17.1271	0 .	1 x 38	6 p22	H2B clustered histone 15
TC20000822.hg	250	TC20000822.hg	RBL1	6.89649	0.637656	1.98797	-1.89486	0.667094	15.0106	0 .	1 x 38	20 q11	RB transcriptional corepressor like 1
TC08000346.hg	251	TC08000346.hg	MCM4	7.46741	0.651969	1.98679	-1.42925	0.763185	19.7984	0 .	1 x 39	8 q11	minichromosome maintenance complex component 4
TC13000223.hg	252	TC13000223.hg	CKAP2	7.02336	0.740025	1.9832	-2.39094	0.786109	21.3199	0 .	1 x 40	13 q14	cytoskeleton associated protein 2
TC03003201.hg	253	TC03003201.hg	MECOM	5.25272	0.743308	1.98233	-2.33883	0.757501	19.4506	0 .	1 x 43	3 q26	MDS1 and EVI1 complex locus
TC06001349.hg	254	TC06001349.hg	H2AC7	4.20379	0.604563	1.9768	-1.4469	0.700164	16.4386	0 .	1 x 39	6 p22	H2A clustered histone 7
TC18000436.hg	255	TC18000436.hg	DSC2	8.5338	0.693345	1.97629	-2.27933	0.676677	15.4061	0 .	2 x 42	18 q12	desmocollin 2
TC06003070.hg	256	TC06003070.hg	MYB	7.74532	1.14629	1.97362	-4.06092	0.88323	31.5726	0 .	1 x 43	6 q23	MYB proto-oncogene, transcription factor
TC02001035.hg	257	TC02001035.hg	CDCA7	7.41062	1.11715	1.97264	-3.49301	0.865867	29.0132	0 .	1 x 43	2 q31	cell division cycle associated 7
TC09000395.hg	258	TC09000395.hg		6.44292	0.601009	1.972	-1.21741	0.724422	17.6157	0 .	1 x 38	9 q21	cell division cycle 20 pseudogene 1
TC19000575.hg	259	TC19000575.hg	CYP2S1	9.4495	0.946187	1.97166	-2.98879	0.596659	12.4634	0 .	1 x 43	19 q13	cytochrome P450 family 2 subfamily S member 1
TC10000659.hg	260	TC10000659.hg	KIF11	6.69495	0.993441	1.97068	-2.76718	0.868135	29.3206	0 .	1 x 40	10 q23	kinesin family member 11
TC06000725.hg	261	TC06000725.hg		8.15211	0.897885	1.96865	-3.10231	0.683098	15.679	0 .	1 x 43	6 q13	keratin 19 pseudogene 1
TC06001353.hg	262	TC06001353.hg	H3C7	7.51396	0.805403	1.96757	-2.04242	0.649247	14.3094	0 .	1 x 39	6 p22	H3 clustered histone 7
TC10000098.hg	263	TC10000098.hg	MCM10	6.21876	0.646002	1.96633	-1.44347	0.802739	22.5653	0 .	1 x 39	10 p13	minichromosome maintenance 10 replication initiation factor
TC03000910.hg	264	TC03000910.hg	GPR160	6.95929	0.722929	1.96477	-1.98401	0.71259	17.0261	0 .	2 x 43	3 q26	G protein-coupled receptor 160
TC16000634.hg	265	TC16000634.hg	CENPN	6.83543	0.647934	1.96458	-1.37922	0.722616	17.5237	0 .	1 x 38	16 q23	centromere protein N
TC04002654.hg	266	TC04002654.hg	CENPE	6.46959	0.844775	1.96367	-2.2078	0.752701	19.1651	0 .	1 x 39	4 q24	centromere protein E
TC0X000519.hg	267	TC0X000519.hg	RNF128	7.71293	0.721027	1.96297	-2.9111	0.601388	12.6178	0 .	2 x 45	X q22	ring finger protein 128
TC08000213.hg	268	TC08000213.hg	ESCO2	6.26414	0.732062	1.9621	-1.57554	0.686584	15.83	0 .	1 x 39	8 p21	establishment of sister chromatid cohesion N-acetyltransferase 2
TC05002011.hg	269	TC05002011.hg	ATP10B	7.69228	0.941749	1.96206	-2.7961	0.760345	19.6233	0 .	1 x 44	5 q34	ATPase phospholipid transporting 10B (putative)
TC01001976.hg	270	TC01001976.hg	EXO1	5.62205	0.66594	1.96009	-1.48137	0.8237	24.3511	0 .	1 x 39	1 q43	exonuclease 1
TC01000849.hg	271	TC01000849.hg	EPHX4	5.67828	0.874187	1.96	-1.88468	0.489818	9.41801	0 .	1 x 45	1 p22	epoxide hydrolase 4
TC08001551.hg	272	TC08001551.hg	SAMD12	6.55066	0.778709	1.95972	-2.41174	0.774534	20.5263	0 .	1 x 43	8 q24	sterile alpha motif domain containing 12
TC17002256.hg	273	TC17002256.hg		7.96816	1.10004	1.95935	-2.58209	0.39059	7.11246	4.73776573528539e-12 .	1 x 45	17 q21	long intergenic non-protein coding RNA 2086
TC21000484.hg	274	TC21000484.hg	TFF3	7.51085	0.7845	1.95881	-1.47636	0.427883	7.93577	2.50910403565285e-14 .	1 x 45	21 q22	trefoil factor 3
TC04001516.hg	275	TC04001516.hg	CCNA2	7.64995	0.923492	1.9574	-2.75808	0.865079	28.9082	0 .	1 x 40	4 q27	cyclin A2
TC02003679.hg	276	TC02003679.hg	KLHL23	7.1522	0.939477	1.95622	-3.30218	0.805488	22.7846	0 .	1 x 44	2 q31	kelch like family member 23
TC15000449.hg	277	TC15000449.hg	CCNB2	6.40304	0.896421	1.95132	-2.59769	0.870597	29.6625	0 .	1 x 40	15 q22	cyclin B2
TC11001478.hg	278	TC11001478.hg	E2F8	6.76519	0.699675	1.9481	-1.41821	0.802434	22.5412	0 .	1 x 39	11 p15	E2F transcription factor 8
TC02001030.hg	279	TC02001030.hg	ITGA6	9.21869	0.736745	1.94677	-3.0802	0.763857	19.8402	0 .	1 x 43	2 q31	integrin subunit alpha 6
TC06000178.hg	280	TC06000178.hg	H2BC10	6.2996	0.697733	1.94538	-2.23134	0.603026	12.6718	0 .	1 x 39	6 p22	H2B clustered histone 10
TC13001318.hg	281	TC13001318.hg	TFDP1	8.63357	0.575191	1.94425	-1.45622	0.696567	16.2742	0 .	3 x 40	13 q34	transcription factor Dp-1
TC16000214.hg	282	TC16000214.hg	TMC5	7.96557	1.01767	1.94407	-3.30882	0.729079	17.8566	0 .	1 x 44	16 p12	transmembrane channel like 5
TC05000161.hg	283	TC05000161.hg	SKP2	7.50268	0.613061	1.94284	-1.41881	0.742614	18.5876	0 .	1 x 38	5 p13	S-phase kinase associated protein 2
TC06000796.hg	284	TC06000796.hg	PM20D2	7.63435	0.778858	1.94242	-2.35797	0.707286	16.7715	0 .	2 x 42	6 q15	peptidase M20 domain containing 2
TC06003619.hg	285	TC06003619.hg	SRPK1	9.36231	0.849213	1.94229	-2.44655	0.893506	33.3546	0 .	1 x 41	6 p21	SRSF protein kinase 1
TC10000373.hg	286	TC10000373.hg	CDK1	5.93134	0.821454	1.93883	-2.1184	0.868575	29.3809	0 .	1 x 39	10 q21	cyclin dependent kinase 1
TC07000235.hg	287	TC07000235.hg	ANLN	7.74614	1.0813	1.93882	-3.52614	0.883205	31.5684	0 .	1 x 40	7 p14	anillin actin binding protein
TC17001895.hg	288	TC17001895.hg	RNF157	6.34423	0.750828	1.93563	-1.25977	0.527867	10.4184	0 .	1 x 38	17 q25	ring finger protein 157
TC20000944.hg	289	TC20000944.hg	ATP9A	8.74679	0.822779	1.935	-3.04841	0.555931	11.2112	0 .	1 x 45	20 q13	ATPase phospholipid transporting 9A (putative)
TC16001318.hg	290	TC16001318.hg	GINS2	6.4253	0.616842	1.93474	-1.61656	0.721792	17.482	0 .	1 x 39	16 q24	GINS complex subunit 2
TC08000499.hg	291	TC08000499.hg	HNF4G	7.15212	0.893401	1.93128	-2.74594	0.797724	22.1754	0 .	1 x 42	8 q21	hepatocyte nuclear factor 4 gamma
TC16000207.hg	292	TC16000207.hg	TMC7	7.17029	0.955056	1.93096	-2.61836	0.524006	10.3132	0 .	1 x 45	16 p12	transmembrane channel like 7
TC08001584.hg	293	TC08001584.hg	ATAD2	7.11106	0.770406	1.93065	-1.85129	0.716443	17.2147	0 .	1 x 39	8 q24	ATPase family AAA domain containing 2
TC20000968.hg	294	TC20000968.hg	AURKA	7.07904	0.609574	1.92879	-1.47996	0.820554	24.0653	0 .	1 x 39	20 q13	aurora kinase A
TC10002200.hg	295	TC10002200.hg	KIF20B	6.10049	0.876777	1.92339	-2.29742	0.780088	20.9003	0 .	1 x 39	10 q23	kinesin family member 20B
TC12002850.hg	296	TC12002850.hg	SLC38A1	7.43201	0.932307	1.92223	-4.15777	0.829488	24.8955	0 .	1 x 44	12 q13	solute carrier family 38 member 1
TC05000907.hg	297	TC05000907.hg	HMMR	5.9764	0.694914	1.91844	-1.67627	0.849852	27.0314	0 .	1 x 39	5 q34	hyaluronan mediated motility receptor
TC11001509.hg	298	TC11001509.hg	LGR4	7.1131	0.743179	1.91778	-2.06497	0.633734	13.7332	0 .	1 x 40	11 p14	leucine rich repeat containing G protein-coupled receptor 4
TC06000174.hg	299	TC06000174.hg	H3C6	5.5254	0.521325	1.9172	-1.48843	0.653211	14.4614	0 .	3 x 39	6 p22	H3 clustered histone 6
TC16001050.hg	300	TC16001050.hg	PRSS8	9.26353	0.863721	1.91521	-2.72342	0.742861	18.6014	0 .	1 x 44	16 p11	serine protease 8
TC14001154.hg	301	TC14001154.hg	WDHD1	5.8984	0.66564	1.91499	-1.50216	0.763167	19.7972	0 .	1 x 38	14 q22	WD repeat and HMG-box DNA binding protein 1
TC13000119.hg	302	TC13000119.hg	RFC3	7.02838	0.699811	1.91349	-1.6802	0.806252	22.8463	0 .	1 x 40	13 q13	replication factor C subunit 3
TC15002759.hg	303	TC15002759.hg	CKMT1B	7.96623	0.946759	1.91047	-2.5182	0.763366	19.8096	0 .	1 x 42	15 q15	creatine kinase, mitochondrial 1B
TC15000306.hg	304	TC15000306.hg	NUSAP1	7.48299	0.854356	1.9088	-1.99204	0.845824	26.5785	0 .	1 x 39	15 q15	novel protein
TC07002868.hg	305	TC07002868.hg	GGCT	7.80282	0.694703	1.90837	-1.90328	0.787536	21.4217	0 .	1 x 39	7 p14	gamma-glutamylcyclotransferase
TC13000286.hg	306	TC13000286.hg	LMO7	8.02587	0.757831	1.90769	-2.7485	0.607744	12.8286	0 .	2 x 45	13 q22	LIM domain 7
TC17002618.hg	307	TC17002618.hg	TOP2A	7.2797	1.03945	1.90654	-3.60027	0.855789	27.7305	0 .	1 x 40	17 q21	DNA topoisomerase II alpha
TC10000664.hg	308	TC10000664.hg	CEP55	6.18104	0.795297	1.9017	-2.12318	0.822895	24.2774	0 .	1 x 39	10 q23	centrosomal protein 55
TC20000603.hg	309	TC20000603.hg	FERMT1	8.77655	1.22206	1.90168	-4.35974	0.783007	21.1018	0 .	1 x 44	20 p12	fermitin family member 1
TC19000584.hg	310	TC19000584.hg	CEACAM6	10.4118	1.40795	1.9015	-5.41268	0.67545	15.3546	0 .	1 x 44	19 q13	CEA cell adhesion molecule 6
TC12000237.hg	311	TC12000237.hg	CMAS	8.18937	0.615598	1.90022	-1.99081	0.740819	18.4879	0 .	1 x 39	12 p12	cytidine monophosphate N-acetylneuraminic acid synthetase
TC08001736.hg	312	TC08001736.hg	EPPK1	7.80958	0.733228	1.89939	-2.4349	0.693447	16.1335	0 .	1 x 45	8 q24	epiplakin 1
TC01001767.hg	313	TC01001767.hg	DTL	6.50198	0.819497	1.8989	-2.11573	0.854292	27.5505	0 .	1 x 40	1 q32	denticleless E3 ubiquitin protein ligase homolog
TC10002686.hg	314	TC10002686.hg	DNA2	5.73012	0.619513	1.89786	-1.35285	0.757353	19.4417	0 .	1 x 39	10 q21	DNA replication helicase/nuclease 2
TC03002676.hg	315	TC03002676.hg	ACTL6A	4.80074	0.7569	1.89424	-1.97758	0.627662	13.5154	0 .	1 x 39	3 q26	actin like 6A
TC10000047.hg	316	TC10000047.hg	NET1	9.22189	0.666794	1.89394	-2.66454	0.768661	20.1438	0 .	2 x 42	10 p15	neuroepithelial cell transforming 1
TC15000223.hg	317	TC15000223.hg	ARHGAP11A	7.21664	0.770065	1.89231	-2.1927	0.829215	24.8693	0 .	1 x 39	15 q13	Rho GTPase activating protein 11A
TC16001357.hg	318	TC16001357.hg	FANCA	6.68064	0.513326	1.89196	-0.96586	0.67796	15.4601	0 .	1 x 38	16 q24	FA complementation group A
TC15001454.hg	319	TC15001454.hg	MYO5C	7.53939	0.861212	1.88629	-2.99207	0.85949	28.1866	0 .	1 x 42	15 q21	myosin VC
TC03001227.hg	320	TC03001227.hg	SGO1	6.21659	0.790728	1.88612	-1.82065	0.870814	29.6931	0 .	1 x 39	3 p24	shugoshin 1
TC10000673.hg	321	TC10000673.hg	HELLS	5.85832	0.751737	1.88443	-1.58158	0.800896	22.4205	0 .	1 x 39	10 q23	helicase, lymphoid specific
TC07000722.hg	322	TC07000722.hg	MET	8.35035	0.887866	1.88272	-3.38129	0.750002	19.0076	0 .	1 x 44	7 q31	MET proto-oncogene, receptor tyrosine kinase
TC03001695.hg	323	TC03001695.hg	POLQ	5.52103	0.70049	1.88252	-1.51498	0.797187	22.1344	0 .	1 x 39	3 q13	DNA polymerase theta
TC05000795.hg	324	TC05000795.hg	SH3RF2	6.90207	0.519631	1.88177	-1.4543	0.71475	17.1314	0 .	3 x 41	5 q32	SH3 domain containing ring finger 2
TC09001769.hg	325	TC09001769.hg	NRARP	7.00013	0.753345	1.87999	-2.29318	0.66119	14.7738	0 .	1 x 41	9 q34	NOTCH regulated ankyrin repeat protein
TC06001010.hg	326	TC06001010.hg	MYB	7.39247	0.887233	1.87983	-2.6532	0.872298	29.9042	0 .	1 x 42	6 q23	MYB proto-oncogene, transcription factor
TC08001191.hg	327	TC08001191.hg	PRKDC	8.9635	0.688081	1.87851	-1.68677	0.670867	15.1647	0 .	1 x 38	8 q11	protein kinase, DNA-activated, catalytic subunit
TC05002612.hg	328	TC05002612.hg	SLC12A2	9.43277	1.19377	1.87561	-5.17956	0.791884	21.7374	0 .	1 x 44	5 q23	solute carrier family 12 member 2
TC17002255.hg	329	TC17002255.hg		6.43014	1.03998	1.87488	-2.77027	0.431916	8.02763	1.36557432028894e-14 .	1 x 45	17 q21	long intergenic non-protein coding RNA 2086
TC13000523.hg	330	TC13000523.hg	SLC7A1	8.15111	0.77686	1.87245	-2.32758	0.777806	20.7452	0 .	1 x 41	13 q12	solute carrier family 7 member 1
TC09002021.hg	331	TC09002021.hg	GCNT1	7.02654	0.691277	1.87228	-1.99917	0.604905	12.734	0 .	3 x 41	9 q21	glucosaminyl (N-acetyl) transferase 1
TC07001182.hg	332	TC07001182.hg	MACC1	7.75777	0.962462	1.87037	-4.07781	0.755706	19.343	0 .	1 x 44	7 p21	MET transcriptional regulator MACC1
TC06000168.hg	333	TC06000168.hg	H1-4	10.2341	0.6527	1.86999	-2.1636	0.653345	14.4666	0 .	1 x 39	6 p22	H1.4 linker histone, cluster member
TC06000171.hg	334	TC06000171.hg	H2BC7	7.51563	0.767092	1.86888	-2.38743	0.746287	18.7945	0 .	1 x 39	6 p22	H2B clustered histone 7
TC10001347.hg	335	TC10001347.hg	DNA2	5.33001	0.595334	1.8651	-1.16287	0.758292	19.4984	0 .	1 x 38	10 q21	DNA replication helicase/nuclease 2
TC0X000872.hg	336	TC0X000872.hg	FANCB	4.59322	0.563283	1.86251	-1.31712	0.700876	16.4715	0 .	1 x 38	X p22	FA complementation group B
TC01000873.hg	337	TC01000873.hg	SLC44A3	7.14793	0.696172	1.86077	-2.28861	0.783687	21.1492	0 .	2 x 45	1 p21	solute carrier family 44 member 3
TC01003662.hg	338	TC01003662.hg	ASPM	6.34192	0.978679	1.85842	-2.712	0.863274	28.6706	0 .	1 x 40	1 q31	abnormal spindle microtubule assembly
TC03000930.hg	339	TC03000930.hg	ECT2	7.33689	0.914166	1.85693	-3.05354	0.89904	34.4185	0 .	1 x 41	3 q26	epithelial cell transforming 2
TC0X001747.hg	340	TC0X001747.hg	HEPH	8.3448	0.871024	1.85658	-3.13961	0.640807	13.9923	0 .	1 x 44	X q12	hephaestin
TC08000529.hg	341	TC08000529.hg	E2F5	5.78099	0.614392	1.85647	-1.41675	0.699635	16.4143	0 .	3 x 39	8 q21	E2F transcription factor 5
TC06000173.hg	342	TC06000173.hg	H2AC8	9.04774	0.806416	1.85565	-3.04516	0.802023	22.5088	0 .	1 x 40	6 p22	H2A clustered histone 8
TC06001029.hg	343	TC06001029.hg	ARFGEF3	7.14165	0.716243	1.8536	-2.1654	0.763326	19.8071	0 .	1 x 45	6 q23	ARFGEF family member 3
TC13000513.hg	344	TC13000513.hg	CDX2	6.48273	0.74839	1.8512	-1.9022	0.73685	18.2704	0 .	2 x 45	13 q12	caudal type homeobox 2
TC06001668.hg	345	TC06001668.hg	SRPK1	8.17949	0.75412	1.85075	-2.19282	0.881484	31.2917	0 .	1 x 40	6 p21	SRSF protein kinase 1
TC08001560.hg	346	TC08001560.hg	DSCC1	5.08066	0.564163	1.85028	-0.971794	0.713134	17.0525	0 .	1 x 38	8 q24	DNA replication and sister chromatid cohesion 1
TC01006272.hg	347	TC01006272.hg	GIPC2	7.19968	0.900286	1.84657	-2.92101	0.752338	19.1438	0 .	1 x 42	1 p31	GIPC PDZ domain containing family member 2
TC21000211.hg	348	TC21000211.hg	H2BS1	10.1015	0.690541	1.84075	-1.9158	0.657378	14.6235	0 .	1 x 39	21 q22	H2B.S histone 1
TC10000644.hg	349	TC10000644.hg	KIF20B	6.27434	0.750285	1.83931	-1.93017	0.784918	21.2357	0 .	1 x 39	10 q23	kinesin family member 20B
TC09000526.hg	350	TC09000526.hg	SMC2	6.93334	0.69362	1.83897	-1.70578	0.79485	21.9578	0 .	1 x 39	9 q31	structural maintenance of chromosomes 2
TC04000874.hg	351	TC04000874.hg	NEIL3	5.54579	0.504993	1.83896	-1.10179	0.6804	15.5635	0 .	1 x 38	4 q34	nei like DNA glycosylase 3
TC01000563.hg	352	TC01000563.hg	KIF2C	6.68152	0.696288	1.83562	-1.65711	0.836085	25.5475	0 .	1 x 39	1 p34	kinesin family member 2C
TC15002160.hg	353	TC15002160.hg	RAD51	5.67757	0.452344	1.83549	-1.0023	0.711909	16.9931	0 .	2 x 38	15 q15	RAD51 recombinase
TC03000873.hg	354	TC03000873.hg	SMC4	7.18621	0.570246	1.83452	-1.75918	0.722208	17.503	0 .	1 x 38	3 q25	structural maintenance of chromosomes 4
TC02000582.hg	355	TC02000582.hg	NCAPH	6.48023	0.664196	1.83288	-1.58376	0.82026	24.039	0 .	1 x 39	2 q11	non-SMC condensin I complex subunit H
TC06000169.hg	356	TC06000169.hg	H2BC5	6.44482	0.573832	1.83025	-1.72501	0.701762	16.5125	0 .	1 x 39	6 p22	H2B clustered histone 5
TC02000104.hg	357	TC02000104.hg	VSNL1	7.32211	0.798858	1.82847	-1.64138	0.498549	9.64075	0 .	3 x 39	2 p24	visinin like 1
TC17000355.hg	358	TC17000355.hg	ATAD5	5.83905	0.659623	1.82543	-1.50304	0.784256	21.1891	0 .	1 x 39	17 q11	ATPase family AAA domain containing 5
TC06001751.hg	359	TC06001751.hg	XPO5	7.67033	0.566448	1.82491	-1.35202	0.663017	14.8466	0 .	3 x 40	6 p21	exportin 5
TC12001136.hg	360	TC12001136.hg	SCNN1A	8.05568	0.772245	1.82335	-2.14718	0.572191	11.6954	0 .	1 x 45	12 p13	sodium channel epithelial 1 alpha subunit
TC15002758.hg	361	TC15002758.hg	CKMT1B	8.14671	0.822117	1.82328	-2.07692	0.726917	17.7441	0 .	1 x 42	15 q15	creatine kinase, mitochondrial 1B
TC06003479.hg	362	TC06003479.hg	MCUR1	6.87919	0.716373	1.81992	-1.9671	0.667233	15.0163	0 .	1 x 40	6 p23	mitochondrial calcium uniporter regulator 1
TC07000159.hg	363	TC07000159.hg	NFE2L3	8.05261	0.81771	1.81714	-3.22714	0.694336	16.1734	0 .	1 x 43	7 p15	nuclear factor, erythroid 2 like 3
TC02000087.hg	364	TC02000087.hg	LRATD1	7.79202	0.58339	1.813	-1.72286	0.72394	17.5911	0 .	2 x 43	2 p24	LRAT domain containing 1
TC06002880.hg	365	TC06002880.hg	MYO6	8.30334	0.68703	1.81276	-2.67272	0.689213	15.9453	0 .	2 x 43	6 q14	myosin VI
TC03003170.hg	366	TC03003170.hg	PLCH1	5.9099	0.736536	1.80998	-1.94637	0.818344	23.8686	0 .	1 x 42	3 q25	phospholipase C eta 1
TC07002879.hg	367	TC07002879.hg	NT5C3A	7.38717	0.660029	1.80951	-1.94114	0.784335	21.1947	0 .	1 x 41	7 p14	5'-nucleotidase, cytosolic IIIA
TC01001430.hg	368	TC01001430.hg	NUF2	5.97348	0.808822	1.80704	-1.97752	0.862367	28.553	0 .	1 x 40	1 q23	NUF2 component of NDC80 kinetochore complex
TC09001276.hg	369	TC09001276.hg	RASEF	7.26403	0.987512	1.80383	-3.45427	0.794898	21.9614	0 .	1 x 44	9 q21	RAS and EF-hand domain containing
TC0X001208.hg	370	TC0X001208.hg	TSPAN6	8.60704	0.831315	1.80354	-3.3835	0.715612	17.1738	0 .	1 x 45	X q22	tetraspanin 6
TC12001377.hg	371	TC12001377.hg	PKP2	8.80217	0.822927	1.8018	-3.6151	0.813764	23.4708	0 .	1 x 43	12 p11	plakophilin 2
TC01000545.hg	372	TC01000545.hg	CDC20	7.24978	0.559604	1.80003	-1.21553	0.740086	18.4474	0 .	1 x 39	1 p34	cell division cycle 20
TC12003220.hg	373	TC12003220.hg	MYO1A	6.77838	0.772599	1.79811	-1.63387	0.578644	11.8932	0 .	2 x 42	12 q13	myosin IA
TC10002678.hg	374	TC10002678.hg	DBF4	6.72956	0.745632	1.79525	-2.0279	0.771441	20.3233	0 .	1 x 39	7 q21	DBF4 zinc finger
TC15002245.hg	375	TC15002245.hg	ZWILCH	6.72483	0.685994	1.79165	-1.81052	0.749799	18.9959	0 .	1 x 38	15 q22	zwilch kinetochore protein
TC17002855.hg	376	TC17002855.hg	AXIN2	8.3132	0.866945	1.79118	-2.49912	0.570711	11.6505	0 .	2 x 45	17 q24	axin 2
TC19002491.hg	377	TC19002491.hg	CEACAM1	9.76875	1.08355	1.78759	-3.91661	0.715421	17.1644	0 .	1 x 44	19 q13	CEA cell adhesion molecule 1
TC02002469.hg	378	TC02002469.hg	ITGB6	5.86904	0.676173	1.78457	-1.80434	0.636577	13.8366	0 .	1 x 45	2 q24	integrin subunit beta 6
TC06000223.hg	379	TC06000223.hg	H2AC11	7.39232	0.64146	1.78435	-1.52167	0.743244	18.6228	0 .	1 x 39	6 p22	H2A clustered histone 11
TC16000569.hg	380	TC16000569.hg	CYB5B	8.14038	0.737651	1.78421	-2.0391	0.665956	14.9646	0 .	1 x 45	16 q22	cytochrome b5 type B
TC17002651.hg	381	TC17002651.hg	ETV4	7.37786	0.685911	1.78212	-2.05096	0.623003	13.351	0 .	2 x 44	17 q21	ETS variant transcription factor 4
TC03000242.hg	382	TC03000242.hg	KIF15	5.66339	0.759318	1.78208	-1.81411	0.845823	26.5783	0 .	1 x 39	3 p21	kinesin family member 15
TC08000196.hg	383	TC08000196.hg	CDCA2	5.24747	0.560195	1.77789	-1.31894	0.678975	15.503	0 .	1 x 38	8 p21	cell division cycle associated 2
TC07001184.hg	384	TC07001184.hg	CDCA7L	7.08299	0.76938	1.77762	-1.94318	0.549115	11.0139	0 .	1 x 38	7 p15	cell division cycle associated 7 like
TC03001979.hg	385	TC03001979.hg		6.69007	0.601475	1.77632	-1.75758	0.767846	20.0917	0 .	2 x 42
TC05003257.hg	386	TC05003257.hg	CDC25C	5.95666	0.830167	1.77043	-2.305	0.862592	28.582	0 .	1 x 40	5 q31	cell division cycle 25C
TC04000437.hg	387	TC04000437.hg	ANXA3	7.80986	0.866937	1.76589	-2.99882	0.724009	17.5946	0 .	1 x 44	4 q21	annexin A3
TC19001505.hg	388	TC19001505.hg	LGALS4	8.78769	0.83654	1.76515	-2.83959	0.75545	19.3277	0 .	1 x 43	19 q13	galectin 4
TC03000768.hg	389	TC03000768.hg	PLS1	8.27942	0.978848	1.76476	-3.73856	0.861802	28.4802	0 .	1 x 43	3 q23	plastin 1
TC15000614.hg	390	TC15000614.hg	ZWILCH	6.604	0.658947	1.76318	-1.6389	0.751346	19.0857	0 .	1 x 38	15 q22	zwilch kinetochore protein
TC19000229.hg	391	TC19000229.hg	RNASEH2A	7.26157	0.430205	1.76217	-1.23005	0.755204	19.3131	0 .	2 x 38	19 p13	ribonuclease H2 subunit A
TC06000153.hg	392	TC06000153.hg	CARMIL1	7.73585	0.594798	1.75725	-1.87878	0.720608	17.4223	0 .	3 x 41	6 p22	capping protein regulator and myosin 1 linker 1
TC11001458.hg	393	TC11001458.hg	USH1C	7.62085	0.775224	1.75336	-2.52069	0.794066	21.8991	0 .	1 x 45	11 p15	USH1 protein network component harmonin
TC20000293.hg	394	TC20000293.hg	FAM83D	6.6921	0.481868	1.75328	-1.35147	0.695148	16.21	0 .	2 x 38	20 q11	family with sequence similarity 83 member D
TC12000795.hg	395	TC12000795.hg	PARPBP	5.43056	0.583255	1.75118	-1.46177	0.788838	21.5153	0 .	1 x 39	12 q23	PARP1 binding protein
TC10000185.hg	396	TC10000185.hg	PDSS1	7.03183	0.548459	1.74856	-1.37439	0.723623	17.5749	0 .	3 x 40	10 p12	decaprenyl diphosphate synthase subunit 1
TC07002854.hg	397	TC07002854.hg	HOXA10	7.46762	1.0073	1.74627	-2.59309	0.552701	11.1173	0 .	1 x 45	7 p15	homeobox A10
TC17001138.hg	398	TC17001138.hg		6.22576	0.544486	1.7423	-1.58025	0.667271	15.0178	0 .	3 x 41	17 p12	novel transcript
TC02002886.hg	399	TC02002886.hg	HJURP	6.75619	0.555412	1.73938	-1.2804	0.782944	21.0974	0 .	1 x 39	2 q37	Holliday junction recognition protein
TC12001723.hg	400	TC12001723.hg	TSPAN8	6.67568	0.989591	1.73888	-3.23027	0.704026	16.6179	0 .	1 x 44	12 q21	tetraspanin 8
TC09000316.hg	401	TC09000316.hg	PIP5K1B	6.3527	0.809681	1.73863	-2.13225	0.861749	28.4734	0 .	1 x 42	9 q21	phosphatidylinositol-4-phosphate 5-kinase type 1 beta
TC06001354.hg	402	TC06001354.hg	H3C8	5.85731	0.519826	1.73751	-1.16005	0.625569	13.4413	0 .	2 x 38	6 p22	H3 clustered histone 8
TC01000936.hg	403	TC01000936.hg	GPSM2	8.21092	1.09176	1.73749	-4.09595	0.809041	23.0744	0 .	1 x 44	1 p13	G protein signaling modulator 2
TC11000329.hg	404	TC11000329.hg	EHF	8.12799	1.06455	1.73693	-3.99668	0.821742	24.1724	0 .	1 x 44	11 p13	ETS homologous factor
TC20000384.hg	405	TC20000384.hg	CSE1L	8.662	0.657725	1.73301	-2.04	0.767782	20.0877	0 .	2 x 40	20 q13	chromosome segregation 1 like
TC01001045.hg	406	TC01001045.hg	FAM72B	6.31651	0.534976	1.73222	-1.16586	0.690512	16.0027	0 .	1 x 38	1 p11	family with sequence similarity 72 member B
TC12002644.hg	407	TC12002644.hg	BRI3BP	7.4144	0.715344	1.73	-1.7996	0.814594	23.5419	0 .	1 x 40	12 q24	BRI3 binding protein
TC07002083.hg	408	TC07002083.hg	NCAPG2	6.63266	0.622103	1.72943	-1.30296	0.80558	22.792	0 .	1 x 39	7 q36	non-SMC condensin II complex subunit G2
TC15002760.hg	409	TC15002760.hg	ARHGAP11B	6.77923	0.746643	1.72665	-2.3473	0.775163	20.5681	0 .	1 x 39	15 q13	Rho GTPase activating protein 11B
TC19001575.hg	410	TC19001575.hg		8.64192	0.890033	1.72607	-3.06935	0.71118	16.9579	0 .	1 x 44
TC03001374.hg	411	TC03001374.hg	CDC25A	5.78925	0.552414	1.72592	-1.23736	0.763399	19.8117	0 .	1 x 38	3 p21	cell division cycle 25A
TC08001438.hg	412	TC08001438.hg	CCNE2	5.10994	0.617164	1.72485	-1.16066	0.702727	16.5573	0 .	1 x 38	8 q22	cyclin E2
TC02002204.hg	413	TC02002204.hg	BUB1	6.68478	0.864368	1.72429	-2.35336	0.862844	28.6148	0 .	1 x 39	2 q13	BUB1 mitotic checkpoint serine/threonine kinase
TC15000337.hg	414	TC15000337.hg	WDR76	6.7194	0.586269	1.7241	-1.30311	0.691854	16.0623	0 .	1 x 38	15 q15	WD repeat domain 76
TC05003057.hg	415	TC05003057.hg	OCLN	8.74442	1.00923	1.72246	-5.05246	0.738368	18.3531	0 .	1 x 43	CHR_HSCHR5_2_CTG1_1 q13	occludin
TC01003787.hg	416	TC01003787.hg	IRF6	7.46898	0.703973	1.71891	-2.37185	0.707232	16.769	0 .	1 x 44	1 q32	interferon regulatory factor 6
TC0X001916.hg	417	TC0X001916.hg	HMGB3	7.93249	0.732122	1.71836	-2.53949	0.743155	18.6178	0 .	1 x 39	X q28	high mobility group box 3
TC21000762.hg	418	TC21000762.hg	H2BC12	10.5676	0.630468	1.71709	-2.09245	0.728944	17.8496	0 .	1 x 39	6 p22	H2B clustered histone 12
TC15000751.hg	419	TC15000751.hg	ABHD17C	7.44742	0.811046	1.71304	-2.68186	0.86911	29.4549	0 .	1 x 43	15 q25	abhydrolase domain containing 17C
TC0X000475.hg	420	TC0X000475.hg	CENPI	5.88764	0.722395	1.71082	-1.63017	0.822373	24.2298	0 .	1 x 39	X q22	centromere protein I
TC03001632.hg	421	TC03001632.hg	CIP2A	5.6586	0.669188	1.71052	-1.58173	0.739409	18.4102	0 .	1 x 38	3 q13	cell proliferation regulating inhibitor of protein phosphatase 2A
TC06001959.hg	422	TC06001959.hg	MMS22L	5.37688	0.530519	1.70931	-1.37314	0.754207	19.2539	0 .	1 x 38	6 q16	MMS22 like, DNA repair protein
TC02001303.hg	423	TC02001303.hg	VIL1	8.97634	0.954714	1.70379	-3.29354	0.890138	32.7446	0 .	1 x 44	2 q35	villin 1
TC05001458.hg	424	TC05001458.hg	OCLN	8.60149	0.995196	1.70238	-5.1553	0.739577	18.4194	0 .	1 x 43	CHR_HSCHR5_2_CTG1_1 q13	occludin
TC01001311.hg	425	TC01001311.hg	RAB25	8.20608	0.824566	1.70172	-2.88243	0.793859	21.8836	0 .	1 x 43	1 q22	RAB25, member RAS oncogene family
TC12002388.hg	426	TC12002388.hg	ERBB3	6.82575	0.865789	1.68976	-3.9102	0.742003	18.5536	0 .	1 x 44	12 q13	erb-b2 receptor tyrosine kinase 3
TC02004129.hg	427	TC02004129.hg	SLC5A6	7.90903	0.68337	1.68952	-1.61938	0.694465	16.1792	0 .	2 x 41	2 p23	solute carrier family 5 member 6
TC20000840.hg	428	TC20000840.hg		11.3442	0.776286	1.68935	-2.77938	0.606399	12.7837	0 .	1 x 45	20 q11	small nucleolar RNA host gene 17
TC05000612.hg	429	TC05000612.hg	SLC12A2	10.1396	1.0013	1.68757	-4.38322	0.801612	22.4765	0 .	1 x 44	5 q23	solute carrier family 12 member 2
TC17001769.hg	430	TC17001769.hg	BRIP1	6.00694	0.726617	1.68583	-1.7701	0.807866	22.9777	0 .	1 x 39	17 q23	BRCA1 interacting protein C-terminal helicase 1
TC02003597.hg	431	TC02003597.hg	MGAT5	8.34536	0.786603	1.68582	-3.31978	0.533593	10.5761	0 .	2 x 45	2 q21	alpha-1,6-mannosylglycoprotein 6-beta-N-acetylglucosaminyltransferase
TC11001059.hg	432	TC11001059.hg	TMPRSS4	7.83173	0.799279	1.67953	-2.2954	0.735788	18.213	0 .	1 x 43	11 q23	transmembrane serine protease 4
TC11003470.hg	433	TC11003470.hg	CHEK1	6.32854	0.564274	1.67907	-1.42087	0.819803	23.9981	0 .	1 x 39	11 q24	checkpoint kinase 1
TC01003194.hg	434	TC01003194.hg	H2AC21	6.8069	0.518622	1.67492	-1.2745	0.578161	11.8783	0 .	2 x 38	1 q21	H2A clustered histone 21
TC07003059.hg	435	TC07003059.hg	CYP51A1	8.76424	0.787455	1.67231	-2.38686	0.716935	17.239	0 .	1 x 41	7 q21	novel protein
TC01001791.hg	436	TC01001791.hg	CENPF	7.36542	0.933321	1.6714	-3.14463	0.872611	29.9492	0 .	1 x 40	1 q41	centromere protein F
TC06001341.hg	437	TC06001341.hg	H4C2	4.49805	0.587114	1.67031	-1.56048	0.697491	16.3162	0 .	1 x 38	6 p22	H4 clustered histone 2
TC01002916.hg	438	TC01002916.hg	SASS6	6.03703	0.579645	1.67009	-1.24815	0.760644	19.6416	0 .	1 x 38	1 p21	SAS-6 centriolar assembly protein
TC04000590.hg	439	TC04000590.hg	UGT8	7.21499	0.977703	1.66927	-2.9796	0.875286	30.3398	0 .	1 x 43	4 q26	UDP glycosyltransferase 8
TC05001316.hg	440	TC05001316.hg	HMGCS1	8.0179	0.798392	1.66516	-2.27064	0.646782	14.2158	0 .	1 x 40	5 p12	3-hydroxy-3-methylglutaryl-CoA synthase 1
TC06001672.hg	441	TC06001672.hg	BNIP5	6.51298	0.637806	1.66295	-1.32833	0.67001	15.1295	0 .	2 x 41	6 p21	BCL2 interacting protein 5
TC09000498.hg	442	TC09000498.hg	GALNT12	7.38307	0.639563	1.66113	-2.53171	0.696063	16.2513	0 .	2 x 41	9 q22	polypeptide N-acetylgalactosaminyltransferase 12
TC20000169.hg	443	TC20000169.hg	GINS1	6.73817	0.557749	1.65998	-1.32841	0.756277	19.3771	0 .	1 x 39	20 p11	GINS complex subunit 1
TC13000584.hg	444	TC13000584.hg	PROSER1	8.16577	0.800498	1.65918	-2.37147	0.745822	18.768	0 .	2 x 45	13 q13	proline and serine rich 1
TC11002579.hg	445	TC11002579.hg	NCR3LG1	5.62973	0.634512	1.65553	-1.45105	0.659748	14.7167	0 .	3 x 41	11 p15	natural killer cell cytotoxicity receptor 3 ligand 1
TC11002038.hg	446	TC11002038.hg	DHCR7	8.49083	0.724085	1.65375	-1.99352	0.605942	12.7685	0 .	2 x 39	11 q13	7-dehydrocholesterol reductase
TC05002611.hg	447	TC05002611.hg	SLC12A2	10.2778	1.0448	1.65057	-4.76748	0.798045	22.2	0 .	1 x 44	5 q23	solute carrier family 12 member 2
TC07000524.hg	448	TC07000524.hg	DBF4	6.34265	0.594682	1.65051	-1.69115	0.802707	22.5628	0 .	1 x 38	7 q21	DBF4 zinc finger
TC06002965.hg	449	TC06002965.hg	CRYBG1	7.17022	0.595002	1.65009	-1.40159	0.67206	15.2138	0 .	1 x 39	6 q21	crystallin beta-gamma domain containing 1
TC13000320.hg	450	TC13000320.hg		9.70875	0.852814	1.64308	-3.47707	0.689371	15.9523	0 .	1 x 43	13 q31	keratin 18 pseudogene 27
TC0X001190.hg	451	TC0X001190.hg	POF1B	9.21709	1.37303	1.6414	-5.75753	0.875787	30.4141	0 .	1 x 44	X q21	POF1B actin binding protein
TC19001394.hg	452	TC19001394.hg	RHPN2	8.15849	0.7052	1.64107	-2.32743	0.794585	21.938	0 .	1 x 43	19 q13	rhophilin Rho GTPase binding protein 2
TC12001253.hg	453	TC12001253.hg	MANSC1	8.20331	0.81934	1.64037	-3.06455	0.769425	20.1928	0 .	1 x 44	12 p13	MANSC domain containing 1
TC12000974.hg	454	TC12000974.hg	KNTC1	6.58658	0.617316	1.63999	-1.63695	0.686788	15.8389	0 .	1 x 38	12 q24	kinetochore associated 1
TC14001223.hg	455	TC14001223.hg	GPX2	7.86619	0.820058	1.63963	-3.1705	0.783935	21.1666	0 .	1 x 44	14 q23	glutathione peroxidase 2
TC06003166.hg	456	TC06003166.hg	ACAT2	8.01705	0.754293	1.63833	-1.86879	0.595019	12.4103	0 .	1 x 38	6 q25	acetyl-CoA acetyltransferase 2
TC02002376.hg	457	TC02002376.hg	MCM6	7.25678	0.610925	1.63795	-1.75693	0.713388	17.0649	0 .	1 x 38	2 q21	minichromosome maintenance complex component 6
TC18000175.hg	458	TC18000175.hg	LIPG	7.14537	0.647433	1.63683	-1.49639	0.527296	10.4028	0 .	3 x 39	18 q21	lipase G, endothelial type
TC06002615.hg	459	TC06002615.hg	SOX4	9.20643	0.832364	1.63501	-4.04223	0.639231	13.934	0 .	2 x 45	6 p22	SRY-box transcription factor 4
TC17002906.hg	460	TC17002906.hg	KRT19	9.10258	0.859461	1.63227	-2.76706	0.733537	18.0922	0 .	1 x 44	17 q21	keratin 19
TC06003537.hg	461	TC06003537.hg	H1-2	8.87832	0.617496	1.63216	-1.86261	0.750417	19.0317	0 .	1 x 39	6 p22	H1.2 linker histone, cluster member
TC17001632.hg	462	TC17001632.hg	PRR15L	7.69532	0.998837	1.62683	-3.34808	0.813995	23.4907	0 .	1 x 43	17 q21	proline rich 15 like
TC0Y000182.hg	463	TC0Y000182.hg	CD24	8.81246	0.993977	1.62586	-4.18106	0.763634	19.8263	0 .	1 x 44	6 q21	CD24 molecule
TC17002645.hg	464	TC17002645.hg	BRCA1	6.28602	0.679373	1.6253	-1.51024	0.809723	23.1308	0 .	1 x 39	17 q21	BRCA1 DNA repair associated
TC06001350.hg	465	TC06001350.hg	H2BC8	6.94203	0.73584	1.61603	-2.77572	0.636981	13.8514	0 .	1 x 40	6 p22	H2B clustered histone 8
TC12003243.hg	466	TC12003243.hg	ERBB3	8.62494	0.797796	1.61574	-3.03031	0.765515	19.9441	0 .	1 x 44	12 q13	erb-b2 receptor tyrosine kinase 3
TC12000818.hg	467	TC12000818.hg	C12orf75	6.49123	0.67403	1.6152	-2.15706	0.684071	15.721	0 .	1 x 41	12 q23	chromosome 12 open reading frame 75
TC0X000376.hg	468	TC0X000376.hg	KIF4A	6.78495	0.687349	1.60989	-1.83118	0.868713	29.4	0 .	1 x 39	X q13	kinesin family member 4A
TC12001489.hg	469	TC12001489.hg	RACGAP1	7.21904	0.619052	1.60529	-1.93356	0.837822	25.7251	0 .	1 x 39	12 q13	Rac GTPase activating protein 1
TC09002454.hg	470	TC09002454.hg	BAG1	6.22974	0.655854	1.60499	-2.17647	0.697671	16.3244	0 .	2 x 41	9 p13	BCL2 associated athanogene 1
TC02000057.hg	471	TC02000057.hg	RRM2	7.43418	0.650493	1.60293	-1.47187	0.793883	21.8855	0 .	1 x 39	2 p25	ribonucleotide reductase regulatory subunit M2
TC05000218.hg	472	TC05000218.hg	ITGA2	8.8812	0.871771	1.6023	-4.66494	0.611407	12.9519	0 .	1 x 44	5 q11	integrin subunit alpha 2
TC05002454.hg	473	TC05002454.hg	HMGCR	9.22082	0.730939	1.60213	-1.95648	0.754735	19.2852	0 .	1 x 40	5 q13	3-hydroxy-3-methylglutaryl-CoA reductase
TC08000520.hg	474	TC08000520.hg	CHMP4C	7.81763	0.866212	1.60199	-2.4991	0.755197	19.3127	0 .	1 x 44	8 q21	charged multivesicular body protein 4C
TC03001926.hg	475	TC03001926.hg	PLCH1	5.61912	0.620944	1.59907	-1.77115	0.794173	21.9071	0 .	1 x 41	3 q25	phospholipase C eta 1
TC20000839.hg	476	TC20000839.hg		11.4445	0.819607	1.59802	-2.91959	0.523267	10.2932	0 .	1 x 45	20 q11	small nucleolar RNA host gene 17
TC01003798.hg	477	TC01003798.hg	NEK2	5.86279	0.707442	1.59529	-1.87327	0.834152	25.3527	0 .	1 x 39	1 q32	NIMA related kinase 2
TC06000149.hg	478	TC06000149.hg	GMNN	6.53832	0.547212	1.5936	-1.33853	0.677401	15.4365	0 .	1 x 38	6 p22	geminin DNA replication inhibitor
TC04001808.hg	479	TC04001808.hg	CENPU	5.28034	0.616173	1.59148	-1.31338	0.728764	17.8401	0 .	1 x 38	4 q35	centromere protein U
TC09001468.hg	480	TC09001468.hg	PTPN3	7.73434	0.744398	1.59142	-2.77036	0.695567	16.2289	0 .	1 x 45	9 q31	protein tyrosine phosphatase non-receptor type 3
TC11003331.hg	481	TC11003331.hg	EXPH5	7.06735	0.756869	1.59071	-2.2144	0.68583	15.7972	0 .	1 x 42	11 q22	exophilin 5
TC15001858.hg	482	TC15001858.hg	PRC1	7.27847	0.795353	1.5905	-2.24032	0.84463	26.4473	0 .	1 x 40	15 q26	novel protein
TC0X000357.hg	483	TC0X000357.hg	HEPH	8.0686	0.749208	1.5899	-2.59304	0.658095	14.6516	0 .	1 x 43	X q12	hephaestin
TC02001347.hg	484	TC02001347.hg	SGPP2	7.50014	0.678262	1.58964	-2.00523	0.686131	15.8103	0 .	1 x 41	2 q36	sphingosine-1-phosphate phosphatase 2
TC06000747.hg	485	TC06000747.hg	MYO6	8.21158	0.653144	1.58904	-2.55778	0.729759	17.8922	0 .	2 x 43	6 q14	myosin VI
TC01006023.hg	486	TC01006023.hg	ASPM	8.16976	0.906819	1.5883	-2.69751	0.854157	27.5343	0 .	1 x 40	1 q31	abnormal spindle microtubule assembly
TC11002269.hg	487	TC11002269.hg	EXPH5	7.17737	0.847562	1.58827	-2.67236	0.695356	16.2193	0 .	1 x 43	11 q22	exophilin 5
TC08000575.hg	488	TC08000575.hg	ESRP1	8.20104	1.06671	1.587	-3.81147	0.898615	34.3338	0 .	1 x 43	8 q22	epithelial splicing regulatory protein 1
TC16001031.hg	489	TC16001031.hg	DCTPP1	8.65165	0.533994	1.58687	-1.46378	0.782128	21.0407	0 .	2 x 40	16 p11	dCTP pyrophosphatase 1
TC06000172.hg	490	TC06000172.hg	H4C5	8.38468	0.542312	1.58571	-2.03907	0.659787	14.7182	0 .	1 x 38	6 p22	H4 clustered histone 5
TC03001719.hg	491	TC03001719.hg	MUC13	10.2578	1.47471	1.58518	-6.10668	0.842449	26.2112	0 .	1 x 44	3 q21	mucin 13, cell surface associated
TC02003949.hg	492	TC02003949.hg	SH3YL1	8.77986	0.750457	1.58305	-2.23733	0.689193	15.9444	0 .	1 x 44	2 p25	SH3 and SYLF domain containing 1
TC12002032.hg	493	TC12002032.hg	CIT	6.87279	0.571592	1.58019	-1.40191	0.792468	21.7804	0 .	1 x 39	12 q24	citron rho-interacting serine/threonine kinase
TC10002226.hg	494	TC10002226.hg	HELLS	7.04391	0.642018	1.57956	-1.84108	0.741355	18.5176	0 .	1 x 39	10 q23	helicase, lymphoid specific
TC20000592.hg	495	TC20000592.hg	PCNA	7.84115	0.653775	1.57521	-1.70952	0.720437	17.4136	0 .	1 x 38	20 p12	proliferating cell nuclear antigen
TC01000700.hg	496	TC01000700.hg	HOOK1	7.30229	0.803431	1.57507	-3.24702	0.792738	21.8004	0 .	1 x 42	1 p32	hook microtubule tethering protein 1
TC06001430.hg	497	TC06001430.hg	H2AC17	4.28451	0.618687	1.57356	-1.73537	0.771938	20.3556	0 .	1 x 39	6 p22	H2A clustered histone 17
TC11000854.hg	498	TC11000854.hg	DDIAS	5.37796	0.534869	1.57167	-1.0106	0.772313	20.3801	0 .	1 x 38	11 q14	DNA damage induced apoptosis suppressor
TC07001635.hg	499	TC07001635.hg	BAIAP2L1	8.29345	0.68197	1.57117	-2.3237	0.78201	21.0326	0 .	1 x 44	7 q22	BAR/IMD domain containing adaptor protein 2 like 1
TC07001250.hg	500	TC07001250.hg		6.62688	0.57622	1.57071	-1.40428	0.762102	19.7313	0 .	1 x 38
TC15000868.hg	501	TC15000868.hg	BLM	6.00421	0.60584	1.5666	-1.53605	0.742723	18.5937	0 .	1 x 38	15 q26	BLM RecQ like helicase
TC04002268.hg	502	TC04002268.hg	FAM160A1	5.57679	0.654541	1.56244	-2.15397	0.739515	18.416	0 .	1 x 43	4 q31	family with sequence similarity 160 member A1
TC02003490.hg	503	TC02003490.hg		7.92691	0.742477	1.55973	-2.41465	0.821986	24.1945	0 .	1 x 43	2 q13	long intergenic non-protein coding RNA 1123
TC09000574.hg	504	TC09000574.hg	BSPRY	7.30534	0.566045	1.55937	-1.38756	0.772499	20.3923	0 .	2 x 41	9 q32	B-box and SPRY domain containing
TC03002690.hg	505	TC03002690.hg	B3GNT5	4.49557	0.562179	1.55912	-1.77665	0.626907	13.4886	0 .	3 x 41	3 q27	UDP-GlcNAc:betaGal beta-1,3-N-acetylglucosaminyltransferase 5
TC06001213.hg	506	TC06001213.hg	GMDS	8.17836	0.715277	1.55622	-2.35008	0.738164	18.342	0 .	1 x 41	6 p25	GDP-mannose 4,6-dehydratase
TC01005333.hg	507	TC01005333.hg	IL22RA1	7.315	0.63073	1.55513	-2.08772	0.623104	13.3546	0 .	2 x 44	1 p36	interleukin 22 receptor subunit alpha 1
TC07001264.hg	508	TC07001264.hg	NT5C3A	6.3661	0.540364	1.55463	-1.56653	0.743398	18.6314	0 .	3 x 40	7 p14	5'-nucleotidase, cytosolic IIIA
TC06004064.hg	509	TC06004064.hg	H3C10	5.57138	0.64585	1.55424	-2.00281	0.664164	14.8925	0 .	1 x 39	6 p22	H3 clustered histone 10
TC11003373.hg	510	TC11003373.hg	MPZL3	5.98972	0.694664	1.55119	-1.99856	0.629546	13.5825	0 .	2 x 43	11 q23	myelin protein zero like 3
TC04000462.hg	511	TC04000462.hg	CDS1	6.76845	0.815088	1.55074	-2.62833	0.871003	29.7198	0 .	1 x 43	4 q21	CDP-diacylglycerol synthase 1
TC17001083.hg	512	TC17001083.hg	CLDN7	9.21757	0.790156	1.55002	-2.62255	0.875214	30.3291	0 .	1 x 43	17 p13	claudin 7
TC15000846.hg	513	TC15000846.hg	FANCI	6.67966	0.794856	1.54939	-1.97271	0.853281	27.4303	0 .	1 x 40	15 q26	FA complementation group I
TC04000645.hg	514	TC04000645.hg	PLK4	4.78858	0.57003	1.5492	-1.22068	0.798231	22.2143	0 .	1 x 38	4 q28	polo like kinase 4
TC02001948.hg	515	TC02001948.hg	GFPT1	9.87055	0.680054	1.54884	-2.36997	0.826065	24.5706	0 .	1 x 41	2 p13	glutamine--fructose-6-phosphate transaminase 1
TC12000925.hg	516	TC12000925.hg	RFC5	6.36019	0.509597	1.54718	-1.29428	0.757231	19.4344	0 .	1 x 38	12 q24	replication factor C subunit 5
TC05001408.hg	517	TC05001408.hg	CENPK	5.12687	0.584453	1.54502	-1.52389	0.743681	18.6473	0 .	1 x 39	5 q12	centromere protein K
TC01002658.hg	518	TC01002658.hg	ORC1	5.79545	0.475508	1.54498	-0.913282	0.748913	18.9447	0 .	1 x 38	1 p32	origin recognition complex subunit 1
TC10001136.hg	519	TC10001136.hg	MPP7	6.43738	0.5426	1.54109	-1.25069	0.680917	15.5855	0 .	3 x 40	10 p12	membrane palmitoylated protein 7
TC01000896.hg	520	TC01000896.hg	SLC35A3	7.99364	0.577589	1.53526	-2.07576	0.760048	19.6051	0 .	3 x 41	1 p21	solute carrier family 35 member A3
TC06002043.hg	521	TC06002043.hg	FRK	7.4522	0.752074	1.53423	-2.998	0.782214	21.0467	0 .	1 x 43	6 q22	fyn related Src family tyrosine kinase
TC05000304.hg	522	TC05000304.hg	OCLN	8.50569	0.808153	1.53182	-3.84335	0.750059	19.011	0 .	1 x 43	CHR_HSCHR5_2_CTG1_1 q13	occludin
TC08002367.hg	523	TC08002367.hg		4.96195	0.507019	1.52671	-1.06511	0.719818	17.3826	0 .	1 x 38	8 q13	pituitary tumor-transforming 3, pseudogene
TC06001428.hg	524	TC06001428.hg	H4C13	6.35012	0.653244	1.52669	-1.59226	0.499983	9.67772	0 .	2 x 39	6 p22	H4 clustered histone 13
TC04000770.hg	525	TC04000770.hg	TRIM2	7.77553	0.789889	1.52193	-2.66995	0.83383	25.3206	0 .	1 x 44	4 q31	tripartite motif containing 2
TC01000288.hg	526	TC01000288.hg	EPHB2	8.55125	0.568742	1.52124	-1.7449	0.715163	17.1517	0 .	3 x 41	1 p36	EPH receptor B2
TC05000010.hg	527	TC05000010.hg	TRIP13	6.41415	0.545194	1.52115	-1.3016	0.802535	22.5491	0 .	1 x 39	5 p15	thyroid hormone receptor interactor 13
TC06001426.hg	528	TC06001426.hg	H1-5	3.73872	0.526823	1.52028	-1.14022	0.574516	11.7663	0 .	2 x 38	6 p22	H1.5 linker histone, cluster member
TC02004497.hg	529	TC02004497.hg		8.03277	0.698983	1.51664	-2.32533	0.802461	22.5433	0 .	1 x 43	2 q13	long intergenic non-protein coding RNA 1123
TC16001171.hg	530	TC16001171.hg	CMTM4	8.11537	0.61739	1.51557	-1.88408	0.823547	24.3371	0 .	2 x 42	16 q22	CKLF like MARVEL transmembrane domain containing 4
TC01005497.hg	531	TC01005497.hg	NDC1	7.57119	0.673169	1.51398	-1.71081	0.820807	24.0881	0 .	1 x 39	1 p32	NDC1 transmembrane nucleoporin
TC10000813.hg	532	TC10000813.hg	ACSL5	9.58718	0.777057	1.51165	-2.67587	0.778573	20.7971	0 .	1 x 44	10 q25	acyl-CoA synthetase long chain family member 5
TC08000629.hg	533	TC08000629.hg	GRHL2	7.52485	0.820207	1.50822	-2.56726	0.859117	28.14	0 .	1 x 43	8 q22	grainyhead like transcription factor 2
TC01001781.hg	534	TC01001781.hg	FLVCR1	6.88109	0.609882	1.50821	-1.65938	0.780591	20.9347	0 .	1 x 40	1 q32	feline leukemia virus subgroup C cellular receptor 1
TC18000538.hg	535	TC18000538.hg	ATP8B1	8.50207	0.696338	1.50602	-2.53087	0.72207	17.496	0 .	1 x 42	18 q21	ATPase phospholipid transporting 8B1
TC16000559.hg	536	TC16000559.hg	CDH1	10.442	0.947179	1.50564	-4.75509	0.801888	22.4982	0 .	1 x 44	16 q22	cadherin 1
TC02003381.hg	537	TC02003381.hg	ANAPC1	7.83843	0.605156	1.50116	-1.57313	0.826789	24.6386	0 .	1 x 39	2 p11	anaphase promoting complex subunit 1 (ANAPC1) pseudogene
TC06000176.hg	538	TC06000176.hg	H2BC9	6.12626	0.649568	1.50088	-1.79888	0.685834	15.7974	0 .	1 x 39	6 p22	H2B clustered histone 9
TC11002446.hg	539	TC11002446.hg	ARHGAP32	7.8642	0.727642	1.49755	-2.27616	0.727016	17.7493	0 .	1 x 42	11 q24	Rho GTPase activating protein 32
TC18000128.hg	540	TC18000128.hg	DSG2	10.0048	1.0493	1.49702	-4.60628	0.869724	29.5402	0 .	1 x 43	18 q12	desmoglein 2
TC02001570.hg	541	TC02001570.hg	ODC1	8.95928	0.675962	1.49487	-2.06428	0.742435	18.5776	0 .	1 x 39	2 p25	ornithine decarboxylase 1
TC01000476.hg	542	TC01000476.hg	CDCA8	6.42197	0.549137	1.49449	-1.27859	0.786716	21.3631	0 .	1 x 39	1 p34	cell division cycle associated 8
TC12002052.hg	543	TC12002052.hg		6.51375	0.667478	1.49396	-2.05997	0.706476	16.7332	0 .	1 x 40	12 q24	novel transcript, antisense to MLEC
TC03000051.hg	544	TC03000051.hg	FANCD2	6.40592	0.604657	1.49107	-1.55456	0.829426	24.8895	0 .	1 x 39	3 p25	FA complementation group D2
TC05000604.hg	545	TC05000604.hg	LMNB1	7.64115	0.641878	1.4883	-1.67227	0.828948	24.8437	0 .	1 x 39	5 q23	lamin B1
TC07003219.hg	546	TC07003219.hg	ARHGEF5	8.44748	0.764187	1.48817	-2.33759	0.682701	15.6619	0 .	2 x 45	7 q35	Rho guanine nucleotide exchange factor 5
TC15000633.hg	547	TC15000633.hg	GLCE	7.72276	0.603448	1.48789	-1.67732	0.700276	16.4438	0 .	3 x 41	15 q23	glucuronic acid epimerase
TC07003361.hg	548	TC07003361.hg	CYP51A1	8.77056	0.729734	1.48562	-2.18216	0.711218	16.9597	0 .	1 x 40	7 q21	novel protein
TC03000050.hg	549	TC03000050.hg		6.74786	0.467183	1.48532	-1.41763	0.697765	16.3287	0 .	2 x 38	3 p25	EMC3 antisense RNA 1
TC19000709.hg	550	TC19000709.hg	FUT2	6.79127	0.603069	1.48401	-1.93234	0.757457	19.448	0 .	1 x 43	19 q13	fucosyltransferase 2
TC11001192.hg	551	TC11001192.hg	TMEM45B	8.98216	0.836296	1.48396	-2.93703	0.773683	20.4701	0 .	1 x 44	11 q24	transmembrane protein 45B
TC04001824.hg	552	TC04001824.hg	FAT1	9.4763	0.639252	1.48174	-2.48592	0.601471	12.6205	0 .	2 x 43	4 q35	FAT atypical cadherin 1
TC06000167.hg	553	TC06000167.hg	H2AC6	7.5902	0.577113	1.48036	-1.83642	0.562291	11.3983	0 .	3 x 39	6 p22	H2A clustered histone 6
TC01001717.hg	554	TC01001717.hg	FAM72B	6.38311	0.469339	1.47981	-1.11846	0.674537	15.3165	0 .	1 x 38	1 p11	family with sequence similarity 72 member B
TC01006052.hg	555	TC01006052.hg	PLEKHA6	8.29822	0.65894	1.4774	-2.30213	0.626223	13.4644	0 .	2 x 44	1 q32	pleckstrin homology domain containing A6
TC07000059.hg	556	TC07000059.hg	AIMP2	8.22008	0.487242	1.47496	-1.26281	0.738677	18.37	0 .	2 x 38	7 p22	aminoacyl tRNA synthetase complex interacting multifunctional protein 2
TC12002970.hg	557	TC12002970.hg	E2F7	5.6693	0.471283	1.47277	-1.16514	0.699701	16.4173	0 .	2 x 38	12 q21	E2F transcription factor 7
TC02000546.hg	558	TC02000546.hg	RPIA	7.6481	0.575035	1.47142	-1.88894	0.844906	26.4775	0 .	2 x 41	2 p11	ribose 5-phosphate isomerase A
TC10000418.hg	559	TC10000418.hg	HKDC1	7.32029	0.732508	1.47117	-2.32855	0.743047	18.6118	0 .	1 x 43	10 q22	hexokinase domain containing 1
TC17002860.hg	560	TC17002860.hg	KPNA2	9.10541	0.700127	1.47027	-2.16148	0.742276	18.5688	0 .	1 x 39	17 q24	karyopherin subunit alpha 2
TC11000541.hg	561	TC11000541.hg	FEN1	7.3521	0.430249	1.47025	-1.14345	0.749006	18.9501	0 .	2 x 38	11 q12	flap structure-specific endonuclease 1
TC01002676.hg	562	TC01002676.hg	NDC1	7.23831	0.623498	1.46989	-1.56494	0.822551	24.2459	0 .	1 x 39	1 p32	NDC1 transmembrane nucleoporin
TC02001479.hg	563	TC02001479.hg	FARP2	8.16937	0.558168	1.46699	-2.03725	0.787794	21.4402	0 .	2 x 40	2 q37	FERM, ARH/RhoGEF and pleckstrin domain protein 2
TC06002644.hg	564	TC06002644.hg	H4C5	11.5932	0.524029	1.46282	-2.27598	0.672406	15.2281	0 .	1 x 38	6 p22	H4 clustered histone 5
TC6_qbl_hap6000101.hg	565	TC6_qbl_hap6000101.hg	KIFC1	6.67011	0.471878	1.4628	-1.16821	0.789071	21.5322	0 .	1 x 38	6 p21	kinesin family member C1
TC03002221.hg	566	TC03002221.hg		5.72832	0.495397	1.46275	-1.21358	0.784961	21.2387	0 .	1 x 38	CHR_HSCHR3_1_CTG1 p25	Fanconi anemia, complementation group D2 (FANCD2) pseudogene
TC12000276.hg	567	TC12000276.hg	FAR2	7.20101	0.595675	1.46044	-2.29252	0.695353	16.2192	0 .	3 x 41	12 p11	fatty acyl-CoA reductase 2
TC09002738.hg	568	TC09002738.hg	PTPN3	8.27938	0.767685	1.45834	-2.82586	0.709461	16.8752	0 .	1 x 45	9 q31	protein tyrosine phosphatase non-receptor type 3
TC15000276.hg	569	TC15000276.hg	BUB1B	6.32595	0.553129	1.45722	-1.38846	0.848924	26.9256	0 .	1 x 39	15 q15	BUB1 mitotic checkpoint serine/threonine kinase B
TC11001498.hg	570	TC11001498.hg	FANCF	7.25097	0.599304	1.45623	-1.7648	0.780033	20.8965	0 .	2 x 41	11 p14	FA complementation group F
TC07003019.hg	571	TC07003019.hg	ABHD11	7.45609	0.573758	1.45604	-1.88503	0.755816	19.3496	0 .	2 x 42	7 q11	abhydrolase domain containing 11
TC12001002.hg	572	TC12001002.hg	BRI3BP	8.12922	0.47288	1.45512	-1.30361	0.75877	19.5273	0 .	2 x 39	12 q24	BRI3 binding protein
TC03002732.hg	573	TC03002732.hg	HES1	7.91924	0.668526	1.45501	-2.83192	0.645991	14.186	0 .	2 x 45	3 q29	hes family bHLH transcription factor 1
TC01003702.hg	574	TC01003702.hg	UBE2T	6.82649	0.612009	1.45487	-1.59204	0.829299	24.8774	0 .	1 x 39	1 q32	ubiquitin conjugating enzyme E2 T
TC08000695.hg	575	TC08000695.hg	MAL2	8.92875	0.647236	1.45453	-1.83461	0.816179	23.6789	0 .	1 x 42	8 q24	mal, T cell differentiation protein 2 (gene/pseudogene)
TC07001993.hg	576	TC07001993.hg	EZH2	6.65157	0.543963	1.45384	-1.5009	0.810656	23.2084	0 .	1 x 39	7 q36	enhancer of zeste 2 polycomb repressive complex 2 subunit
TC0X000628.hg	577	TC0X000628.hg	STK26	7.60616	0.601656	1.45358	-2.37503	0.632702	13.6959	0 .	3 x 40	X q26	serine/threonine kinase 26
TC15000292.hg	578	TC15000292.hg	RAD51	5.93857	0.425274	1.45141	-0.870111	0.770011	20.2306	0 .	2 x 38	15 q15	RAD51 recombinase
TC02002813.hg	579	TC02002813.hg	FARSB	7.92223	0.544166	1.45085	-1.54438	0.868756	29.406	0 .	1 x 39	2 q36	phenylalanyl-tRNA synthetase subunit beta
TC06001429.hg	580	TC06001429.hg	H3C12	7.56595	0.669208	1.44728	-2.65049	0.759241	19.5559	0 .	1 x 39	6 p22	H3 clustered histone 12
TC20000818.hg	581	TC20000818.hg	DSN1	6.51437	0.503304	1.4467	-1.18465	0.704361	16.6336	0 .	3 x 39	20 q11	DSN1 component of MIS12 kinetochore complex
TC02002200.hg	582	TC02002200.hg		8.03283	0.656751	1.44433	-2.05014	0.784845	21.2305	0 .	2 x 42	2 q13	long intergenic non-protein coding RNA 1123
TC07002605.hg	583	TC07002605.hg	NUP205	7.75606	0.543881	1.44127	-1.44506	0.816741	23.7279	0 .	1 x 38	7 q33	nucleoporin 205
TC02000674.hg	584	TC02000674.hg		7.68644	0.619934	1.43826	-1.89776	0.789532	21.5656	0 .	2 x 42	2 q13	long intergenic non-protein coding RNA 1123
TC15002422.hg	585	TC15002422.hg		7.65195	0.545867	1.43666	-1.60543	0.761622	19.7017	0 .	2 x 42	15 q11	rhophilin Rho GTPase binding protein 2 pseudogene 1
TC01001174.hg	586	TC01001174.hg	H2AC18	10.7033	0.648208	1.4349	-2.60995	0.68763	15.8758	0 .	1 x 39	1 q21	H2A clustered histone 18
TC12001756.hg	587	TC12001756.hg	E2F7	5.72633	0.45993	1.43465	-1.0787	0.717585	17.2713	0 .	2 x 38	12 q21	E2F transcription factor 7
TC07003306.hg	588	TC07003306.hg	ARHGEF5	8.18091	0.744591	1.4341	-2.22193	0.677935	15.459	0 .	2 x 45	7 q35	Rho guanine nucleotide exchange factor 5
TC12002391.hg	589	TC12002391.hg		8.30542	0.60885	1.43184	-1.52915	0.775017	20.5584	0 .	1 x 38	12 q13	heat shock protein family D (Hsp60) member 1 pseudogene 4
TC12001614.hg	590	TC12001614.hg	PRIM1	6.07991	0.659843	1.43079	-1.78689	0.746382	18.7998	0 .	1 x 38	12 q13	DNA primase subunit 1
TC06003872.hg	591	TC06003872.hg	MAP7	9.16139	0.830304	1.42799	-3.52563	0.851904	27.2686	0 .	1 x 44	6 q23	microtubule associated protein 7
TC06001385.hg	592	TC06001385.hg	H2BC11	6.56998	0.524214	1.42675	-1.57874	0.696799	16.2847	0 .	1 x 38	6 p22	H2B clustered histone 11
TC02002507.hg	593	TC02002507.hg	SPC25	5.20838	0.528111	1.41969	-1.16769	0.805247	22.7652	0 .	1 x 39	2 q31	SPC25 component of NDC80 kinetochore complex
TC06001799.hg	594	TC06001799.hg	MCM3	8.22518	0.511118	1.41773	-1.28724	0.869597	29.5225	0 .	1 x 39	6 p12	minichromosome maintenance complex component 3
TC04000275.hg	595	TC04000275.hg	NIPAL1	6.76774	0.538453	1.41704	-1.53808	0.761742	19.7091	0 .	3 x 41	4 p12	NIPA like domain containing 1
TC09002783.hg	596	TC09002783.hg	STRBP	7.33352	0.588033	1.41118	-1.50761	0.861367	28.4244	0 .	2 x 41	9 q33	spermatid perinuclear RNA binding protein
TC01004760.hg	597	TC01004760.hg	CKS1B	7.63907	0.5773	1.40856	-1.65102	0.800638	22.4004	0 .	1 x 40	5 q12	CDC28 protein kinase regulatory subunit 1B pseudogene 3
TC04001507.hg	598	TC04001507.hg	MAD2L1	6.04567	0.591646	1.40638	-1.41332	0.841292	26.0879	0 .	1 x 39	4 q27	mitotic arrest deficient 2 like 1
TC20000357.hg	599	TC20000357.hg	UBE2C	6.9733	0.491884	1.40622	-1.32424	0.738902	18.3823	0 .	3 x 39	20 q13	ubiquitin conjugating enzyme E2 C
TC07001143.hg	600	TC07001143.hg	ICA1	6.84247	0.655387	1.40508	-2.07202	0.787385	21.4109	0 .	2 x 44	7 p21	islet cell autoantigen 1
TC05000363.hg	601	TC05000363.hg	HMGCR	7.80208	0.620636	1.40367	-1.56037	0.752069	19.128	0 .	1 x 40	5 q13	3-hydroxy-3-methylglutaryl-CoA reductase
TC12002051.hg	602	TC12002051.hg		7.2037	0.646123	1.40339	-1.73716	0.726016	17.6976	0 .	1 x 40	12 q24	novel transcript, antisense to MLEC
TC13001345.hg	603	TC13001345.hg		6.67036	0.53161	1.39188	-1.81483	0.679662	15.5321	0 .	3 x 39	13 q12	novel transcript, antisense to IL17D
TC07002203.hg	604	TC07002203.hg	CBX3	8.88815	0.616261	1.39051	-1.92245	0.785159	21.2527	0 .	1 x 39	7 p15	chromobox 3
TC06000270.hg	605	TC06000270.hg	H2BC17	6.81994	0.629776	1.38758	-2.06855	0.745502	18.7499	0 .	1 x 39	6 p22	H2B clustered histone 17
TC06000668.hg	606	TC06000668.hg	LRRC1	7.46504	0.728099	1.38733	-3.05915	0.860442	28.3067	0 .	1 x 42	6 p12	leucine rich repeat containing 1
TC19000014.hg	607	TC19000014.hg	MISP	8.01834	0.603811	1.38319	-1.72004	0.660466	14.7451	0 .	2 x 43	19 p13	mitotic spindle positioning
TC11000090.hg	608	TC11000090.hg	RRM1	7.47357	0.559985	1.38079	-1.37636	0.823435	24.3268	0 .	1 x 38	11 p15	ribonucleotide reductase catalytic subunit M1
TC0X001355.hg	609	TC0X001355.hg	ZDHHC9	8.9523	0.655615	1.37893	-2.42559	0.743656	18.6459	0 .	2 x 45	X q26	zinc finger DHHC-type containing 9
TC02003470.hg	610	TC02003470.hg	ANAPC1	6.52091	0.469403	1.37181	-1.22457	0.861641	28.4595	0 .	3 x 40	2 p11	anaphase promoting complex subunit 1 pseudogene 1
TC06000421.hg	611	TC06000421.hg	KIFC1	6.67805	0.461231	1.37168	-1.15582	0.787226	21.3995	0 .	1 x 38	6 p21	kinesin family member C1
TC6_ssto_hap7000090.hg	612	TC6_ssto_hap7000090.hg	KIFC1	6.67805	0.461231	1.37168	-1.15582	0.787226	21.3995	0 .	1 x 38	6 p21	kinesin family member C1
TC06000166.hg	613	TC06000166.hg	H4C3	9.71849	0.567856	1.36978	-1.64664	0.696398	16.2665	0 .	1 x 38	6 p22	H4 clustered histone 3
TC06001345.hg	614	TC06001345.hg	H1-2	6.78113	0.495216	1.36528	-1.33396	0.699769	16.4204	0 .	1 x 38	6 p22	H1.2 linker histone, cluster member
TC07002162.hg	615	TC07002162.hg	BZW2	8.14211	0.693423	1.36296	-2.34017	0.87672	30.5541	0 .	1 x 41	7 p21	basic leucine zipper and W2 domains 2
TC12000082.hg	616	TC12000082.hg	NCAPD2	8.21083	0.641945	1.35955	-1.96452	0.841108	26.0684	0 .	1 x 39	12 p13	non-SMC condensin I complex subunit D2
TC19000583.hg	617	TC19000583.hg	CEACAM5	12.0795	1.66594	1.35684	-7.20203	0.741475	18.5242	0 .	1 x 44	19 q13	CEA cell adhesion molecule 5
TC06000060.hg	618	TC06000060.hg	DSP	10.0696	0.870343	1.35024	-4.91001	0.783055	21.1051	0 .	1 x 44	6 p24	desmoplakin
TC10001855.hg	619	TC10001855.hg	NET1	8.01929	0.574074	1.35021	-1.98855	0.817369	23.7827	0 .	2 x 41	10 p15	neuroepithelial cell transforming 1
TC17001553.hg	620	TC17001553.hg	BRCA1	6.06701	0.534351	1.34582	-1.07803	0.788402	21.4839	0 .	1 x 38	17 q21	BRCA1 DNA repair associated
TC01001212.hg	621	TC01001212.hg	TUFT1	6.8561	0.56903	1.34474	-1.45186	0.702674	16.5548	0 .	2 x 44	1 q21	tuftelin 1
TC02003441.hg	622	TC02003441.hg	CNOT11	7.9708	0.571575	1.34451	-1.66221	0.8198	23.9978	0 .	1 x 40	2 q11	CCR4-NOT transcription complex subunit 11
TC13000273.hg	623	TC13000273.hg	KLF5	9.62051	1.00138	1.33881	-3.73214	0.829793	24.9249	0 .	1 x 44	13 q22	Kruppel like factor 5
TC01001927.hg	624	TC01001927.hg	MAP3K21	6.59903	0.534161	1.32613	-1.63978	0.757854	19.4719	0 .	3 x 41	1 q42	mitogen-activated protein kinase kinase kinase 21
TC01001473.hg	625	TC01001473.hg	ATP1B1	9.0294	0.657988	1.32143	-2.34303	0.613924	13.0374	0 .	1 x 45	1 q24	ATPase Na+/K+ transporting subunit beta 1
TC0X000779.hg	626	TC0X000779.hg	DKC1	8.32866	0.502748	1.30985	-1.67849	0.819244	23.9483	0 .	3 x 41	X q28	dyskerin pseudouridine synthase 1
TC12000028.hg	627	TC12000028.hg	FKBP4	8.7304	0.557386	1.30969	-1.52299	0.714412	17.1149	0 .	3 x 39	12 p13	FKBP prolyl isomerase 4
TC09002918.hg	628	TC09002918.hg	STRBP	6.52245	0.534208	1.30966	-1.38066	0.841119	26.0696	0 .	3 x 41	9 q33	spermatid perinuclear RNA binding protein
TC16000228.hg	629	TC16000228.hg	ANKS4B	7.25332	0.714101	1.30767	-2.53912	0.716847	17.2347	0 .	1 x 43	16 p12	ankyrin repeat and sterile alpha motif domain containing 4B
TC09001051.hg	630	TC09001051.hg	STOML2	8.6142	0.472235	1.30671	-1.37964	0.768428	20.1289	0 .	2 x 38	9 p13	stomatin like 2
TC16000493.hg	631	TC16000493.hg	ADGRG1	8.63173	0.635128	1.30308	-1.83228	0.642322	14.0485	0 .	2 x 45	16 q21	adhesion G protein-coupled receptor G1
TC12001426.hg	632	TC12001426.hg	SLC38A1	9.33591	0.701476	1.29707	-3.51537	0.835923	25.531	0 .	1 x 43	12 q13	solute carrier family 38 member 1
TC06000427.hg	633	TC06000427.hg	ITPR3	8.44254	0.658133	1.29527	-2.20306	0.725774	17.6851	0 .	1 x 42	6 p21	inositol 1,4,5-trisphosphate receptor type 3
TC10001688.hg	634	TC10001688.hg	PDZD8	9.24558	0.61007	1.29386	-1.58351	0.739946	18.4397	0 .	2 x 40	10 q26	PDZ domain containing 8
TC08000415.hg	635	TC08000415.hg		8.81542	0.727313	1.28744	-2.95013	0.63887	13.9207	0 .	1 x 44	8 q12	keratin 8 pseudogene 3
TC06000225.hg	636	TC06000225.hg	H2AC12	6.05554	0.500213	1.28561	-1.31592	0.754593	19.2768	0 .	1 x 39	6 p22	H2A clustered histone 12
TC0X000619.hg	637	TC0X000619.hg	UTP14A	7.62481	0.522318	1.2824	-1.33668	0.764819	19.9003	0 .	3 x 40	X q26	UTP14A small subunit processome component
TC11000249.hg	638	TC11000249.hg	ZDHHC13	7.04557	0.601404	1.27793	-2.3729	0.802721	22.5639	0 .	2 x 41	11 p15	zinc finger DHHC-type containing 13
TC21000471.hg	639	TC21000471.hg	TMPRSS2	8.14593	0.605075	1.2725	-2.25945	0.715649	17.1756	0 .	1 x 43	21 q22	transmembrane serine protease 2
TC19002494.hg	640	TC19002494.hg		11.1058	1.19915	1.2714	-5.4523	0.751256	19.0805	0 .	1 x 44	19 q13	CEA cell adhesion molecule pseudogene 1
TC07000110.hg	641	TC07000110.hg	BZW2	7.70924	0.596989	1.27083	-1.84654	0.866168	29.0537	0 .	1 x 40	7 p21	basic leucine zipper and W2 domains 2
TC01003189.hg	642	TC01003189.hg	H3C14	7.69771	0.553727	1.26267	-1.5389	0.723724	17.5801	0 .	1 x 39	1 q21	H3 clustered histone 14
TC15000324.hg	643	TC15000324.hg	TMEM62	7.69152	0.561823	1.25862	-1.97408	0.728938	17.8492	0 .	3 x 40	15 q15	transmembrane protein 62
TC05001829.hg	644	TC05001829.hg	CDC25C	5.66022	0.437338	1.24511	-1.15087	0.775723	20.6053	0 .	2 x 38	5 q31	cell division cycle 25C
TC06001424.hg	645	TC06001424.hg	H4C11	10.2946	0.591738	1.24259	-2.55228	0.712428	17.0183	0 .	1 x 39	6 p22	H4 clustered histone 11
TC17001109.hg	646	TC17001109.hg	AURKB	7.25477	0.418885	1.24207	-1.006	0.705324	16.6789	0 .	2 x 38	17 p13	aurora kinase B
TC11002362.hg	647	TC11002362.hg	H2AX	7.48613	0.441042	1.23916	-1.28189	0.690037	15.9817	0 .	2 x 38	11 q23	H2A.X variant histone
TC10001362.hg	648	TC10001362.hg	PPA1	9.13307	0.595347	1.23216	-2.13082	0.814367	23.5224	0 .	2 x 42	10 q22	inorganic pyrophosphatase 1
TC04001464.hg	649	TC04001464.hg	CASP6	7.58118	0.474402	1.22993	-1.36093	0.794199	21.9091	0 .	3 x 40	4 q25	caspase 6
TC10001309.hg	650	TC10001309.hg	ZWINT	6.66151	0.47202	1.22681	-1.21134	0.788934	21.5222	0 .	1 x 38	10 q21	ZW10 interacting kinetochore protein
TC05000896.hg	651	TC05000896.hg	PTTG1	5.03777	0.43655	1.22217	-0.977039	0.689568	15.961	0 .	2 x 38	5 q33	PTTG1 regulator of sister chromatid separation, securin
TC20000407.hg	652	TC20000407.hg	PARD6B	6.85835	0.632543	1.22054	-2.22813	0.763393	19.8113	0 .	2 x 44	20 q13	par-6 family cell polarity regulator beta
TC19000981.hg	653	TC19000981.hg	PLPP2	9.12089	0.613026	1.21103	-1.95708	0.74749	18.863	0 .	1 x 44	19 p13	phospholipid phosphatase 2
TC06004063.hg	654	TC06004063.hg	H2AC13	6.05754	0.484993	1.20397	-1.28165	0.67814	15.4677	0 .	2 x 38	6 p22	H2A clustered histone 13
TC05000303.hg	655	TC05000303.hg	MARVELD2	7.47933	0.66253	1.19432	-2.79593	0.767982	20.1004	0 .	1 x 44	CHR_HSCHR5_2_CTG1_1 q13	MARVEL domain containing 2
TC01001175.hg	656	TC01001175.hg	H3C14	7.83313	0.55283	1.19336	-1.61336	0.711277	16.9626	0 .	1 x 39	1 q21	H3 clustered histone 14
TC12001605.hg	657	TC12001605.hg	TIMELESS	6.75774	0.410977	1.18779	-0.889159	0.743776	18.6526	0 .	2 x 38	12 q13	timeless circadian regulator
TC07001654.hg	658	TC07001654.hg	MCM7	7.99296	0.523339	1.1847	-1.45349	0.857975	27.9979	0 .	2 x 40	7 q22	minichromosome maintenance complex component 7
TC02000293.hg	659	TC02000293.hg	EPCAM	9.79261	1.22032	1.18452	-5.88613	0.848912	26.9243	0 .	1 x 44	2 p21	epithelial cell adhesion molecule
TC05001392.hg	660	TC05001392.hg	DEPDC1B	5.76693	0.471647	1.18036	-1.30961	0.786489	21.3469	0 .	2 x 39	5 q12	DEP domain containing 1B
TC10001551.hg	661	TC10001551.hg	ALDH18A1	8.52395	0.559341	1.17588	-1.57167	0.783306	21.1227	0 .	2 x 41	10 q24	aldehyde dehydrogenase 18 family member A1
TC02000530.hg	662	TC02000530.hg	ANAPC1	7.81987	0.50888	1.17537	-1.57855	0.865419	28.9534	0 .	1 x 39	2 p11	anaphase promoting complex subunit 1 (ANAPC1) pseudogene
TC01001280.hg	663	TC01001280.hg	CKS1B	6.75209	0.463859	1.17112	-1.12495	0.772142	20.3689	0 .	3 x 39	1 q21	CDC28 protein kinase regulatory subunit 1B
TC02003807.hg	664	TC02003807.hg	ATIC	8.8506	0.564611	1.16196	-1.86936	0.859213	28.1519	0 .	1 x 40	2 q35	5-aminoimidazole-4-carboxamide ribonucleotide formyltransferase/IMP cyclohydrolase
TC19001171.hg	665	TC19001171.hg	AP1M2	7.55209	0.639801	1.15378	-2.20593	0.817081	23.7575	0 .	1 x 43	19 p13	adaptor related protein complex 1 subunit mu 2
TC09001488.hg	666	TC09001488.hg	PTBP3	9.58619	0.500935	1.14906	-2.31125	0.800134	22.3611	0 .	3 x 41	9 q32	polypyrimidine tract binding protein 3
TC12000424.hg	667	TC12000424.hg	KRT18	10.5703	0.74633	1.13636	-3.68401	0.700014	16.4317	0 .	1 x 44	12 q13	keratin 18
TC6_qbl_hap6000048.hg	668	TC6_qbl_hap6000048.hg	TCF19	6.14716	0.405133	1.13556	-0.9648	0.660965	14.7649	0 .	2 x 38	CHR_HSCHR6_MHC_DBB_CTG1 p21	transcription factor 19
TC6_ssto_hap7000042.hg	669	TC6_ssto_hap7000042.hg	TCF19	6.14716	0.405133	1.13556	-0.9648	0.660965	14.7649	0 .	2 x 38	CHR_HSCHR6_MHC_DBB_CTG1 p21	transcription factor 19
TC01002963.hg	670	TC01002963.hg	EPS8L3	7.49133	0.538344	1.13236	-1.72361	0.747473	18.8621	0 .	2 x 43	1 p13	EPS8 like 3
TC09001996.hg	671	TC09001996.hg	TJP2	7.9392	0.609662	1.13026	-2.46725	0.753368	19.2043	0 .	2 x 42	9 q21	tight junction protein 2
TC6_mann_hap4000049.hg	672	TC6_mann_hap4000049.hg	TCF19	6.12809	0.40517	1.11581	-0.980165	0.660039	14.7282	0 .	2 x 38	CHR_HSCHR6_MHC_DBB_CTG1 p21	transcription factor 19
TC6_mcf_hap5000042.hg	673	TC6_mcf_hap5000042.hg	TCF19	6.12809	0.40517	1.11581	-0.980165	0.660039	14.7282	0 .	2 x 38	CHR_HSCHR6_MHC_DBB_CTG1 p21	transcription factor 19
TC06000358.hg	674	TC06000358.hg	TCF19	6.15776	0.397964	1.11426	-0.935273	0.66533	14.9393	0 .	2 x 38	CHR_HSCHR6_MHC_DBB_CTG1 p21	transcription factor 19
TC6_cox_hap2000055.hg	675	TC6_cox_hap2000055.hg	TCF19	6.14156	0.413396	1.11337	-0.989147	0.676058	15.3801	0 .	2 x 38	CHR_HSCHR6_MHC_DBB_CTG1 p21	transcription factor 19
TC6_dbb_hap3000048.hg	676	TC6_dbb_hap3000048.hg	TCF19	6.15481	0.409389	1.11038	-0.970529	0.670112	15.1337	0 .	2 x 38	CHR_HSCHR6_MHC_DBB_CTG1 p21	transcription factor 19
TC02002504.hg	677	TC02002504.hg	STK39	7.94938	0.606296	1.10479	-3.18302	0.766404	20.0002	0 .	1 x 43	2 q24	serine/threonine kinase 39
TC04000880.hg	678	TC04000880.hg		9.79623	1.2147	1.08623	-6.26997	0.838649	25.8106	0 .	1 x 44	4 q34	epithelial cell adhesion molecule (EPCAM) pseudo
TC06002144.hg	679	TC06002144.hg	MAP7	8.14701	0.623606	1.08299	-2.19894	0.862663	28.5913	0 .	1 x 43	6 q23	microtubule associated protein 7
TC12001361.hg	680	TC12001361.hg	SINHCAF	8.21043	0.586915	1.06954	-2.45421	0.847409	26.7547	0 .	2 x 42	12 p11	SIN3-HDAC complex associated factor
TC12001539.hg	681	TC12001539.hg	KRT8	10.6846	0.76508	1.06487	-3.4097	0.728978	17.8513	0 .	1 x 44	12 q13	keratin 8
TC01000427.hg	682	TC01000427.hg	HDAC1	8.31864	0.439148	1.06339	-1.24872	0.835657	25.5041	0 .	3 x 40	1 p35	histone deacetylase 1
TC06001421.hg	683	TC06001421.hg	H2BC13	4.96124	0.464013	1.04475	-1.4348	0.684369	15.7338	0 .	2 x 38	6 p22	H2B clustered histone 13
TC01003887.hg	684	TC01003887.hg	LBR	8.38414	0.47832	1.03	-1.13276	0.783844	21.1602	0 .	3 x 39	1 q42	lamin B receptor
TC12000949.hg	685	TC12000949.hg	MLEC	9.52102	0.564663	1.01475	-1.78576	0.799946	22.3466	0 .	2 x 40	12 q24	malectin
TC02000615.hg	686	TC02000615.hg	CNOT11	8.05793	0.446928	0.942753	-1.21032	0.854579	27.5848	0 .	3 x 40	2 q11	CCR4-NOT transcription complex subunit 11
TC02001260.hg	687	TC02001260.hg	ATIC	7.7997	0.45385	0.901787	-1.46081	0.855264	27.667	0 .	3 x 40	2 q35	5-aminoimidazole-4-carboxamide ribonucleotide formyltransferase/IMP cyclohydrolase

## Sheet: SpotD
	Rank	ID	Symbol	mean expression	SD	max delta e	min delta e	correlation	->t.score	->p.value	Metagene	Chromosome	Description
TC0X001155.hg	1	TC0X001155.hg		5.33525	2.83376	5.97996	-2.319	0.150485	2.55164	0.00562568042067957 .	10 x 45	X q13	X inactive specific transcript
TC0X002125.hg	2	TC0X002125.hg		5.1256	2.71164	5.91379	-2.16098	0.145978	2.47354	0.00698477742181791 .	10 x 45	X q13	X inactive specific transcript
TC10001929.hg	3	TC10001929.hg	MALRD1	3.86429	1.66208	5.43034	-1.66186	0.312999	5.5244	3.76838773519239e-08 .	7 x 45	10 p12	MAM and LDL receptor class A domain containing 1
TC0X001997.hg	4	TC0X001997.hg		5.60379	1.45907	5.33559	-1.75745	0.451435	8.48077	6.66133814775094e-16 .	8 x 45	X p22	novel transcript, antisense to MAGEB17
TC04002054.hg	5	TC04002054.hg		4.75231	1.13706	5.27215	-2.00317	0.256509	4.44872	6.23019867962427e-06 .	5 x 44	CHR_HSCHR4_1_CTG9 q13	pseudogene similar to part of UDP glucuronosyltransferase 2 family protein
TC04002053.hg	6	TC04002053.hg		4.40078	0.770238	4.88085	-1.2186	0.283126	4.94854	6.45107556263014e-07 .	7 x 43	CHR_HSCHR4_1_CTG9 q13	pseudogene similar to part of UDP glucuronosyltransferase 2 family protein
TC01005754.hg	7	TC01005754.hg		4.94779	1.45532	4.79552	-2.23548	0.322361	5.70849	1.44685297076563e-08 .	17 x 45
TC04002546.hg	8	TC04002546.hg		3.96518	1.01238	4.67156	-1.17365	0.413738	7.61812	1.9773072068574e-13 .	16 x 43
TC10001930.hg	9	TC10001930.hg	MALRD1	3.92009	1.06912	4.54651	-1.14913	0.337154	6.00323	2.978922442054e-09 .	8 x 45	10 p12	MAM and LDL receptor class A domain containing 1
TC07001726.hg	10	TC07001726.hg		5.49402	1.19473	4.49764	-1.5562	0.245251	4.24066	1.51381616190216e-05 .	4 x 44	7 q22	LHFPL3 antisense RNA 2
TC07002955.hg	11	TC07002955.hg		8.553	0.783557	4.37782	-2.56672	0.334483	5.94964	3.98762933784269e-09 .	6 x 45
TC12001034.hg	12	TC12001034.hg	PIWIL1	4.66541	0.85885	4.25829	-0.969882	0.263681	4.58227	3.46238076343042e-06 .	7 x 43	CHR_HSCHR12_5_CTG2_1 q24	piwi like RNA-mediated gene silencing 1
TC09000767.hg	13	TC09000767.hg	CEL	7.9135	1.3964	4.15962	-1.80663	0.206492	3.53768	0.000236048566565561 .	3 x 45	9 q34	carboxyl ester lipase
TC08001294.hg	14	TC08001294.hg	CPA6	5.52232	1.20642	4.1545	-1.61092	0.196665	3.36237	0.000440003118521326 .	5 x 45	8 q13	carboxypeptidase A6
TC09002315.hg	15	TC09002315.hg	CEL	7.37391	1.38395	4.1459	-2.40758	0.192934	3.29609	0.000553162856471223 .	3 x 45	9 q34	carboxyl ester lipase
TC06003217.hg	16	TC06003217.hg		4.25454	1.1848	4.13206	-1.62163	0.474008	9.024	0 .	10 x 45
TC22000440.hg	17	TC22000440.hg	DUXAP9	5.36561	1.20619	4.07746	-1.90665	0.510424	9.95004	0 .	10 x 45	22 q11	novel pseudogene
TC17000610.hg	18	TC17000610.hg		6.16523	0.611543	3.99498	-1.76121	0.6855	15.7829	0 .	13 x 44	17 q12
TC05001247.hg	19	TC05001247.hg		3.95982	0.899857	3.97838	-1.6611	0.825989	24.5635	0 .	15 x 45	5 p13	TEC
TC13001566.hg	20	TC13001566.hg		5.39206	1.43128	3.94625	-2.82979	0.739202	18.3988	0 .	9 x 45
TC04002536.hg	21	TC04002536.hg	GABRA2	4.88917	1.25288	3.93602	-1.56029	0.172383	2.93358	0.00181349456248914 .	3 x 45	4 p12	gamma-aminobutyric acid type A receptor alpha2 subunit
TC01004427.hg	22	TC01004427.hg		4.36296	0.855394	3.92414	-1.58261	0.618186	13.1836	0 .	11 x 45
TC10001928.hg	23	TC10001928.hg	MALRD1	5.38619	0.98311	3.87046	-1.01368	0.301237	5.29565	1.1979994496425e-07 .	8 x 45	10 p12	MAM and LDL receptor class A domain containing 1
TC09002316.hg	24	TC09002316.hg	CEL	7.58908	1.17794	3.82234	-1.81989	0.203346	3.48143	0.000289043725543392 .	4 x 45	9 q34	carboxyl ester lipase
TC05001248.hg	25	TC05001248.hg		4.09201	0.79404	3.75241	-1.77246	0.811576	23.2855	0 .	14 x 45	5 p13	TEC
TC04002049.hg	26	TC04002049.hg		2.89803	0.827321	3.72981	-1.14972	0.644185	14.1181	0 .	9 x 45	4 q13	novel transcript
TC13001565.hg	27	TC13001565.hg		4.02031	1.02143	3.72631	-1.79505	0.706055	16.7133	0 .	9 x 45
TC13000980.hg	28	TC13000980.hg		4.44762	0.760588	3.68028	-1.51979	0.800883	22.4195	0 .	10 x 45
TC10000143.hg	29	TC10000143.hg	MALRD1	4.28737	0.797689	3.64574	-0.743819	0.329562	5.85135	6.7748014975777e-09 .	8 x 45	10 p12	MAM and LDL receptor class A domain containing 1
TC01004428.hg	30	TC01004428.hg	FGGY	3.95665	0.801059	3.61136	-1.15996	0.514505	10.0581	0 .	9 x 45	1 p32	FGGY carbohydrate kinase domain containing
TC01000699.hg	31	TC01000699.hg	FGGY	3.24903	0.783604	3.5208	-1.16939	0.488318	9.3801	0 .	9 x 45	1 p32	FGGY carbohydrate kinase domain containing
TC02004035.hg	32	TC02004035.hg	MBOAT2	6.14109	1.01556	3.50157	-2.61401	0.298658	5.24584	1.53351928933176e-07 .	3 x 45	2 p25	membrane bound O-acyltransferase domain containing 2
TC04000359.hg	33	TC04000359.hg		2.70074	0.698973	3.4461	-1.16561	0.694089	16.1623	0 .	9 x 45	4 q13	novel transcript
TC02004355.hg	34	TC02004355.hg		4.6311	1.44837	3.44606	-2.1247	0.371799	6.71377	5.23543430830387e-11 .	4 x 45
TC16001546.hg	35	TC16001546.hg	NKD1	6.69872	1.43082	3.43568	-2.57405	0.373168	6.7425	4.41711112131316e-11 .	4 x 45	16 q12	NKD inhibitor of WNT signaling pathway 1
TC09000737.hg	36	TC09000737.hg		7.52503	0.908829	3.42511	-2.22679	0.469537	8.91467	0 .	12 x 43
TC09000920.hg	37	TC09000920.hg	FREM1	5.61974	1.08513	3.41336	-1.55578	0.329601	5.85213	6.7465919517673e-09 .	6 x 45	9 p22	FRAS1 related extracellular matrix 1
TC04001016.hg	38	TC04001016.hg		2.66525	0.749154	3.40736	-1.08906	0.628088	13.5305	0 .	11 x 45	4 p16	microRNA 95
TC09000768.hg	39	TC09000768.hg	CEL	7.15423	1.06226	3.39219	-1.65089	0.190186	3.24738	0.00065299319907397 .	4 x 45	9 q34	carboxyl ester lipase
TC19001925.hg	40	TC19001925.hg		5.20882	0.819322	3.38576	-1.29397	0.554774	11.1775	0 .	11 x 45
TC01004094.hg	41	TC01004094.hg	LYPD8	6.33985	0.804817	3.38036	-1.1413	0.204305	3.49858	0.000271811544811928 .	5 x 45	1 q44	LY6/PLAUR domain containing 8
TC01003816.hg	42	TC01003816.hg		4.13834	0.805909	3.37657	-1.24822	0.442586	8.27354	2.66453525910038e-15 .	8 x 45	1 q32	PROX1 antisense RNA 1
TC12002128.hg	43	TC12002128.hg		6.69965	0.946359	3.35346	-1.78105	0.340544	6.07146	2.04923367164156e-09 .	3 x 45	12 q24	long intergenic non-protein coding RNA 2418
TC03000170.hg	44	TC03000170.hg		5.93847	1.2288	3.35071	-2.47265	0.634797	13.7717	0 .	4 x 45	3 p22	novel transcript
TC05002179.hg	45	TC05002179.hg		7.56433	1.28381	3.33139	-2.93143	0.659983	14.726	0 .	12 x 45
TC21000725.hg	46	TC21000725.hg		6.29067	1.0102	3.29435	-1.40973	0.395478	7.21785	2.47246667584022e-12 .	7 x 45
TC05002180.hg	47	TC05002180.hg		8.06382	1.33019	3.29421	-3.18113	0.654833	14.5242	0 .	12 x 45
TC12000220.hg	48	TC12000220.hg		4.26163	0.855715	3.28862	-1.66885	0.764956	19.909	0 .	13 x 45	12 p12	novel transcript
TC14000857.hg	49	TC14000857.hg		6.07893	0.873321	3.28139	-1.66712	0.433918	8.07344	1.01030295240889e-14 .	9 x 45
TC02002644.hg	50	TC02002644.hg	PGAP1	5.9304	0.893285	3.22721	-1.89088	0.462006	8.73248	1.11022302462516e-16 .	4 x 45	2 q33	post-GPI attachment to proteins inositol deacylase 1
TC14001573.hg	51	TC14001573.hg		6.27194	0.905826	3.22313	-1.80143	0.410023	7.53582	3.34732241924485e-13 .	9 x 45
TC14001907.hg	52	TC14001907.hg		6.11979	0.87576	3.21983	-1.77386	0.418343	7.72079	1.02029495963052e-13 .	9 x 45
TC09001215.hg	53	TC09001215.hg	TRPM6	5.18381	0.78051	3.21128	-1.12212	0.324817	5.75709	1.11942322078562e-08 .	5 x 45	9 q21	transient receptor potential cation channel subfamily M member 6
TC12003170.hg	54	TC12003170.hg		6.70879	0.929523	3.20201	-1.7552	0.339659	6.05361	2.26052909724217e-09 .	3 x 45	12 q24	long intergenic non-protein coding RNA 2418
TC06002415.hg	55	TC06002415.hg		5.15967	0.704236	3.16983	-1.6125	0.782659	21.0776	0 .	12 x 45
TC01005531.hg	56	TC01005531.hg		6.04597	0.763032	3.15634	-1.48546	0.538333	10.7081	0 .	7 x 45	1 p32	long intergenic non-protein coding RNA 1748
TC14001269.hg	57	TC14001269.hg		4.06717	0.699384	3.14194	-1.34984	0.642515	14.0557	0 .	14 x 44	14 q24	ADAM metallopeptidase domain 20 pseudogene 1
TC0X001158.hg	58	TC0X001158.hg	MIR421	5.83101	0.944123	3.12776	-2.15452	0.772315	20.3802	0 .	15 x 45	X q13	FTX transcript, XIST regulator
TC08002370.hg	59	TC08002370.hg		3.74983	0.849555	3.12565	-1.59684	0.724541	17.6218	0 .	13 x 45
TC01002719.hg	60	TC01002719.hg		6.07355	0.817492	3.12109	-1.62532	0.519923	10.203	0 .	7 x 45	1 p32	long intergenic non-protein coding RNA 1748
TC16000701.hg	61	TC16000701.hg	DPEP1	9.08657	1.11391	3.11836	-2.13359	0.22979	3.9579	4.79204643836217e-05 .	3 x 45	16 q24	dipeptidase 1
TC06001155.hg	62	TC06001155.hg		5.20823	0.941707	3.11702	-1.61886	0.0394952	0.662577	0.254072414291466 .	3 x 45	6 q25	novel transcript
TC03002458.hg	63	TC03002458.hg	C3orf85	5.47407	1.00961	3.09124	-2.13607	0.279702	4.88358	8.75420167245622e-07 .	5 x 45	3 q13	chromosome 3 open reading frame 85
TC07003107.hg	64	TC07003107.hg		5.60933	0.958659	3.09048	-2.36301	0.595159	12.4149	0 .	16 x 45
TC22001186.hg	65	TC22001186.hg		6.04895	0.848342	3.08775	-1.64006	0.395347	7.21502	2.51609844070799e-12 .	9 x 45	22 q11	double homeobox A pseudogene 8
TC22000438.hg	66	TC22000438.hg	DUXAP9	7.07267	0.833895	3.08417	-1.69407	0.402297	7.3661	9.79993863836626e-13 .	8 x 45	22 q11	double homeobox A pseudogene 8
TC14002068.hg	67	TC14002068.hg		3.87878	0.67638	3.07408	-1.2533	0.628021	13.5281	0 .	15 x 43	14 q24	ADAM metallopeptidase domain 20 pseudogene 1
TC13000660.hg	68	TC13000660.hg	CAB39L	6.31274	0.97205	3.07369	-1.50883	0.425554	7.88299	3.5527136788005e-14 .	6 x 45	13 q14	calcium binding protein 39 like
TC03001516.hg	69	TC03001516.hg	CADPS	5.91021	0.864675	3.05407	-1.38137	0.249531	4.31955	1.0854340250277e-05 .	4 x 45	3 p14	calcium dependent secretion activator
TC01001066.hg	70	TC01001066.hg		3.56087	0.857364	3.04913	-1.59841	0.63352	13.7254	0 .	13 x 45	21 p11	novel transcript
TC10000082.hg	71	TC10000082.hg		4.99569	0.84794	3.04036	-1.97864	0.66827	15.0584	0 .	12 x 45
TC13001383.hg	72	TC13001383.hg		5.79685	0.726656	3.0189	-1.73446	0.232436	4.00606	3.95575096368006e-05 .	4 x 45
TC03000552.hg	73	TC03000552.hg	C3orf85	4.53054	0.959529	3.01227	-1.709	0.275658	4.80712	1.24895698094818e-06 .	5 x 45	3 q13	chromosome 3 open reading frame 85
TC05003422.hg	74	TC05003422.hg	AMACR	7.08715	0.818837	3.00975	-1.86294	0.404616	7.41684	7.1187500338965e-13 .	4 x 45	5 p13	alpha-methylacyl-CoA racemase
TC14000026.hg	75	TC14000026.hg		6.08673	0.786714	3.00068	-1.5482	0.437703	8.16047	5.6621374255883e-15 .	9 x 45
TC0X001491.hg	76	TC0X001491.hg		6.65642	0.788945	2.99731	-1.76462	0.652276	14.4253	0 .	11 x 45
TC19002388.hg	77	TC19002388.hg		4.02324	0.745307	2.95976	-1.31927	0.423823	7.8439	4.57411886145564e-14 .	7 x 45	19 p12	TEC
TC11003006.hg	78	TC11003006.hg		5.36354	0.821031	2.95619	-1.6913	0.585963	12.1215	0 .	12 x 45	11 p15	KCNQ1 opposite strand/antisense transcript 1
TC0X000908.hg	79	TC0X000908.hg		3.59905	0.648595	2.9375	-1.11316	0.463507	8.76859	1.11022302462516e-16 .	9 x 43	X p22	microRNA 23c
TC08001231.hg	80	TC08001231.hg	PLAG1	5.09727	0.736837	2.92311	-1.24239	0.430326	7.99135	1.73194791841524e-14 .	8 x 45	8 q12	PLAG1 zinc finger
TC01004682.hg	81	TC01004682.hg		3.9819	0.846192	2.89196	-1.59367	0.664125	14.8909	0 .	13 x 45	21 p11	novel transcript
TC02000997.hg	82	TC02000997.hg		3.28364	0.819438	2.8882	-1.26075	0.806984	22.9058	0 .	12 x 45	2 q24	microRNA 4774
TC09000278.hg	83	TC09000278.hg		4.40007	0.972354	2.88496	-1.81797	0.335491	5.96984	3.57327589739498e-09 .	10 x 43
TC08002489.hg	84	TC08002489.hg		4.61397	0.915455	2.87791	-2.0474	0.792113	21.7542	0 .	11 x 45
TC03000169.hg	85	TC03000169.hg	LINC01811	4.91095	0.817197	2.87493	-1.45158	0.584487	12.0751	0 .	8 x 45	3 p22	long intergenic non-protein coding RNA 1811
TC10000593.hg	86	TC10000593.hg	CDHR1	6.82915	1.13682	2.87401	-1.84518	0.258539	4.48643	5.28515188324974e-06 .	3 x 44	10 q23	cadherin related family member 1
TC06002124.hg	87	TC06002124.hg	SLC2A12	6.66935	1.22163	2.86987	-2.75411	0.380404	6.89511	1.77584613680892e-11 .	3 x 45	6 q23	solute carrier family 2 member 12
TC03003403.hg	88	TC03003403.hg	TDGF1	6.53687	0.875264	2.86547	-1.51061	0.303673	5.3428	9.46719311833988e-08 .	4 x 45	3 p21	teratocarcinoma-derived growth factor 1
TC07002842.hg	89	TC07002842.hg		5.56849	0.612379	2.85715	-1.29362	0.5708	11.6532	0 .	8 x 45	7 p15	novel transcript
TC10001090.hg	90	TC10001090.hg		5.26303	0.68157	2.84585	-1.38196	0.753183	19.1934	0 .	12 x 45	10 p12	chromosome 10 open reading frame 113
TC12000221.hg	91	TC12000221.hg		5.24766	0.69937	2.8427	-1.52373	0.721142	17.4491	0 .	13 x 45
TC02002654.hg	92	TC02002654.hg		4.81966	0.855777	2.83739	-1.76727	0.787346	21.4081	0 .	15 x 45
TC10002530.hg	93	TC10002530.hg		5.69219	0.667251	2.83527	-1.38742	0.640296	13.9733	0 .	13 x 45
TC13000738.hg	94	TC13000738.hg	TBC1D4	7.48227	0.77786	2.8349	-2.10547	0.493468	9.51065	0 .	6 x 45	13 q22	TBC1 domain family member 4
TC08002335.hg	95	TC08002335.hg	PLAG1	5.35556	0.872573	2.82177	-1.70352	0.40477	7.42021	6.96998014859673e-13 .	8 x 45	8 q12	PLAG1 zinc finger
TC22000381.hg	96	TC22000381.hg	FAM118A	7.61466	1.20594	2.8199	-3.38225	0.413321	7.60887	2.09832151654155e-13 .	15 x 45	22 q13	family with sequence similarity 118 member A
TC03002279.hg	97	TC03002279.hg		4.74666	0.765483	2.81614	-1.28178	0.59918	12.5455	0 .	8 x 45
TC01002487.hg	98	TC01002487.hg		3.1552	0.675737	2.80344	-1.04589	0.626528	13.4752	0 .	9 x 45	1 p34	microRNA 552
TC22001187.hg	99	TC22001187.hg		5.03485	0.656988	2.80315	-1.28227	0.481388	9.20646	0 .	9 x 45
TC05000084.hg	100	TC05000084.hg	OTULINL	7.16994	0.817011	2.80214	-2.80405	0.403018	7.38186	8.8751228588535e-13 .	6 x 45	5 p15	OTU deubiquitinase with linear linkage specificity like
TC07002845.hg	101	TC07002845.hg		5.42369	0.878125	2.80083	-1.87812	0.751143	19.0739	0 .	16 x 45
TC07001536.hg	102	TC07001536.hg	CCL24	7.45925	1.11992	2.79816	-2.03608	0.234183	4.0379	3.48101520606381e-05 .	3 x 45	7 q11	C-C motif chemokine ligand 24
TC07001452.hg	103	TC07001452.hg	ZNF117	6.90952	0.600386	2.78834	-1.57809	0.628033	13.5286	0 .	10 x 45	7 q11	zinc finger protein 117
TC13000511.hg	104	TC13000511.hg	LNX2	8.44963	0.729621	2.77724	-1.83266	0.410135	7.5383	3.29514193708746e-13 .	3 x 45	13 q12	ligand of numb-protein X 2
TC06003282.hg	105	TC06003282.hg		3.69977	0.608835	2.77565	-1.04853	0.587349	12.1653	0 .	10 x 45
TC08000754.hg	106	TC08000754.hg		5.04076	1.1709	2.7744	-2.77871	0.685049	15.7633	0 .	13 x 45	8 q24	Pvt1 oncogene
TC12000203.hg	107	TC12000203.hg	PTPRO	6.10104	0.782916	2.76614	-1.39092	0.29513	5.17793	2.14126500530654e-07 .	5 x 45	12 p12	protein tyrosine phosphatase receptor type O
TC17001593.hg	108	TC17001593.hg		5.25032	0.856094	2.7653	-2.56151	0.706792	16.7482	0 .	16 x 45	17 q21	novel transcript, antisense to HEXIM1 and HEXIM2
TC05003448.hg	109	TC05003448.hg	C1QTNF3	6.64383	0.536785	2.76377	-1.12667	0.556331	11.2229	0 .	8 x 45	5 p13	C1QTNF3-AMACR readthrough (NMD candidate)
TC09002250.hg	110	TC09002250.hg		5.19951	0.628305	2.75988	-1.24265	0.591456	12.2958	0 .	10 x 45	9 q33	MIR181A2 host gene
TC0X002129.hg	111	TC0X002129.hg		7.19444	0.856407	2.74378	-1.95422	0.75987	19.5943	0 .	15 x 45
TC16000279.hg	112	TC16000279.hg		5.86742	1.1125	2.7378	-4.04449	0.49482	9.54514	0 .	11 x 45
TC13001229.hg	113	TC13001229.hg		5.77413	0.687889	2.72452	-1.64994	0.750301	19.0249	0 .	10 x 45	13 q31	miR-17-92a-1 cluster host gene
TC11001282.hg	114	TC11001282.hg		5.0211	0.755288	2.72377	-2.03645	0.567341	11.5489	0 .	12 x 45	11 p15	KCNQ1 opposite strand/antisense transcript 1
TC16000276.hg	115	TC16000276.hg		8.5525	0.575756	2.71977	-1.66274	0.509758	9.9325	0 .	8 x 43
TC13000722.hg	116	TC13000722.hg	DACH1	7.68501	1.29763	2.7155	-3.30519	0.478826	9.14284	0 .	3 x 45	13 q21	dachshund family transcription factor 1
TC13000652.hg	117	TC13000652.hg	SUCLA2	7.29727	0.607569	2.69563	-1.17403	0.422471	7.81342	5.59552404411079e-14 .	5 x 45	13 q14	succinate-CoA ligase ADP-forming beta subunit
TC04001060.hg	118	TC04001060.hg		3.80734	0.760645	2.69496	-1.32094	0.564778	11.4723	0 .	10 x 45
TC06003153.hg	119	TC06003153.hg		4.38937	0.571903	2.69459	-1.02728	0.812987	23.4047	0 .	12 x 45
TC06002981.hg	120	TC06002981.hg		5.03133	0.662646	2.6906	-1.39718	0.533981	10.5869	0 .	8 x 44	6 q21	coiled-coil domain containing 162, pseudogene
TC03000911.hg	121	TC03000911.hg		5.21729	1.00255	2.6862	-2.42527	0.742637	18.5889	0 .	11 x 45	3 q26	RNA, U4 small nuclear 38, pseudogene
TC20001184.hg	122	TC20001184.hg	HM13	7.65456	0.80431	2.68408	-2.08403	0.602622	12.6585	0 .	6 x 45	20 q11	histocompatibility minor 13
TC17002723.hg	123	TC17002723.hg		5.50483	0.794935	2.67554	-1.55026	0.705867	16.7044	0 .	12 x 45	17 q22	novel transcript
TC09000006.hg	124	TC09000006.hg		3.66734	0.609175	2.67507	-1.24841	0.556929	11.2404	0 .	8 x 45	9 p24	novel transcript
TC08002401.hg	125	TC08002401.hg		4.72301	0.554189	2.67392	-1.12308	0.527376	10.405	0 .	8 x 44
TC13000813.hg	126	TC13000813.hg	OXGR1	4.9873	0.915045	2.67058	-1.45965	0.253929	4.40087	7.66401756013835e-06 .	4 x 45	13 q32	oxoglutarate receptor 1
TC07002932.hg	127	TC07002932.hg		6.71991	0.569161	2.66553	-1.7302	0.638424	13.9043	0 .	7 x 45
TC12000219.hg	128	TC12000219.hg	PLEKHA5	7.2514	0.570451	2.66267	-1.48166	0.482468	9.23338	0 .	6 x 45	12 p12	pleckstrin homology domain containing A5
TC09002377.hg	129	TC09002377.hg		4.23066	0.538331	2.66192	-0.927998	0.68325	15.6855	0 .	10 x 44
TC13001075.hg	130	TC13001075.hg		6.24922	0.733311	2.65371	-1.35605	0.730579	17.9353	0 .	13 x 45
TC07001728.hg	131	TC07001728.hg		6.15638	0.743147	2.64726	-1.95468	0.871323	29.7651	0 .	13 x 45
TC11002689.hg	132	TC11002689.hg	STX3	6.15354	0.689638	2.64476	-1.48678	0.652622	14.4387	0 .	10 x 45	11 q12	syntaxin 3
TC10000815.hg	133	TC10000815.hg		4.76206	0.712474	2.64183	-1.39285	0.765464	19.9409	0 .	13 x 45	10 q25	microRNA 4295
TC06002899.hg	134	TC06002899.hg		4.25355	0.606367	2.62918	-1.21342	0.718397	17.3116	0 .	12 x 44	6 q14	novel transcript
TC09002677.hg	135	TC09002677.hg	PTCH1	8.45345	0.861459	2.61424	-2.93346	0.293289	5.14257	2.54431774315833e-07 .	3 x 45	9 q22	patched 1
TC19002417.hg	136	TC19002417.hg	ZNF681	4.37859	0.947907	2.613	-2.26462	0.471872	8.97166	0 .	6 x 45	19 p12	zinc finger protein 681
TC06003353.hg	137	TC06003353.hg		5.53004	0.672953	2.60996	-1.61164	0.641382	14.0136	0 .	14 x 45
TC13000214.hg	138	TC13000214.hg		4.29446	0.456743	2.60844	-1.115	0.588801	12.2113	0 .	8 x 45
TC20000599.hg	139	TC20000599.hg	GPCPD1	7.95766	0.762211	2.6082	-2.28319	0.552647	11.1158	0 .	11 x 44	20 p12	glycerophosphocholine phosphodiesterase 1
TC08001180.hg	140	TC08001180.hg		5.60664	0.772936	2.60629	-1.9476	0.5865	12.1385	0 .	13 x 44	8 p11	novel transcript
TC16000274.hg	141	TC16000274.hg		6.19659	1.01317	2.60251	-3.98185	0.520141	10.2088	0 .	10 x 45
TC0Y000085.hg	142	TC0Y000085.hg		5.26795	0.863007	2.59931	-3.43487	0.49372	9.51708	0 .	14 x 43	15 q25	dynamin 1 pseudogene 41
TC0Y000220.hg	143	TC0Y000220.hg		5.26795	0.863007	2.59931	-3.43487	0.49372	9.51708	0 .	14 x 43	15 q25	dynamin 1 pseudogene 41
TC06002414.hg	144	TC06002414.hg		5.3117	0.566821	2.59593	-1.22386	0.745017	18.7225	0 .	11 x 45
TC13001485.hg	145	TC13001485.hg	SUCLA2	4.73651	0.523133	2.59565	-1.02989	0.487762	9.3661	0 .	7 x 45	13 q14	succinate-CoA ligase ADP-forming beta subunit
TC19002062.hg	146	TC19002062.hg		5.82053	0.882232	2.59439	-1.54746	0.415714	7.66209	1.48991929904696e-13 .	8 x 45	19 p12	zinc finger protein 726 pseudogene 1
TC09002409.hg	147	TC09002409.hg	ZDHHC21	4.76983	0.743132	2.59369	-1.78808	0.776496	20.657	0 .	15 x 45	9 p22	zinc finger DHHC-type containing 21
TC07002985.hg	148	TC07002985.hg	ZNF117	8.24474	0.675125	2.59119	-2.06852	0.671819	15.2039	0 .	10 x 45	7 q11	zinc finger protein 117
TC02004258.hg	149	TC02004258.hg	BCL11A	5.67691	0.853854	2.58922	-2.16865	0.837238	25.6651	0 .	11 x 45	2 p16	BAF chromatin remodeling complex subunit BCL11A
TC06002412.hg	150	TC06002412.hg		6.26643	0.809939	2.58476	-2.13848	0.815574	23.6265	0 .	12 x 45
TC17002470.hg	151	TC17002470.hg		4.81078	0.552749	2.58195	-1.3946	0.591868	12.3091	0 .	9 x 45
TC04001141.hg	152	TC04001141.hg		4.57793	0.777822	2.58191	-2.07689	0.710209	16.9111	0 .	15 x 45
TC16000280.hg	153	TC16000280.hg		5.6454	0.873596	2.58149	-2.33104	0.526514	10.3815	0 .	11 x 43
TC15002393.hg	154	TC15002393.hg		5.64055	0.795853	2.5796	-1.46692	0.326038	5.78131	9.84489723077075e-09 .	6 x 45	15 q26	long intergenic non-protein coding RNA 2253
TC15001777.hg	155	TC15001777.hg		5.11763	0.874728	2.5673	-3.41052	0.485449	9.30795	0 .	14 x 43	15 q25	dynamin 1 pseudogene 41
TC07000126.hg	156	TC07000126.hg		4.58863	0.878673	2.56686	-1.78104	0.659377	14.7021	0 .	13 x 45	7 p21
TC03000110.hg	157	TC03000110.hg	KCNH8	5.42139	0.827297	2.56433	-1.5377	0.566203	11.5148	0 .	5 x 45	3 p24	potassium voltage-gated channel subfamily H member 8
TC01005770.hg	158	TC01005770.hg		6.74288	0.748563	2.56197	-1.92792	0.407055	7.47039	5.07371922253697e-13 .	9 x 44
TC06002716.hg	159	TC06002716.hg	LY6G6D	7.72543	1.16222	2.55905	-2.10845	0.279301	4.87599	9.07054986232225e-07 .	3 x 45	CHR_HSCHR6_MHC_SSTO_CTG1 p21	lymphocyte antigen 6 family member G6D
TC01001058.hg	160	TC01001058.hg		5.87869	1.07425	2.55407	-3.42659	0.593537	12.3626	0 .	16 x 45	19 p13	novel transcript
TC01001059.hg	161	TC01001059.hg		5.87869	1.07425	2.55407	-3.42659	0.593537	12.3626	0 .	16 x 45	19 p13	novel transcript
TC01001064.hg	162	TC01001064.hg		5.87869	1.07425	2.55407	-3.42659	0.593537	12.3626	0 .	16 x 45	19 p13	novel transcript
TC01003066.hg	163	TC01003066.hg		5.87869	1.07425	2.55407	-3.42659	0.593537	12.3626	0 .	16 x 45	19 p13	novel transcript
TC01003072.hg	164	TC01003072.hg		5.87869	1.07425	2.55407	-3.42659	0.593537	12.3626	0 .	16 x 45	19 p13	novel transcript
TC01003075.hg	165	TC01003075.hg		5.87869	1.07425	2.55407	-3.42659	0.593537	12.3626	0 .	16 x 45	19 p13	novel transcript
TC04000286.hg	166	TC04000286.hg		5.87869	1.07425	2.55407	-3.42659	0.593537	12.3626	0 .	16 x 45	19 p13	novel transcript
TC04001186.hg	167	TC04001186.hg		5.87869	1.07425	2.55407	-3.42659	0.593537	12.3626	0 .	16 x 45	19 p13	novel transcript
TC0Y000157.hg	168	TC0Y000157.hg		5.87869	1.07425	2.55407	-3.42659	0.593537	12.3626	0 .	16 x 45	19 p13	novel transcript
TC13000005.hg	169	TC13000005.hg		5.87869	1.07425	2.55407	-3.42659	0.593537	12.3626	0 .	16 x 45	19 p13	novel transcript
TC18000387.hg	170	TC18000387.hg		5.87869	1.07425	2.55407	-3.42659	0.593537	12.3626	0 .	16 x 45	19 p13	novel transcript
TC21000002.hg	171	TC21000002.hg		5.87869	1.07425	2.55407	-3.42659	0.593537	12.3626	0 .	16 x 45	19 p13	novel transcript
TC21000009.hg	172	TC21000009.hg		5.87869	1.07425	2.55407	-3.42659	0.593537	12.3626	0 .	16 x 45	19 p13	novel transcript
TC21000022.hg	173	TC21000022.hg		5.87869	1.07425	2.55407	-3.42659	0.593537	12.3626	0 .	16 x 45	19 p13	novel transcript
TC21000268.hg	174	TC21000268.hg		5.87869	1.07425	2.55407	-3.42659	0.593537	12.3626	0 .	16 x 45	19 p13	novel transcript
TCUn_gl000221000003.hg	175	TCUn_gl000221000003.hg		5.87869	1.07425	2.55407	-3.42659	0.593537	12.3626	0 .	16 x 45	19 p13	novel transcript
TCUn_gl000243000001.hg	176	TCUn_gl000243000001.hg		5.87869	1.07425	2.55407	-3.42659	0.593537	12.3626	0 .	16 x 45	19 p13	novel transcript
TCUn_gl000247000001.hg	177	TCUn_gl000247000001.hg		5.87869	1.07425	2.55407	-3.42659	0.593537	12.3626	0 .	16 x 45	19 p13	novel transcript
TC04001087.hg	178	TC04001087.hg		4.33886	0.837309	2.55361	-1.7839	0.753826	19.2314	0 .	14 x 45	4 p15	microRNA 573
TC14001146.hg	179	TC14001146.hg		5.73696	0.814461	2.55034	-1.56184	0.43189	8.02705	1.37667655053519e-14 .	5 x 45	14 q22	novel transcript
TC06002110.hg	180	TC06002110.hg	OR2A7	5.95995	0.975919	2.54828	-2.28925	0.416679	7.68362	1.29674049276218e-13 .	4 x 45	7 q35	olfactory receptor family 2 subfamily A member 7
TC01005322.hg	181	TC01005322.hg		5.29344	0.654618	2.54729	-1.30805	0.823094	24.2956	0 .	15 x 45
TC01005749.hg	182	TC01005749.hg	ZNF697	5.0775	0.732631	2.53843	-1.4437	0.314235	5.5486	3.32727767560215e-08 .	7 x 45	1 p12	zinc finger protein 697
TC05002950.hg	183	TC05002950.hg	PRLR	7.3694	0.908397	2.53444	-2.42267	0.318467	5.63169	2.1631664126609e-08 .	3 x 44	5 p13	prolactin receptor
TC10002529.hg	184	TC10002529.hg		5.35438	0.836238	2.52358	-2.49307	0.723299	17.5584	0 .	14 x 45
TC09001366.hg	185	TC09001366.hg	PTCH1	7.6199	0.62345	2.52163	-1.32596	0.250026	4.32867	1.0441145365192e-05 .	4 x 45	9 q22	patched 1
TC13001592.hg	186	TC13001592.hg	RBM26	6.82664	0.888601	2.52078	-2.37523	0.731287	17.9727	0 .	7 x 45	13 q31	RNA binding motif protein 26
TC06002094.hg	187	TC06002094.hg		4.15313	0.809506	2.51937	-1.62982	0.754863	19.2928	0 .	13 x 45
TC02001886.hg	188	TC02001886.hg	BCL11A	5.77652	0.801233	2.51886	-2.27354	0.826487	24.6101	0 .	11 x 45	2 p16	BAF chromatin remodeling complex subunit BCL11A
TC21000050.hg	189	TC21000050.hg		5.05388	0.88068	2.51659	-2.27732	0.724814	17.6358	0 .	12 x 45	21 q21
TC06002411.hg	190	TC06002411.hg		4.97193	0.701913	2.5137	-1.2635	0.831376	25.0785	0 .	12 x 45
TC03001088.hg	191	TC03001088.hg		5.32039	0.788483	2.51074	-2.24316	0.698637	16.3685	0 .	16 x 45	3 q29	MUC20 overlapping transcript
TC08002487.hg	192	TC08002487.hg		6.42504	0.92512	2.50864	-2.26793	0.639761	13.9536	0 .	15 x 45
TC10001145.hg	193	TC10001145.hg		6.99425	0.665811	2.50838	-1.53129	0.640693	13.988	0 .	13 x 45	10 p11	microRNA 604
TC03002239.hg	194	TC03002239.hg		3.55981	0.645361	2.50703	-1.18817	0.658239	14.6572	0 .	11 x 43
TC08001550.hg	195	TC08001550.hg		6.41378	0.919887	2.50097	-2.36452	0.639439	13.9417	0 .	15 x 45
TC13001252.hg	196	TC13001252.hg		5.75362	0.789291	2.49874	-1.67628	0.810881	23.2272	0 .	13 x 45
TC06002630.hg	197	TC06002630.hg		3.27313	0.827339	2.49483	-1.48205	0.751537	19.0969	0 .	13 x 45
TC08002402.hg	198	TC08002402.hg		4.89412	0.434183	2.48775	-0.825216	0.71026	16.9136	0 .	9 x 44
TC01000698.hg	199	TC01000698.hg		6.14174	0.621373	2.48344	-1.07557	0.485424	9.30732	0 .	8 x 45
TC13000322.hg	200	TC13000322.hg	MIR17	4.63225	0.48372	2.48276	-0.891065	0.687459	15.8683	0 .	9 x 44	13 q31	miR-17-92a-1 cluster host gene
TC12000208.hg	201	TC12000208.hg	MGST1	5.03656	0.58416	2.47965	-1.05864	0.695066	16.2062	0 .	11 x 44	12 p12	microsomal glutathione S-transferase 1
TC13000924.hg	202	TC13000924.hg		5.28025	0.610812	2.47822	-0.940006	0.57653	11.828	0 .	10 x 43
TC15002371.hg	203	TC15002371.hg		4.50202	0.628713	2.47767	-1.00979	0.541002	10.7831	0 .	8 x 45	15 q26	novel transcript
TC0Y000098.hg	204	TC0Y000098.hg		5.30101	0.733573	2.47663	-2.50126	0.525175	10.345	0 .	14 x 43	15 q25	dynamin 1 pseudogene 41
TC0Y000205.hg	205	TC0Y000205.hg		5.30101	0.733573	2.47663	-2.50126	0.525175	10.345	0 .	14 x 43	15 q25	dynamin 1 pseudogene 41
TC15000772.hg	206	TC15000772.hg		5.30101	0.733573	2.47663	-2.50126	0.525175	10.345	0 .	14 x 43	15 q25	dynamin 1 pseudogene 41
TC15000779.hg	207	TC15000779.hg		5.30101	0.733573	2.47663	-2.50126	0.525175	10.345	0 .	14 x 43	15 q25	dynamin 1 pseudogene 41
TC15000785.hg	208	TC15000785.hg		5.30101	0.733573	2.47663	-2.50126	0.525175	10.345	0 .	14 x 43	15 q25	dynamin 1 pseudogene 41
TC15000807.hg	209	TC15000807.hg		5.30101	0.733573	2.47663	-2.50126	0.525175	10.345	0 .	14 x 43	15 q25	dynamin 1 pseudogene 41
TC15000811.hg	210	TC15000811.hg		5.30101	0.733573	2.47663	-2.50126	0.525175	10.345	0 .	14 x 43	15 q25	dynamin 1 pseudogene 41
TC15000826.hg	211	TC15000826.hg		5.30101	0.733573	2.47663	-2.50126	0.525175	10.345	0 .	14 x 43	15 q25	dynamin 1 pseudogene 41
TC15001740.hg	212	TC15001740.hg		5.30101	0.733573	2.47663	-2.50126	0.525175	10.345	0 .	14 x 43	15 q25	dynamin 1 pseudogene 41
TC15001742.hg	213	TC15001742.hg		5.30101	0.733573	2.47663	-2.50126	0.525175	10.345	0 .	14 x 43	15 q25	dynamin 1 pseudogene 41
TC15001747.hg	214	TC15001747.hg		5.30101	0.733573	2.47663	-2.50126	0.525175	10.345	0 .	14 x 43	15 q25	dynamin 1 pseudogene 41
TC15001751.hg	215	TC15001751.hg		5.30101	0.733573	2.47663	-2.50126	0.525175	10.345	0 .	14 x 43	15 q25	dynamin 1 pseudogene 41
TC15001753.hg	216	TC15001753.hg		5.30101	0.733573	2.47663	-2.50126	0.525175	10.345	0 .	14 x 43	15 q25	dynamin 1 pseudogene 41
TC15001770.hg	217	TC15001770.hg		5.30101	0.733573	2.47663	-2.50126	0.525175	10.345	0 .	14 x 43	15 q25	dynamin 1 pseudogene 41
TC07001979.hg	218	TC07001979.hg	OR2A7	6.44521	1.01696	2.47598	-2.51466	0.404852	7.42202	6.89004409082372e-13 .	4 x 45	7 q35	olfactory receptor family 2 subfamily A member 7
TC01002720.hg	219	TC01002720.hg		4.87496	0.743161	2.4621	-1.07411	0.526922	10.3926	0 .	7 x 45	1 p31	novel transcript
TC15000025.hg	220	TC15000025.hg		5.25386	0.898051	2.46114	-2.89058	0.544173	10.8728	0 .	17 x 45	15 q13	novel transcript, antisense to AC026150.11
TC15000138.hg	221	TC15000138.hg		5.25386	0.898051	2.46114	-2.89058	0.544173	10.8728	0 .	17 x 45	15 q13	novel transcript, antisense to AC026150.11
TC15000149.hg	222	TC15000149.hg		5.25386	0.898051	2.46114	-2.89058	0.544173	10.8728	0 .	17 x 45	15 q13	novel transcript, antisense to AC026150.11
TC15000208.hg	223	TC15000208.hg		5.25386	0.898051	2.46114	-2.89058	0.544173	10.8728	0 .	17 x 45	15 q13	novel transcript, antisense to AC026150.11
TC15001013.hg	224	TC15001013.hg		5.25386	0.898051	2.46114	-2.89058	0.544173	10.8728	0 .	17 x 45	15 q13	novel transcript, antisense to AC026150.11
TC15001052.hg	225	TC15001052.hg		5.25386	0.898051	2.46114	-2.89058	0.544173	10.8728	0 .	17 x 45	15 q13	novel transcript, antisense to AC026150.11
TC15001060.hg	226	TC15001060.hg		5.25386	0.898051	2.46114	-2.89058	0.544173	10.8728	0 .	17 x 45	15 q13	novel transcript, antisense to AC026150.11
TC15001064.hg	227	TC15001064.hg		5.25386	0.898051	2.46114	-2.89058	0.544173	10.8728	0 .	17 x 45	15 q13	novel transcript, antisense to AC026150.11
TC15001094.hg	228	TC15001094.hg		5.25386	0.898051	2.46114	-2.89058	0.544173	10.8728	0 .	17 x 45	15 q13	novel transcript, antisense to AC026150.11
TC15001114.hg	229	TC15001114.hg		5.25386	0.898051	2.46114	-2.89058	0.544173	10.8728	0 .	17 x 45	15 q13	novel transcript, antisense to AC026150.11
TC15001128.hg	230	TC15001128.hg		5.25386	0.898051	2.46114	-2.89058	0.544173	10.8728	0 .	17 x 45	15 q13	novel transcript, antisense to AC026150.11
TC15001155.hg	231	TC15001155.hg		5.25386	0.898051	2.46114	-2.89058	0.544173	10.8728	0 .	17 x 45	15 q13	novel transcript, antisense to AC026150.11
TC11000741.hg	232	TC11000741.hg		6.53996	0.635811	2.45814	-1.20347	0.669107	15.0926	0 .	11 x 44	11 p15	novel transcript
TC08000102.hg	233	TC08000102.hg		5.71728	0.722327	2.45768	-1.51369	0.6786	15.4871	0 .	17 x 45
TC08000936.hg	234	TC08000936.hg		5.71728	0.722327	2.45768	-1.51369	0.6786	15.4871	0 .	17 x 45
TC13000064.hg	235	TC13000064.hg	NUP58	7.65379	0.469836	2.44292	-1.25952	0.475887	9.07022	0 .	6 x 45	13 q12	nucleoporin 58
TC07003097.hg	236	TC07003097.hg		5.91022	0.631775	2.44064	-1.42259	0.878926	30.8905	0 .	12 x 45
TC02002014.hg	237	TC02002014.hg		4.28282	0.763845	2.43984	-1.33519	0.534589	10.6037	0 .	9 x 45
TC02002599.hg	238	TC02002599.hg		4.54909	0.702787	2.43636	-1.23428	0.663547	14.8677	0 .	10 x 45	2 q32	FSIP2 antisense RNA 1
TC20001136.hg	239	TC20001136.hg	KIZ	6.40623	0.708003	2.43334	-1.34795	0.476422	9.08341	0 .	8 x 45	20 p11	kizuna centrosomal protein
TC08002488.hg	240	TC08002488.hg		4.93401	0.833185	2.43258	-2.12834	0.787915	21.4488	0 .	12 x 45
TC07002232.hg	241	TC07002232.hg		5.12809	0.591461	2.43193	-1.0217	0.824127	24.3905	0 .	12 x 45
TC20000139.hg	242	TC20000139.hg	KIZ	6.39797	0.686925	2.43094	-1.15682	0.483302	9.25419	0 .	8 x 45	20 p11	kizuna centrosomal protein
TC20000909.hg	243	TC20000909.hg		5.44152	0.639017	2.42817	-1.20068	0.723343	17.5606	0 .	12 x 45
TC12002424.hg	244	TC12002424.hg	HMGA2	3.21739	0.679834	2.42611	-1.08481	0.511196	9.9704	0 .	10 x 43	12 q14	high mobility group AT-hook 2
TC12003203.hg	245	TC12003203.hg	ZNF891	4.29938	0.629124	2.42416	-1.28278	0.744143	18.6732	0 .	11 x 45	12 q24	zinc finger protein 891
TC12002267.hg	246	TC12002267.hg		4.91264	0.655912	2.4168	-1.28472	0.594121	12.3814	0 .	11 x 44	12 p12	novel transcript
TC04001942.hg	247	TC04001942.hg	PI4K2B	4.83075	0.591225	2.41474	-1.25376	0.528369	10.4322	0 .	8 x 45	4 p15	SEPSECS antisense RNA 1 (head to head)
TC08000104.hg	248	TC08000104.hg		4.74119	0.720482	2.41356	-1.40546	0.649091	14.3034	0 .	16 x 45
TC13001567.hg	249	TC13001567.hg	DACH1	8.37031	1.13787	2.4106	-2.60726	0.517934	10.1496	0 .	4 x 45	13 q21	dachshund family transcription factor 1
TC04000003.hg	250	TC04000003.hg		5.23934	0.781571	2.40979	-2.34727	0.627563	13.5119	0 .	12 x 45
TC01005532.hg	251	TC01005532.hg		4.67498	0.744315	2.4093	-1.2919	0.533412	10.5711	0 .	7 x 45	1 p31	novel transcript
TC12001243.hg	252	TC12001243.hg	TAS2R30	5.47703	0.850133	2.40597	-1.68074	0.771841	20.3493	0 .	16 x 45	CHR_HSCHR12_2_CTG2 p13	taste 2 receptor member 30
TC01006217.hg	253	TC01006217.hg	GNG4	5.27199	0.954825	2.40382	-1.5296	0.195547	3.3425	0.000471437404297781 .	4 x 45	1 q42	G protein subunit gamma 4
TC06002633.hg	254	TC06002633.hg		5.14521	0.674097	2.40009	-1.52688	0.770687	20.2743	0 .	13 x 45
TC20001464.hg	255	TC20001464.hg		6.30684	0.768517	2.39964	-1.77647	0.76145	19.6911	0 .	12 x 45
TC13001312.hg	256	TC13001312.hg		8.58225	0.761589	2.39909	-1.55943	0.737918	18.3285	0 .	13 x 45
TC02004356.hg	257	TC02004356.hg		5.42689	0.749089	2.39822	-1.48785	0.638745	13.9161	0 .	10 x 45
TC17001723.hg	258	TC17001723.hg		5.76842	0.748224	2.39771	-1.50316	0.683842	15.7111	0 .	12 x 45	17 q22	novel transcript
TC01001851.hg	259	TC01001851.hg	DNAH14	3.90897	0.644262	2.39743	-1.03249	0.561808	11.384	0 .	8 x 45	1 q42	dynein axonemal heavy chain 14
TC20001055.hg	260	TC20001055.hg		4.82774	0.517354	2.39389	-1.06514	0.539991	10.7547	0 .	9 x 45	20 p13	SDCBP2 antisense RNA 1
TC14001676.hg	261	TC14001676.hg		6.09658	0.630531	2.39375	-1.3385	0.706464	16.7326	0 .	13 x 43
TC06002318.hg	262	TC06002318.hg		6.38331	0.542137	2.39175	-1.23133	0.39006	7.10108	5.08049158298718e-12 .	7 x 44	6 q27	long intergenic non-protein coding RNA 1558
TC20000863.hg	263	TC20000863.hg		6.95303	1.04404	2.3915	-2.3407	0.707461	16.7799	0 .	4 x 45	20 q13	novel transcript, antisense to R3HDML
TC06002862.hg	264	TC06002862.hg		5.28761	0.888079	2.38933	-2.07535	0.800732	22.4077	0 .	13 x 45
TC16000275.hg	265	TC16000275.hg		6.16774	0.756593	2.38792	-2.1136	0.558132	11.2757	0 .	10 x 43
TC13000086.hg	266	TC13000086.hg		4.94841	0.927721	2.3847	-2.05581	0.852919	27.3876	0 .	14 x 45	13 q12	RNA, U6 small nuclear 82, pseudogene
TC08000448.hg	267	TC08000448.hg		5.05325	0.701198	2.38145	-1.45712	0.699618	16.4135	0 .	13 x 45	8 q13	RNA, 5S ribosomal pseudogene 268
TC10000453.hg	268	TC10000453.hg		4.24201	0.702692	2.37777	-1.44678	0.677968	15.4604	0 .	13 x 45
TC02000757.hg	269	TC02000757.hg		4.56088	0.747461	2.3765	-1.78614	0.815041	23.5804	0 .	13 x 45
TC05001894.hg	270	TC05001894.hg		4.47441	0.706429	2.37637	-1.49477	0.56376	11.4419	0 .	11 x 43	5 q32	novel transcript
TC06003311.hg	271	TC06003311.hg		5.45357	0.934119	2.3731	-2.27403	0.768737	20.1487	0 .	13 x 45
TC13000621.hg	272	TC13000621.hg		6.47631	0.617625	2.37033	-1.30602	0.395597	7.22042	2.43316478076849e-12 .	5 x 45	13 q14	tumor suppressor candidate 8
TC13001380.hg	273	TC13001380.hg		4.22318	0.632998	2.36774	-1.39974	0.678871	15.4986	0 .	8 x 45	13 q12	long intergenic non-protein coding RNA 412
TC0X002128.hg	274	TC0X002128.hg		6.18765	0.731451	2.36603	-1.66143	0.79324	21.8376	0 .	15 x 45
TC13000413.hg	275	TC13000413.hg		8.28486	0.732221	2.36446	-1.45361	0.705363	16.6807	0 .	12 x 45
TC09000642.hg	276	TC09000642.hg		4.08773	0.519286	2.36306	-0.945553	0.65192	14.4116	0 .	10 x 45	9 q33	microRNA 181b-2
TC09001950.hg	277	TC09001950.hg		6.07423	0.703926	2.35886	-1.93026	0.68669	15.8347	0 .	16 x 45	4 q28	novel transcript
TC15001156.hg	278	TC15001156.hg		5.19728	0.880747	2.35879	-2.72692	0.545174	10.9013	0 .	17 x 45	15 q13	novel transcript, antisense to AC026150.11
TC11001998.hg	279	TC11001998.hg		5.26098	0.815469	2.35515	-2.34414	0.782929	21.0964	0 .	13 x 45	11 q13	RNA binding protein, fox-1 homolog (C. elegans) 1 (RBFOX1) pseudogene
TC11002782.hg	280	TC11002782.hg		5.37908	0.663415	2.3543	-1.78567	0.556129	11.217	0 .	12 x 43
TC13000079.hg	281	TC13000079.hg		7.61561	0.554178	2.35189	-1.07934	0.319463	5.65131	1.95276959047419e-08 .	4 x 45
TC09001175.hg	282	TC09001175.hg		7.74158	0.949283	2.34958	-2.27222	0.558523	11.2871	0 .	15 x 45
TC02003439.hg	283	TC02003439.hg		5.26158	0.606578	2.34851	-1.39479	0.756523	19.3919	0 .	10 x 45
TC0X000956.hg	284	TC0X000956.hg		4.90599	0.624545	2.34546	-1.47119	0.677656	15.4472	0 .	14 x 44	X p11
TC09002109.hg	285	TC09002109.hg		5.66031	0.710622	2.34431	-1.33136	0.236525	4.08068	2.92814115665507e-05 .	4 x 44	9 q22	prostate cancer associated transcript 7
TC0X002141.hg	286	TC0X002141.hg	RPS6KA6	4.33462	1.00882	2.33659	-1.84144	0.268855	4.67911	2.24224368650106e-06 .	3 x 45	X q21	ribosomal protein S6 kinase A6
TC05000500.hg	287	TC05000500.hg		6.49649	0.955743	2.33462	-2.14006	0.58799	12.1856	0 .	9 x 45	5 q21	long intergenic non-protein coding RNA 2163
TC09001986.hg	288	TC09001986.hg		3.37513	0.68854	2.32824	-1.26444	0.603738	12.6953	0 .	14 x 43
TC0X002127.hg	289	TC0X002127.hg		7.34679	0.745063	2.32784	-1.99303	0.823365	24.3203	0 .	15 x 45
TC01001056.hg	290	TC01001056.hg		7.80495	1.01938	2.32583	-2.99646	0.618385	13.1904	0 .	16 x 45
TC01003077.hg	291	TC01003077.hg		7.80495	1.01938	2.32583	-2.99646	0.618385	13.1904	0 .	16 x 45
TC03000938.hg	292	TC03000938.hg		4.20836	0.648538	2.32179	-1.20095	0.660534	14.7478	0 .	9 x 45
TC0X002130.hg	293	TC0X002130.hg		6.50561	0.977662	2.32091	-2.41743	0.812662	23.3772	0 .	15 x 45	X q13	novel transcript, sense intronic FTX
TC06003952.hg	294	TC06003952.hg		5.4303	0.73639	2.3205	-1.61535	0.592885	12.3416	0 .	13 x 45
TC13000153.hg	295	TC13000153.hg		4.828	0.755006	2.31785	-1.43749	0.819638	23.9834	0 .	12 x 45
TC09000265.hg	296	TC09000265.hg		6.23284	0.708899	2.31605	-1.7911	0.692059	16.0715	0 .	16 x 45	4 q28	novel transcript
TC20001316.hg	297	TC20001316.hg	VAPB	7.54007	0.68192	2.31432	-1.54104	0.406257	7.45285	5.66990898676067e-13 .	4 x 45	20 q13	VAMP associated protein B and C
TC0X001157.hg	298	TC0X001157.hg		7.45381	0.814996	2.31252	-2.1208	0.751985	19.1231	0 .	15 x 45	X q13	FTX transcript, XIST regulator
TC12002057.hg	299	TC12002057.hg		6.8763	0.976375	2.31124	-2.50321	0.692107	16.0736	0 .	10 x 45	12 q24	HNF1A antisense RNA 1
TC18000510.hg	300	TC18000510.hg		4.23105	0.827105	2.31014	-2.17792	0.724447	17.617	0 .	11 x 45	18 q21	microRNA 4320
TC09002827.hg	301	TC09002827.hg	ABO	6.2237	0.890932	2.31012	-2.05974	0.477088	9.09984	0 .	3 x 45	9 q34	ABO, alpha 1-3-N-acetylgalactosaminyltransferase and alpha 1-3-galactosyltransferase
TC01005399.hg	302	TC01005399.hg		5.24043	0.55683	2.30864	-1.54742	0.547434	10.9657	0 .	8 x 44
TC06003042.hg	303	TC06003042.hg		4.72814	0.54582	2.30564	-1.23994	0.628632	13.5499	0 .	10 x 44
TC14001771.hg	304	TC14001771.hg		5.10127	0.753532	2.30545	-1.88258	0.750476	19.0351	0 .	16 x 45
TC05001733.hg	305	TC05001733.hg		3.51589	0.59786	2.30447	-1.04749	0.740232	18.4554	0 .	12 x 45	5 q23	novel transcript
TC02002015.hg	306	TC02002015.hg		5.97354	0.938973	2.30283	-1.54909	0.362328	6.51652	1.65934377349686e-10 .	5 x 45
TC13000506.hg	307	TC13000506.hg	USP12	8.63019	0.512118	2.29981	-1.43714	0.538742	10.7196	0 .	6 x 45	13 q12	ubiquitin specific peptidase 12
TC06002976.hg	308	TC06002976.hg		4.89232	0.809645	2.29893	-1.73423	0.706761	16.7467	0 .	17 x 45
TC0X002048.hg	309	TC0X002048.hg		5.69493	0.62664	2.29863	-1.11487	0.632772	13.6984	0 .	13 x 43
TC20001671.hg	310	TC20001671.hg	PMEPA1	8.478	1.00937	2.29082	-2.58839	0.290255	5.08444	3.37187086474344e-07 .	3 x 45	20 q13	prostate transmembrane protein, androgen induced 1
TC01002339.hg	311	TC01002339.hg	HNRNPR	5.98096	0.600098	2.2902	-1.28233	0.75823	19.4946	0 .	17 x 44	1 p36	heterogeneous nuclear ribonucleoprotein R
TC19001337.hg	312	TC19001337.hg		6.02385	0.867871	2.28777	-2.57852	0.622525	13.3343	0 .	16 x 45	19 p13	novel transcript
TC08001665.hg	313	TC08001665.hg		5.93135	0.770731	2.28413	-1.97047	0.713031	17.0475	0 .	13 x 45	8 q24	novel transcript
TC04000949.hg	314	TC04000949.hg		5.46247	0.629741	2.27539	-1.34307	0.804874	22.7352	0 .	14 x 45
TC0X001156.hg	315	TC0X001156.hg		7.08163	0.683523	2.27075	-1.64141	0.799371	22.3021	0 .	14 x 45	X q13	FTX transcript, XIST regulator
TC13001251.hg	316	TC13001251.hg		4.93003	0.681484	2.27046	-1.46845	0.814893	23.5676	0 .	13 x 45
TC04001138.hg	317	TC04001138.hg		3.76708	0.631039	2.26585	-1.29075	0.716172	17.2013	0 .	13 x 45	4 p14	microRNA 4802
TC0X000817.hg	318	TC0X000817.hg		7.54178	0.913177	2.26324	-1.81738	0.29416	5.15928	2.34541808641353e-07 .	7 x 45	X p22	novel transcript
TC20000891.hg	319	TC20000891.hg	SPATA25	6.04071	0.646929	2.26321	-1.31007	0.618997	13.2116	0 .	10 x 43	20 q13	spermatogenesis associated 25
TC13000879.hg	320	TC13000879.hg		7.37919	0.919624	2.26268	-2.50494	0.810765	23.2176	0 .	14 x 45	13 q34	ANKRD10 intronic transcript 1
TC06002634.hg	321	TC06002634.hg		4.59037	0.630128	2.26255	-1.27911	0.731609	17.9897	0 .	12 x 45
TC13001247.hg	322	TC13001247.hg	FARP1	8.15415	0.992485	2.26173	-3.21408	0.560097	11.3335	0 .	3 x 45	13 q32	FERM, ARH/RhoGEF and pleckstrin domain protein 1
TC01005769.hg	323	TC01005769.hg		7.47091	0.896635	2.26168	-2.88467	0.763987	19.8483	0 .	15 x 45
TC13000420.hg	324	TC13000420.hg		5.97437	0.733323	2.25911	-1.53556	0.791971	21.7438	0 .	13 x 45
TC19001846.hg	325	TC19001846.hg		6.71658	0.670677	2.25367	-1.24597	0.76182	19.7139	0 .	12 x 45	CHR_HSCHR19_4_CTG3_1 q13	novel transcript
TC15001206.hg	326	TC15001206.hg		4.50315	0.674735	2.25028	-1.51706	0.685994	15.8043	0 .	11 x 44	15 q14	microRNA 3942
TC01001165.hg	327	TC01001165.hg		5.16046	0.808491	2.25001	-2.28792	0.74376	18.6517	0 .	15 x 45
TC13000510.hg	328	TC13000510.hg	MTIF3	7.12719	0.595627	2.24947	-1.39973	0.389038	7.07916	5.81124037779546e-12 .	5 x 45	13 q12	mitochondrial translational initiation factor 3
TC05002247.hg	329	TC05002247.hg		5.19022	0.803734	2.2484	-2.19051	0.661189	14.7738	0 .	10 x 45
TC14000464.hg	330	TC14000464.hg		5.04596	0.725756	2.24737	-1.88306	0.742187	18.5638	0 .	16 x 45
TC17000807.hg	331	TC17000807.hg	MAP2K6	6.72961	0.806523	2.24318	-2.31587	0.44335	8.29131	2.33146835171283e-15 .	3 x 45	17 q24	mitogen-activated protein kinase kinase 6
TC16001005.hg	332	TC16001005.hg	NPIPB5	8.60906	0.857965	2.24142	-2.15949	0.715844	17.1852	0 .	15 x 45	16 p12	nuclear pore complex interacting protein family member B5
TC16001024.hg	333	TC16001024.hg	NPIPB5	8.60906	0.857965	2.24142	-2.15949	0.715844	17.1852	0 .	15 x 45	16 p12	nuclear pore complex interacting protein family member B5
TC06000746.hg	334	TC06000746.hg		7.59898	0.847553	2.24026	-2.12756	0.707611	16.787	0 .	16 x 45	6 q14	RNA, U6 small nuclear 1016, pseudogene
TC12000873.hg	335	TC12000873.hg	MAPKAPK5	6.33343	0.672887	2.24016	-1.50244	0.781435	20.9928	0 .	10 x 45	12 q24	MAPK activated protein kinase 5
TC13000068.hg	336	TC13000068.hg	CDK8	7.80053	0.670627	2.23943	-1.77393	0.422072	7.80445	5.92859095149834e-14 .	4 x 45	13 q12	cyclin dependent kinase 8
TC09000093.hg	337	TC09000093.hg		5.59708	0.638264	2.23907	-1.5925	0.715123	17.1497	0 .	14 x 45
TC13000347.hg	338	TC13000347.hg	FARP1	8.09168	0.978192	2.23888	-3.05805	0.565667	11.4988	0 .	3 x 45	13 q32	FERM, ARH/RhoGEF and pleckstrin domain protein 1
TC01001213.hg	339	TC01001213.hg		4.10741	0.686945	2.23861	-1.33262	0.685143	15.7674	0 .	11 x 45	1 q21	microRNA 554
TC01003094.hg	340	TC01003094.hg		6.18345	0.833253	2.23118	-2.68858	0.753997	19.2415	0 .	15 x 45
TC11002201.hg	341	TC11002201.hg		4.88192	0.696401	2.23099	-1.43226	0.657179	14.6157	0 .	13 x 45	11 q21	novel transcript
TC13001461.hg	342	TC13001461.hg		6.03175	0.567362	2.22641	-1.10052	0.357828	6.42362	2.83328360772828e-10 .	5 x 45	13 q14	tumor suppressor candidate 8
TC20001465.hg	343	TC20001465.hg		5.17014	0.664427	2.22524	-1.20889	0.748129	18.8997	0 .	13 x 45
TC04001192.hg	344	TC04001192.hg		5.84804	0.85608	2.21497	-2.21098	0.61268	12.995	0 .	16 x 45
TC12002775.hg	345	TC12002775.hg		4.3603	0.587839	2.2149	-1.0804	0.714505	17.1195	0 .	10 x 45	12 p12	novel transcript, overlapping HIST4H4
TC13001597.hg	346	TC13001597.hg		4.65327	0.461123	2.2125	-1.04357	0.479981	9.17147	0 .	7 x 45	13 q31	novel transcript
TC02004741.hg	347	TC02004741.hg		4.48656	0.726225	2.21132	-1.5021	0.78604	21.3151	0 .	11 x 45	2 q32	novel transcript
TC0X000987.hg	348	TC0X000987.hg		5.92258	0.661765	2.20754	-1.46583	0.606081	12.7731	0 .	11 x 44	X p11	long intergenic non-protein coding RNA 2595
TC02000876.hg	349	TC02000876.hg		4.42217	0.773024	2.20754	-1.76019	0.737292	18.2945	0 .	14 x 45	2 q21	RNA, 5S ribosomal pseudogene 104
TC04000283.hg	350	TC04000283.hg		6.93569	0.917768	2.20534	-2.17338	0.609668	12.8932	0 .	16 x 45
TC09002185.hg	351	TC09002185.hg		4.41393	0.701015	2.20514	-1.53715	0.62474	13.412	0 .	7 x 45
TC06003300.hg	352	TC06003300.hg		3.61569	0.808353	2.20401	-1.43396	0.73968	18.425	0 .	12 x 45
TC15002482.hg	353	TC15002482.hg		3.4158	0.555782	2.20341	-0.860571	0.697772	16.329	0 .	13 x 43
TC15001281.hg	354	TC15001281.hg		5.33352	0.629276	2.20205	-1.54324	0.699287	16.3983	0 .	9 x 44	15 q15	novel transcript, sense intronic to CATSPER2
TC06001997.hg	355	TC06001997.hg	SESN1	6.7213	0.718614	2.20139	-1.57522	0.50159	9.71925	0 .	8 x 45	6 q21	sestrin 1
TC07001760.hg	356	TC07001760.hg		5.31619	0.774974	2.19842	-1.84006	0.816541	23.7104	0 .	13 x 45
TC06002266.hg	357	TC06002266.hg		5.42407	0.71034	2.19356	-1.51686	0.585505	12.1071	0 .	13 x 45
TC21000186.hg	358	TC21000186.hg		6.15394	0.674345	2.191	-1.3959	0.594874	12.4057	0 .	12 x 45	21 q22	BACE2 intronic transcript 1
TC0X000815.hg	359	TC0X000815.hg		7.42116	0.765876	2.18906	-1.72435	0.344056	6.14243	1.38419031792125e-09 .	7 x 45	X p22	novel transcript
TC13000825.hg	360	TC13000825.hg	DOCK9	7.66576	0.541434	2.18851	-1.43839	0.413212	7.60645	2.1316282072803e-13 .	6 x 45	13 q32	dedicator of cytokinesis 9
TC13001042.hg	361	TC13001042.hg		5.31568	0.830142	2.18775	-1.51558	0.744102	18.671	0 .	13 x 45
TC08002453.hg	362	TC08002453.hg		5.89653	0.623814	2.18687	-1.74451	0.590571	12.2676	0 .	9 x 45	8 q22	ZNF706 neighboring transcript 1
TC02003247.hg	363	TC02003247.hg		4.129	0.58967	2.18668	-1.43079	0.617776	13.1694	0 .	10 x 45
TC13000174.hg	364	TC13000174.hg		4.51017	0.628554	2.18626	-1.55759	0.746231	18.7913	0 .	12 x 45	13 q14	novel transcript
TC02002263.hg	365	TC02002263.hg	TFCP2L1	7.41158	0.859634	2.18477	-2.20891	0.231498	3.98898	4.23505521249812e-05 .	3 x 45	2 q14	transcription factor CP2 like 1
TC12003126.hg	366	TC12003126.hg		6.22466	0.721483	2.18403	-1.89868	0.687404	15.8659	0 .	10 x 45	12 q24	HNF1A antisense RNA 1
TC13001653.hg	367	TC13001653.hg		5.33307	0.593227	2.18277	-1.19026	0.691784	16.0592	0 .	14 x 44
TC13000823.hg	368	TC13000823.hg		5.33687	0.588667	2.18247	-1.22048	0.690969	16.023	0 .	14 x 44
TC07001918.hg	369	TC07001918.hg		3.69858	0.580874	2.18159	-1.18256	0.70534	16.6796	0 .	11 x 45	7 q34
TC09000883.hg	370	TC09000883.hg	SPATA6L	5.38246	0.534017	2.17842	-0.977303	0.615781	13.1008	0 .	9 x 45	9 p24	spermatogenesis associated 6 like
TC08001784.hg	371	TC08001784.hg		6.00015	0.739578	2.17826	-2.2368	0.732202	18.0211	0 .	13 x 45
TC07003234.hg	372	TC07003234.hg		5.79728	0.720263	2.17802	-1.73325	0.797765	22.1786	0 .	10 x 45	7 q36	novel transcript
TC10002925.hg	373	TC10002925.hg		6.71082	0.708568	2.17474	-1.77655	0.214569	3.6826	0.000138414711263302 .	5 x 45
TC13000763.hg	374	TC13000763.hg	SPRY2	7.79193	0.627837	2.17406	-1.58365	0.374797	6.77672	3.60504959218133e-11 .	5 x 45	13 q31	sprouty RTK signaling antagonist 2
TC06003996.hg	375	TC06003996.hg		5.48329	0.637497	2.17183	-1.36736	0.77895	20.8226	0 .	11 x 45
TC01006047.hg	376	TC01006047.hg		6.24853	0.65723	2.17123	-1.43788	0.598706	12.53	0 .	7 x 45
TC08002044.hg	377	TC08002044.hg		5.38426	0.759166	2.16987	-2.04102	0.790437	21.6313	0 .	11 x 45
TC06000965.hg	378	TC06000965.hg	TRMT11	4.55703	0.601543	2.16796	-1.22321	0.711115	16.9547	0 .	14 x 43	6 q22	tRNA methyltransferase 11 homolog
TC05001154.hg	379	TC05001154.hg		3.5162	0.657844	2.16575	-1.22076	0.576656	11.8319	0 .	12 x 43	5 p15	novel transcript
TC0X001960.hg	380	TC0X001960.hg		7.32797	0.67964	2.1652	-1.64725	0.390233	7.10479	4.96624963375325e-12 .	7 x 45	X p22	novel transcript
TC0X002238.hg	381	TC0X002238.hg		4.68478	0.57226	2.16419	-1.08847	0.749263	18.9649	0 .	13 x 44
TC09001166.hg	382	TC09001166.hg		8.5379	0.909813	2.16187	-2.98304	0.663442	14.8635	0 .	16 x 45	9 p11	microRNA 1299
TC07002425.hg	383	TC07002425.hg		3.98812	0.600198	2.16092	-1.3171	0.789999	21.5994	0 .	12 x 45
TC08002486.hg	384	TC08002486.hg		5.48953	0.720902	2.16051	-1.32908	0.660248	14.7364	0 .	15 x 45
TC12002570.hg	385	TC12002570.hg	MAPKAPK5	6.33004	0.652194	2.16029	-1.71374	0.776079	20.6291	0 .	9 x 45	12 q24	MAPK activated protein kinase 5
TC08002542.hg	386	TC08002542.hg		5.24347	0.784091	2.15909	-1.87722	0.674888	15.3312	0 .	12 x 45	8 q24	novel transcript
TC06002111.hg	387	TC06002111.hg	CTAGE4	6.85209	0.596569	2.1582	-1.40233	0.564822	11.4736	0 .	7 x 45	7 q35	CTAGE family member 4
TC02000867.hg	388	TC02000867.hg		5.46672	0.729816	2.15564	-2.01899	0.779621	20.8684	0 .	12 x 45	2 q21	RN7SK pseudogene 103
TC06003036.hg	389	TC06003036.hg		4.72423	0.645374	2.15498	-1.14223	0.770402	20.2558	0 .	13 x 45
TC13001301.hg	390	TC13001301.hg		5.29653	0.838663	2.15422	-1.9087	0.799859	22.3398	0 .	14 x 45
TC18000919.hg	391	TC18000919.hg	SMAD2	5.33868	0.528939	2.14991	-1.36851	0.564157	11.4537	0 .	8 x 45	18 q21	SMAD family member 2
TC02000612.hg	392	TC02000612.hg		5.96195	0.829562	2.14937	-1.94536	0.726665	17.7311	0 .	12 x 45	2 q11	novel transcript
TC09001085.hg	393	TC09001085.hg		4.16846	0.808176	2.14903	-1.98555	0.676995	15.4194	0 .	14 x 45	9 p13	RNA, U7 small nuclear 124 pseudogene
TC10000393.hg	394	TC10000393.hg		4.8811	0.693726	2.14778	-1.42505	0.4492	8.42815	8.88178419700125e-16 .	5 x 45	10 q21	long intergenic non-protein coding RNA 1515
TC01004729.hg	395	TC01004729.hg		6.70251	0.97489	2.14735	-2.81204	0.757916	19.4756	0 .	16 x 45	1 q21	long intergenic non-protein coding RNA 1145
TC07002999.hg	396	TC07002999.hg		7.10102	0.725151	2.14543	-1.73741	0.852745	27.3672	0 .	14 x 45
TC06003037.hg	397	TC06003037.hg	TRMT11	4.68148	0.641489	2.14447	-1.2052	0.718133	17.2985	0 .	14 x 44	6 q22	tRNA methyltransferase 11 homolog
TC04002594.hg	398	TC04002594.hg		4.05487	0.73539	2.14295	-1.37837	0.267838	4.66005	2.4437751909856e-06 .	3 x 45	4 q13	long intergenic non-protein coding RNA 2562
TC10002069.hg	399	TC10002069.hg		6.96958	0.643388	2.13676	-1.53241	0.812656	23.3766	0 .	14 x 45
TC0X000144.hg	400	TC0X000144.hg		6.21264	0.517862	2.13532	-0.8406	0.668328	15.0608	0 .	9 x 43	X p21	TAB3 antisense RNA 1
TC06002549.hg	401	TC06002549.hg		3.60818	0.596204	2.13224	-1.46048	0.72273	17.5295	0 .	13 x 45
TC09001784.hg	402	TC09001784.hg		4.27121	0.454109	2.13198	-0.847731	0.579967	11.9341	0 .	7 x 44
TC04002149.hg	403	TC04002149.hg		3.49424	0.534249	2.13049	-0.9131	0.603324	12.6816	0 .	8 x 45
TC13001505.hg	404	TC13001505.hg		4.75033	0.560934	2.12997	-1.00665	0.410868	7.5545	2.97095681389692e-13 .	7 x 44	13 q14	guanylate cyclase 1 soluble subunit beta 2 (pseudogene)
TC7_gl000195_random000003.hg	405	TC7_gl000195_random000003.hg		7.01685	0.613255	2.12996	-1.30621	0.615849	13.1032	0 .	10 x 43
TC09002380.hg	406	TC09002380.hg		4.60003	0.607509	2.12874	-1.0365	0.82548	24.516	0 .	11 x 45
TC20000265.hg	407	TC20000265.hg		7.37109	0.757119	2.12818	-1.55406	0.593166	12.3507	0 .	12 x 45
TC0X001186.hg	408	TC0X001186.hg	RPS6KA6	4.94551	0.879607	2.12767	-1.47919	0.281471	4.91712	7.48058934574303e-07 .	4 x 44	X q21	ribosomal protein S6 kinase A6
TC05003061.hg	409	TC05003061.hg		6.7841	0.833782	2.12545	-1.68291	0.78639	21.3399	0 .	16 x 45
TC21000008.hg	410	TC21000008.hg		5.99338	0.590027	2.12447	-1.20514	0.663323	14.8588	0 .	15 x 43
TC12001235.hg	411	TC12001235.hg	TAS2R14	5.18694	0.732211	2.12214	-1.57512	0.803215	22.6029	0 .	15 x 45	CHR_HSCHR12_2_CTG2 p13	taste 2 receptor member 14
TC01006115.hg	412	TC01006115.hg		4.61737	0.602627	2.12116	-1.69864	0.725501	17.6711	0 .	16 x 43
TC13000552.hg	413	TC13000552.hg	N4BP2L2	6.43247	0.84988	2.12077	-1.92762	0.825208	24.4906	0 .	14 x 45	13 q13	NEDD4 binding protein 2 like 2
TC11000333.hg	414	TC11000333.hg	CD44	5.76571	0.874742	2.1197	-2.52691	0.529813	10.4718	0 .	17 x 45	11 p13	CD44 molecule (Indian blood group)
TC02004654.hg	415	TC02004654.hg		5.1203	0.765296	2.11848	-1.29373	0.54144	10.7955	0 .	8 x 45	2 q24	long intergenic non-protein coding RNA 1876
TC06000016.hg	416	TC06000016.hg		4.9053	0.461723	2.11774	-0.965804	0.63873	13.9156	0 .	9 x 45	6 p25	GMDS divergent transcript
TC03000340.hg	417	TC03000340.hg	GNL3	3.57774	0.703845	2.11754	-1.54624	0.689422	15.9545	0 .	12 x 45	3 p21	G protein nucleolar 3
TC13000073.hg	418	TC13000073.hg		7.63085	0.477671	2.11637	-1.02173	0.469753	8.91993	0 .	5 x 45
TC19000542.hg	419	TC19000542.hg	SAMD4B	5.60962	0.657861	2.11473	-1.72457	0.713292	17.0602	0 .	13 x 45	19 q13	sterile alpha motif domain containing 4B
TC10002570.hg	420	TC10002570.hg		6.31789	0.752111	2.1142	-2.02558	0.530805	10.4991	0 .	11 x 43
TC10000821.hg	421	TC10000821.hg		5.59536	0.788015	2.11166	-2.03494	0.752687	19.1643	0 .	13 x 45
TC02002444.hg	422	TC02002444.hg		5.13905	0.760974	2.11052	-1.3176	0.567525	11.5545	0 .	9 x 45	2 q24	long intergenic non-protein coding RNA 1876
TC05003060.hg	423	TC05003060.hg		7.46799	0.90944	2.10937	-2.03316	0.81184	23.3078	0 .	16 x 45
TC05002808.hg	424	TC05002808.hg		5.63689	0.613147	2.10925	-1.11132	0.565776	11.5021	0 .	10 x 45
TC17001648.hg	425	TC17001648.hg	MIR196A1	6.60864	0.84202	2.10893	-2.19031	0.595528	12.4268	0 .	10 x 45	17 q21	microRNA 196a-1
TC13000507.hg	426	TC13000507.hg		3.74555	0.585411	2.10822	-1.06704	0.610136	12.909	0 .	9 x 45	13 q12	long intergenic non-protein coding RNA 412
TC13000974.hg	427	TC13000974.hg	CDK8	6.48194	0.704734	2.10813	-1.64985	0.314722	5.55815	3.16737949201951e-08 .	4 x 45	13 q12	cyclin dependent kinase 8
TC07003086.hg	428	TC07003086.hg		8.22322	1.049	2.10758	-3.62828	0.520789	10.2263	0 .	11 x 44
TC08001269.hg	429	TC08001269.hg	GGH	7.4392	0.72329	2.10413	-1.60956	0.284923	4.98271	5.48712201675627e-07 .	4 x 44	8 q12	gamma-glutamyl hydrolase
TC03002723.hg	430	TC03002723.hg		6.04705	0.728678	2.10239	-1.87122	0.800512	22.3905	0 .	13 x 45
TC09001165.hg	431	TC09001165.hg		7.60465	0.952087	2.09868	-3.0466	0.662351	14.82	0 .	16 x 45	9 p11	microRNA 1299
TC13000502.hg	432	TC13000502.hg	RNF6	7.72167	0.470013	2.09455	-1.13273	0.364795	6.56768	1.23310694988277e-10 .	5 x 45	13 q12	ring finger protein 6
TC13001444.hg	433	TC13001444.hg		5.73421	0.704248	2.09434	-1.53682	0.812604	23.3723	0 .	9 x 45	13 q14	novel transcript
TC02001099.hg	434	TC02001099.hg		3.5393	0.813906	2.09422	-1.91844	0.645058	14.1508	0 .	12 x 45
TC13000069.hg	435	TC13000069.hg		4.92567	0.522966	2.09259	-1.04011	0.740748	18.484	0 .	10 x 45
TC17001354.hg	436	TC17001354.hg		5.73952	0.714105	2.09041	-2.06627	0.74001	18.4432	0 .	14 x 45	17 q11
TC20001585.hg	437	TC20001585.hg		4.39038	0.664463	2.08983	-1.57525	0.822778	24.2667	0 .	13 x 45
TC01000293.hg	438	TC01000293.hg		3.29558	0.507126	2.08575	-0.863674	0.603538	12.6887	0 .	11 x 43	1 p36	microRNA 3115
TC08002021.hg	439	TC08002021.hg		4.76505	0.597133	2.08381	-1.28281	0.537259	10.6781	0 .	10 x 43
TC13001253.hg	440	TC13001253.hg		5.68443	0.63959	2.08335	-1.37647	0.713176	17.0546	0 .	13 x 45
TC08002450.hg	441	TC08002450.hg		6.3948	0.876626	2.08317	-1.80968	0.794937	21.9643	0 .	14 x 45
TC06003301.hg	442	TC06003301.hg		4.00681	0.887677	2.08164	-1.86685	0.765624	19.9509	0 .	13 x 45
TC07001219.hg	443	TC07001219.hg	HOXA2	5.36884	0.797235	2.0789	-1.5087	0.473941	9.02237	0 .	6 x 45	7 p15	homeobox A2
TC12002330.hg	444	TC12002330.hg		5.26192	0.694607	2.07874	-1.48794	0.779598	20.8668	0 .	12 x 45	12 q13	novel transcript
TC07000074.hg	445	TC07000074.hg		5.74418	0.625806	2.07712	-1.53844	0.783544	21.1392	0 .	13 x 45
TC06002925.hg	446	TC06002925.hg		4.946	0.56614	2.07653	-1.29146	0.75938	19.5644	0 .	13 x 44	6 q15
TC17002246.hg	447	TC17002246.hg		5.72501	0.768979	2.07645	-1.63183	0.699867	16.4249	0 .	16 x 45
TC06003131.hg	448	TC06003131.hg		5.6157	0.640003	2.07606	-1.88123	0.830851	25.0274	0 .	14 x 45
TC06000628.hg	449	TC06000628.hg	SLC25A27	6.31258	0.797376	2.07579	-1.88532	0.821318	24.1341	0 .	12 x 45	6 p12	solute carrier family 25 member 27
TC08001486.hg	450	TC08001486.hg		6.40632	0.886535	2.07565	-1.87202	0.79669	22.0966	0 .	14 x 45
TC13000880.hg	451	TC13000880.hg		8.09316	0.876182	2.07557	-2.04905	0.801846	22.4949	0 .	14 x 45
TC09001126.hg	452	TC09001126.hg		5.41267	0.623921	2.07556	-1.55779	0.779299	20.8464	0 .	10 x 45	9 p11	novel pseudogene
TC13001415.hg	453	TC13001415.hg	N4BP2L2	5.99421	0.805076	2.07419	-1.79226	0.832038	25.1434	0 .	14 x 45	13 q13	NEDD4 binding protein 2 like 2
TC16001807.hg	454	TC16001807.hg	NPIPB4	8.72012	0.817851	2.07408	-2.15874	0.790418	21.63	0 .	15 x 45	16 p12	nuclear pore complex interacting protein family member B4
TC13001296.hg	455	TC13001296.hg		4.97773	0.700217	2.07397	-1.44764	0.68056	15.5704	0 .	11 x 45
TC05002423.hg	456	TC05002423.hg		5.41885	0.912505	2.07294	-2.10395	0.722368	17.5111	0 .	16 x 45
TC13001589.hg	457	TC13001589.hg		5.33278	0.686102	2.07264	-1.48484	0.748554	18.9241	0 .	8 x 45
TC05003053.hg	458	TC05003053.hg		6.55489	0.841865	2.07142	-2.19877	0.682718	15.6627	0 .	17 x 45	CHR_HSCHR5_2_CTG1_1	novel transcript
TC16000248.hg	459	TC16000248.hg	NPIPB5	8.79903	0.945883	2.07106	-3.83419	0.825377	24.5064	0 .	16 x 45	16 p12	nuclear pore complex interacting protein family member B5
TC07002535.hg	460	TC07002535.hg		5.14303	0.627836	2.06989	-1.4326	0.775054	20.5608	0 .	12 x 45
TC13000973.hg	461	TC13000973.hg		4.93326	0.526158	2.06968	-0.99578	0.755992	19.3601	0 .	10 x 45
TC01006247.hg	462	TC01006247.hg	HNRNPU	7.53486	0.893495	2.06959	-3.04562	0.799801	22.3353	0 .	16 x 45	1 q44	heterogeneous nuclear ribonucleoprotein U
TC13000411.hg	463	TC13000411.hg	ATP11A	7.83801	0.53376	2.06736	-1.66469	0.462052	8.73358	1.11022302462516e-16 .	6 x 45	13 q34	ATPase phospholipid transporting 11A
TC0X001038.hg	464	TC0X001038.hg	SHROOM4	4.81037	0.612361	2.06665	-1.42542	0.406811	7.46503	5.24913446042774e-13 .	6 x 45	X p11	shroom family member 4
TC01001840.hg	465	TC01001840.hg		6.04689	0.588801	2.06608	-1.52973	0.697518	16.3174	0 .	13 x 43	1 p36	long intergenic non-protein coding RNA 1409
TC06003312.hg	466	TC06003312.hg		3.96378	0.744413	2.06532	-1.43408	0.716753	17.23	0 .	12 x 45
TC06003299.hg	467	TC06003299.hg		4.50602	0.77109	2.0653	-1.72708	0.769279	20.1834	0 .	12 x 45
TC12001236.hg	468	TC12001236.hg	TAS2R50	4.35291	0.592084	2.06529	-1.22276	0.705442	16.6844	0 .	16 x 43	CHR_HSCHR12_2_CTG2 p13	taste 2 receptor member 50
TC13000805.hg	469	TC13000805.hg		5.22045	0.562348	2.06359	-1.18764	0.430794	8.00201	1.62092561595273e-14 .	6 x 45	13 q32	DNAJC3 divergent transcript
TC02003588.hg	470	TC02003588.hg	C2orf27A	6.13936	0.644659	2.06323	-2.25084	0.561711	11.3811	0 .	9 x 45	2 q21	chromosome 2 open reading frame 27A
TC06002410.hg	471	TC06002410.hg		5.59681	0.445677	2.06265	-0.946249	0.75376	19.2275	0 .	10 x 45
TC13000539.hg	472	TC13000539.hg	HSPH1	9.64826	0.761774	2.05876	-2.5651	0.355987	6.38575	3.51830342637527e-10 .	4 x 45	13 q12	heat shock protein family H (Hsp110) member 1
TC7_gl000195_random000004.hg	473	TC7_gl000195_random000004.hg		6.88612	0.638148	2.05857	-1.49832	0.551599	11.0854	0 .	9 x 43
TC12001973.hg	474	TC12001973.hg		5.33383	0.839695	2.05699	-2.5066	0.817584	23.8016	0 .	15 x 45	12 q24
TC08001530.hg	475	TC08001530.hg		2.72704	0.632093	2.05449	-1.14764	0.536309	10.6516	0 .	11 x 43
TC06003378.hg	476	TC06003378.hg		3.99833	0.525749	2.05431	-0.908422	0.735287	18.186	0 .	12 x 43
TC21000113.hg	477	TC21000113.hg	HUNK	7.25616	0.897364	2.05431	-2.09721	0.187905	3.20699	0.000748165260763045 .	3 x 45	21 q22	hormonally up-regulated Neu-associated kinase
TC10002879.hg	478	TC10002879.hg		4.52298	0.682214	2.05379	-1.58285	0.747456	18.8611	0 .	14 x 45
TC07000044.hg	479	TC07000044.hg		6.3582	0.799222	2.05183	-2.47921	0.817128	23.7616	0 .	13 x 45
TC07000429.hg	480	TC07000429.hg	POLR2J3	8.89858	0.699476	2.05132	-1.88606	0.800993	22.4281	0 .	14 x 45	7 q22	RNA polymerase II subunit J3
TC07000462.hg	481	TC07000462.hg	POLR2J3	8.89858	0.699476	2.05132	-1.88606	0.800993	22.4281	0 .	14 x 45	7 q22	RNA polymerase II subunit J3
TC07000490.hg	482	TC07000490.hg	POLR2J3	8.89858	0.699476	2.05132	-1.88606	0.800993	22.4281	0 .	14 x 45	7 q22	RNA polymerase II subunit J3
TC07000656.hg	483	TC07000656.hg	POLR2J3	8.89858	0.699476	2.05132	-1.88606	0.800993	22.4281	0 .	14 x 45	7 q22	RNA polymerase II subunit J3
TC07001531.hg	484	TC07001531.hg	POLR2J3	8.89858	0.699476	2.05132	-1.88606	0.800993	22.4281	0 .	14 x 45	7 q22	RNA polymerase II subunit J3
TC07001665.hg	485	TC07001665.hg	POLR2J3	8.89858	0.699476	2.05132	-1.88606	0.800993	22.4281	0 .	14 x 45	7 q22	RNA polymerase II subunit J3
TC07001708.hg	486	TC07001708.hg	POLR2J3	8.89858	0.699476	2.05132	-1.88606	0.800993	22.4281	0 .	14 x 45	7 q22	RNA polymerase II subunit J3
TC07001711.hg	487	TC07001711.hg	POLR2J3	8.89858	0.699476	2.05132	-1.88606	0.800993	22.4281	0 .	14 x 45	7 q22	RNA polymerase II subunit J3
TC08002449.hg	488	TC08002449.hg	YWHAZ	5.22589	0.55004	2.0499	-1.31367	0.484606	9.2868	0 .	7 x 44	8 q22	tyrosine 3-monooxygenase/tryptophan 5-monooxygenase activation protein zeta
TC06003419.hg	489	TC06003419.hg		4.72339	0.486018	2.04862	-1.07867	0.842587	26.226	0 .	11 x 45
TC09002379.hg	490	TC09002379.hg		4.34185	0.599484	2.04853	-1.39905	0.762466	19.7538	0 .	11 x 45
TC10002694.hg	491	TC10002694.hg	PPA1	4.4011	0.771794	2.04834	-1.85924	0.686403	15.8221	0 .	12 x 45	10 q22	inorganic pyrophosphatase 1
TC16000917.hg	492	TC16000917.hg		4.6325	0.685629	2.04666	-1.40814	0.801891	22.4984	0 .	15 x 45
TC16001809.hg	493	TC16001809.hg		9.5862	0.673939	2.04567	-1.5812	0.721626	17.4736	0 .	15 x 45	16 p12	SMG1 pseudogene 1
TC08002398.hg	494	TC08002398.hg		4.95663	0.614635	2.04393	-1.38213	0.728461	17.8243	0 .	11 x 45
TC20000331.hg	495	TC20000331.hg	HNF4A	4.72009	0.671968	2.04324	-1.37428	0.760014	19.6031	0 .	10 x 45	20 q13	hepatocyte nuclear factor 4 alpha
TC08002102.hg	496	TC08002102.hg		6.30336	0.600263	2.04275	-1.19265	0.627731	13.5178	0 .	12 x 43
TC03003213.hg	497	TC03003213.hg		4.41366	0.747128	2.04202	-1.44913	0.583335	12.039	0 .	13 x 44
TC07001470.hg	498	TC07001470.hg		7.25237	0.6907	2.03799	-1.69492	0.85045	27.1001	0 .	14 x 45
TC08002233.hg	499	TC08002233.hg		7.07772	0.714724	2.03735	-2.0639	0.72756	17.7775	0 .	13 x 45	8 p23	ribosomal protein S3a pseudogene 34
TC03002752.hg	500	TC03002752.hg		8.67237	0.844936	2.03668	-2.26604	0.867418	29.2226	0 .	12 x 45	CHR_HSCHR3_1_CTG3	novel transcript
TC02000861.hg	501	TC02000861.hg	C2orf27A	6.93772	0.639152	2.03404	-2.50737	0.537206	10.6766	0 .	9 x 45	2 q21	chromosome 2 open reading frame 27A
TC0X000813.hg	502	TC0X000813.hg		7.61133	0.7309	2.03383	-1.69741	0.343964	6.14057	1.39854694491959e-09 .	7 x 45	X p22	novel transcript
TC12002762.hg	503	TC12002762.hg	TAS2R30	5.21223	0.778351	2.03336	-1.59021	0.764301	19.8679	0 .	16 x 45	CHR_HSCHR12_2_CTG2 p13	taste 2 receptor member 30
TC20001569.hg	504	TC20001569.hg		5.61349	0.595049	2.0333	-1.08566	0.725647	17.6786	0 .	12 x 44
TC01001057.hg	505	TC01001057.hg		8.79482	0.933076	2.03111	-3.42505	0.650234	14.347	0 .	16 x 45
TC06002413.hg	506	TC06002413.hg		5.15639	0.518794	2.03016	-1.036	0.747752	18.8781	0 .	10 x 45
TC05001249.hg	507	TC05001249.hg		7.70901	0.581155	2.02996	-1.593	0.753553	19.2152	0 .	16 x 44	5 p13	Putative beta-glucuronidase-like protein FLJ75287 pseudogene
TC06001073.hg	508	TC06001073.hg		4.98233	0.681098	2.0285	-1.16812	0.53557	10.631	0 .	11 x 45
TC13000346.hg	509	TC13000346.hg	FARP1	4.97129	0.528424	2.02749	-1.067	0.724098	17.5992	0 .	13 x 43	13 q32	FERM, ARH/RhoGEF and pleckstrin domain protein 1
TC20000330.hg	510	TC20000330.hg	HNF4A	8.49579	0.580176	2.02702	-1.94548	0.320545	5.67264	1.7465327184496e-08 .	3 x 45	20 q13	hepatocyte nuclear factor 4 alpha
TC01005425.hg	511	TC01005425.hg		4.74506	0.663503	2.02566	-1.54529	0.772047	20.3628	0 .	15 x 45
TC08002460.hg	512	TC08002460.hg		4.66127	0.76803	2.02564	-1.84832	0.67193	15.2084	0 .	14 x 45	8 q22	novel transcript
TC07002715.hg	513	TC07002715.hg		4.85934	0.716348	2.02535	-1.81523	0.835981	25.5369	0 .	13 x 45
TC17_ctg5_hap1000002.hg	514	TC17_ctg5_hap1000002.hg	ARL17A	8.19778	0.708606	2.02477	-1.79371	0.613172	13.0118	0 .	12 x 43	17 q21	ADP ribosylation factor like GTPase 17A
TC13000198.hg	515	TC13000198.hg	SETDB2	6.50377	0.485666	2.02451	-1.08395	0.539062	10.7286	0 .	8 x 45	13 q14	SET domain bifurcated histone lysine methyltransferase 2
TC13000085.hg	516	TC13000085.hg	PAN3	8.49843	0.706899	2.02323	-1.92814	0.559665	11.3207	0 .	5 x 45	13 q12	poly(A) specific ribonuclease subunit PAN3
TC07000719.hg	517	TC07000719.hg		5.15457	0.625366	2.02239	-1.29462	0.771991	20.3591	0 .	12 x 45
TC19000670.hg	518	TC19000670.hg		4.44061	0.693074	2.02173	-1.7028	0.698272	16.3518	0 .	17 x 45	19 q13	TEC
TC06002089.hg	519	TC06002089.hg		5.74675	0.696537	2.02147	-1.57976	0.787599	21.4262	0 .	14 x 45	6 q22	RNA, 5S ribosomal pseudogene 217
TC15002360.hg	520	TC15002360.hg		6.39758	0.747464	2.02078	-1.79842	0.783065	21.1058	0 .	16 x 45	15 q26	novel transcript, sense intronic to ZNF710
TC06000585.hg	521	TC06000585.hg		4.42298	0.589492	2.0199	-1.09702	0.763713	19.8312	0 .	15 x 43
TC08001692.hg	522	TC08001692.hg		8.0665	0.68234	2.01944	-1.63567	0.665361	14.9406	0 .	12 x 45	8 q24	novel transcript
TC10001089.hg	523	TC10001089.hg	NEBL	5.74262	0.632002	2.01605	-1.48787	0.662374	14.8209	0 .	5 x 45	10 p12	nebulette
TC08002390.hg	524	TC08002390.hg		5.84311	0.74341	2.01408	-1.67944	0.517941	10.1498	0 .	8 x 45	8 q21	cancer susceptibility 9
TC11002631.hg	525	TC11002631.hg	TRIM44	4.77287	0.530065	2.01225	-1.08405	0.701556	16.5029	0 .	10 x 45	11 p13	tripartite motif containing 44
TC07000452.hg	526	TC07000452.hg	EIF4H	4.03449	0.754791	2.01053	-1.83278	0.605191	12.7435	0 .	17 x 45	7 q11	eukaryotic translation initiation factor 4H
TC05002260.hg	527	TC05002260.hg		5.01379	0.737748	2.009	-1.74327	0.769452	20.1946	0 .	15 x 45
TC06003341.hg	528	TC06003341.hg	SERPINB1	3.84768	0.641996	2.00776	-1.2763	0.648529	14.282	0 .	13 x 44	6 p25	serpin family B member 1
TC13001513.hg	529	TC13001513.hg	NEK3	7.8802	0.755677	2.00743	-2.04284	0.605857	12.7656	0 .	4 x 45	13 q14	NIMA related kinase 3
TC13001379.hg	530	TC13001379.hg		4.02248	0.551071	2.00631	-0.935019	0.628869	13.5583	0 .	9 x 45	13 q12	long intergenic non-protein coding RNA 412
TC03002705.hg	531	TC03002705.hg		5.38632	0.695774	2.00631	-2.06637	0.754217	19.2545	0 .	11 x 45
TC06003417.hg	532	TC06003417.hg		4.93975	0.543748	2.0058	-1.02173	0.785093	21.2481	0 .	11 x 45
TC09001156.hg	533	TC09001156.hg		9.73332	0.930027	2.00266	-3.09857	0.65393	14.4892	0 .	16 x 45
TC13000664.hg	534	TC13000664.hg		4.7666	0.60153	2.00147	-1.22953	0.760059	19.6058	0 .	12 x 45
TC15002106.hg	535	TC15002106.hg		4.71527	0.735014	2.00049	-1.62999	0.806075	22.832	0 .	14 x 45
TC09002363.hg	536	TC09002363.hg		5.64185	0.61861	2.0002	-1.63783	0.695099	16.2078	0 .	14 x 43	1 p36	novel transcript
TC08001498.hg	537	TC08001498.hg		5.0038	0.749111	1.99966	-1.74298	0.735202	18.1814	0 .	14 x 45
TC12002939.hg	538	TC12002939.hg		4.49784	0.616372	1.99812	-1.20732	0.573288	11.7288	0 .	10 x 45
TC01002614.hg	539	TC01002614.hg		5.42248	0.602889	1.99739	-1.30581	0.808689	23.0454	0 .	14 x 45	1 p34	ribosomal protein S15a pseudogene 10
TC15002587.hg	540	TC15002587.hg	RPL4	6.53259	0.590235	1.99682	-1.61641	0.651984	14.4141	0 .	11 x 43	15 q22	ribosomal protein L4
TC08002385.hg	541	TC08002385.hg	UBE2W	4.99167	0.57702	1.9958	-1.83268	0.670455	15.1478	0 .	11 x 45	8 q21	ubiquitin conjugating enzyme E2 W
TC13001043.hg	542	TC13001043.hg	DGKH	6.92192	0.781902	1.99403	-2.50863	0.565749	11.5013	0 .	6 x 45	13 q14	diacylglycerol kinase eta
TC08000660.hg	543	TC08000660.hg		6.80649	0.42123	1.99306	-0.70242	0.543095	10.8423	0 .	8 x 45
TC15000394.hg	544	TC15000394.hg		2.45454	0.671617	1.99251	-1.01882	0.596531	12.4593	0 .	12 x 43	15 q21	GABPB1 antisense RNA 1
TC02003796.hg	545	TC02003796.hg	RPE	4.64538	0.726794	1.99222	-2.0611	0.830434	24.9869	0 .	15 x 45	2 q34	ribulose-5-phosphate-3-epimerase
TC13000354.hg	546	TC13000354.hg		5.25066	0.637333	1.99013	-1.76515	0.724699	17.6299	0 .	13 x 45
TC01003995.hg	547	TC01003995.hg	GNG4	6.75693	0.947812	1.98898	-1.80605	0.183197	3.12381	0.000985914665899035 .	4 x 45	1 q42	G protein subunit gamma 4
TC10002101.hg	548	TC10002101.hg		4.44161	0.537943	1.98886	-0.901158	0.590404	12.2623	0 .	7 x 45
TC01001758.hg	549	TC01001758.hg	TRAF5	7.47186	0.671264	1.98604	-2.70679	0.66099	14.7659	0 .	10 x 45	1 q32	TNF receptor associated factor 5
TC02003797.hg	550	TC02003797.hg		5.1894	0.591252	1.98478	-1.16562	0.750365	19.0287	0 .	16 x 44	2 q34	KANSL1L antisense RNA 1
TC12001964.hg	551	TC12001964.hg	VPS29	6.16045	0.827917	1.98261	-2.51011	0.747179	18.8453	0 .	15 x 45	12 q24	VPS29 retromer complex component
TC13000023.hg	552	TC13000023.hg		5.85014	0.71664	1.9816	-1.71362	0.828961	24.8449	0 .	14 x 45
TC05001250.hg	553	TC05001250.hg		7.02375	0.697238	1.97923	-2.08997	0.647114	14.2284	0 .	15 x 44
TC22001076.hg	554	TC22001076.hg	SLC5A1	7.15827	0.583073	1.97892	-1.62941	0.251375	4.3536	9.38806605077502e-06 .	3 x 45	22 q12	solute carrier family 5 member 1
TC06003064.hg	555	TC06003064.hg	TBPL1	4.5449	0.616654	1.97839	-1.19378	0.421922	7.80107	6.06181771445335e-14 .	6 x 45	6 q23	TATA-box binding protein like 1
TC03002273.hg	556	TC03002273.hg		5.09165	0.761025	1.97502	-1.60154	0.8264	24.602	0 .	13 x 45
TC08001681.hg	557	TC08001681.hg		5.19838	0.642161	1.97244	-1.38065	0.81784	23.8241	0 .	13 x 45
TC01004435.hg	558	TC01004435.hg		4.78592	0.635145	1.9723	-0.995263	0.711114	16.9547	0 .	13 x 45
TC13000572.hg	559	TC13000572.hg		5.54001	0.806736	1.97046	-2.5336	0.911825	37.2279	0 .	14 x 45
TC01005443.hg	560	TC01005443.hg		4.76635	0.606638	1.97013	-1.30622	0.769244	20.1812	0 .	14 x 45
TC13001090.hg	561	TC13001090.hg		6.45552	0.763631	1.96828	-1.88391	0.596755	12.4665	0 .	5 x 45	13 q14	deleted in lymphocytic leukemia 1
TC06002631.hg	562	TC06002631.hg		4.60596	0.605138	1.96716	-1.49337	0.739381	18.4086	0 .	12 x 45
TC03000403.hg	563	TC03000403.hg		6.63385	0.728829	1.96691	-2.15306	0.80617	22.8397	0 .	16 x 45
TC07000894.hg	564	TC07000894.hg	TAS2R4	4.76123	0.600702	1.96644	-1.05294	0.754912	19.2957	0 .	11 x 45	7 q34	taste 2 receptor member 4
TC16001000.hg	565	TC16001000.hg		7.20608	0.764376	1.96585	-1.57514	0.779536	20.8625	0 .	15 x 45
TC16001006.hg	566	TC16001006.hg		7.20608	0.764376	1.96585	-1.57514	0.779536	20.8625	0 .	15 x 45
TC16001026.hg	567	TC16001026.hg		7.20608	0.764376	1.96585	-1.57514	0.779536	20.8625	0 .	15 x 45
TC01006390.hg	568	TC01006390.hg	HNRNPU	7.7329	0.842703	1.96479	-2.62174	0.788846	21.5159	0 .	16 x 45	1 q44	heterogeneous nuclear ribonucleoprotein U
TC01004563.hg	569	TC01004563.hg	SLC35A3	5.20614	0.695596	1.96433	-1.8284	0.674907	15.332	0 .	6 x 45	1 p21	solute carrier family 35 member A3
TC06002546.hg	570	TC06002546.hg		4.79554	0.726638	1.96335	-1.73193	0.778711	20.8064	0 .	14 x 45
TC16000247.hg	571	TC16000247.hg		6.87597	0.75306	1.96181	-1.58658	0.766839	20.0277	0 .	15 x 45
TC16000937.hg	572	TC16000937.hg		6.87597	0.75306	1.96181	-1.58658	0.766839	20.0277	0 .	15 x 45
TC16000943.hg	573	TC16000943.hg		6.87597	0.75306	1.96181	-1.58658	0.766839	20.0277	0 .	15 x 45
TC06002011.hg	574	TC06002011.hg		5.0138	0.563712	1.95394	-1.36605	0.748593	18.9263	0 .	16 x 43	6 q21	RNA, U6 small nuclear 957, pseudogene
TC07000885.hg	575	TC07000885.hg	NDUFB2	4.59646	0.633458	1.95364	-1.53163	0.774866	20.5483	0 .	13 x 45	7 q34	NADH:ubiquinone oxidoreductase subunit B2
TC06000672.hg	576	TC06000672.hg	TINAG	4.64659	0.649384	1.95331	-1.09302	0.282213	4.9312	7.00102885664577e-07 .	4 x 44	6 p12	tubulointerstitial nephritis antigen
TC06001379.hg	577	TC06001379.hg		6.68703	0.704182	1.95283	-2.13365	0.635386	13.7931	0 .	15 x 44
TC06001839.hg	578	TC06001839.hg		6.68703	0.704182	1.95283	-2.13365	0.635386	13.7931	0 .	15 x 44
TC04001188.hg	579	TC04001188.hg		8.57844	1.0006	1.95018	-3.98414	0.631323	13.6462	0 .	16 x 45
TC04001190.hg	580	TC04001190.hg		8.57844	1.0006	1.95018	-3.98414	0.631323	13.6462	0 .	16 x 45
TC01004808.hg	581	TC01004808.hg		5.04895	0.527937	1.94937	-0.906935	0.697581	16.3203	0 .	10 x 45
TC02003265.hg	582	TC02003265.hg		7.21415	0.675845	1.94839	-1.74903	0.797522	22.16	0 .	15 x 45	2 p15	activator of HSP90 ATPase homolog 2, pseudogene
TC07000939.hg	583	TC07000939.hg	CTAGE15	5.38307	0.57648	1.9472	-1.27609	0.521048	10.2332	0 .	7 x 45	7 q35	CTAGE family member 15
TC21000888.hg	584	TC21000888.hg		6.42078	0.770788	1.94622	-1.97145	0.674205	15.3027	0 .	13 x 45
TC12002540.hg	585	TC12002540.hg		4.02814	0.524109	1.94423	-0.971294	0.697979	16.3385	0 .	10 x 44	12 q23	HELLP associated long non-coding RNA
TC08002101.hg	586	TC08002101.hg		5.86643	0.598162	1.94413	-1.14325	0.605381	12.7498	0 .	12 x 43
TC15000190.hg	587	TC15000190.hg		5.62321	0.615072	1.94339	-1.42534	0.632068	13.673	0 .	12 x 44
TC01003147.hg	588	TC01003147.hg		6.42193	0.788038	1.94113	-1.84382	0.762359	19.7472	0 .	15 x 45
TC11001531.hg	589	TC11001531.hg		6.64714	0.668166	1.94012	-1.61247	0.589702	12.2399	0 .	6 x 45	13 q14	TPT1 antisense RNA 1
TC06003120.hg	590	TC06003120.hg		4.81362	0.699691	1.93291	-1.26283	0.540521	10.7696	0 .	11 x 45	6 q24	novel transcript
TC19002056.hg	591	TC19002056.hg		4.52218	0.645728	1.93278	-0.734533	0.43768	8.15994	5.6621374255883e-15 .	6 x 45
TC01005444.hg	592	TC01005444.hg		5.86679	0.542625	1.93099	-1.28278	0.801648	22.4794	0 .	14 x 44	1 p34	ribosomal protein S15a pseudogene 10
TC07000196.hg	593	TC07000196.hg		7.1212	0.611455	1.9283	-2.16743	0.714841	17.1359	0 .	8 x 45	7 p14	proteasome (prosome, macropain) 26S subunit, ATPase, 5 (PSMC5) pseudogene
TC13000077.hg	594	TC13000077.hg	GTF3A	8.94615	0.715001	1.92464	-1.59885	0.326606	5.79257	9.27261911698452e-09 .	5 x 45	13 q12	general transcription factor IIIA
TC13000614.hg	595	TC13000614.hg	CCDC122	5.11631	0.56695	1.92316	-1.25658	0.606783	12.7965	0 .	6 x 45	13 q14	coiled-coil domain containing 122
TC10002708.hg	596	TC10002708.hg		6.86004	0.667892	1.92129	-1.61918	0.724705	17.6302	0 .	10 x 45	10 q22	TEC
TC06003303.hg	597	TC06003303.hg		4.49274	0.776666	1.91976	-1.48452	0.774561	20.5281	0 .	13 x 45
TC21000342.hg	598	TC21000342.hg		6.15804	0.761114	1.91873	-1.96577	0.674952	15.3338	0 .	13 x 45
TC02002468.hg	599	TC02002468.hg	PLA2R1	6.72162	0.633126	1.91852	-1.87025	0.491375	9.45745	0 .	9 x 45	2 q24	phospholipase A2 receptor 1
TC07002714.hg	600	TC07002714.hg		5.03888	0.798023	1.91817	-2.09979	0.874079	30.1621	0 .	14 x 45
TC11000340.hg	601	TC11000340.hg	TRIM44	4.70779	0.518125	1.91807	-1.21206	0.691627	16.0522	0 .	10 x 45	11 p13	tripartite motif containing 44
TC07002231.hg	602	TC07002231.hg		7.23566	0.60206	1.91712	-1.97364	0.724665	17.6282	0 .	8 x 45	7 p14	proteasome (prosome, macropain) 26S subunit, ATPase, 5 (PSMC5) pseudogene
TC13001067.hg	603	TC13001067.hg		4.18161	0.554211	1.91412	-1.33928	0.698567	16.3653	0 .	12 x 44	13 q14	novel transcript
TC16001876.hg	604	TC16001876.hg		4.27603	0.567974	1.91372	-1.41226	0.677923	15.4585	0 .	16 x 43
TC13001706.hg	605	TC13001706.hg		6.40268	0.718706	1.91242	-1.65375	0.239647	4.1378	2.31899367202359e-05 .	4 x 45	13 q34	MCF2L antisense RNA 1
TC12003134.hg	606	TC12003134.hg	SBNO1	7.53216	0.510673	1.91087	-1.53801	0.411267	7.56333	2.80886425230165e-13 .	5 x 45	12 q24	strawberry notch homolog 1
TC07001921.hg	607	TC07001921.hg		5.14164	0.48941	1.9052	-1.41303	0.641698	14.0253	0 .	9 x 43
TC06002338.hg	608	TC06002338.hg	TCTE3	5.06945	0.649721	1.90116	-1.74666	0.799112	22.282	0 .	11 x 45	6 q27	t-complex-associated-testis-expressed 3
TC07000434.hg	609	TC07000434.hg	POLR2J3	9.02552	0.652776	1.90104	-1.93225	0.679039	15.5057	0 .	13 x 43	7 q11	PMS1 homolog 2, mismatch repair system component pseudogene 10
TC07001523.hg	610	TC07001523.hg	POLR2J3	9.02552	0.652776	1.90104	-1.93225	0.679039	15.5057	0 .	13 x 43	7 q11	PMS1 homolog 2, mismatch repair system component pseudogene 10
TC12002763.hg	611	TC12002763.hg		4.83955	0.604901	1.89947	-1.36414	0.752857	19.1742	0 .	15 x 45	CHR_HSCHR12_2_CTG2 p13	taste receptor, type 2, member 18 pseudogene
TC06000634.hg	612	TC06000634.hg		3.7902	0.577569	1.89942	-1.36618	0.712752	17.034	0 .	12 x 44	6 p12
TC05003288.hg	613	TC05003288.hg		4.57376	0.61461	1.89876	-1.33537	0.646397	14.2013	0 .	12 x 43
TC08002084.hg	614	TC08002084.hg		5.64343	0.439003	1.89861	-1.02472	0.711038	16.951	0 .	10 x 44
TC15001580.hg	615	TC15001580.hg	RPL4	4.61488	0.601684	1.898	-1.57268	0.620441	13.2617	0 .	12 x 43	15 q22	ribosomal protein L4
TC0X001627.hg	616	TC0X001627.hg	PDK3	7.63085	0.624266	1.89658	-1.89989	0.308478	5.43614	5.91353096490721e-08 .	5 x 45	X p22	pyruvate dehydrogenase kinase 3
TC21000001.hg	617	TC21000001.hg		4.67664	0.69204	1.89519	-1.88133	0.65768	14.6353	0 .	16 x 45
TC05001751.hg	618	TC05001751.hg		4.75004	0.596402	1.89297	-1.26109	0.724831	17.6367	0 .	13 x 44	5 q23	long intergenic non-protein coding RNA 1184
TC01003534.hg	619	TC01003534.hg	GAS5	6.21153	0.635325	1.89244	-1.6161	0.619958	13.2449	0 .	11 x 44	1 q25	growth arrest specific 5
TC14000004.hg	620	TC14000004.hg		8.43476	0.897276	1.89189	-2.72299	0.642455	14.0535	0 .	16 x 45
TC02003950.hg	621	TC02003950.hg	SH3YL1	5.48887	0.570555	1.89171	-1.46787	0.71327	17.0592	0 .	10 x 44	2 p25	SH3 and SYLF domain containing 1
TC7_gl000195_random000001.hg	622	TC7_gl000195_random000001.hg	LINC01670	6.85084	0.63722	1.89073	-1.60375	0.540284	10.7629	0 .	9 x 43	21 p12	novel transcript
TC13000727.hg	623	TC13000727.hg	DIS3	7.85324	0.503381	1.88884	-1.33688	0.514967	10.0704	0 .	6 x 45	13 q21	DIS3 homolog, exosome endoribonuclease and 3'-5' exoribonuclease
TC03002195.hg	624	TC03002195.hg	TRNT1	4.81418	0.687933	1.88697	-1.59798	0.728689	17.8362	0 .	11 x 45	3 p26	tRNA nucleotidyl transferase 1
TC16000936.hg	625	TC16000936.hg	NPIPB5	8.99196	0.869755	1.88616	-2.0569	0.828577	24.8082	0 .	15 x 45	16 p12	nuclear pore complex interacting protein family member B5
TC20000448.hg	626	TC20000448.hg	RAE1	7.26612	0.547	1.88284	-1.14529	0.38532	6.99963	9.43911615536308e-12 .	4 x 45	20 q13	ribonucleic acid export 1
TC13001087.hg	627	TC13001087.hg		4.88761	0.576679	1.88269	-1.00343	0.756934	19.4165	0 .	9 x 45
TC13000686.hg	628	TC13000686.hg	NEK3	7.59979	0.666053	1.88135	-1.64837	0.61288	13.0018	0 .	4 x 45	13 q14	NIMA related kinase 3
TC08000576.hg	629	TC08000576.hg		4.6927	0.780066	1.8805	-1.6794	0.767756	20.086	0 .	11 x 45	8 q22	ribosomal protein S15a (RPS15A) pseudogene
TC04002891.hg	630	TC04002891.hg		5.9581	0.585204	1.87774	-1.7323	0.613797	13.033	0 .	12 x 43
TC13000303.hg	631	TC13000303.hg	NDFIP2	8.00382	0.621332	1.87697	-1.95482	0.450987	8.47021	6.66133814775094e-16 .	3 x 45	13 q31	Nedd4 family interacting protein 2
TC06001131.hg	632	TC06001131.hg	TULP4	7.966	0.593314	1.87645	-1.67361	0.515809	10.0928	0 .	6 x 45	6 q25	TUB like protein 4
TC13001443.hg	633	TC13001443.hg		5.66192	0.543108	1.8755	-1.0582	0.806924	22.9008	0 .	9 x 45
TC07000964.hg	634	TC07000964.hg		9.21903	0.670556	1.87451	-3.71233	0.809407	23.1046	0 .	16 x 45
TC01005808.hg	635	TC01005808.hg		6.01295	0.635239	1.87428	-1.8418	0.701933	16.5204	0 .	9 x 45	1 q21	H2B clustered histone 20, pseudogene
TC0X002065.hg	636	TC0X002065.hg	SHROOM4	5.50392	0.574521	1.8727	-1.48077	0.442989	8.2829	2.44249065417534e-15 .	6 x 45	X p11	shroom family member 4
TC10000632.hg	637	TC10000632.hg		5.22119	0.720899	1.87263	-1.65994	0.748056	18.8955	0 .	13 x 45
TC17000761.hg	638	TC17000761.hg		6.27894	0.883815	1.8726	-3.48051	0.790138	21.6095	0 .	16 x 45
TC09000470.hg	639	TC09000470.hg		3.91847	0.607571	1.87187	-1.22681	0.700113	16.4363	0 .	14 x 44	9 q22	novel transcript
TC07000953.hg	640	TC07000953.hg	CTAGE4	6.55655	0.705834	1.87117	-2.05419	0.447075	8.37828	1.33226762955019e-15 .	4 x 45	7 q35	CTAGE family member 4
TC07001620.hg	641	TC07001620.hg		4.216	0.606825	1.87016	-1.18006	0.717668	17.2754	0 .	14 x 44	7 q21	microRNA 591
TC09002658.hg	642	TC09002658.hg		5.01048	0.602104	1.86202	-1.49033	0.79315	21.8309	0 .	13 x 45
TC0X001836.hg	643	TC0X001836.hg		4.89405	0.668164	1.86162	-1.33999	0.630988	13.6342	0 .	15 x 43
TC01002775.hg	644	TC01002775.hg	ZRANB2	7.34675	0.447248	1.86156	-1.28912	0.712541	17.0237	0 .	10 x 44	1 p31	zinc finger RANBP2-type containing 2
TC05000067.hg	645	TC05000067.hg		7.66023	0.793885	1.86127	-2.46991	0.445108	8.33228	1.77635683940025e-15 .	3 x 45	5 p15	small nucleolar RNA, C/D box 123
TC06002107.hg	646	TC06002107.hg		4.28373	0.61249	1.86075	-1.26926	0.588822	12.212	0 .	13 x 43
TC0M000002.hg	647	TC0M000002.hg	MTRNR2L8	11.3037	0.835652	1.86001	-2.61472	0.549067	11.0125	0 .	11 x 44	MT p15	mitochondrially encoded tRNA-Phe (UUU/C)
TC11001412.hg	648	TC11001412.hg	MTRNR2L8	11.3037	0.835652	1.86001	-2.61472	0.549067	11.0125	0 .	11 x 44	MT p15	mitochondrially encoded tRNA-Phe (UUU/C)
TC7_gl000195_random000005.hg	649	TC7_gl000195_random000005.hg		7.09521	0.590657	1.85956	-1.2812	0.600386	12.5849	0 .	9 x 43
TC20000457.hg	650	TC20000457.hg	RAB22A	9.19553	0.528224	1.85945	-1.51836	0.413552	7.61399	2.03059791203941e-13 .	5 x 45	20 q13	RAB22A, member RAS oncogene family
TC13001449.hg	651	TC13001449.hg		3.81503	0.554308	1.85903	-1.14385	0.706405	16.7298	0 .	11 x 45
TC05001528.hg	652	TC05001528.hg		4.50902	0.613798	1.85685	-1.49097	0.687514	15.8707	0 .	14 x 44
TC07002880.hg	653	TC07002880.hg		4.94947	0.595191	1.85669	-1.20819	0.733402	18.0849	0 .	12 x 45	7 p14	ribosomal protein S29 pseudogene 14
TC06003622.hg	654	TC06003622.hg	STK38	8.20483	0.606675	1.85308	-1.47868	0.471915	8.97271	0 .	5 x 45	6 p21	serine/threonine kinase 38
TC09002392.hg	655	TC09002392.hg		3.94349	0.640469	1.85053	-1.41775	0.774627	20.5324	0 .	14 x 45
TC05003299.hg	656	TC05003299.hg	CSNK1A1	6.87415	0.727441	1.85011	-1.81089	0.708835	16.8453	0 .	17 x 45	5 q32	novel transcript
TC19001630.hg	657	TC19001630.hg		6.7292	0.63855	1.84633	-1.78485	0.645784	14.1782	0 .	10 x 43	19 q13	TEC
TC07001565.hg	658	TC07001565.hg	PCLO	5.04031	0.598167	1.84483	-0.884973	0.277892	4.84933	1.02704783078167e-06 .	5 x 44	7 q21	piccolo presynaptic cytomatrix protein
TC07003171.hg	659	TC07003171.hg		6.92835	0.750799	1.84348	-1.78564	0.69908	16.3888	0 .	13 x 45	7 q32	novel transcript
TC16000152.hg	660	TC16000152.hg		7.2507	0.849219	1.84298	-3.29587	0.82589	24.5542	0 .	16 x 45	11 q13	mitochondrially encoded cytochrome c oxidase I (MT-COI) pseudogene
TC19002038.hg	661	TC19002038.hg		4.56155	0.434552	1.84286	-0.918597	0.750209	19.0196	0 .	9 x 45
TC13001066.hg	662	TC13001066.hg		7.09573	0.486782	1.84219	-1.10813	0.691497	16.0464	0 .	8 x 45	13 q14	TPT1 antisense RNA 1
TC12000124.hg	663	TC12000124.hg		5.32977	0.644961	1.83978	-1.64036	0.817848	23.8249	0 .	11 x 45	12 p13	ribosomal protein S24 (RPS24) pseudogene
TC12003109.hg	664	TC12003109.hg	TESC	7.81664	0.828405	1.83932	-1.91546	0.2181	3.74621	0.000108915609786098 .	4 x 45	12 q24	tescalcin
TC07002421.hg	665	TC07002421.hg		6.93892	0.678707	1.83791	-1.58891	0.704256	16.6287	0 .	16 x 45
TC07003061.hg	666	TC07003061.hg	CDK6	8.79676	0.692095	1.83765	-1.99137	0.30951	5.45626	5.33872830388304e-08 .	4 x 45	7 q21	cyclin dependent kinase 6
TC06003154.hg	667	TC06003154.hg	TULP4	7.93205	0.571125	1.83659	-1.53563	0.517402	10.1353	0 .	6 x 45	6 q25	TUB like protein 4
TC12001238.hg	668	TC12001238.hg	TAS2R19	3.94642	0.673915	1.83557	-1.33024	0.714393	17.114	0 .	15 x 45	CHR_HSCHR12_2_CTG2 p13	taste 2 receptor member 19
TC06002160.hg	669	TC06002160.hg		2.67197	0.588856	1.83066	-1.02695	0.722918	17.5391	0 .	11 x 45	6 q24	microRNA 3145
TC07000380.hg	670	TC07000380.hg	ZNF736	4.96416	0.715266	1.83027	-1.64952	0.610524	12.9221	0 .	7 x 45	7 q11	zinc finger protein 736
TC06003310.hg	671	TC06003310.hg		3.6379	0.609831	1.82686	-1.18134	0.736203	18.2354	0 .	12 x 45
TC08002550.hg	672	TC08002550.hg		5.3117	0.615301	1.82546	-1.39527	0.806846	22.8945	0 .	13 x 45
TC03001204.hg	673	TC03001204.hg		4.28443	0.582856	1.82451	-1.16593	0.711281	16.9627	0 .	16 x 43
TC02004640.hg	674	TC02004640.hg		5.30545	0.693625	1.82437	-1.50164	0.795697	22.0215	0 .	16 x 45
TC22000931.hg	675	TC22000931.hg		4.52057	0.560623	1.82406	-1.02426	0.777722	20.7394	0 .	12 x 45	22 q11	novel transcript
TC07000819.hg	676	TC07000819.hg		5.57146	0.576338	1.82341	-1.5175	0.848788	26.9101	0 .	14 x 45
TC6_mcf_hap5000084.hg	677	TC6_mcf_hap5000084.hg	BRD2	2.50868	0.609124	1.8232	-1.18386	0.655608	14.5543	0 .	13 x 43	CHR_HSCHR6_MHC_DBB_CTG1 p21	bromodomain containing 2
TC07003292.hg	678	TC07003292.hg	LSMEM1	4.7358	0.503913	1.81907	-0.911347	0.696768	16.2833	0 .	11 x 44	7 q31	leucine rich single-pass membrane protein 1
TC20000241.hg	679	TC20000241.hg		5.91553	0.791667	1.81784	-1.75746	0.784745	21.2235	0 .	15 x 45	20 q11	microRNA 644a
TC07001980.hg	680	TC07001980.hg	CTAGE4	6.54853	0.696806	1.81646	-1.97573	0.53713	10.6745	0 .	5 x 45	7 q35	CTAGE family member 4
TC01005520.hg	681	TC01005520.hg	MYSM1	4.52962	0.505242	1.81626	-1.08964	0.756467	19.3885	0 .	10 x 45	1 p32	Myb like, SWIRM and MPN domains 1
TC18000839.hg	682	TC18000839.hg		8.4945	0.648507	1.81483	-1.80132	0.835034	25.4412	0 .	15 x 45	18 p11	nuclear pore complex interacting protein family member B1, pseudogene
TC0X001730.hg	683	TC0X001730.hg		4.9779	0.613588	1.81474	-1.67284	0.762365	19.7475	0 .	12 x 44	X p11	novel transcript
TC07001836.hg	684	TC07001836.hg		4.57925	0.612236	1.81382	-1.58063	0.723968	17.5925	0 .	15 x 43	7 q31	TEC
TC07002386.hg	685	TC07002386.hg		5.45063	0.558261	1.81379	-1.76838	0.657281	14.6196	0 .	10 x 45
TC12002976.hg	686	TC12002976.hg		4.6319	0.553606	1.81004	-1.52128	0.781283	20.9823	0 .	11 x 45
TC02002600.hg	687	TC02002600.hg		4.58813	0.600408	1.80883	-1.20555	0.796424	22.0765	0 .	11 x 45	2 q32	long intergenic non-protein coding RNA 1473
TC06003121.hg	688	TC06003121.hg		3.92117	0.570476	1.80839	-0.817584	0.625993	13.4562	0 .	11 x 45
TC09001178.hg	689	TC09001178.hg	CBWD5	5.74225	0.566539	1.80813	-1.89248	0.791426	21.7037	0 .	10 x 45	9 q21	COBW domain containing 4, pseudogene
TC0X001959.hg	690	TC0X001959.hg		7.20442	0.540783	1.80778	-1.63471	0.38113	6.9105	1.61872737436397e-11 .	7 x 44	X p22	novel transcript
TC19002523.hg	691	TC19002523.hg		6.96878	0.629795	1.8076	-1.45781	0.647309	14.2358	0 .	11 x 43	19 q13	TEC
TC13001569.hg	692	TC13001569.hg	DIS3	8.46023	0.486007	1.80538	-1.27581	0.468101	8.87974	0 .	6 x 45	13 q21	DIS3 homolog, exosome endoribonuclease and 3'-5' exoribonuclease
TC16001803.hg	693	TC16001803.hg		9.76686	0.633158	1.80362	-1.4983	0.683342	15.6895	0 .	15 x 44	16 p12	SMG1 pseudogene 1
TC06003139.hg	694	TC06003139.hg		5.06017	0.564438	1.80274	-1.1077	0.777217	20.7054	0 .	15 x 43
TC01003983.hg	695	TC01003983.hg	TARBP1	6.53783	0.572038	1.80262	-1.7733	0.773004	20.4254	0 .	10 x 44	1 q42	TAR (HIV-1) RNA binding protein 1
TC16001801.hg	696	TC16001801.hg		9.47661	0.828698	1.80191	-2.17272	0.824081	24.3862	0 .	15 x 45
TC03002562.hg	697	TC03002562.hg		5.12562	0.524276	1.80009	-1.19772	0.570452	11.6427	0 .	8 x 44	3 q23	novel transcript, antisense to RBP2, RBP1 & NMNAT3
TC20001537.hg	698	TC20001537.hg	PLAGL2	8.52295	0.73437	1.79979	-2.08554	0.327272	5.80579	8.64235227826526e-09 .	3 x 45	20 q11	PLAG1 like zinc finger 2
TC02004354.hg	699	TC02004354.hg		4.87168	0.654288	1.79976	-0.970324	0.471097	8.95271	0 .	8 x 45
TC03002466.hg	700	TC03002466.hg		5.165	0.68873	1.79832	-1.58418	0.62116	13.2867	0 .	11 x 45	3 q13	TGF-beta induced lncRNA
TC02003331.hg	701	TC02003331.hg		3.69956	0.547833	1.79801	-1.23981	0.699036	16.3868	0 .	12 x 43
TC08002541.hg	702	TC08002541.hg		5.1827	0.599671	1.79777	-1.16579	0.728284	17.8151	0 .	12 x 45
TC02004743.hg	703	TC02004743.hg		5.03435	0.602322	1.79765	-1.43462	0.78873	21.5075	0 .	11 x 45	2 q32	novel transcript
TC12000922.hg	704	TC12000922.hg		5.12317	0.54137	1.79493	-1.3573	0.869177	29.4641	0 .	16 x 44
TC11001507.hg	705	TC11001507.hg		5.45143	0.628132	1.79473	-1.14595	0.371041	6.6979	5.7498006356127e-11 .	6 x 44	11 p14	BBOX1 antisense RNA 1
TC13000151.hg	706	TC13000151.hg	DGKH	6.39313	0.748208	1.79282	-2.04253	0.561571	11.377	0 .	6 x 45	13 q14	diacylglycerol kinase eta
TC02004742.hg	707	TC02004742.hg		4.74716	0.555262	1.79138	-1.1922	0.860678	28.3367	0 .	11 x 45
TC01000703.hg	708	TC01000703.hg	PATJ	7.78269	0.656564	1.79009	-2.4201	0.671498	15.1907	0 .	3 x 45	1 p31	PATJ crumbs cell polarity complex component
TC07002591.hg	709	TC07002591.hg		4.70211	0.692034	1.78858	-1.89186	0.807982	22.9872	0 .	14 x 45
TC07002918.hg	710	TC07002918.hg		5.79189	0.669641	1.78829	-2.47516	0.71078	16.9386	0 .	8 x 45
TC17001364.hg	711	TC17001364.hg		3.61244	0.585441	1.78686	-1.0349	0.669522	15.1095	0 .	14 x 43
TC04002747.hg	712	TC04002747.hg		5.48362	0.508671	1.78664	-1.2204	0.785384	21.2686	0 .	12 x 43	4 q31	novel transcript, antisense to RAB33B
TC16000942.hg	713	TC16000942.hg	NPIPB5	9.36752	0.825423	1.78591	-2.22532	0.818929	23.9203	0 .	16 x 45	16 p12	nuclear pore complex interacting protein family member B5
TC07003176.hg	714	TC07003176.hg		4.55207	0.600401	1.78451	-1.27357	0.762835	19.7766	0 .	13 x 45
TC02003321.hg	715	TC02003321.hg	ZNF638	6.19531	0.671293	1.78403	-1.49398	0.820871	24.0938	0 .	16 x 45	2 p13	novel transcript
TC05001184.hg	716	TC05001184.hg	MYO10	8.3698	0.504187	1.78255	-1.56872	0.445703	8.34619	1.55431223447522e-15 .	4 x 45	5 p15	myosin X
TC13001721.hg	717	TC13001721.hg	ERCC5	7.74349	0.42507	1.78254	-1.07771	0.544961	10.8952	0 .	7 x 45	13 q33	BIVM-ERCC5 readthrough
TC02004670.hg	718	TC02004670.hg		3.9921	0.644968	1.77996	-1.23948	0.671184	15.1777	0 .	15 x 43
TC08001688.hg	719	TC08001688.hg		5.01513	0.5467	1.77944	-1.04501	0.701772	16.5129	0 .	11 x 44	8 q24	TEC
TC0X001241.hg	720	TC0X001241.hg		3.77545	0.548918	1.7783	-1.1348	0.706075	16.7142	0 .	10 x 45	X q22	TCEAL3 antisense RNA 1
TC04002024.hg	721	TC04002024.hg	TMEM165	6.07891	0.792868	1.77821	-1.61253	0.695098	16.2077	0 .	16 x 45	4 q12	transmembrane protein 165
TC16001808.hg	722	TC16001808.hg	NPIPB5	9.49046	0.820177	1.77812	-2.18119	0.822589	24.2494	0 .	15 x 45	16 p12	nuclear pore complex interacting protein family member B5
TC02002439.hg	723	TC02002439.hg		5.4006	0.733377	1.777	-2.10114	0.863865	28.748	0 .	16 x 45
TC13000759.hg	724	TC13000759.hg		6.13968	0.692957	1.7768	-1.61452	0.777614	20.7322	0 .	13 x 45	13 q31	RNA, 5S ribosomal pseudogene 33
TC07001265.hg	725	TC07001265.hg		4.71634	0.585836	1.77542	-1.528	0.727513	17.775	0 .	12 x 45	7 p14	ribosomal protein S29 pseudogene 14
TC11003187.hg	726	TC11003187.hg	SNHG1	6.96937	0.682821	1.77499	-1.59792	0.642294	14.0475	0 .	10 x 43	11 q12	small nucleolar RNA host gene 1
TC09002745.hg	727	TC09002745.hg		5.70805	0.55393	1.77474	-1.28845	0.81348	23.4466	0 .	9 x 45
TC02001620.hg	728	TC02001620.hg	PUM2	5.68121	0.649965	1.77453	-1.93756	0.787729	21.4355	0 .	17 x 45	2 p24	pumilio RNA binding family member 2
TC13001352.hg	729	TC13001352.hg	ZDHHC20	8.31291	0.718523	1.77396	-1.91343	0.242412	4.18849	1.88132993759194e-05 .	3 x 45	13 q12	zinc finger DHHC-type containing 20
TC17002705.hg	730	TC17002705.hg		4.51335	0.571747	1.77304	-1.35082	0.807516	22.9491	0 .	13 x 45	17 q21	novel transcript, sense intronic to MBTD1
TC15000141.hg	731	TC15000141.hg	HERC2	8.61474	0.589632	1.77228	-1.53967	0.717938	17.2888	0 .	13 x 44	15 q11	hect domain and RLD 2 pseudogene 3
TC14001221.hg	732	TC14001221.hg		4.94472	0.635578	1.77196	-1.61458	0.798942	22.2689	0 .	16 x 45
TC13000173.hg	733	TC13000173.hg		7.92729	0.467104	1.77128	-1.1313	0.678697	15.4912	0 .	8 x 45	13 q14	TPT1 antisense RNA 1
TC13000285.hg	734	TC13000285.hg	UCHL3	8.68666	0.671638	1.77036	-2.19722	0.410817	7.55337	2.99316127438942e-13 .	4 x 45	13 q22	novel transcript
TC03003292.hg	735	TC03003292.hg		7.2629	0.643594	1.7697	-1.68325	0.875379	30.3536	0 .	12 x 45
TC07002716.hg	736	TC07002716.hg	DNAJB6	5.72937	0.763542	1.76823	-1.75542	0.771476	20.3256	0 .	14 x 45	7 q36	DnaJ heat shock protein family (Hsp40) member B6
TC05001833.hg	737	TC05001833.hg	HSPA9	4.27922	0.584563	1.76769	-1.38886	0.700834	16.4695	0 .	14 x 43	5 q31	heat shock protein family A (Hsp70) member 9
TC12001234.hg	738	TC12001234.hg	TAS2R13	4.15113	0.659529	1.76673	-1.36697	0.737608	18.3117	0 .	15 x 45	CHR_HSCHR12_2_CTG2 p13	taste 2 receptor member 13
TC10001400.hg	739	TC10001400.hg		5.72909	0.471043	1.76616	-1.36733	0.734581	18.1481	0 .	11 x 43	10 q22	novel transcript to NUDT13
TC0Y000158.hg	740	TC0Y000158.hg		6.56938	0.708197	1.76601	-2.36347	0.577838	11.8683	0 .	16 x 45
TC19001370.hg	741	TC19001370.hg	ZNF681	5.44071	0.518288	1.76435	-1.25022	0.487556	9.36091	0 .	6 x 45	19 p12	zinc finger protein 681
TC05003449.hg	742	TC05003449.hg		6.62326	0.491676	1.76416	-1.27188	0.793055	21.8239	0 .	16 x 43
TC13001486.hg	743	TC13001486.hg	MED4	8.27075	0.479188	1.76411	-1.32443	0.601311	12.6153	0 .	6 x 45	13 q14	mediator complex subunit 4
TC13000493.hg	744	TC13000493.hg	CENPJ	6.46564	0.537307	1.76391	-1.0718	0.636364	13.8288	0 .	6 x 45	13 q12	centromere protein J
TC13001263.hg	745	TC13001263.hg	BIVM	5.51847	0.586188	1.76279	-1.5376	0.441074	8.23844	3.33066907387547e-15 .	6 x 45	13 q33	basic, immunoglobulin-like variable motif containing
TC05002262.hg	746	TC05002262.hg		5.62219	0.558142	1.76159	-1.16786	0.716137	17.1996	0 .	15 x 43
TC04000864.hg	747	TC04000864.hg		6.58642	0.580552	1.76052	-1.83122	0.779014	20.827	0 .	16 x 44
TC16000570.hg	748	TC16000570.hg	NFAT5	8.85672	0.499482	1.76039	-1.83311	0.462355	8.74087	1.11022302462516e-16 .	6 x 44	16 q22	nuclear factor of activated T cells 5
TC01003076.hg	749	TC01003076.hg		7.1021	0.861872	1.7597	-3.09014	0.643568	14.095	0 .	16 x 45
TC05001301.hg	750	TC05001301.hg	RPL37	4.55097	0.674357	1.75904	-1.92767	0.54579	10.9188	0 .	7 x 44	5 p13	ribosomal protein L37
TC03003291.hg	751	TC03003291.hg		5.47125	0.609907	1.75515	-1.52116	0.78413	21.1803	0 .	10 x 45
TC02000961.hg	752	TC02000961.hg	PKP4	3.71199	0.548284	1.75414	-1.38825	0.720718	17.4278	0 .	12 x 44	2 q24	plakophilin 4
TC08000752.hg	753	TC08000752.hg		5.11724	0.680394	1.75385	-1.90146	0.662659	14.8322	0 .	12 x 45	8 q24	microRNA 1205
TC20001070.hg	754	TC20001070.hg	PANK2	6.47892	0.644313	1.75327	-1.62301	0.654344	14.5052	0 .	14 x 43	20 p13	pantothenate kinase 2
TC03002108.hg	755	TC03002108.hg	CLDN1	8.8644	0.822459	1.75246	-3.31926	0.0329245	0.552214	0.290620247709808 .	3 x 45	3 q28	claudin 1
TC02002446.hg	756	TC02002446.hg		6.09844	0.537154	1.75201	-1.21018	0.763235	19.8015	0 .	10 x 45
TC04001445.hg	757	TC04001445.hg		4.4384	0.435864	1.75146	-0.91026	0.595031	12.4107	0 .	7 x 45	4 q24	novel transcript
TC17002324.hg	758	TC17002324.hg		5.00608	0.755687	1.75085	-1.52741	0.762753	19.7716	0 .	15 x 45
TC01004534.hg	759	TC01004534.hg		7.09744	0.677787	1.75058	-1.95848	0.380757	6.90259	1.69766423141482e-11 .	3 x 45	1 p22	BCAR3 antisense RNA 1
TC04000285.hg	760	TC04000285.hg		9.42541	0.930496	1.74922	-3.95617	0.642991	14.0735	0 .	16 x 45
TC07001868.hg	761	TC07001868.hg		6.48632	0.705154	1.74874	-1.70253	0.696083	16.2522	0 .	13 x 45	7 q32	novel transcript
TC13000128.hg	762	TC13000128.hg	EXOSC8	6.75613	0.559225	1.74802	-1.3643	0.474649	9.03976	0 .	5 x 45	13 q13	exosome component 8
TC21000269.hg	763	TC21000269.hg		9.42754	0.92995	1.7476	-3.86183	0.64218	14.0432	0 .	16 x 45
TC16000304.hg	764	TC16000304.hg	NPIPB8	7.73615	0.499974	1.74708	-1.113	0.77704	20.6935	0 .	14 x 43	16 p11	nuclear pore complex interacting protein family member B8
TC22000014.hg	765	TC22000014.hg		4.27093	0.547696	1.747	-0.971772	0.742934	18.6055	0 .	12 x 45	22 q11	novel transcript
TC20001195.hg	766	TC20001195.hg		6.8593	0.606928	1.7466	-1.56432	0.500011	9.67843	0 .	6 x 45
TC07002713.hg	767	TC07002713.hg		6.15484	0.739382	1.74623	-1.57555	0.859942	28.2435	0 .	14 x 45
TC13000205.hg	768	TC13000205.hg		4.91044	0.518532	1.74559	-0.837837	0.79473	21.9488	0 .	9 x 45
TC06002065.hg	769	TC06002065.hg	TBC1D32	4.8413	0.51954	1.74435	-1.15582	0.689601	15.9624	0 .	10 x 45	6 q22	TBC1 domain family member 32
TC02004559.hg	770	TC02004559.hg	IWS1	5.13849	0.781184	1.74432	-1.97502	0.804445	22.7009	0 .	15 x 45	2 q14	interacts with SUPT6H, CTD assembly factor 1
TC11002227.hg	771	TC11002227.hg		3.86986	0.741229	1.74339	-1.5922	0.716882	17.2364	0 .	13 x 45
TC0X000087.hg	772	TC0X000087.hg	SCML1	6.56522	0.652773	1.74274	-1.60561	0.585809	12.1167	0 .	6 x 45	X p22	Scm polycomb group protein like 1
TC20000046.hg	773	TC20000046.hg	PANK2	6.05871	0.614073	1.74243	-1.90677	0.641833	14.0303	0 .	14 x 43	20 p13	pantothenate kinase 2
TC13000570.hg	774	TC13000570.hg	ALG5	6.44987	0.467221	1.742	-1.01303	0.500286	9.68553	0 .	6 x 45	13 q13	ALG5 dolichyl-phosphate beta-glucosyltransferase
TC0X001768.hg	775	TC0X001768.hg		4.16532	0.479219	1.74172	-1.31376	0.705644	16.6939	0 .	9 x 45	X q13	ubiquitin like with PHD and ring finger domains 2 pseudogene 1
TC13000461.hg	776	TC13000461.hg	XPO4	7.444	0.555276	1.74131	-1.44919	0.496076	9.57729	0 .	5 x 45	13 q12	exportin 4
TC06002829.hg	777	TC06002829.hg	EFHC1	6.37448	0.471293	1.7408	-1.51796	0.641272	14.0095	0 .	9 x 45	6 p12	EF-hand domain containing 1
TC01000864.hg	778	TC01000864.hg		6.80225	0.695747	1.73982	-1.87504	0.387414	7.04436	7.18869408444789e-12 .	3 x 45
TC16002065.hg	779	TC16002065.hg	NPIPB5	10.0965	0.615929	1.73936	-1.89079	0.767208	20.0511	0 .	15 x 45	16 p12	nuclear pore complex interacting protein family member B5
TC09002027.hg	780	TC09002027.hg	VPS13A	4.70368	0.59207	1.73912	-1.28331	0.47393	9.02208	0 .	7 x 45	9 q21	vacuolar protein sorting 13 homolog A
TC06000829.hg	781	TC06000829.hg		5.49889	0.507326	1.73888	-1.12139	0.665509	14.9466	0 .	11 x 43	6 q16	novel transcript
TC10002619.hg	782	TC10002619.hg	AGAP5	7.96321	0.503336	1.7377	-1.14937	0.807613	22.9571	0 .	14 x 43	10 q11	ArfGAP with GTPase domain, ankyrin repeat and PH domain 10, pseudogene
TC09002101.hg	783	TC09002101.hg		5.25661	0.569285	1.73738	-1.18835	0.799307	22.2971	0 .	13 x 45
TC11002042.hg	784	TC11002042.hg		5.57931	0.668943	1.73692	-1.87075	0.817494	23.7937	0 .	12 x 45
TC01001808.hg	785	TC01001808.hg		3.95533	0.54396	1.73612	-1.08135	0.801691	22.4827	0 .	15 x 43
TC20001738.hg	786	TC20001738.hg	PCMTD2	8.26102	0.526784	1.73381	-1.34465	0.671623	15.1958	0 .	8 x 45	CHR_HSCHR20_1_CTG3 q13	novel transcript
TC20000083.hg	787	TC20000083.hg	SLX4IP	6.79171	0.529714	1.73173	-1.24339	0.41595	7.66736	1.44106948596345e-13 .	6 x 44	20 p12	SLX4 interacting protein
TC07001837.hg	788	TC07001837.hg		6.44667	0.549474	1.73169	-1.45464	0.756573	19.3949	0 .	9 x 45	7 q31	TEC
TC13000099.hg	789	TC13000099.hg	USPL1	7.39355	0.571533	1.73111	-1.23857	0.512907	10.0157	0 .	6 x 45	13 q12	ubiquitin specific peptidase like 1
TC13000157.hg	790	TC13000157.hg	DNAJC15	8.40598	0.710328	1.72961	-2.6424	0.303107	5.33182	1.00020490001462e-07 .	4 x 45	13 q14	DnaJ heat shock protein family (Hsp40) member C15
TC11001884.hg	791	TC11001884.hg	SNHG1	6.97904	0.600898	1.72875	-1.28525	0.645203	14.1563	0 .	11 x 43	11 q12	small nucleolar RNA host gene 1
TC06003871.hg	792	TC06003871.hg	MAP7	6.69063	0.637813	1.72733	-2.36617	0.481482	9.20881	0 .	3 x 45	6 q23	novel transcript
TC15002385.hg	793	TC15002385.hg	MCTP2	3.71768	0.611826	1.72583	-1.19386	0.569417	11.6114	0 .	12 x 43	15 q26	multiple C2 and transmembrane domain containing 2
TC02003947.hg	794	TC02003947.hg		5.25117	0.590331	1.72468	-1.38366	0.622306	13.3266	0 .	11 x 43
TC0X000972.hg	795	TC0X000972.hg		4.17253	0.6677	1.72467	-1.72864	0.741007	18.4983	0 .	13 x 45	X p11	RNA, U6 small nuclear 202, pseudogene
TC02001241.hg	796	TC02001241.hg		5.35841	0.554784	1.72252	-1.21762	0.72866	17.8347	0 .	15 x 43	2 q34	KANSL1L antisense RNA 1
TC17001474.hg	797	TC17001474.hg	KRT23	7.10464	0.8055	1.72246	-1.5087	0.268708	4.67636	2.27026465260405e-06 .	4 x 45	CHR_HSCHR17_4_CTG4 q21	keratin 23
TC09001206.hg	798	TC09001206.hg		4.91227	0.583972	1.72221	-1.46214	0.717733	17.2786	0 .	13 x 44	9 q21
TC06002095.hg	799	TC06002095.hg		5.17192	0.55476	1.72201	-1.07513	0.689165	15.9432	0 .	12 x 44
TC15002195.hg	800	TC15002195.hg		5.68784	0.551286	1.71996	-0.933761	0.712096	17.0022	0 .	12 x 43	15 q21	GABPB1 antisense RNA 1
TC06003304.hg	801	TC06003304.hg		4.69473	0.63127	1.71776	-1.12234	0.729687	17.8884	0 .	12 x 45
TC10002704.hg	802	TC10002704.hg		5.19324	0.454009	1.7157	-1.13127	0.735742	18.2105	0 .	11 x 43	10 q22	novel transcript to NUDT13
TC13001340.hg	803	TC13001340.hg		5.82252	0.477828	1.7154	-1.37124	0.650035	14.3394	0 .	8 x 45
TC22000190.hg	804	TC22000190.hg		5.42486	0.542574	1.71428	-1.27011	0.733193	18.0738	0 .	11 x 45	22 q12	ZNRF3 intronic transcript 1
TC16001838.hg	805	TC16001838.hg	NPIPB5	10.2194	0.592934	1.71178	-1.42081	0.751163	19.0751	0 .	14 x 44	16 p12	nuclear pore complex interacting protein family member B5
TC07001917.hg	806	TC07001917.hg	KDM7A	8.43272	0.555015	1.70972	-1.57901	0.638344	13.9014	0 .	5 x 45	7 q34	lysine demethylase 7A
TC16001232.hg	807	TC16001232.hg		6.64981	0.712747	1.70922	-1.43538	0.802513	22.5474	0 .	15 x 45
TC16001420.hg	808	TC16001420.hg		4.7136	0.564178	1.70883	-1.19616	0.771553	20.3306	0 .	14 x 44	16 p13	novel transcript
TC13000355.hg	809	TC13000355.hg		5.51029	0.549333	1.70841	-1.2501	0.741563	18.5291	0 .	12 x 45	13 q32	microRNA 623
TC21000401.hg	810	TC21000401.hg	PAXBP1	6.57028	0.490715	1.70771	-1.29582	0.753898	19.2356	0 .	12 x 43	21 q22	PAX3 and PAX7 binding protein 1
TC22000010.hg	811	TC22000010.hg		9.37817	0.83912	1.70718	-2.50781	0.597008	12.4748	0 .	16 x 45
TC0X000062.hg	812	TC0X000062.hg		3.9693	0.51387	1.70607	-1.02803	0.789617	21.5717	0 .	13 x 43
TC04001935.hg	813	TC04001935.hg	PACRGL	5.26563	0.582137	1.70435	-1.41283	0.746456	18.8041	0 .	10 x 45	4 p15	parkin coregulated like
TC13000653.hg	814	TC13000653.hg	MED4	7.88517	0.441261	1.70322	-1.15142	0.619585	13.2319	0 .	6 x 45	13 q14	mediator complex subunit 4
TC16002105.hg	815	TC16002105.hg		8.58572	0.744983	1.70317	-1.90238	0.84229	26.1943	0 .	15 x 45
TC01002761.hg	816	TC01002761.hg		5.41836	0.64654	1.70232	-1.80138	0.74965	18.9872	0 .	16 x 45	1 p31	RNA, U7 small nuclear 80 pseudogene
TC12000573.hg	817	TC12000573.hg		3.8207	0.639821	1.70124	-1.63713	0.776074	20.6288	0 .	17 x 45	12 q14	microRNA 548c
TC01004069.hg	818	TC01004069.hg		6.11939	0.586763	1.70121	-1.4568	0.726686	17.7322	0 .	14 x 44	1 q44	RNA, 5S ribosomal pseudogene 82
TC07000264.hg	819	TC07000264.hg		5.85213	0.705627	1.70121	-1.91416	0.809687	23.1278	0 .	16 x 45	7 p14	RNA, U7 small nuclear 35 pseudogene
TC07003278.hg	820	TC07003278.hg	LMBR1	5.96706	0.571382	1.70069	-1.29866	0.621723	13.3063	0 .	8 x 45	7 q36	limb development membrane protein 1
TC03001548.hg	821	TC03001548.hg		4.73908	0.617049	1.70024	-1.84221	0.666303	14.9786	0 .	16 x 43	3 p13	FOXP1 intronic transcript 1
TC02004201.hg	822	TC02004201.hg		5.08577	0.635721	1.69961	-1.47034	0.830754	25.018	0 .	13 x 45
TC13000551.hg	823	TC13000551.hg		4.22962	0.612574	1.69593	-1.05891	0.70529	16.6772	0 .	15 x 43
TC07002357.hg	824	TC07002357.hg	ZNF736	4.95405	0.712953	1.69582	-1.76431	0.617399	13.1564	0 .	7 x 45	7 q11	zinc finger protein 736
TC13000793.hg	825	TC13000793.hg	TGDS	6.75349	0.506949	1.69395	-1.09977	0.393896	7.18366	3.05533376376843e-12 .	6 x 45	13 q32	TDP-glucose 4,6-dehydratase
TC03002963.hg	826	TC03002963.hg		4.82285	0.586805	1.69394	-1.29832	0.6919	16.0643	0 .	16 x 43	3 p13	FOXP1 intronic transcript 1
TC02000264.hg	827	TC02000264.hg		3.45579	0.56621	1.69136	-1.31986	0.675092	15.3397	0 .	13 x 43
TC08002454.hg	828	TC08002454.hg		4.97791	0.598813	1.69099	-1.64795	0.773312	20.4456	0 .	12 x 45
TC13000141.hg	829	TC13000141.hg	WBP4	6.9388	0.411881	1.69089	-0.901047	0.446689	8.36925	1.33226762955019e-15 .	7 x 45	13 q14	WW domain binding protein 4
TC10002299.hg	830	TC10002299.hg		5.65686	0.649523	1.69067	-1.52678	0.687754	15.8812	0 .	13 x 45
TC13000878.hg	831	TC13000878.hg		8.51353	0.5847	1.68682	-1.64945	0.707062	16.7609	0 .	11 x 45
TC08001104.hg	832	TC08001104.hg		7.55157	0.714576	1.68627	-2.32896	0.820699	24.0783	0 .	16 x 45
TC13000895.hg	833	TC13000895.hg	DCUN1D2	6.06921	0.440788	1.68369	-0.753382	0.706176	16.719	0 .	8 x 45	13 q34	defective in cullin neddylation 1 domain containing 2
TC09002106.hg	834	TC09002106.hg	MFSD14C	4.31043	0.535336	1.68299	-1.29189	0.778969	20.8239	0 .	11 x 45	9 q22	major facilitator superfamily domain containing 14C
TC22000789.hg	835	TC22000789.hg		5.09651	0.559188	1.68269	-1.24912	0.794156	21.9059	0 .	13 x 45	22 q11	novel transcript
TC11001752.hg	836	TC11001752.hg		4.25912	0.633269	1.68262	-1.51398	0.730229	17.9169	0 .	15 x 45	11 p11
TC10001456.hg	837	TC10001456.hg		6.19338	0.629273	1.68188	-1.57711	0.82451	24.4258	0 .	15 x 45	10 q22	NUTM2B antisense RNA 1
TC09002746.hg	838	TC09002746.hg		3.95969	0.505201	1.68183	-1.41428	0.778961	20.8234	0 .	12 x 44
TC06001724.hg	839	TC06001724.hg	USP49	5.08003	0.490695	1.68056	-1.41527	0.453613	8.53227	4.44089209850063e-16 .	7 x 44	6 p21	ubiquitin specific peptidase 49
TC07002568.hg	840	TC07002568.hg	SND1	5.85905	0.616455	1.67753	-1.3245	0.801121	22.438	0 .	13 x 45	7 q32	SND1 intronic transcript 1
TC13000130.hg	841	TC13000130.hg	UFM1	7.81439	0.478687	1.67503	-1.22218	0.540653	10.7733	0 .	6 x 45	13 q13	ubiquitin fold modifier 1
TC06003647.hg	842	TC06003647.hg	USP49	5.07437	0.480431	1.67404	-1.42384	0.443577	8.2966	2.22044604925031e-15 .	7 x 43	6 p21	ubiquitin specific peptidase 49
TC13000861.hg	843	TC13000861.hg	ARGLU1	8.88831	0.624111	1.67339	-1.45359	0.732425	18.0329	0 .	11 x 45	13 q33	arginine and glutamate rich 1
TC06002145.hg	844	TC06002145.hg		5.44672	0.759192	1.67032	-1.8892	0.790456	21.6327	0 .	11 x 45
TC13000474.hg	845	TC13000474.hg	MICU2	6.51575	0.504543	1.67011	-1.26872	0.45451	8.55352	4.44089209850063e-16 .	5 x 45	13 q12	mitochondrial calcium uptake 2
TC21000925.hg	846	TC21000925.hg	PAXBP1	7.23317	0.525457	1.66986	-1.53708	0.723148	17.5507	0 .	11 x 43	21 q22	PAX3 and PAX7 binding protein 1
TC05000714.hg	847	TC05000714.hg		5.07036	0.599484	1.66961	-1.34631	0.711498	16.9732	0 .	15 x 44
TC04000284.hg	848	TC04000284.hg		6.52004	0.642525	1.66942	-2.13318	0.606083	12.7732	0 .	16 x 44
TC04001191.hg	849	TC04001191.hg		6.52004	0.642525	1.66942	-2.13318	0.606083	12.7732	0 .	16 x 44
TC07003305.hg	850	TC07003305.hg	ARHGEF35	7.4552	0.541673	1.66466	-1.91265	0.334856	5.95711	3.82922360486759e-09 .	3 x 45	7 q35	Rho guanine nucleotide exchange factor 35
TC13000150.hg	851	TC13000150.hg	DGKH	7.18709	0.643931	1.66392	-2.11562	0.664127	14.891	0 .	10 x 45	13 q14	diacylglycerol kinase eta
TC07003155.hg	852	TC07003155.hg		5.24416	0.559745	1.65701	-1.5082	0.794229	21.9113	0 .	10 x 45	7 q31	TEC
TC02001737.hg	853	TC02001737.hg		6.11243	0.764598	1.65608	-2.21451	0.814472	23.5314	0 .	14 x 45	2 p22	RNA, U6 small nuclear 577, pseudogene
TC06003309.hg	854	TC06003309.hg		3.1804	0.598763	1.65216	-0.998458	0.651124	14.3811	0 .	12 x 44
TC03003035.hg	855	TC03003035.hg	CFAP44	4.01868	0.532284	1.65199	-1.25843	0.672376	15.2269	0 .	9 x 45	3 q13	cilia and flagella associated protein 44
TC13001517.hg	856	TC13001517.hg		2.83542	0.476275	1.65129	-0.965464	0.402588	7.37245	9.41691169487058e-13 .	6 x 45
TC11002536.hg	857	TC11002536.hg		7.39252	0.71968	1.64945	-2.17403	0.56093	11.358	0 .	12 x 44
TC04000216.hg	858	TC04000216.hg		5.1227	0.619812	1.64928	-2.11342	0.770722	20.2766	0 .	17 x 45
TC06003313.hg	859	TC06003313.hg		5.34624	0.606433	1.64928	-1.41158	0.678983	15.5033	0 .	12 x 44
TC05001697.hg	860	TC05001697.hg		5.97656	0.595185	1.64651	-2.12533	0.84433	26.4146	0 .	16 x 45
TC04001187.hg	861	TC04001187.hg		7.80852	0.664615	1.6463	-1.83227	0.655263	14.5409	0 .	16 x 45
TC04001189.hg	862	TC04001189.hg		7.80852	0.664615	1.6463	-1.83227	0.655263	14.5409	0 .	16 x 45
TC11001935.hg	863	TC11001935.hg	LTBP3	3.92309	0.700178	1.64554	-1.8174	0.744014	18.666	0 .	16 x 45	11 q13	latent transforming growth factor beta binding protein 3
TC0X001977.hg	864	TC0X001977.hg		3.96118	0.523457	1.64532	-1.06771	0.669048	15.0901	0 .	9 x 45
TC06001675.hg	865	TC06001675.hg	STK38	8.37719	0.577484	1.64429	-1.76277	0.57376	11.7432	0 .	5 x 45	6 p21	serine/threonine kinase 38
TC14001176.hg	866	TC14001176.hg		5.76387	0.607241	1.64349	-1.32516	0.745477	18.7485	0 .	17 x 45	14 q23	RNA, U6 small nuclear 341, pseudogene
TC12001239.hg	867	TC12001239.hg	TAS2R31	5.80517	0.674989	1.64299	-1.25201	0.755648	19.3395	0 .	15 x 45	CHR_HSCHR12_2_CTG2 p13	taste 2 receptor member 31
TC07000874.hg	868	TC07000874.hg		3.87554	0.552827	1.64211	-1.0537	0.760587	19.6381	0 .	14 x 43
TC16000945.hg	869	TC16000945.hg		9.52438	0.698133	1.64208	-1.58298	0.749901	19.0018	0 .	15 x 45	16 p12	SMG1 pseudogene 1
TC01002501.hg	870	TC01002501.hg		4.95428	0.687402	1.64109	-1.59481	0.887001	32.1998	0 .	15 x 45
TC09002410.hg	871	TC09002410.hg	ZDHHC21	4.36825	0.600661	1.63923	-1.65977	0.666504	14.9867	0 .	9 x 45	9 p22	zinc finger DHHC-type containing 21
TC15000631.hg	872	TC15000631.hg		9.31994	0.678936	1.63907	-3.80337	0.816469	23.7042	0 .	16 x 45
TC09002571.hg	873	TC09002571.hg	CBWD2	5.95231	0.563201	1.63858	-1.96819	0.799073	22.279	0 .	9 x 45	2 q14	COBW domain containing 2
TC20000065.hg	874	TC20000065.hg	CRLS1	7.39061	0.506572	1.63766	-1.36938	0.452102	8.49651	5.55111512312578e-16 .	7 x 43	20 p12	cardiolipin synthase 1
TC08001585.hg	875	TC08001585.hg		3.68138	0.553027	1.63594	-1.3074	0.778747	20.8088	0 .	13 x 44	8 q24	microRNA 548d-1
TC05003050.hg	876	TC05003050.hg		6.96139	0.645756	1.63505	-1.38544	0.74271	18.593	0 .	17 x 45
TC09002383.hg	877	TC09002383.hg	RFX3	4.80641	0.701987	1.63286	-2.54214	0.45668	8.60508	2.22044604925031e-16 .	6 x 45	9 p24	regulatory factor X3
TC0X000349.hg	878	TC0X000349.hg		4.93769	0.554206	1.63232	-1.06135	0.782888	21.0935	0 .	11 x 45
TC01000016.hg	879	TC01000016.hg		5.645	0.520697	1.63207	-1.15874	0.756882	19.4134	0 .	13 x 43	1 p36	long intergenic non-protein coding RNA 1409
TC02002282.hg	880	TC02002282.hg	IWS1	5.3909	0.723111	1.6295	-1.68626	0.806068	22.8315	0 .	15 x 45	2 q14	interacts with SUPT6H, CTD assembly factor 1
TC06001132.hg	881	TC06001132.hg	TULP4	8.22016	0.436421	1.62354	-1.28465	0.392844	7.16096	3.51496609596325e-12 .	6 x 45	6 q25	TUB like protein 4
TC05002974.hg	882	TC05002974.hg	RPL37	6.79956	0.528498	1.62338	-1.34674	0.536478	10.6563	0 .	8 x 44	5 p13	ribosomal protein L37
TC07002712.hg	883	TC07002712.hg		4.39819	0.505306	1.62234	-1.23214	0.82595	24.5598	0 .	12 x 45
TC06003340.hg	884	TC06003340.hg		3.98253	0.550313	1.62123	-1.39376	0.589973	12.2485	0 .	11 x 43
TC07002242.hg	885	TC07002242.hg		5.67219	0.585389	1.62098	-1.38053	0.381012	6.90799	1.64332991658966e-11 .	4 x 45
TC09001442.hg	886	TC09001442.hg		7.68841	0.655998	1.62012	-2.74604	0.844346	26.4163	0 .	16 x 45
TC0X000049.hg	887	TC0X000049.hg		3.99492	0.57871	1.618	-1.45849	0.786941	21.3791	0 .	17 x 45
TC13000754.hg	888	TC13000754.hg	OBI1	6.9538	0.486633	1.61628	-1.51168	0.562028	11.3905	0 .	6 x 45	13 q31	ORC ubiquitin ligase 1
TC01002605.hg	889	TC01002605.hg	ZSWIM5	6.63979	0.659429	1.61419	-1.35984	0.307698	5.42096	6.3864861843399e-08 .	3 x 45	1 p34	zinc finger SWIM-type containing 5
TC16001802.hg	890	TC16001802.hg	NPIPB5	9.94017	0.71288	1.61063	-1.79714	0.814343	23.5205	0 .	15 x 45	16 p12	SMG1 pseudogene 1
TC13000026.hg	891	TC13000026.hg		5.17136	0.477662	1.60996	-1.26363	0.612281	12.9815	0 .	8 x 45	13 q12	RNA, U2 small nuclear 7, pseudogene
TC13000571.hg	892	TC13000571.hg	SUPT20H	7.49564	0.50254	1.60638	-1.69779	0.595946	12.4403	0 .	6 x 45	13 q13	SPT20 homolog, SAGA complex component
TC13000367.hg	893	TC13000367.hg	TPP2	8.12844	0.463657	1.6039	-1.22637	0.465258	8.81085	0 .	6 x 45	13 q33	tripeptidyl peptidase 2
TC21000270.hg	894	TC21000270.hg		8.95312	0.860407	1.60362	-3.15931	0.662699	14.8338	0 .	16 x 45
TC22000460.hg	895	TC22000460.hg	KCNMB3	4.85309	0.46829	1.60301	-1.1221	0.667546	15.029	0 .	9 x 44	22 q11	potassium calcium-activated channel subfamily M regulatory beta subunit 3 pseudogene 1
TC01005403.hg	896	TC01005403.hg	SFPQ	7.41537	0.613022	1.60224	-1.52462	0.78345	21.1327	0 .	17 x 45	1 p34	splicing factor proline and glutamine rich
TC06001809.hg	897	TC06001809.hg	ICK	7.82187	0.481026	1.60218	-1.24168	0.281438	4.9165	7.50245636949032e-07 .	5 x 44	6 p12	intestinal cell kinase
TC0X001738.hg	898	TC0X001738.hg	ZC3H12B	6.06715	0.622134	1.60206	-1.44528	0.59334	12.3563	0 .	7 x 45	X q11	zinc finger CCCH-type containing 12B
TC13001025.hg	899	TC13001025.hg	UFM1	8.72489	0.536787	1.60034	-1.29048	0.434895	8.09587	8.65973959207622e-15 .	6 x 45	13 q13	ubiquitin fold modifier 1
TC10000916.hg	900	TC10000916.hg	BCCIP	5.99642	0.660222	1.60031	-2.00604	0.821424	24.1437	0 .	17 x 45	10 q26	BRCA2 and CDKN1A interacting protein
TC12001242.hg	901	TC12001242.hg	TAS2R43	5.67046	0.580715	1.60022	-1.15344	0.724509	17.6202	0 .	15 x 44	CHR_HSCHR12_2_CTG2 p13	taste 2 receptor member 43
TC07001715.hg	902	TC07001715.hg	NAPEPLD	6.48666	0.547249	1.5952	-1.4906	0.556101	11.2162	0 .	5 x 44	7 q22	N-acyl phosphatidylethanolamine phospholipase D
TC13000887.hg	903	TC13000887.hg	TUBGCP3	7.42643	0.460533	1.59319	-1.05425	0.588554	12.2034	0 .	7 x 45	13 q34	tubulin gamma complex associated protein 3
TC09001469.hg	904	TC09001469.hg		4.34066	0.658822	1.59288	-1.53098	0.645739	14.1765	0 .	11 x 45
TC05000167.hg	905	TC05000167.hg		3.38168	0.506102	1.59165	-1.12181	0.778379	20.7839	0 .	14 x 43	5 p13	RNA, U7 small nuclear 75 pseudogene
TC12002524.hg	906	TC12002524.hg		5.3666	0.604788	1.5905	-1.55536	0.685912	15.8008	0 .	15 x 43	12 q22	microRNA 331
TC03003083.hg	907	TC03003083.hg		6.81917	0.484403	1.58948	-1.08836	0.787129	21.3926	0 .	12 x 43
TC20001222.hg	908	TC20001222.hg		6.38256	0.667588	1.58869	-1.64232	0.751401	19.089	0 .	14 x 45
TC11002200.hg	909	TC11002200.hg		4.58065	0.601481	1.58759	-1.40917	0.766057	19.9782	0 .	13 x 44	11 q21	microRNA 548l
TC13000659.hg	910	TC13000659.hg		5.46793	0.56026	1.58686	-1.41264	0.810021	23.1555	0 .	17 x 45
TC04000494.hg	911	TC04000494.hg		4.31787	0.455294	1.5868	-0.905096	0.59476	12.402	0 .	8 x 44
TC06000716.hg	912	TC06000716.hg		5.71469	0.672086	1.58651	-1.69853	0.805244	22.765	0 .	16 x 45	6 q13	RNA, U7 small nuclear 48 pseudogene
TC13000145.hg	913	TC13000145.hg	NAA16	6.1582	0.457566	1.58409	-1.17586	0.714301	17.1094	0 .	7 x 45	13 q14	N(alpha)-acetyltransferase 16, NatA auxiliary subunit
TC13000435.hg	914	TC13000435.hg	CDC16	8.30874	0.502165	1.58339	-1.20186	0.588072	12.1882	0 .	7 x 45	13 q34	cell division cycle 16
TC03001102.hg	915	TC03001102.hg		4.9109	0.600337	1.58231	-1.5485	0.755161	19.3105	0 .	14 x 45	3 q29	novel transcript
TC12002307.hg	916	TC12002307.hg		4.63181	0.536506	1.58134	-1.0169	0.74886	18.9417	0 .	12 x 44
TC17002513.hg	917	TC17002513.hg	NCOR1	4.81953	0.685605	1.57957	-1.68354	0.738432	18.3566	0 .	14 x 45	17 p11	nuclear receptor corepressor 1
TC0X001259.hg	918	TC0X001259.hg	RBM41	6.7749	0.422697	1.57913	-1.1548	0.597689	12.4969	0 .	7 x 43	X q22	RNA binding motif protein 41
TC03000351.hg	919	TC03000351.hg	CACNA1D	6.31011	0.667432	1.57755	-1.36642	0.592552	12.331	0 .	5 x 45	3 p21	calcium voltage-gated channel subunit alpha1 D
TC13000978.hg	920	TC13000978.hg	RPL21	10.8646	0.498866	1.57593	-1.27644	0.287383	5.02959	4.38839787841871e-07 .	5 x 45	7 p21	ribosomal protein L21 pseudogene 75
TC10001037.hg	921	TC10001037.hg	USP6NL	7.93722	0.550149	1.57541	-1.41649	0.499712	9.67073	0 .	5 x 45	10 p14	USP6 N-terminal like
TC13000226.hg	922	TC13000226.hg	SUGT1	8.67123	0.493009	1.57516	-1.38784	0.51495	10.0699	0 .	6 x 45	13 q14	SGT1 homolog, MIS12 kinetochore complex assembly cochaperone
TC13000171.hg	923	TC13000171.hg	GTF2F2	7.22038	0.593012	1.57329	-1.76884	0.541131	10.7868	0 .	5 x 45	13 q14	general transcription factor IIF subunit 2
TC11003288.hg	924	TC11003288.hg		5.46961	0.614221	1.57269	-1.5856	0.559244	11.3083	0 .	11 x 43
TC13000807.hg	925	TC13000807.hg	UGGT2	6.5163	0.514017	1.57195	-1.50705	0.667451	15.0251	0 .	7 x 45	13 q32	UDP-glucose glycoprotein glucosyltransferase 2
TC03003294.hg	926	TC03003294.hg		6.0602	0.587513	1.57175	-1.44915	0.810905	23.2293	0 .	11 x 45	3 q29	programmed cell death 6 (PDCD6) pseudogene
TC04002664.hg	927	TC04002664.hg		4.67334	0.409751	1.57143	-0.825478	0.530229	10.4832	0 .	7 x 44	4 q24	novel transcript
TC07001804.hg	928	TC07001804.hg	TSPAN12	6.43281	0.552399	1.57122	-1.23907	0.265074	4.6083	3.0828699468799e-06 .	4 x 45	7 q31	tetraspanin 12
TC12000686.hg	929	TC12000686.hg		7.77584	0.608836	1.56634	-1.71555	0.843822	26.3593	0 .	12 x 45	12 q21	long intergenic non-protein coding RNA 2820
TC13001407.hg	930	TC13001407.hg	HMGB1	10.7706	0.567227	1.56245	-1.61896	0.417304	7.69757	1.18571819029967e-13 .	4 x 45	22 q12	high mobility group box 1 pseudogene 10
TC16002101.hg	931	TC16002101.hg	NPIPB5	10.1632	0.683647	1.5624	-1.68244	0.822139	24.2085	0 .	15 x 45	16 p12	SMG1 pseudogene 1
TC03001714.hg	932	TC03001714.hg	CCDC14	6.6003	0.552266	1.56179	-1.41221	0.828547	24.8053	0 .	10 x 45	3 q21	coiled-coil domain containing 14
TC0X000811.hg	933	TC0X000811.hg		7.17534	0.481227	1.55774	-1.40867	0.451552	8.48353	6.66133814775094e-16 .	7 x 43	X p22	novel transcript
TC07002510.hg	934	TC07002510.hg		4.65977	0.519065	1.55659	-0.917706	0.733245	18.0766	0 .	11 x 43
TC07002574.hg	935	TC07002574.hg		7.16987	0.566723	1.5549	-1.31582	0.799229	22.2911	0 .	15 x 44
TC16002099.hg	936	TC16002099.hg		9.8902	0.658652	1.55445	-1.46089	0.805158	22.758	0 .	15 x 45	16 p12	SMG1 pseudogene 1
TC09001580.hg	937	TC09001580.hg	NR6A1	6.38031	0.566517	1.55328	-1.20333	0.602342	12.6492	0 .	6 x 45	9 q33	nuclear receptor subfamily 6 group A member 1
TC04001611.hg	938	TC04001611.hg		5.05242	0.591812	1.55273	-1.31253	0.78659	21.3541	0 .	15 x 45
TC19002413.hg	939	TC19002413.hg	ZNF91	8.10064	0.54349	1.55258	-1.31201	0.511776	9.98574	0 .	6 x 44	19 p12	zinc finger protein 91
TC10001395.hg	940	TC10001395.hg		7.98716	0.778219	1.55204	-2.18852	0.866828	29.1425	0 .	16 x 45
TC16002094.hg	941	TC16002094.hg		9.95885	0.665777	1.5517	-1.55869	0.807897	22.9802	0 .	15 x 45	16 p12	SMG1 pseudogene 1
TC16001450.hg	942	TC16001450.hg		10.2315	0.640594	1.55159	-1.60242	0.795658	22.0186	0 .	15 x 45	16 p12	SMG1 pseudogene 1
TC13001720.hg	943	TC13001720.hg	BIVM	6.86074	0.5169	1.55046	-1.4864	0.620379	13.2595	0 .	7 x 45	13 q33	BIVM-ERCC5 readthrough
TC05000222.hg	944	TC05000222.hg		7.21274	0.753647	1.5498	-1.98978	0.883735	31.655	0 .	16 x 45
TC13000025.hg	945	TC13000025.hg	IFT88	6.08433	0.530763	1.54907	-1.34116	0.522199	10.2643	0 .	6 x 45	13 q12	intraflagellar transport 88
TC07002014.hg	946	TC07002014.hg	ACTR3C	6.8071	0.490701	1.54667	-1.37813	0.734897	18.165	0 .	8 x 44	7 q36	actin related protein 3C
TC12002172.hg	947	TC12002172.hg		4.49935	0.560989	1.5454	-1.324	0.747221	18.8477	0 .	16 x 43
TC13000626.hg	948	TC13000626.hg	NUFIP1	6.90175	0.561245	1.54464	-1.47856	0.45155	8.48349	6.66133814775094e-16 .	5 x 45	13 q14	nuclear FMR1 interacting protein 1
TC07002487.hg	949	TC07002487.hg	ZKSCAN1	8.35317	0.749522	1.54287	-2.21806	0.661626	14.7911	0 .	4 x 45	7 q22	zinc finger with KRAB and SCAN domains 1
TC03002877.hg	950	TC03002877.hg		5.5188	0.585793	1.54274	-1.43595	0.654609	14.5155	0 .	12 x 44
TC02001431.hg	951	TC02001431.hg		5.76336	0.500983	1.54255	-1.10792	0.699655	16.4152	0 .	12 x 43	2 q37	AGAP1 intronic transcript 1
TC07001223.hg	952	TC07001223.hg	HOXA7	7.48842	0.655028	1.54207	-1.46719	0.0735555	1.23636	0.108677967359401 .	4 x 45	7 p15	homeobox A7
TC09000099.hg	953	TC09000099.hg	FOCAD	6.89605	0.609075	1.54086	-1.98077	0.477161	9.10165	0 .	5 x 44	9 p21	focadhesin
TC09002317.hg	954	TC09002317.hg		8.32133	0.785254	1.54081	-1.77416	0.280866	4.90564	7.89502241360651e-07 .	3 x 44
TC02001269.hg	955	TC02001269.hg		5.74765	0.609714	1.54035	-2.0337	0.855704	27.7201	0 .	15 x 45
TC05001757.hg	956	TC05001757.hg	CCDC141	5.41988	0.684575	1.54032	-2.52068	0.775317	20.5783	0 .	17 x 45	2 q31	coiled-coil domain containing 141
TC20001733.hg	957	TC20001733.hg	STX16	8.77456	0.543567	1.54009	-1.20325	0.764705	19.8932	0 .	8 x 45	20 q13	STX16-NPEPL1 readthrough (NMD candidate)
TC13000602.hg	958	TC13000602.hg		6.07478	0.448715	1.54002	-1.07107	0.69884	16.3778	0 .	8 x 45
TC03001589.hg	959	TC03001589.hg		5.68192	0.610483	1.53992	-1.54043	0.783044	21.1044	0 .	17 x 45
TC09002139.hg	960	TC09002139.hg		6.5119	0.608775	1.53839	-1.49538	0.779165	20.8372	0 .	15 x 45
TC10001393.hg	961	TC10001393.hg		6.53076	0.76341	1.53827	-1.87424	0.855841	27.7367	0 .	16 x 45
TC12002257.hg	962	TC12002257.hg		4.9777	0.506019	1.53724	-1.38365	0.467242	8.85888	0 .	7 x 43	12 p13	GPRC5D and HEBP1 antisense RNA 1
TC03002252.hg	963	TC03002252.hg	HMGB1	10.8575	0.578803	1.53693	-1.42315	0.475824	9.06868	0 .	5 x 45	15 q23	high mobility group box 1 pseudogene 6
TC02004160.hg	964	TC02004160.hg	STRN	5.91949	0.52514	1.53503	-1.42449	0.517698	10.1432	0 .	6 x 45	2 p22	TEC
TC09002803.hg	965	TC09002803.hg		6.04016	0.488157	1.53359	-1.38134	0.474136	9.02715	0 .	6 x 45	9 q34	SLC25A25 antisense RNA 1
TC13000021.hg	966	TC13000021.hg	ZMYM2	8.0005	0.533888	1.53199	-1.51357	0.671978	15.2104	0 .	6 x 45	13 q12	zinc finger MYM-type containing 2
TC16000868.hg	967	TC16000868.hg		5.45633	0.53092	1.53172	-1.16797	0.81891	23.9187	0 .	17 x 44	16 p13	microRNA 548h-2
TC04002481.hg	968	TC04002481.hg	LCORL	6.73008	0.58088	1.52906	-2.44473	0.566998	11.5387	0 .	7 x 45	4 p15	ligand dependent nuclear receptor corepressor like
TC06003757.hg	969	TC06003757.hg		6.60902	0.550686	1.52901	-1.49879	0.55206	11.0988	0 .	8 x 45
TC01002054.hg	970	TC01002054.hg		6.6356	0.548403	1.52864	-1.3624	0.672458	15.2303	0 .	14 x 43	1 p36	novel transcript
TC16001671.hg	971	TC16001671.hg	KLHL36	6.95372	0.512534	1.52793	-1.14185	0.478309	9.13004	0 .	6 x 45	16 q24	kelch like family member 36
TC06000771.hg	972	TC06000771.hg		7.31883	0.72677	1.52605	-2.30137	0.874193	30.1787	0 .	16 x 45
TC09002804.hg	973	TC09002804.hg		6.84453	0.570754	1.52536	-1.27427	0.501447	9.71554	0 .	4 x 45	9 q34	SLC25A25 antisense RNA 1
TC13000472.hg	974	TC13000472.hg	ZDHHC20	8.4986	0.577117	1.52495	-1.83049	0.323116	5.72343	1.33740163388296e-08 .	4 x 45	13 q12	zinc finger DHHC-type containing 20
TC13000596.hg	975	TC13000596.hg		5.33556	0.428447	1.52491	-0.798839	0.799086	22.28	0 .	8 x 45
TC19000402.hg	976	TC19000402.hg	ZNF730	4.80457	0.560004	1.52395	-1.24519	0.484657	9.28809	0 .	7 x 45	19 p12	zinc finger protein 730
TC15000142.hg	977	TC15000142.hg	HERC2	8.32996	0.574935	1.523	-1.32966	0.796294	22.0666	0 .	14 x 44	15 q11	hect domain and RLD 2 pseudogene 3
TC03001660.hg	978	TC03001660.hg	CFAP44	5.35223	0.540059	1.52253	-1.08988	0.813286	23.4301	0 .	11 x 45	3 q13	cilia and flagella associated protein 44
TC02001909.hg	979	TC02001909.hg	VPS54	6.80626	0.47191	1.52027	-1.10179	0.574011	11.7509	0 .	6 x 45	2 p14	VPS54 subunit of GARP complex
TC02004048.hg	980	TC02004048.hg		4.62355	0.599672	1.51933	-1.21222	0.770036	20.2322	0 .	13 x 45
TC20000830.hg	981	TC20000830.hg		5.43495	0.519963	1.51797	-1.38923	0.78504	21.2443	0 .	12 x 43
TC15001965.hg	982	TC15001965.hg		5.96717	0.646403	1.51712	-2.54616	0.833816	25.3193	0 .	16 x 45
TC15000943.hg	983	TC15000943.hg		5.60349	0.47694	1.51684	-1.1719	0.663805	14.8781	0 .	9 x 45	15 q26	long intergenic non-protein coding RNA 2253
TC11000934.hg	984	TC11000934.hg		3.70585	0.562859	1.5164	-1.10052	0.808326	23.0155	0 .	16 x 44
TC02002467.hg	985	TC02002467.hg	LY75-CD302	8.15289	0.587486	1.51573	-2.84174	0.264734	4.60195	3.1715895220108e-06 .	4 x 45	2 q24	LY75-CD302 readthrough
TC12001491.hg	986	TC12001491.hg	ZFP64	7.78501	0.703406	1.51443	-2.18943	0.884124	31.7186	0 .	15 x 45	20 q13	ZFP64 zinc finger protein
TC14001067.hg	987	TC14001067.hg		5.1118	0.722812	1.51437	-1.89193	0.857949	27.9947	0 .	16 x 45
TC07000871.hg	988	TC07000871.hg	UBN2	7.39813	0.401325	1.51435	-1.02384	0.558739	11.2935	0 .	6 x 44	7 q34	ubinuclein 2
TC01001170.hg	989	TC01001170.hg		5.40437	0.602393	1.51377	-2.21857	0.85513	27.6509	0 .	16 x 45
TC09000354.hg	990	TC09000354.hg	VPS13A	7.09148	0.596734	1.51344	-1.66306	0.637105	13.8559	0 .	7 x 45	9 q21	vacuolar protein sorting 13 homolog A
TC03002795.hg	991	TC03002795.hg		5.69356	0.528344	1.51329	-1.26985	0.847957	26.8162	0 .	11 x 45	3 p25	THUMPD3 antisense RNA 1
TC02004047.hg	992	TC02004047.hg		4.90469	0.477349	1.51135	-1.09777	0.786854	21.373	0 .	12 x 43
TC0X001976.hg	993	TC0X001976.hg	MID1	6.94112	0.661169	1.5105	-1.9289	0.403368	7.38951	8.45767900159444e-13 .	3 x 45	X p22	midline 1
TC19001367.hg	994	TC19001367.hg	ZNF91	8.95513	0.484542	1.51005	-1.3	0.7642	19.8616	0 .	8 x 45	19 p12	zinc finger protein 91
TC01001159.hg	995	TC01001159.hg		5.55781	0.593398	1.50866	-1.96164	0.860754	28.3463	0 .	16 x 45
TC02000874.hg	996	TC02000874.hg	MGAT5	8.67098	0.54263	1.50832	-2.56266	0.332879	5.91755	4.74447237053255e-09 .	4 x 45	2 q21	alpha-1,6-mannosylglycoprotein 6-beta-N-acetylglucosaminyltransferase
TC03001769.hg	997	TC03001769.hg		7.0776	0.504045	1.50818	-1.05612	0.774871	20.5487	0 .	12 x 43
TC03000934.hg	998	TC03000934.hg		5.42242	0.569243	1.50701	-1.12097	0.456727	8.60621	2.22044604925031e-16 .	5 x 45
TC13000454.hg	999	TC13000454.hg	ZMYM5	6.77497	0.42289	1.50659	-1.06723	0.622587	13.3365	0 .	7 x 45	13 q12	zinc finger MYM-type containing 5
TC07001764.hg	1000	TC07001764.hg	TMEM168	7.17195	0.577386	1.50585	-1.60463	0.678607	15.4874	0 .	6 x 45	7 q31	transmembrane protein 168
TC03001763.hg	1001	TC03001763.hg	KIAA1257	8.40592	0.629586	1.50576	-1.74337	0.675992	15.3773	0 .	13 x 44	3 q21	KIAA1257
TC05001283.hg	1002	TC05001283.hg		7.69817	0.762999	1.50563	-2.31439	0.87313	30.0241	0 .	16 x 45
TC01004051.hg	1003	TC01004051.hg		6.66745	0.632169	1.50551	-1.89221	0.816563	23.7124	0 .	17 x 45
TC14000003.hg	1004	TC14000003.hg		6.35641	0.678378	1.50535	-1.74864	0.567406	11.5509	0 .	15 x 44
TC22000459.hg	1005	TC22000459.hg		6.35641	0.678378	1.50535	-1.74864	0.567406	11.5509	0 .	15 x 44
TC13000595.hg	1006	TC13000595.hg	MRPS31	6.96029	0.409531	1.50298	-1.15333	0.557385	11.2537	0 .	6 x 45	13 q14	mitochondrial ribosomal protein S31
TC06002186.hg	1007	TC06002186.hg	ADAT2	6.47614	0.541413	1.50239	-1.46084	0.712495	17.0215	0 .	10 x 43	6 q24	adenosine deaminase tRNA specific 2
TC01003737.hg	1008	TC01003737.hg		5.27606	0.686222	1.50088	-2.10217	0.839797	25.9303	0 .	15 x 45
TC18000118.hg	1009	TC18000118.hg		4.87209	0.512148	1.50037	-2.37613	0.833432	25.2811	0 .	17 x 44
TC13000271.hg	1010	TC13000271.hg	PIBF1	7.06755	0.542695	1.50021	-1.36959	0.716496	17.2173	0 .	7 x 45	13 q21	progesterone immunomodulatory binding factor 1
TC15001337.hg	1011	TC15001337.hg	CEP152	5.93767	0.553151	1.49957	-1.58754	0.650915	14.3731	0 .	10 x 43	15 q21	centrosomal protein 152
TC01005595.hg	1012	TC01005595.hg		5.1298	0.58967	1.49956	-1.88858	0.320656	5.67484	1.72655634234076e-08 .	5 x 44	1 p22	TEC
TC03001263.hg	1013	TC03001263.hg		5.21843	0.554654	1.49923	-2.21389	0.780016	20.8953	0 .	17 x 45
TC13000343.hg	1014	TC13000343.hg	IPO5	7.46233	0.443862	1.49849	-1.15224	0.421421	7.78981	6.51700915454967e-14 .	5 x 44	13 q32	importin 5
TC15001733.hg	1015	TC15001733.hg		6.05277	0.440743	1.49728	-1.10826	0.781527	20.9992	0 .	10 x 44	15 q25	novel transcript
TC12000819.hg	1016	TC12000819.hg		4.11327	0.539307	1.49691	-1.34294	0.770055	20.2334	0 .	17 x 44
TC13000176.hg	1017	TC13000176.hg	COG3	7.82156	0.522066	1.49513	-1.40466	0.656104	14.5737	0 .	6 x 45	13 q14	component of oligomeric golgi complex 3
TC08001683.hg	1018	TC08001683.hg	AGO2	7.97314	0.66618	1.49334	-2.26249	0.556164	11.218	0 .	4 x 44	8 q24	argonaute RISC catalytic component 2
TC13001018.hg	1019	TC13001018.hg		4.19806	0.471961	1.49265	-1.01302	0.679261	15.5151	0 .	9 x 45
TC03001529.hg	1020	TC03001529.hg		5.54573	0.635798	1.49145	-1.7843	0.72535	17.6633	0 .	14 x 45
TC20000337.hg	1021	TC20000337.hg	YWHAB	9.04259	0.507644	1.49127	-1.61244	0.463677	8.77269	1.11022302462516e-16 .	5 x 45	20 q13	tyrosine 3-monooxygenase/tryptophan 5-monooxygenase activation protein beta
TC02001213.hg	1022	TC02001213.hg	EEF1B2	7.41034	0.658724	1.49043	-1.92344	0.541141	10.787	0 .	12 x 43	2 q33	eukaryotic translation elongation factor 1 beta 2
TC0X000075.hg	1023	TC0X000075.hg		8.60129	0.693485	1.48969	-1.63715	0.871694	29.8179	0 .	16 x 45
TC15002105.hg	1024	TC15002105.hg	HERC2	7.83906	0.518029	1.4887	-1.15297	0.792755	21.8017	0 .	14 x 43	15 q11	hect domain and RLD 2 pseudogene 2
TC01005185.hg	1025	TC01005185.hg		6.70806	0.549594	1.48709	-1.26355	0.662016	14.8066	0 .	14 x 43	1 p36	novel transcript
TC10000681.hg	1026	TC10000681.hg	ZNF518A	6.65941	0.513084	1.48692	-1.17408	0.72687	17.7417	0 .	8 x 45	10 q24	zinc finger protein 518A
TC06003302.hg	1027	TC06003302.hg		5.61247	0.626819	1.48655	-1.4318	0.762812	19.7752	0 .	12 x 45
TC10000394.hg	1028	TC10000394.hg		7.76614	0.743619	1.48616	-1.91914	0.908842	36.5223	0 .	15 x 45
TC13000758.hg	1029	TC13000758.hg	RBM26	7.90508	0.460909	1.48572	-1.1021	0.667718	15.036	0 .	7 x 45	13 q31	RNA binding motif protein 26
TC20001199.hg	1030	TC20001199.hg	CBFA2T2	5.43747	0.512426	1.48473	-1.05414	0.794673	21.9445	0 .	12 x 44	20 q11	CBFA2/RUNX1 partner transcriptional co-repressor 2
TC13000921.hg	1031	TC13000921.hg	PARP4	7.75788	0.617043	1.48471	-2.02559	0.312112	5.50704	4.11926370791349e-08 .	4 x 45	13 q12	poly(ADP-ribose) polymerase family member 4
TC15000923.hg	1032	TC15000923.hg		6.69988	0.695444	1.4847	-2.46592	0.833118	25.2499	0 .	16 x 45
TC09000247.hg	1033	TC09000247.hg		6.68042	0.536866	1.48467	-1.56199	0.85672	27.8437	0 .	10 x 45
TC02001878.hg	1034	TC02001878.hg	FANCL	6.24093	0.425388	1.4844	-1.08905	0.703293	16.5837	0 .	8 x 44	2 p16	FA complementation group L
TC07002009.hg	1035	TC07002009.hg		4.42731	0.54268	1.48423	-1.47879	0.782879	21.0929	0 .	14 x 43
TC01000807.hg	1036	TC01000807.hg		9.07028	0.740211	1.48354	-4.06165	0.698517	16.363	0 .	16 x 45
TC20000663.hg	1037	TC20000663.hg		8.62156	0.68276	1.48322	-1.71151	0.867854	29.282	0 .	16 x 45
TC07003154.hg	1038	TC07003154.hg		6.13476	0.461978	1.48317	-1.29606	0.69387	16.1524	0 .	8 x 45
TC07001458.hg	1039	TC07001458.hg		9.52909	0.673422	1.4829	-1.60807	0.88686	32.1758	0 .	15 x 45
TC16000958.hg	1040	TC16000958.hg		8.8511	0.749464	1.48254	-3.85304	0.810099	23.162	0 .	16 x 45
TC16002103.hg	1041	TC16002103.hg	SMG1	9.81003	0.612889	1.48231	-1.42296	0.823751	24.3559	0 .	14 x 45	16 p12	SMG1 nonsense mediated mRNA decay associated PI3K related kinase
TC0X001739.hg	1042	TC0X001739.hg	ZC3H12B	4.42504	0.526395	1.47981	-1.25779	0.448991	8.42324	8.88178419700125e-16 .	6 x 45	X q11	zinc finger CCCH-type containing 12B
TC19001221.hg	1043	TC19001221.hg		9.27648	0.692136	1.47903	-1.91793	0.89589	33.8031	0 .	16 x 45
TC13000022.hg	1044	TC13000022.hg		4.95759	0.502033	1.47836	-1.12513	0.770948	20.2912	0 .	11 x 45
TC07000447.hg	1045	TC07000447.hg	CLDN4	7.08876	0.51668	1.47826	-1.61425	0.238114	4.10973	2.60139978731644e-05 .	3 x 44	7 q11	claudin 4
TC10002525.hg	1046	TC10002525.hg		5.45506	0.440587	1.47787	-1.08202	0.625046	13.4228	0 .	8 x 45
TC18000325.hg	1047	TC18000325.hg		8.73343	0.507309	1.47687	-1.35709	0.775379	20.5824	0 .	14 x 43	18 p11	nuclear pore complex interacting protein family member B1, pseudogene
TC01005212.hg	1048	TC01005212.hg	SLC35E2A	6.44422	0.579966	1.47587	-1.58554	0.621208	13.2883	0 .	8 x 45	1 p36	solute carrier family 35 member E2A
TC16000999.hg	1049	TC16000999.hg	SMG1	9.98054	0.638801	1.47488	-1.40995	0.833991	25.3367	0 .	15 x 45	16 p12	SMG1 nonsense mediated mRNA decay associated PI3K related kinase
TC12001726.hg	1050	TC12001726.hg	ZFC3H1	7.78254	0.506311	1.47465	-1.5105	0.76556	19.9469	0 .	12 x 43	12 q21	zinc finger C3H1-type containing
TC05001224.hg	1051	TC05001224.hg		5.37448	0.600169	1.47391	-1.35217	0.8426	26.2274	0 .	16 x 45
TC03001855.hg	1052	TC03001855.hg		3.73265	0.556575	1.47303	-1.21265	0.773433	20.4536	0 .	14 x 43	3 q23	novel transcript, sense overlapping to ATR
TC02001801.hg	1053	TC02001801.hg		7.5821	0.715231	1.47256	-1.4571	0.887663	32.313	0 .	15 x 45
TC06003225.hg	1054	TC06003225.hg		3.75112	0.588004	1.47066	-1.29844	0.749585	18.9835	0 .	14 x 44
TC13000892.hg	1055	TC13000892.hg	PCID2	7.14187	0.517624	1.46915	-1.22689	0.670496	15.1494	0 .	7 x 45	13 q34	PCI domain containing 2
TC07002229.hg	1056	TC07002229.hg	PLEKHA8	7.02979	0.500019	1.46799	-1.4662	0.581342	11.9769	0 .	6 x 44	7 p14	pleckstrin homology domain containing A8
TC10000286.hg	1057	TC10000286.hg		5.80192	0.681435	1.46777	-1.56898	0.867755	29.2685	0 .	16 x 45
TC04000755.hg	1058	TC04000755.hg		6.59153	0.622239	1.46757	-2.24471	0.855813	27.7333	0 .	16 x 45
TC13000926.hg	1059	TC13000926.hg		5.29391	0.509927	1.46709	-1.00815	0.777758	20.7419	0 .	12 x 45
TC17002272.hg	1060	TC17002272.hg	LUC7L3	5.58029	0.655311	1.46691	-1.52221	0.827094	24.6674	0 .	14 x 45	17 q21	LUC7 like 3 pre-mRNA splicing factor
TC09001181.hg	1061	TC09001181.hg		6.65426	0.480045	1.46685	-1.31163	0.853812	27.4933	0 .	10 x 45
TC16001834.hg	1062	TC16001834.hg		9.58748	0.613881	1.46611	-1.42737	0.824843	24.4567	0 .	14 x 45	16 p11	SMG1 pseudogene 5
TC13001031.hg	1063	TC13001031.hg	COG6	7.50158	0.547719	1.46594	-1.81116	0.457083	8.6147	2.22044604925031e-16 .	5 x 45	13 q14	component of oligomeric golgi complex 6
TC16001942.hg	1064	TC16001942.hg	LOC107984138	7.7176	0.645251	1.46566	-1.68417	0.853451	27.4504	0 .	15 x 45	16 q22	SMG1 pseudogene 7
TC07000728.hg	1065	TC07000728.hg	LSM8	7.01605	0.428208	1.46511	-1.1592	0.751524	19.0961	0 .	7 x 45	7 q31	LSM8 homolog, U6 small nuclear RNA associated
TC14000189.hg	1066	TC14000189.hg		4.95819	0.533448	1.46449	-1.72518	0.845189	26.5086	0 .	16 x 44
TC06003752.hg	1067	TC06003752.hg		4.35005	0.448308	1.46446	-1.16836	0.655058	14.5329	0 .	8 x 45
TC0X000061.hg	1068	TC0X000061.hg	OFD1	6.72703	0.484481	1.46432	-1.28256	0.707799	16.7959	0 .	8 x 44	X p22	OFD1 centriole and centriolar satellite protein
TC20000208.hg	1069	TC20000208.hg	POFUT1	8.08988	0.655652	1.46268	-1.39942	0.342837	6.11776	1.58701896069147e-09 .	4 x 44	20 q11	protein O-fucosyltransferase 1
TC03002282.hg	1070	TC03002282.hg		5.18777	0.639309	1.46146	-1.45154	0.686739	15.8368	0 .	15 x 44
TC06003146.hg	1071	TC06003146.hg		4.44884	0.565168	1.45876	-1.46923	0.792932	21.8148	0 .	16 x 44
TC04000834.hg	1072	TC04000834.hg		8.89681	0.715296	1.45741	-4.05701	0.782416	21.0607	0 .	16 x 45
TC16001626.hg	1073	TC16001626.hg	IST1	5.10094	0.526999	1.45723	-1.34606	0.564132	11.453	0 .	7 x 45	16 q22	IST1 factor associated with ESCRT-III
TC02001139.hg	1074	TC02001139.hg	SLC39A10	7.36581	0.539791	1.45547	-2.14942	0.317456	5.61181	2.39899249354636e-08 .	5 x 45	2 q32	solute carrier family 39 member 10
TC06000014.hg	1075	TC06000014.hg		7.97209	0.382103	1.45537	-0.784106	0.812932	23.4	0 .	10 x 43	6 p25	GMDS divergent transcript
TC02001711.hg	1076	TC02001711.hg		6.10195	0.610758	1.45357	-1.68683	0.818557	23.8873	0 .	17 x 45
TC16001832.hg	1077	TC16001832.hg		9.59007	0.633325	1.45336	-1.56523	0.847599	26.7761	0 .	15 x 45	16 p11	SMG1 pseudogene 6
TC13001294.hg	1078	TC13001294.hg	NAXD	7.58121	0.445031	1.45134	-0.884332	0.334953	5.95905	3.78903475262149e-09 .	6 x 45	13 q34	NAD(P)HX dehydratase
TC01001275.hg	1079	TC01001275.hg		5.86277	0.654619	1.45116	-2.44691	0.773781	20.4766	0 .	17 x 45	7 p14	RNA, U7 small nuclear 35 pseudogene
TC15001058.hg	1080	TC15001058.hg		8.20276	0.513417	1.45037	-1.25535	0.765111	19.9187	0 .	14 x 43	15 q11	hect domain and RLD 2 pseudogene 2
TC10002230.hg	1081	TC10002230.hg	ZNF518A	6.59821	0.490189	1.44958	-1.02009	0.732168	18.0193	0 .	8 x 45	10 q24	zinc finger protein 518A
TC16000944.hg	1082	TC16000944.hg	SMG1	11.0815	0.633717	1.44795	-1.70522	0.775392	20.5833	0 .	14 x 45	16 p12	SMG1 nonsense mediated mRNA decay associated PI3K related kinase
TC16001001.hg	1083	TC16001001.hg	SMG1	11.0815	0.633717	1.44795	-1.70522	0.775392	20.5833	0 .	14 x 45	16 p12	SMG1 nonsense mediated mRNA decay associated PI3K related kinase
TC02001877.hg	1084	TC02001877.hg		7.84229	0.667468	1.44565	-1.60321	0.896793	33.9766	0 .	15 x 45
TC07000797.hg	1085	TC07000797.hg	AHCYL2	3.89039	0.581322	1.44491	-1.3112	0.800598	22.3973	0 .	15 x 45	7 q32	adenosylhomocysteinase like 2
TC13000220.hg	1086	TC13000220.hg	UTP14C	7.09305	0.464257	1.44376	-1.03997	0.556872	11.2387	0 .	6 x 45	13 q14	UTP14C small subunit processome component
TC13000152.hg	1087	TC13000152.hg	AKAP11	8.16037	0.490978	1.44361	-1.58961	0.549583	11.0274	0 .	6 x 45	13 q14	A-kinase anchoring protein 11
TC09002683.hg	1088	TC09002683.hg		3.90398	0.539257	1.44312	-1.18151	0.844667	26.4513	0 .	13 x 45
TC06000130.hg	1089	TC06000130.hg		5.80108	0.515135	1.44192	-1.22054	0.753949	19.2386	0 .	13 x 44	6 p22	E2F3 intronic transcript 1
TC20000908.hg	1090	TC20000908.hg	ZMYND8	7.5992	0.536919	1.44134	-1.57796	0.492851	9.49495	0 .	4 x 45	20 q13	zinc finger MYND-type containing 8
TC06001958.hg	1091	TC06001958.hg		6.64062	0.653745	1.44101	-1.85877	0.784176	21.1835	0 .	17 x 45
TC13001465.hg	1092	TC13001465.hg	NUFIP1	7.10906	0.502175	1.44093	-1.43916	0.251904	4.36339	9.00321727281828e-06 .	5 x 45	13 q14	novel transcript
TC22000897.hg	1093	TC22000897.hg		9.63396	0.699816	1.4408	-1.78843	0.889913	32.7048	0 .	16 x 45
TC22000322.hg	1094	TC22000322.hg	FAM83F	6.07942	0.601001	1.44033	-2.45495	0.458709	8.65348	2.22044604925031e-16 .	3 x 45	22 q13	family with sequence similarity 83 member F
TC22001116.hg	1095	TC22001116.hg	FAM83F	6.07942	0.601001	1.44033	-2.45495	0.458709	8.65348	2.22044604925031e-16 .	3 x 45	22 q13	family with sequence similarity 83 member F
TC10001229.hg	1096	TC10001229.hg		7.01888	0.434989	1.44006	-1.08072	0.826601	24.6209	0 .	12 x 43	10 q11	poly(ADP-ribose) glycohydrolase pseudogene 1
TC06000129.hg	1097	TC06000129.hg		9.68088	0.690455	1.43888	-1.75603	0.889111	32.5639	0 .	15 x 45
TC0X001246.hg	1098	TC0X001246.hg		4.51507	0.67986	1.43436	-1.72294	0.849091	26.9445	0 .	16 x 45
TC16001943.hg	1099	TC16001943.hg	SMG1	9.75957	0.599028	1.43332	-1.53492	0.835161	25.454	0 .	15 x 45	16 p12	SMG1 nonsense mediated mRNA decay associated PI3K related kinase
TC01003492.hg	1100	TC01003492.hg		4.95449	0.562854	1.43233	-1.44865	0.791727	21.7258	0 .	17 x 45
TC10001741.hg	1101	TC10001741.hg		7.66736	0.65455	1.43137	-2.94715	0.849972	27.0451	0 .	16 x 45
TC01003634.hg	1102	TC01003634.hg		9.31472	0.611747	1.4313	-2.29978	0.822757	24.2648	0 .	17 x 45
TC07003351.hg	1103	TC07003351.hg	HOXA3	6.88379	0.499985	1.43063	-1.09064	0.278839	4.86723	9.44872398545016e-07 .	5 x 45	7 p15	homeobox A3
TC16001231.hg	1104	TC16001231.hg	SMG1	9.79863	0.592107	1.4301	-1.38959	0.836349	25.5743	0 .	14 x 45	16 p12	SMG1 nonsense mediated mRNA decay associated PI3K related kinase
TC10000710.hg	1105	TC10000710.hg		4.74356	0.660317	1.4299	-1.88041	0.715362	17.1615	0 .	17 x 45
TC15002437.hg	1106	TC15002437.hg	HERC2	8.23891	0.51422	1.42963	-1.22751	0.77622	20.6385	0 .	14 x 43	15 q11	hect domain and RLD 2 pseudogene 3
TC08001341.hg	1107	TC08001341.hg		6.92424	0.569276	1.42786	-1.6896	0.763091	19.7925	0 .	9 x 45	8 q21	cancer susceptibility 9
TC07002180.hg	1108	TC07002180.hg	RPL21	11.2101	0.509262	1.42771	-1.5367	0.251598	4.35772	9.22411667192424e-06 .	5 x 45	7 p21	ribosomal protein L21 pseudogene 75
TC03001623.hg	1109	TC03001623.hg		7.91229	0.697812	1.42749	-3.12648	0.825467	24.5147	0 .	16 x 45
TC16001025.hg	1110	TC16001025.hg		9.64389	0.631109	1.42637	-1.45069	0.831132	25.0547	0 .	15 x 45	16 p12	SMG1 pseudogene 1
TC0X000860.hg	1111	TC0X000860.hg		9.25935	0.710629	1.42528	-2.1925	0.882289	31.4205	0 .	16 x 45
TC12002916.hg	1112	TC12002916.hg		4.96915	0.583544	1.42525	-1.13013	0.823419	24.3253	0 .	15 x 45
TC07002622.hg	1113	TC07002622.hg		6.97856	0.640951	1.42465	-1.72005	0.342537	6.1117	1.64113767020524e-09 .	3 x 45	7 q34	KDM7A divergent transcript
TC13000126.hg	1114	TC13000126.hg	RFXAP	5.31828	0.56278	1.42455	-1.52776	0.621418	13.2956	0 .	6 x 45	13 q13	regulatory factor X associated protein
TC16002042.hg	1115	TC16002042.hg	NPIPA3	9.48473	0.512794	1.42335	-1.30774	0.77613	20.6325	0 .	14 x 43	CHR_HSCHR16_1_CTG1 p13	nuclear pore complex interacting protein family member A3
TC04000831.hg	1116	TC04000831.hg		9.83032	0.681155	1.4228	-2.60761	0.780092	20.9005	0 .	17 x 45
TC0X000221.hg	1117	TC0X000221.hg		5.26008	0.583292	1.42039	-1.64959	0.853098	27.4088	0 .	16 x 45
TC13000091.hg	1118	TC13000091.hg	POMP	9.02262	0.468355	1.419	-1.26754	0.310296	5.47158	4.93795397904506e-08 .	5 x 45	13 q12	proteasome maturation protein
TC17001177.hg	1119	TC17001177.hg	UPF3A	7.60295	0.447205	1.41889	-0.992371	0.462868	8.75322	1.11022302462516e-16 .	7 x 45	17 p11	UPF3A pseudogene 1
TC15001890.hg	1120	TC15001890.hg		6.22596	0.62449	1.4186	-2.75648	0.79777	22.1789	0 .	17 x 45
TC10002600.hg	1121	TC10002600.hg		7.30809	0.434456	1.41851	-1.08168	0.830061	24.9508	0 .	12 x 43	10 q11	poly(ADP-ribose) glycohydrolase pseudogene 1
TC16001792.hg	1122	TC16001792.hg		5.73552	0.569387	1.41822	-1.21044	0.786231	21.3286	0 .	14 x 44
TC02004778.hg	1123	TC02004778.hg	ORC2	7.64772	0.550829	1.41768	-1.64936	0.637015	13.8526	0 .	5 x 44	2 q33	origin recognition complex subunit 2
TC09000098.hg	1124	TC09000098.hg		8.49078	0.71043	1.41571	-1.72312	0.893412	33.3371	0 .	15 x 45
TC0X000388.hg	1125	TC0X000388.hg	OGT	8.86581	0.518256	1.41557	-1.37887	0.766712	20.0196	0 .	12 x 43	X q13	O-linked N-acetylglucosamine (GlcNAc) transferase
TC16001509.hg	1126	TC16001509.hg		7.7923	0.545236	1.41536	-1.33191	0.779892	20.8869	0 .	13 x 43	16 p11	hect domain and RLD 2 pseudogene 4
TC16000508.hg	1127	TC16000508.hg		3.60777	0.592539	1.41372	-1.23582	0.863502	28.7005	0 .	16 x 45
TC13000436.hg	1128	TC13000436.hg	UPF3A	7.65563	0.466418	1.41203	-1.0382	0.548574	10.9984	0 .	7 x 45	13 q34	UPF3A regulator of nonsense mediated mRNA decay
TC09000308.hg	1129	TC09000308.hg		7.23424	0.461302	1.41177	-1.32019	0.829914	24.9365	0 .	9 x 45
TC07000955.hg	1130	TC07000955.hg		5.82625	0.512701	1.40812	-1.40253	0.362455	6.51915	1.63425384336335e-10 .	7 x 44	7 q35	olfactory receptor family 2 subfamily A member 9 pseudogene
TC03001108.hg	1131	TC03001108.hg		8.21782	0.550042	1.40702	-1.34015	0.75018	19.0179	0 .	12 x 44	3 q29	novel transcript
TC0X000982.hg	1132	TC0X000982.hg		8.45898	0.650514	1.40663	-1.4547	0.866936	29.1571	0 .	16 x 45
TC06001979.hg	1133	TC06001979.hg		7.53776	0.692987	1.40584	-1.70204	0.879489	30.9778	0 .	16 x 45
TC13000689.hg	1134	TC13000689.hg	VPS36	7.52454	0.517416	1.4053	-1.1042	0.649334	14.3126	0 .	6 x 45	13 q14	vacuolar protein sorting 36 homolog
TC03001254.hg	1135	TC03001254.hg		6.43897	0.555274	1.40496	-1.75227	0.799638	22.3227	0 .	17 x 45
TC05001142.hg	1136	TC05001142.hg		8.52656	0.623861	1.40455	-1.51363	0.812384	23.3536	0 .	14 x 45	4 q32	microRNA 4454
TC17002544.hg	1137	TC17002544.hg		6.68059	0.461993	1.4033	-1.06562	0.438836	8.18663	4.66293670342566e-15 .	6 x 45	17 p11	UPF3A pseudogene 2
TC0X002040.hg	1138	TC0X002040.hg	CASK	6.88275	0.650351	1.4023	-1.98886	0.191828	3.27648	0.000591517975269018 .	3 x 45	X p11	calcium/calmodulin dependent serine protein kinase
TC07000520.hg	1139	TC07000520.hg	DMTF1	7.20352	0.473564	1.40149	-1.29372	0.788091	21.4615	0 .	16 x 43	7 q21	cyclin D binding myb like transcription factor 1
TC13000356.hg	1140	TC13000356.hg	TM9SF2	9.68324	0.520509	1.40092	-1.50413	0.286312	5.00917	4.83773972881352e-07 .	5 x 45	13 q32	transmembrane 9 superfamily member 2
TC16000970.hg	1141	TC16000970.hg	CCDC141	5.66648	0.618216	1.3985	-2.15814	0.779314	20.8474	0 .	17 x 45	2 q31	coiled-coil domain containing 141
TC13000419.hg	1142	TC13000419.hg	CUL4A	8.28275	0.440748	1.39795	-0.97369	0.49898	9.65185	0 .	6 x 45	13 q34	cullin 4A
TC02001732.hg	1143	TC02001732.hg		5.69898	0.654442	1.39777	-1.63802	0.840611	26.0158	0 .	15 x 45	2 p22	novel transcript
TC07001181.hg	1144	TC07001181.hg		4.45745	0.465537	1.39772	-1.04877	0.691505	16.0468	0 .	7 x 44
TC20000708.hg	1145	TC20000708.hg	NAPB	5.98543	0.462836	1.39738	-0.910614	0.667885	15.0428	0 .	9 x 44	20 p11	NSF attachment protein beta
TC09001933.hg	1146	TC09001933.hg	CBWD2	7.74752	0.507048	1.39684	-1.69742	0.783168	21.113	0 .	8 x 45	2 q14	COBW domain containing 2
TC07003159.hg	1147	TC07003159.hg	RBM28	6.09685	0.508642	1.39526	-1.79431	0.467653	8.86886	0 .	6 x 44	7 q32	RNA binding motif protein 28
TC09001027.hg	1148	TC09001027.hg		5.53952	0.615843	1.39488	-1.69872	0.791134	21.6823	0 .	16 x 45
TC02000953.hg	1149	TC02000953.hg		3.99454	0.58192	1.39434	-1.49407	0.827271	24.6841	0 .	17 x 45
TC15001479.hg	1150	TC15001479.hg		7.44177	0.612931	1.39433	-1.99478	0.818221	23.8577	0 .	17 x 45
TC22001192.hg	1151	TC22001192.hg	KCNMB3	4.89412	0.439911	1.39387	-0.978091	0.673416	15.2699	0 .	9 x 44	22 q11	potassium calcium-activated channel subfamily M regulatory beta subunit 3 pseudogene 1
TC16001839.hg	1152	TC16001839.hg		8.94124	0.613533	1.39308	-1.56614	0.836279	25.5672	0 .	15 x 45	16 p11	SMG1 pseudogene 5
TC06000523.hg	1153	TC06000523.hg	MAPK14	7.42228	0.413927	1.39287	-0.780413	0.509372	9.92234	0 .	6 x 45	6 p21	mitogen-activated protein kinase 14
TC03003293.hg	1154	TC03003293.hg		8.04033	0.52088	1.39166	-1.22589	0.826268	24.5896	0 .	12 x 44
TC01001073.hg	1155	TC01001073.hg		4.98888	0.514907	1.39006	-1.23783	0.854335	27.5555	0 .	16 x 43
TC18000451.hg	1156	TC18000451.hg		5.23034	0.586031	1.38811	-1.58569	0.814785	23.5584	0 .	17 x 45
TC16001953.hg	1157	TC16001953.hg		4.48157	0.41338	1.38768	-0.679915	0.696063	16.2514	0 .	8 x 43	16 q22	long intergenic non-protein coding RNA 1572
TC08001427.hg	1158	TC08001427.hg	RBM12B	7.09433	0.487893	1.38692	-1.15113	0.817905	23.8298	0 .	10 x 45	8 q22	RNA binding motif protein 12B
TC0X001396.hg	1159	TC0X001396.hg	FAM122B	7.02504	0.508992	1.38635	-1.64609	0.58678	12.1473	0 .	6 x 44	X q26	family with sequence similarity 122B
TC02002593.hg	1160	TC02002593.hg		6.5527	0.475063	1.38617	-1.23653	0.75823	19.4946	0 .	12 x 43	2 q32
TC16001230.hg	1161	TC16001230.hg	LOC107984138	7.63826	0.606165	1.38584	-1.42811	0.855055	27.6419	0 .	15 x 45	16 q22	SMG1 pseudogene 7
TC06002504.hg	1162	TC06002504.hg	PRPF4B	4.9994	0.477175	1.38485	-0.936978	0.804071	22.671	0 .	12 x 43	6 p25	pre-mRNA processing factor 4B
TC13000137.hg	1163	TC13000137.hg	COG6	7.049	0.489469	1.38337	-1.44918	0.476787	9.09242	0 .	5 x 45	13 q14	component of oligomeric golgi complex 6
TC12001504.hg	1164	TC12001504.hg		5.66397	0.528731	1.38241	-1.48722	0.784123	21.1798	0 .	16 x 43	12 q13
TC07001907.hg	1165	TC07001907.hg	KIAA1549	7.00488	0.52808	1.38236	-1.52387	0.347009	6.20233	9.91485671342218e-10 .	3 x 44	7 q34	KIAA1549
TC12002017.hg	1166	TC12002017.hg	VSIG10	7.22741	0.491282	1.38233	-1.58982	0.411171	7.56121	2.8466118351389e-13 .	4 x 44	12 q24	V-set and immunoglobulin domain containing 10
TC07000965.hg	1167	TC07000965.hg		9.17732	0.737625	1.38197	-3.58291	0.755152	19.31	0 .	16 x 45
TC04000862.hg	1168	TC04000862.hg		10.4827	0.621569	1.38085	-2.54141	0.817568	23.8002	0 .	17 x 45
TC07000090.hg	1169	TC07000090.hg	PHF14	6.75993	0.452342	1.37798	-1.21049	0.686365	15.8205	0 .	7 x 43	7 p21	PHD finger protein 14
TC13001497.hg	1170	TC13001497.hg	SPRYD7	7.12335	0.484151	1.37758	-1.17819	0.317284	5.60843	2.44144718886119e-08 .	5 x 44	13 q14	SPRY domain containing 7
TC02002449.hg	1171	TC02002449.hg		4.88204	0.595087	1.37531	-1.66599	0.855324	27.6742	0 .	16 x 45
TC13000922.hg	1172	TC13000922.hg		5.48551	0.491195	1.37489	-1.3176	0.323631	5.73362	1.26738565198181e-08 .	5 x 45	13 q12	poly(ADP-ribose) polymerase family member 4 pseudogene 2
TC03001191.hg	1173	TC03001191.hg		7.6595	0.69377	1.37283	-1.70072	0.867625	29.2507	0 .	16 x 45
TC13000843.hg	1174	TC13000843.hg	TMTC4	7.31184	0.538378	1.37223	-1.25427	0.514509	10.0582	0 .	4 x 45	13 q32	transmembrane O-mannosyltransferase targeting cadherins 4
TC01006178.hg	1175	TC01006178.hg		4.04802	0.471519	1.37221	-1.21578	0.514307	10.0528	0 .	6 x 44	1 q42	novel transcript
TC17000675.hg	1176	TC17000675.hg	LUC7L3	7.57867	0.50848	1.36944	-1.37746	0.793095	21.8269	0 .	13 x 43	17 q21	LUC7 like 3 pre-mRNA splicing factor
TC13000661.hg	1177	TC13000661.hg	RCBTB1	7.25852	0.388473	1.36902	-0.977876	0.504399	9.79218	0 .	7 x 45	13 q14	RCC1 and BTB domain containing protein 1
TC20000132.hg	1178	TC20000132.hg		8.93599	0.66963	1.36887	-2.94803	0.841421	26.1016	0 .	16 x 45
TC04001658.hg	1179	TC04001658.hg		9.52799	0.676936	1.36814	-2.01112	0.884004	31.699	0 .	16 x 45
TC13000678.hg	1180	TC13000678.hg	INTS6	6.6439	0.355016	1.36789	-0.966503	0.527283	10.4025	0 .	6 x 45	13 q14	integrator complex subunit 6
TC09000005.hg	1181	TC09000005.hg		6.28102	0.444153	1.36775	-0.972435	0.600693	12.595	0 .	7 x 45
TC06000964.hg	1182	TC06000964.hg	TRMT11	6.5217	0.467954	1.36731	-1.02941	0.687716	15.8795	0 .	11 x 43	6 q22	tRNA methyltransferase 11 homolog
TC13000919.hg	1183	TC13000919.hg		9.20348	0.544448	1.36591	-1.84065	0.312305	5.51082	4.04034066203707e-08 .	4 x 45	13 q12	poly(ADP-ribose) polymerase family member 4 pseudogene 2
TC09000864.hg	1184	TC09000864.hg		6.93045	0.433776	1.36431	-1.14711	0.850027	27.0514	0 .	9 x 44
TC03001607.hg	1185	TC03001607.hg		10.7572	0.61555	1.36334	-2.754	0.8187	23.9	0 .	17 x 45
TC07000538.hg	1186	TC07000538.hg		3.16288	0.521749	1.36187	-1.53614	0.802509	22.5471	0 .	16 x 43
TC07002073.hg	1187	TC07002073.hg	LMBR1	7.99904	0.48957	1.36064	-1.25028	0.49077	9.44211	0 .	5 x 44	7 q36	limb development membrane protein 1
TC02000725.hg	1188	TC02000725.hg		6.79346	0.456096	1.3597	-1.22385	0.835422	25.4803	0 .	9 x 45
TC17001840.hg	1189	TC17001840.hg		6.63778	0.559253	1.35932	-1.44475	0.411619	7.57113	2.67119659724813e-13 .	3 x 45	17 q24	long intergenic non-protein coding RNA 511
TC17001669.hg	1190	TC17001669.hg		9.05176	0.683022	1.35692	-1.67386	0.878768	30.8662	0 .	16 x 45
TC02004337.hg	1191	TC02004337.hg		6.10172	0.479505	1.35673	-1.88471	0.717625	17.2732	0 .	9 x 45	2 p13	TEC
TC13000827.hg	1192	TC13000827.hg		9.29468	0.689033	1.35662	-3.40342	0.858628	28.0789	0 .	16 x 45
TC06001093.hg	1193	TC06001093.hg	IYD	6.15768	0.552091	1.35472	-1.30268	0.324907	5.75887	1.10892521831829e-08 .	5 x 44	6 q25	iodotyrosine deiodinase
TC01001741.hg	1194	TC01001741.hg	CD46	9.08707	0.554797	1.35179	-1.76126	0.631877	13.6661	0 .	4 x 45	1 q32	CD46 molecule
TC13001250.hg	1195	TC13001250.hg	UBAC2	8.50542	0.449129	1.35157	-1.31426	0.311955	5.50398	4.18445382788235e-08 .	5 x 45	13 q32	UBA domain containing 2
TC06000061.hg	1196	TC06000061.hg	SNRNP48	6.13652	0.413397	1.35057	-1.02705	0.726609	17.7282	0 .	8 x 44	6 p24	small nuclear ribonucleoprotein U11/U12 subunit 48
TC19000343.hg	1197	TC19000343.hg	B3GNT3	8.33573	0.501989	1.34922	-1.58538	0.168958	2.87357	0.00218419793723945 .	3 x 44	19 p13	UDP-GlcNAc:betaGal beta-1,3-N-acetylglucosaminyltransferase 3
TC01000824.hg	1198	TC01000824.hg		3.62391	0.524918	1.3485	-1.37134	0.844857	26.4721	0 .	17 x 45
TC02000786.hg	1199	TC02000786.hg	MYO7B	7.66557	0.491844	1.34747	-1.36144	0.273969	4.77526	1.44639961474624e-06 .	3 x 45	2 q14	myosin VIIB
TC09000194.hg	1200	TC09000194.hg		3.81538	0.443117	1.34716	-1.09193	0.600779	12.5978	0 .	8 x 43	9 p13	novel transcript
TC06000997.hg	1201	TC06000997.hg		7.00328	0.521814	1.3459	-1.62442	0.670694	15.1576	0 .	10 x 45	6 q23	small nucleolar RNA, C/D box 100
TC13000112.hg	1202	TC13000112.hg	PDS5B	8.17656	0.478973	1.34541	-1.32431	0.4995	9.66525	0 .	6 x 45	13 q13	PDS5 cohesin associated factor B
TC02002669.hg	1203	TC02002669.hg	ORC2	6.77903	0.498518	1.34038	-1.41401	0.674831	15.3288	0 .	5 x 44	2 q33	origin recognition complex subunit 2
TC0X000930.hg	1204	TC0X000930.hg		5.8335	0.508902	1.33993	-1.28944	0.797737	22.1764	0 .	17 x 44
TC07000265.hg	1205	TC07000265.hg		9.305	0.691938	1.33908	-1.75714	0.864288	28.8035	0 .	16 x 45
TC04001574.hg	1206	TC04001574.hg		4.88512	0.564471	1.33639	-1.89222	0.76962	20.2054	0 .	17 x 45
TC19001366.hg	1207	TC19001366.hg	ZNF91	7.78383	0.492235	1.33619	-1.41078	0.500445	9.68964	0 .	6 x 44	19 p12	zinc finger protein 91
TC06002993.hg	1208	TC06002993.hg		5.13444	0.424503	1.33523	-0.886002	0.825838	24.5494	0 .	9 x 45
TC13000209.hg	1209	TC13000209.hg	RNASEH2B	6.34947	0.418063	1.33521	-1.09116	0.450412	8.45666	7.7715611723761e-16 .	6 x 45	13 q14	ribonuclease H2 subunit B
TC02000431.hg	1210	TC02000431.hg		6.3517	0.51309	1.33341	-1.10935	0.815477	23.6181	0 .	17 x 44	2 p13	novel transcript
TC0X000969.hg	1211	TC0X000969.hg	CASK	8.25552	0.598576	1.33162	-2.28919	0.433993	8.07516	9.99200722162641e-15 .	3 x 44	X p11	calcium/calmodulin dependent serine protein kinase
TC03000557.hg	1212	TC03000557.hg		7.19241	0.661095	1.33072	-2.03154	0.859551	28.1943	0 .	16 x 45
TC01003892.hg	1213	TC01003892.hg	TMEM63A	8.8435	0.541233	1.33047	-1.54171	0.599861	12.5677	0 .	4 x 45	1 q42	transmembrane protein 63A
TC05002971.hg	1214	TC05002971.hg		6.39863	0.440965	1.33014	-1.22946	0.3465	6.19199	1.0504377367937e-09 .	6 x 45	5 p13	integrator complex subunit 6 pseudogene 1
TC03000824.hg	1215	TC03000824.hg		10.2927	0.658293	1.32945	-3.11998	0.769925	20.2251	0 .	17 x 45
TC04002164.hg	1216	TC04002164.hg		9.57598	0.56331	1.32893	-1.53938	0.796171	22.0573	0 .	13 x 43	1 q41	novel transcript
TC11002331.hg	1217	TC11002331.hg		3.83688	0.48657	1.32828	-1.12927	0.847531	26.7684	0 .	16 x 43
TC13001723.hg	1218	TC13001723.hg		6.77751	0.515174	1.32688	-1.33255	0.714826	17.1352	0 .	9 x 45
TC07001930.hg	1219	TC07001930.hg	DENND11	7.5371	0.428488	1.32687	-0.895457	0.450365	8.45556	7.7715611723761e-16 .	6 x 44	CHR_HSCHR7_1_CTG6 q34	DENN domain containing 11
TC02004829.hg	1220	TC02004829.hg	FARSB	4.49923	0.396946	1.32597	-1.03651	0.528726	10.442	0 .	7 x 43	2 q36	phenylalanyl-tRNA synthetase subunit beta
TC16001952.hg	1221	TC16001952.hg		4.41071	0.391828	1.32534	-0.726688	0.677657	15.4473	0 .	9 x 43
TC13000168.hg	1222	TC13000168.hg	GPALPP1	6.53238	0.423704	1.32519	-0.908261	0.60839	12.8503	0 .	6 x 45	13 q14	GPALPP motifs containing 1
TC02001731.hg	1223	TC02001731.hg		6.88301	0.604821	1.32432	-2.51801	0.856065	27.7639	0 .	16 x 45
TC03000120.hg	1224	TC03000120.hg	HMGB1	10.4803	0.494647	1.32405	-1.20472	0.504164	9.78608	0 .	5 x 45	15 q23	high mobility group box 1 pseudogene 6
TC06001184.hg	1225	TC06001184.hg	AFDN	8.20648	0.535297	1.32241	-2.02756	0.663646	14.8717	0 .	4 x 44	6 q27	afadin, adherens junction formation factor
TC03001553.hg	1226	TC03001553.hg		4.66593	0.520242	1.322	-1.53144	0.844372	26.4191	0 .	16 x 44
TC01002292.hg	1227	TC01002292.hg		5.05871	0.598479	1.32181	-2.44455	0.779358	20.8504	0 .	16 x 45	1 p36	microRNA 1290
TC13000453.hg	1228	TC13000453.hg	PSPC1	7.06908	0.401695	1.3196	-1.06965	0.69612	16.2539	0 .	7 x 45	13 q12	paraspeckle component 1
TC09001170.hg	1229	TC09001170.hg		7.04979	0.468271	1.31894	-1.26346	0.872148	29.8826	0 .	10 x 45
TC15001914.hg	1230	TC15001914.hg		2.66569	0.464815	1.31747	-1.19096	0.846197	26.6197	0 .	16 x 43
TC07000957.hg	1231	TC07000957.hg	ARHGEF5	7.83175	0.576663	1.31555	-1.56371	0.356489	6.39607	3.31701999201073e-10 .	3 x 45	7 q35	Rho guanine nucleotide exchange factor 5
TC20000850.hg	1232	TC20000850.hg	CHD6	7.43826	0.413913	1.31462	-1.02914	0.677075	15.4228	0 .	8 x 43	20 q12	chromodomain helicase DNA binding protein 6
TC0X000165.hg	1233	TC0X000165.hg		5.28811	0.511461	1.3139	-1.03496	0.818496	23.882	0 .	17 x 44
TC02000338.hg	1234	TC02000338.hg		5.0414	0.499374	1.31217	-1.63081	0.792078	21.7517	0 .	17 x 44
TC07000878.hg	1235	TC07000878.hg		7.01311	0.568649	1.31134	-1.56891	0.283467	4.95502	6.25651516594772e-07 .	3 x 45	7 q34	KDM7A divergent transcript
TC15000956.hg	1236	TC15000956.hg		5.08606	0.541678	1.30777	-1.39693	0.793134	21.8297	0 .	17 x 44
TC06003936.hg	1237	TC06003936.hg	TFB1M	3.77875	0.451595	1.3037	-0.953782	0.679717	15.5345	0 .	8 x 45	6 q25	transcription factor B1, mitochondrial
TC15001608.hg	1238	TC15001608.hg		3.82631	0.52724	1.30243	-1.8328	0.760951	19.6604	0 .	16 x 43	1 p13	long intergenic non-protein coding RNA 1762
TC13000491.hg	1239	TC13000491.hg	PARP4	9.77997	0.584275	1.30234	-1.74126	0.351158	6.28685	6.16726669733225e-10 .	4 x 45	13 q12	poly(ADP-ribose) polymerase family member 4
TC05001747.hg	1240	TC05001747.hg	C5orf63	5.78842	0.486913	1.29875	-1.73594	0.694169	16.1659	0 .	9 x 43	5 q23	chromosome 5 open reading frame 63
TC03001231.hg	1241	TC03001231.hg		8.51902	0.643033	1.29865	-2.55243	0.853289	27.4313	0 .	16 x 45
TC14000496.hg	1242	TC14000496.hg		8.84844	0.639574	1.29838	-2.37871	0.843163	26.2881	0 .	16 x 45
TC13000773.hg	1243	TC13000773.hg		7.30543	0.603132	1.29819	-2.37142	0.82668	24.6283	0 .	17 x 45
TC02000373.hg	1244	TC02000373.hg		9.1705	0.657152	1.29807	-1.61377	0.887903	32.3544	0 .	15 x 45
TC12001266.hg	1245	TC12001266.hg		4.29145	0.484546	1.29703	-1.12507	0.826832	24.6427	0 .	16 x 43
TC07001990.hg	1246	TC07001990.hg		10.4014	0.649753	1.29347	-2.61597	0.762047	19.7279	0 .	17 x 45
TC0X000613.hg	1247	TC0X000613.hg		8.62971	0.488077	1.29339	-1.19131	0.865941	29.0231	0 .	12 x 44	X q25	novel transcript
TC07000718.hg	1248	TC07000718.hg	TES	7.79109	0.524707	1.29324	-1.9667	0.418419	7.72248	1.00919272938427e-13 .	4 x 44	7 q31	testin LIM domain protein
TC09001470.hg	1249	TC09001470.hg		4.34864	0.586428	1.28923	-1.59278	0.786282	21.3322	0 .	17 x 45
TC12003251.hg	1250	TC12003251.hg	RAB3IP	7.06565	0.541964	1.28614	-1.74804	0.571191	11.6651	0 .	4 x 44	12 q15	RAB3A interacting protein
TC02000996.hg	1251	TC02000996.hg	CERS6	9.33104	0.632956	1.28517	-2.14896	0.415531	7.658	1.52988732793347e-13 .	3 x 45	2 q24	ceramide synthase 6
TC13001398.hg	1252	TC13001398.hg		6.01202	0.504393	1.28499	-1.09437	0.817631	23.8058	0 .	16 x 43
TC05001424.hg	1253	TC05001424.hg		5.51439	0.447187	1.28373	-1.1862	0.846587	26.6629	0 .	10 x 45	5 q13	novel transcript
TC20000805.hg	1254	TC20000805.hg	RBM39	8.47328	0.499779	1.28333	-1.15177	0.847829	26.8018	0 .	11 x 44	20 q11	RNA binding motif protein 39
TC03001071.hg	1255	TC03001071.hg	HES1	8.13295	0.582548	1.28296	-2.0864	0.100255	1.68908	0.0461562386624291 .	3 x 44	3 q29	hes family bHLH transcription factor 1
TC14001179.hg	1256	TC14001179.hg		4.82187	0.531175	1.28249	-1.54469	0.838164	25.7604	0 .	17 x 45
TC22000238.hg	1257	TC22000238.hg		3.51692	0.555292	1.28242	-1.27979	0.688992	15.9356	0 .	10 x 45
TC06002038.hg	1258	TC06002038.hg		7.79167	0.611608	1.2813	-2.61732	0.847839	26.803	0 .	16 x 45
TC06000706.hg	1259	TC06000706.hg		3.8	0.568539	1.28126	-1.86178	0.813423	23.4418	0 .	16 x 44
TC07001603.hg	1260	TC07001603.hg	CDK6	7.55747	0.473764	1.27923	-1.25328	0.305536	5.37894	7.89597502937056e-08 .	5 x 45	7 q21	cyclin dependent kinase 6
TC11003189.hg	1261	TC11003189.hg	C11orf95	5.88865	0.537339	1.27775	-1.68671	0.421924	7.80112	6.06181771445335e-14 .	7 x 45	11 q13	chromosome 11 open reading frame 95
TC03003309.hg	1262	TC03003309.hg		6.55111	0.495984	1.27739	-0.972947	0.807494	22.9473	0 .	12 x 43
TC02002516.hg	1263	TC02002516.hg		8.76706	0.500664	1.27508	-1.25611	0.463924	8.77864	0 .	5 x 45	2 q31	high mobility group box 1 pseudogene 4
TC02001119.hg	1264	TC02001119.hg	MFSD6	8.13155	0.567552	1.27436	-2.50868	0.426735	7.90974	2.97539770599542e-14 .	4 x 45	2 q32	major facilitator superfamily domain containing 6
TC02000520.hg	1265	TC02000520.hg	PTCD3	7.26185	0.476916	1.27424	-1.18516	0.664149	14.8919	0 .	7 x 43	2 p11	pentatricopeptide repeat domain 3
TC06000977.hg	1266	TC06000977.hg		9.26221	0.59829	1.27339	-2.3755	0.849536	26.9953	0 .	17 x 45
TC18000427.hg	1267	TC18000427.hg		6.78651	0.605129	1.27225	-1.36518	0.868554	29.3782	0 .	15 x 45
TC09000449.hg	1268	TC09000449.hg		4.55502	0.583558	1.27222	-1.18872	0.78931	21.5494	0 .	13 x 45
TC10000252.hg	1269	TC10000252.hg	ZNF33A	7.07926	0.42895	1.26968	-0.991171	0.630121	13.6031	0 .	7 x 45	10 p11	zinc finger protein 33A
TC20000417.hg	1270	TC20000417.hg		8.79083	0.644139	1.26869	-1.62066	0.83523	25.461	0 .	16 x 45
TC09001219.hg	1271	TC09001219.hg		4.37375	0.417758	1.26627	-0.96655	0.684739	15.7499	0 .	9 x 43	9 q21	novel transcript
TC03000123.hg	1272	TC03000123.hg		8.70119	0.605625	1.26366	-3.07835	0.846319	26.6332	0 .	16 x 45
TC01000083.hg	1273	TC01000083.hg		8.02433	0.586626	1.26326	-2.33296	0.857605	27.9522	0 .	16 x 45
TC09002234.hg	1274	TC09002234.hg		5.89751	0.445309	1.26079	-1.02346	0.554274	11.163	0 .	7 x 45	9 q33	cutA divalent cation tolerance homolog-like, pseudogene
TC06002101.hg	1275	TC06002101.hg		9.33279	0.613035	1.26025	-2.42466	0.847972	26.8179	0 .	17 x 45
TC09001222.hg	1276	TC09001222.hg		9.34201	0.601547	1.25744	-2.30989	0.84534	26.5251	0 .	16 x 45
TC04001118.hg	1277	TC04001118.hg		5.93305	0.607103	1.25743	-2.64439	0.828732	24.823	0 .	16 x 45
TC02004925.hg	1278	TC02004925.hg	TIA1	7.1851	0.503276	1.25528	-1.39095	0.853561	27.4635	0 .	10 x 45	2 p13	TIA1 cytotoxic granule associated RNA binding protein
TC03000411.hg	1279	TC03000411.hg		4.91339	0.510754	1.25509	-1.64827	0.801132	22.4389	0 .	17 x 44
TC06000905.hg	1280	TC06000905.hg		5.01609	0.43118	1.2537	-1.19133	0.715093	17.1483	0 .	9 x 43	6 q21	novel transcript
TC17000705.hg	1281	TC17000705.hg	MSI2	7.33573	0.50519	1.25202	-1.50696	0.576072	11.814	0 .	5 x 44	17 q22	musashi RNA binding protein 2
TC01000290.hg	1282	TC01000290.hg		3.55966	0.504878	1.24982	-1.06416	0.818937	23.921	0 .	17 x 44
TC13000757.hg	1283	TC13000757.hg		4.56991	0.565152	1.24935	-1.76437	0.799371	22.302	0 .	17 x 45
TC17001816.hg	1284	TC17001816.hg		5.73746	0.526716	1.2463	-1.35489	0.826743	24.6343	0 .	17 x 44	17 q24	microRNA 548d-2
TC16000554.hg	1285	TC16000554.hg	SLC7A6	7.91618	0.528399	1.24558	-2.65359	0.38491	6.99088	9.954703727999e-12 .	5 x 45	16 q22	solute carrier family 7 member 6
TC0X000904.hg	1286	TC0X000904.hg	BCLAF3	6.20481	0.395059	1.24399	-1.3114	0.639718	13.952	0 .	7 x 44	X p22	BCLAF1 and THRAP3 family member 3
TC06000135.hg	1287	TC06000135.hg	SOX4	9.23808	0.597316	1.24297	-2.30539	0.281999	4.92714	7.13603540258845e-07 .	3 x 45	6 p22	SRY-box transcription factor 4
TC6_dbb_hap3000230.hg	1288	TC6_dbb_hap3000230.hg		7.26899	0.367268	1.24272	-0.936687	0.692854	16.1069	0 .	8 x 44	6 p22	HLA complex group 18
TC6_qbl_hap6000229.hg	1289	TC6_qbl_hap6000229.hg		7.31071	0.370857	1.24262	-0.942952	0.698469	16.3609	0 .	7 x 45	6 p22	HLA complex group 18
TC6_mann_hap4000200.hg	1290	TC6_mann_hap4000200.hg		7.22146	0.349526	1.23958	-0.942893	0.699783	16.4211	0 .	8 x 44	6 p22	HLA complex group 18
TC06004144.hg	1291	TC06004144.hg		7.30423	0.369019	1.23821	-0.937433	0.696746	16.2823	0 .	8 x 44	6 p22	HLA complex group 18
TC01005886.hg	1292	TC01005886.hg	PIGM	5.85746	0.528993	1.2379	-1.46573	0.398217	7.27722	1.70929936871289e-12 .	6 x 45	1 q23	phosphatidylinositol glycan anchor biosynthesis class M
TC13001341.hg	1293	TC13001341.hg	PSPC1	8.58688	0.435509	1.23665	-1.37387	0.674154	15.3006	0 .	7 x 45	13 q12	paraspeckle component 1
TC6_apd_hap1000072.hg	1294	TC6_apd_hap1000072.hg		7.39202	0.354389	1.23532	-0.948727	0.679903	15.5424	0 .	8 x 44	6 p22	HLA complex group 18
TC02004990.hg	1295	TC02004990.hg	C2orf15	5.18345	0.480507	1.2353	-1.14262	0.370721	6.6912	5.98145977193099e-11 .	4 x 44	2 q11	chromosome 2 open reading frame 15
TC02001783.hg	1296	TC02001783.hg		5.96481	0.4829	1.23209	-1.39206	0.812661	23.377	0 .	17 x 44
TC07003231.hg	1297	TC07003231.hg	ACTR3B	6.35008	0.406478	1.23115	-0.919541	0.59747	12.4897	0 .	7 x 43	7 q36	actin related protein 3B
TC02001355.hg	1298	TC02001355.hg		4.39771	0.524877	1.23086	-1.6338	0.800769	22.4106	0 .	17 x 44
TC13000607.hg	1299	TC13000607.hg	VWA8	7.56801	0.450113	1.23036	-1.21005	0.503397	9.76612	0 .	6 x 45	13 q14	von Willebrand factor A domain containing 8
TC22000659.hg	1300	TC22000659.hg	DUSP18	6.65938	0.47368	1.22988	-1.31356	0.437711	8.16066	5.6621374255883e-15 .	5 x 45	22 q12	dual specificity phosphatase 18
TC12001722.hg	1301	TC12001722.hg		6.85108	0.419664	1.22907	-1.34087	0.808907	23.0633	0 .	10 x 44	12 q21	novel transcript
TC09002572.hg	1302	TC09002572.hg	CBWD1	10.0262	0.463272	1.22888	-1.21702	0.715101	17.1486	0 .	8 x 44	9 p24	COBW domain containing 1
TC02002659.hg	1303	TC02002659.hg	TYW5	5.7639	0.383657	1.22811	-0.875192	0.732353	18.0291	0 .	7 x 43	2 q33	tRNA-yW synthesizing protein 5
TC07001750.hg	1304	TC07001750.hg		6.61893	0.545856	1.22689	-1.53705	0.838223	25.7664	0 .	17 x 45
TC0X000885.hg	1305	TC0X000885.hg	CTPS2	7.36144	0.514466	1.22634	-1.57268	0.483791	9.26641	0 .	4 x 45	X p22	CTP synthase 2
TC06001112.hg	1306	TC06001112.hg		3.77367	0.463431	1.22462	-1.48171	0.863792	28.7384	0 .	16 x 43
TC16000202.hg	1307	TC16000202.hg	NPIPA3	9.26391	0.504857	1.22393	-1.75081	0.759162	19.5512	0 .	14 x 43	CHR_HSCHR16_1_CTG1 p13	nuclear pore complex interacting protein family member A3
TC16001204.hg	1308	TC16001204.hg		9.44514	0.601741	1.22304	-2.4259	0.851095	27.1745	0 .	17 x 45
TC04001013.hg	1309	TC04001013.hg		10.3584	0.62236	1.2211	-2.7711	0.768815	20.1537	0 .	17 x 45
TC6_cox_hap2000251.hg	1310	TC6_cox_hap2000251.hg		7.31832	0.368591	1.22002	-0.952624	0.696338	16.2638	0 .	8 x 44	6 p22	HLA complex group 18
TC12002426.hg	1311	TC12002426.hg	CAND1	5.32272	0.523301	1.21672	-1.19004	0.477447	9.10873	0 .	6 x 45	12 q14	cullin associated and neddylation dissociated 1
TC06002699.hg	1312	TC06002699.hg	ATAT1	6.66264	0.413614	1.21594	-0.792495	0.648352	14.2753	0 .	7 x 43	CHR_HSCHR6_MHC_COX_CTG1 p21	alpha tubulin acetyltransferase 1
TC13000534.hg	1313	TC13000534.hg		8.34311	0.429366	1.21526	-1.0599	0.60793	12.8349	0 .	6 x 45
TC14001163.hg	1314	TC14001163.hg		4.24825	0.488223	1.21489	-1.37208	0.845325	26.5235	0 .	16 x 43
TC06000891.hg	1315	TC06000891.hg	MFSD4B	4.96702	0.417766	1.21401	-0.997302	0.744175	18.6751	0 .	10 x 43	6 q21	major facilitator superfamily domain containing 4B
TC09001256.hg	1316	TC09001256.hg		8.00941	0.598821	1.21304	-2.192	0.837754	25.7181	0 .	17 x 45
TC04001040.hg	1317	TC04001040.hg		6.39963	0.491387	1.21141	-1.93207	0.805036	22.7483	0 .	17 x 44
TC07001843.hg	1318	TC07001843.hg	RBM28	6.3759	0.406856	1.20987	-1.06657	0.510127	9.9422	0 .	6 x 44	7 q32	RNA binding motif protein 28
TC06000344.hg	1319	TC06000344.hg	ATAT1	6.61628	0.376211	1.20786	-0.765824	0.633648	13.7301	0 .	7 x 43	CHR_HSCHR6_MHC_COX_CTG1 p21	alpha tubulin acetyltransferase 1
TC10000174.hg	1320	TC10000174.hg		8.84489	0.57706	1.20569	-1.96627	0.837484	25.6904	0 .	16 x 45
TC6_qbl_hap6000206.hg	1321	TC6_qbl_hap6000206.hg		7.52291	0.424344	1.20488	-1.13681	0.631117	13.6388	0 .	7 x 45	6 p22	HLA complex group 18
TC6_ssto_hap7000203.hg	1322	TC6_ssto_hap7000203.hg		7.33743	0.369773	1.20401	-0.931836	0.697268	16.306	0 .	8 x 44	6 p22	HLA complex group 18
TCUn_gl000211000004.hg	1323	TCUn_gl000211000004.hg	CBWD2	8.20968	0.458346	1.20398	-1.25989	0.750431	19.0325	0 .	8 x 44	2 q14	COBW domain containing 2
TC07002686.hg	1324	TC07002686.hg	ACTR3B	6.80725	0.498467	1.20076	-1.28982	0.60816	12.8426	0 .	7 x 43	7 q36	actin related protein 3B
TC0X001387.hg	1325	TC0X001387.hg		5.11203	0.531848	1.2007	-1.65358	0.841769	26.1387	0 .	17 x 45
TC17001703.hg	1326	TC17001703.hg	MBTD1	6.85576	0.411349	1.19807	-0.964993	0.731636	17.9911	0 .	9 x 43	17 q21	mbt domain containing 1
TC09001524.hg	1327	TC09001524.hg		5.10128	0.521132	1.19555	-1.72155	0.838295	25.7739	0 .	17 x 44
TC01000863.hg	1328	TC01000863.hg	FNBP1L	8.33847	0.622963	1.19478	-2.37257	0.485301	9.30422	0 .	3 x 44	1 p22	formin binding protein 1 like
TC10001187.hg	1329	TC10001187.hg	ZNF248	6.23323	0.370924	1.19446	-0.919759	0.821073	24.112	0 .	9 x 44	10 p11	zinc finger protein 248
TC04001634.hg	1330	TC04001634.hg	LRBA	8.20213	0.476376	1.18911	-1.21632	0.591376	12.2933	0 .	7 x 43	4 q31	LPS responsive beige-like anchor protein
TC01002490.hg	1331	TC01002490.hg		7.04448	0.601316	1.18614	-2.1885	0.820237	24.0369	0 .	17 x 45
TC10000564.hg	1332	TC10000564.hg		7.48397	0.523389	1.18503	-1.66098	0.84426	26.407	0 .	17 x 45
TC11001294.hg	1333	TC11001294.hg	ZNF195	6.33014	0.377664	1.17954	-0.95117	0.65493	14.5279	0 .	7 x 43	11 p15	zinc finger protein 195
TC04001092.hg	1334	TC04001092.hg	SEL1L3	8.54543	0.488893	1.17877	-2.25232	0.356263	6.39143	3.40608097282313e-10 .	5 x 44	4 p15	SEL1L family member 3
TC0X002066.hg	1335	TC0X002066.hg	SHROOM4	6.70431	0.47746	1.17787	-1.31346	0.315539	5.57417	2.91575210642492e-08 .	5 x 44	X p11	shroom family member 4
TC12000343.hg	1336	TC12000343.hg	TMEM106C	8.56007	0.610686	1.17635	-1.80034	0.236359	4.07763	2.9645953269819e-05 .	3 x 44	12 q13	transmembrane protein 106C
TC6_cox_hap2000224.hg	1337	TC6_cox_hap2000224.hg		7.54569	0.429116	1.1729	-1.1397	0.627754	13.5187	0 .	7 x 45	6 p22	HLA complex group 18
TC04001069.hg	1338	TC04001069.hg	DCAF16	7.79684	0.456275	1.17249	-1.71227	0.550284	11.0475	0 .	6 x 45	4 p15	DDB1 and CUL4 associated factor 16
TC06000890.hg	1339	TC06000890.hg	MFSD4B	6.6034	0.363038	1.17229	-0.820599	0.698206	16.3488	0 .	8 x 43	6 q21	major facilitator superfamily domain containing 4B
TC13000597.hg	1340	TC13000597.hg	ELF1	9.6207	0.428821	1.17139	-1.35669	0.350394	6.27125	6.73454625399472e-10 .	6 x 45	13 q14	E74 like ETS transcription factor 1
TC13000135.hg	1341	TC13000135.hg	NHLRC3	6.84763	0.460607	1.16995	-1.34607	0.680746	15.5783	0 .	8 x 45	13 q13	NHL repeat containing 3
TC03000565.hg	1342	TC03000565.hg	PLCXD2	5.08382	0.541064	1.16987	-1.68912	0.477298	9.10503	0 .	5 x 45	3 q13	phosphatidylinositol specific phospholipase C X domain containing 2
TC02000345.hg	1343	TC02000345.hg		5.21015	0.546122	1.16819	-1.22057	0.849214	26.9585	0 .	17 x 45
TC16001114.hg	1344	TC16001114.hg		7.47722	0.532267	1.16748	-1.81391	0.84011	25.9632	0 .	17 x 45
TC12000326.hg	1345	TC12000326.hg	TMEM117	6.91636	0.367975	1.16717	-1.40966	0.490301	9.43023	0 .	7 x 44	12 q12	transmembrane protein 117
TC05001425.hg	1346	TC05001425.hg		8.43123	0.481186	1.16619	-1.40683	0.879283	30.9458	0 .	11 x 45	5 q13	novel transcript
TC07002369.hg	1347	TC07002369.hg	ZNF138	6.66177	0.427637	1.16217	-1.25309	0.670565	15.1523	0 .	8 x 43	7 q11	zinc finger protein 138
TC02004518.hg	1348	TC02004518.hg	SLC35F5	7.42348	0.509181	1.16196	-1.66337	0.516321	10.1065	0 .	6 x 45	2 q14	solute carrier family 35 member F5
TC19001493.hg	1349	TC19001493.hg		5.73265	0.505355	1.16155	-1.15102	0.823986	24.3775	0 .	17 x 44
TC04000767.hg	1350	TC04000767.hg		4.78224	0.492277	1.15648	-1.49803	0.841842	26.1464	0 .	17 x 44
TCUn_gl000211000002.hg	1351	TCUn_gl000211000002.hg	CBWD2	8.29932	0.455201	1.15525	-1.2582	0.736455	18.2491	0 .	8 x 44	2 q14	COBW domain containing 2
TC02005003.hg	1352	TC02005003.hg	PHOSPHO2	5.59613	0.440681	1.14789	-1.14485	0.746489	18.8059	0 .	7 x 44	2 q31	phosphatase, orphan 2
TC6_apd_hap1000116.hg	1353	TC6_apd_hap1000116.hg		7.5246	0.428643	1.14702	-1.14818	0.630725	13.6247	0 .	7 x 45	6 p22	HLA complex group 18
TC6_dbb_hap3000206.hg	1354	TC6_dbb_hap3000206.hg		7.5246	0.428643	1.14702	-1.14818	0.630725	13.6247	0 .	7 x 45	6 p22	HLA complex group 18
TC16000250.hg	1355	TC16000250.hg		9.97925	0.540286	1.14082	-2.08592	0.835883	25.527	0 .	17 x 45
TC13000918.hg	1356	TC13000918.hg	PARP4	10.5985	0.567385	1.13996	-1.8197	0.412743	7.59603	2.27817764653082e-13 .	4 x 45	13 q12	poly(ADP-ribose) polymerase family member 4
TC03003308.hg	1357	TC03003308.hg		6.58958	0.389229	1.13853	-0.832201	0.797132	22.1302	0 .	10 x 43
TC6_ssto_hap7000186.hg	1358	TC6_ssto_hap7000186.hg		7.52957	0.426164	1.13802	-1.15561	0.629999	13.5987	0 .	7 x 45	6 p22	HLA complex group 18
TC20001560.hg	1359	TC20001560.hg	RBM39	9.79278	0.46175	1.13795	-1.10665	0.779341	20.8492	0 .	10 x 43	20 q11	RNA binding motif protein 39
TC0X001039.hg	1360	TC0X001039.hg	SHROOM4	6.22508	0.424679	1.13756	-1.03005	0.323836	5.73767	1.24056331873845e-08 .	5 x 44	X p11	shroom family member 4
TC04001081.hg	1361	TC04001081.hg		11.0872	0.581805	1.13715	-2.33307	0.811254	23.2584	0 .	17 x 45
TC14000999.hg	1362	TC14000999.hg		11.0917	0.585476	1.13269	-2.33752	0.792055	21.75	0 .	17 x 45
TC07000607.hg	1363	TC07000607.hg	ZKSCAN1	9.12432	0.525167	1.12844	-1.39864	0.505865	9.83043	0 .	4 x 45	7 q22	zinc finger with KRAB and SCAN domains 1
TC19001199.hg	1364	TC19001199.hg	ZNF443	6.47379	0.361931	1.128	-0.958549	0.69176	16.0581	0 .	8 x 43	19 p13	zinc finger protein 443
TC6_mann_hap4000181.hg	1365	TC6_mann_hap4000181.hg		7.21745	0.399402	1.12751	-1.07396	0.594407	12.3906	0 .	7 x 44	6 p22	HLA complex group 18
TC09000662.hg	1366	TC09000662.hg	RALGPS1	6.39362	0.41423	1.12004	-0.990691	0.604134	12.7084	0 .	7 x 43	9 q33	Ral GEF with PH domain and SH3 binding motif 1
TC07000386.hg	1367	TC07000386.hg	ZNF138	6.31205	0.423851	1.11396	-1.16504	0.718524	17.3179	0 .	8 x 44	7 q11	zinc finger protein 138
TC13000017.hg	1368	TC13000017.hg	MPHOSPH8	7.28067	0.377893	1.11151	-0.926018	0.651659	14.4016	0 .	7 x 45	13 q12	M-phase phosphoprotein 8
TC0Y000344.hg	1369	TC0Y000344.hg		4.97042	0.444705	1.11151	-1.70803	0.361486	6.49909	1.83536963405118e-10 .	5 x 45	Y q12	poly(ADP-ribose) polymerase family member 4 pseudogene 1
TC01000806.hg	1370	TC01000806.hg		6.74346	0.568478	1.10907	-1.99727	0.841832	26.1453	0 .	17 x 45
TC02002212.hg	1371	TC02002212.hg	ZC3H8	5.77107	0.383715	1.10885	-0.975673	0.699879	16.4255	0 .	7 x 43	2 q14	zinc finger CCCH-type containing 8
TC02001028.hg	1372	TC02001028.hg		8.2016	0.446137	1.10744	-1.58863	0.761665	19.7043	0 .	9 x 44	2 q31	novel transcript
TC09000417.hg	1373	TC09000417.hg	SECISBP2	7.56614	0.391846	1.10673	-1.00949	0.742892	18.6031	0 .	7 x 45	9 q22	SECIS binding protein 2
TC15000401.hg	1374	TC15000401.hg		6.96413	0.398933	1.10655	-1.03303	0.725613	17.6769	0 .	8 x 43	15 q21	MIR4713 host gene
TC06000768.hg	1375	TC06000768.hg	DOP1A	6.41682	0.428227	1.10367	-0.822131	0.70944	16.8743	0 .	8 x 45	6 q14	DOP1 leucine zipper like protein A
TC02000419.hg	1376	TC02000419.hg		4.66039	0.479498	1.09419	-1.76095	0.833642	25.3019	0 .	17 x 44
TC01003965.hg	1377	TC01003965.hg	C1orf131	6.02451	0.365772	1.0843	-0.962859	0.620378	13.2595	0 .	7 x 43	1 q42	chromosome 1 open reading frame 131
TC12001830.hg	1378	TC12001830.hg		8.00127	0.467216	1.06003	-1.13532	0.850746	27.1342	0 .	15 x 43	12 q22	novel pseudogene
TC03001661.hg	1379	TC03001661.hg	SPICE1	6.6369	0.398303	1.05943	-1.22075	0.706153	16.7179	0 .	8 x 43	3 q13	novel protein
TC11003013.hg	1380	TC11003013.hg	ZNF195	6.63859	0.351635	1.05842	-1.12346	0.618248	13.1857	0 .	7 x 43	11 p15	zinc finger protein 195
TC01001018.hg	1381	TC01001018.hg	ATP1A1	10.3546	0.540223	1.04409	-1.74207	0.219699	3.77507	9.75904022455509e-05 .	3 x 45	1 p13	ATPase Na+/K+ transporting subunit alpha 1
TC01001871.hg	1382	TC01001871.hg	ZNF678	5.82476	0.366496	1.04352	-0.842419	0.729852	17.8971	0 .	8 x 45	1 q42	zinc finger protein 678
TC0X000630.hg	1383	TC0X000630.hg		7.63665	0.487961	1.04329	-1.75321	0.83616	25.5551	0 .	17 x 44
TC02000506.hg	1384	TC02000506.hg		5.08491	0.476433	1.03595	-1.23228	0.828404	24.7916	0 .	17 x 44
TC11002007.hg	1385	TC11002007.hg		8.53248	0.567426	1.0344	-2.35098	0.832942	25.2325	0 .	17 x 45
TC02003942.hg	1386	TC02003942.hg	ING5	6.87647	0.411956	1.03321	-0.843509	0.593035	12.3465	0 .	8 x 43	2 q37	inhibitor of growth family member 5
TC14000556.hg	1387	TC14000556.hg		7.90826	0.500563	1.02385	-1.11459	0.844375	26.4195	0 .	17 x 44
TC22000220.hg	1388	TC22000220.hg		9.63399	0.428838	1.01995	-1.21355	0.660469	14.7452	0 .	7 x 44	22 q12	taurine up-regulated 1
TC02001799.hg	1389	TC02001799.hg		11.6907	0.510644	1.01982	-2.44947	0.830641	25.0069	0 .	17 x 44
TC01002910.hg	1390	TC01002910.hg		11.6912	0.509565	1.01764	-2.7095	0.820769	24.0847	0 .	17 x 45
TC22001070.hg	1391	TC22001070.hg		9.41782	0.414937	1.01653	-1.20771	0.652297	14.4261	0 .	7 x 43	22 q12	taurine up-regulated 1
TC13000622.hg	1392	TC13000622.hg		7.24513	0.405451	1.01275	-1.29361	0.409164	7.51687	3.77697872977478e-13 .	6 x 45
TC01003794.hg	1393	TC01003794.hg		5.18493	0.484707	1.01032	-1.63613	0.840839	26.0399	0 .	17 x 44
TC15001546.hg	1394	TC15001546.hg	DAPK2	6.79065	0.374847	1.00792	-0.7134	0.548657	11.0008	0 .	7 x 43	15 q22	death associated protein kinase 2
TC03002251.hg	1395	TC03002251.hg	HMGB1	11.5021	0.435441	0.999735	-1.14102	0.564131	11.453	0 .	5 x 45	22 q12	high mobility group box 1 pseudogene 10
TC20001227.hg	1396	TC20001227.hg	SRSF6	8.94823	0.402148	0.990296	-1.31299	0.759341	19.5621	0 .	9 x 43	20 q13	serine and arginine rich splicing factor 6
TC6_apd_hap1000030.hg	1397	TC6_apd_hap1000030.hg	DDR1	7.81134	0.513445	0.979813	-1.52061	0.223173	3.83786	7.6671297135511e-05 .	3 x 44	6 p21	discoidin domain receptor tyrosine kinase 1
TC09002929.hg	1398	TC09002929.hg		6.47764	0.33964	0.971022	-0.915226	0.73443	18.1399	0 .	8 x 44
TC13000822.hg	1399	TC13000822.hg	STK24	8.36788	0.411736	0.943372	-1.22087	0.285288	4.98966	5.30874760595879e-07 .	5 x 44	13 q32	serine/threonine kinase 24
TC13000030.hg	1400	TC13000030.hg	SAP18	7.80492	0.385666	0.937561	-0.970036	0.334546	5.95091	3.96039101513423e-09 .	5 x 45	13 q12	Sin3A associated protein 18
TC20000316.hg	1401	TC20000316.hg	SRSF6	8.73787	0.385472	0.936435	-1.3195	0.75075	19.051	0 .	9 x 43	20 q13	serine and arginine rich splicing factor 6
TC20000939.hg	1402	TC20000939.hg	ADNP	8.10743	0.37803	0.929748	-1.32683	0.746448	18.8036	0 .	7 x 43	20 q13	activity dependent neuroprotector homeobox
TC03002174.hg	1403	TC03002174.hg	DLG1	7.30191	0.353351	0.881134	-1.23998	0.693183	16.1216	0 .	7 x 43	3 q29	discs large MAGUK scaffold protein 1

## Sheet: SpotE
	Rank	ID	Symbol	mean expression	SD	max delta e	min delta e	correlation	->t.score	->p.value	Metagene	Chromosome	Description
TC14002240.hg	1	TC14002240.hg		3.68937	1.41705	7.84515	-2.19756	0.593671	12.3669	0 .	45 x 45	CHR_HSCHR14_3_CTG1 q32	immunoglobulin heavy diversity 3-3
TC22001440.hg	2	TC22001440.hg		5.21393	0.850932	6.53659	-1.0237	0.654056	14.4941	0 .	45 x 44	22 q11	immunoglobulin lambda variable 7-43
TC02004946.hg	3	TC02004946.hg		7.16653	1.54337	6.23569	-2.34176	0.836727	25.6128	0 .	45 x 45	2 p11	immunoglobulin kappa variable 2-28
TC02004973.hg	4	TC02004973.hg		2.93852	1.24118	5.97098	-1.42907	0.663372	14.8607	0 .	45 x 45	2 p11	immunoglobulin kappa variable 2-40
TC14002283.hg	5	TC14002283.hg		6.21728	1.04313	5.94267	-1.66464	0.77184	20.3493	0 .	45 x 45	14 q32	immunoglobulin heavy variable 3-73
TC22001439.hg	6	TC22001439.hg		5.65639	0.907961	5.86243	-1.07713	0.696573	16.2745	0 .	45 x 45	22 q11	immunoglobulin lambda variable 7-46 (gene/pseudogene)
TC14002248.hg	7	TC14002248.hg		5.94099	1.09081	5.74203	-1.48121	0.776944	20.6871	0 .	45 x 45
TC14002246.hg	8	TC14002246.hg		7.36814	0.967081	5.69722	-1.29267	0.743358	18.6292	0 .	45 x 45	CHR_HSCHR14_3_CTG1 q32	immunoglobulin heavy variable 2-5
TC14002254.hg	9	TC14002254.hg		7.31293	1.46852	5.65997	-2.3383	0.799022	22.2751	0 .	45 x 45	15 q11	immunoglobulin heavy variable 1/OR15-2 (pseudogene)
TC02003398.hg	10	TC02003398.hg		6.58982	1.26335	5.64635	-1.94089	0.808099	22.9968	0 .	45 x 45	2 p11	immunoglobulin kappa variable 2-30
TC02004949.hg	11	TC02004949.hg		3.01351	1.22143	5.62353	-1.48247	0.634313	13.7542	0 .	45 x 45	2 p11	immunoglobulin kappa variable 2-40
TC02003394.hg	12	TC02003394.hg		7.17763	1.75155	5.53996	-3.03961	0.828819	24.8313	0 .	45 x 45	2 p11	immunoglobulin kappa variable 4-1
TC22001442.hg	13	TC22001442.hg		6.3773	1.34342	5.53139	-2.19778	0.789418	21.5572	0 .	45 x 45	22 q11	immunoglobulin lambda variable 3-25
TC02004945.hg	14	TC02004945.hg		7.08545	1.18385	5.40104	-1.61216	0.831568	25.0973	0 .	45 x 45	2 p11	immunoglobulin kappa variable 1-27
TC02003400.hg	15	TC02003400.hg		7.43549	1.35401	5.37536	-2.09805	0.821468	24.1476	0 .	45 x 45	2 p11	immunoglobulin kappa variable 2-28
TC14002280.hg	16	TC14002280.hg		7.54536	1.38623	5.27204	-2.12251	0.781125	20.9714	0 .	45 x 45	14 q32	immunoglobulin heavy variable 1-69
TC22001445.hg	17	TC22001445.hg		7.05324	1.10235	5.26893	-1.44049	0.762159	19.7348	0 .	45 x 45	22 q11	immunoglobulin lambda variable 3-1
TC14002249.hg	18	TC14002249.hg		7.41265	1.54655	5.25372	-2.71186	0.806221	22.8438	0 .	45 x 45
TC22001436.hg	19	TC22001436.hg		6.26287	0.9379	5.22898	-1.17033	0.695236	16.214	0 .	45 x 45	22 q11	immunoglobulin lambda variable 6-57
TC01003491.hg	20	TC01003491.hg	DPT	5.72286	1.28078	5.17316	-1.48151	0.770162	20.2404	0 .	45 x 45	1 q24	novel transcript
TC02004978.hg	21	TC02004978.hg		7.20136	1.33795	5.15072	-2.1027	0.83374	25.3117	0 .	45 x 45	2 p11	immunoglobulin kappa variable 2-28
TC16000397.hg	22	TC16000397.hg		7.36059	1.42073	5.12629	-2.30066	0.835704	25.5089	0 .	45 x 45	16 p11	immunoglobulin heavy variable 1/OR16-4 (pseudogene)
TC14002281.hg	23	TC14002281.hg		5.94097	0.998603	5.10948	-1.36929	0.732479	18.0358	0 .	45 x 45	14 q32	immunoglobulin heavy variable 2-70D
TC14002255.hg	24	TC14002255.hg		6.08224	1.40217	5.0759	-2.25675	0.849961	27.0438	0 .	45 x 45	CHR_HSCHR14_3_CTG1 q32	immunoglobulin heavy variable 3-20
TC14002252.hg	25	TC14002252.hg		7.14396	1.47359	5.04353	-2.66706	0.850663	27.1246	0 .	45 x 45	CHR_HSCHR14_3_CTG1 q32	immunoglobulin heavy variable 3-15
TC02003395.hg	26	TC02003395.hg		7.04009	1.32346	5.03565	-1.95527	0.823993	24.3781	0 .	45 x 45	2 p11	immunoglobulin kappa variable 2-40
TC14002234.hg	27	TC14002234.hg		4.85898	1.26178	5.01975	-2.36792	0.582103	12.0005	0 .	45 x 45	CHR_HSCHR14_3_CTG1 q32	immunoglobulin heavy diversity 3-10
TC14002256.hg	28	TC14002256.hg		6.44722	1.19174	5.01909	-2.1259	0.816744	23.7281	0 .	45 x 45	CHR_HSCHR14_3_CTG1 q32	immunoglobulin heavy variable 3-21
TC02003399.hg	29	TC02003399.hg		5.49122	1.10906	4.98409	-1.61853	0.798453	22.2313	0 .	45 x 45	2 p11	immunoglobulin kappa variable 2-29 (gene/pseudogene)
TC02000554.hg	30	TC02000554.hg		5.86654	0.96644	4.97007	-1.28124	0.783974	21.1693	0 .	45 x 45	2 p11	immunoglobulin kappa variable 2-26 (pseudogene)
TC14002214.hg	31	TC14002214.hg		4.78001	0.966324	4.9581	-1.00341	0.661465	14.7847	0 .	45 x 45
TC16001512.hg	32	TC16001512.hg		5.63938	1.24469	4.91013	-2.65607	0.831468	25.0876	0 .	45 x 45	16 p11	immunoglobulin heavy variable 3/OR16-6 (pseudogene)
TC16000387.hg	33	TC16000387.hg		8.53513	1.81752	4.88766	-3.64777	0.843242	26.2966	0 .	45 x 45	15 q11	novel gene identicle to IGHV1OR15-1
TC17000408.hg	34	TC17000408.hg	CCL4	5.68928	0.767291	4.86958	-1.23528	0.780974	20.961	0 .	43 x 44	CHR_HSCHR17_7_CTG4 q12	C-C motif chemokine ligand 4
TC14002241.hg	35	TC14002241.hg		2.614	1.04993	4.86078	-1.48841	0.501427	9.71503	0 .	45 x 45	CHR_HSCHR14_3_CTG1 q32	immunoglobulin heavy diversity 2-2
TC15001041.hg	36	TC15001041.hg		7.71356	1.13825	4.8053	-1.72676	0.824101	24.388	0 .	45 x 45	15 q11	novel gene identicle to IGHV1OR15-1
TC16001073.hg	37	TC16001073.hg		6.49771	1.21438	4.78736	-2.33669	0.824164	24.3939	0 .	45 x 45	16 p11	immunoglobulin heavy variable 3/OR16-6 (pseudogene)
TC14002207.hg	38	TC14002207.hg		8.54788	1.36397	4.74759	-2.39321	0.821518	24.1522	0 .	45 x 45	CHR_HSCHR14_3_CTG1 q32	immunoglobulin heavy constant gamma 4 (G4m marker)
TC14002273.hg	39	TC14002273.hg		6.52403	0.851587	4.73905	-1.24833	0.750901	19.0598	0 .	45 x 45	14 q32	immunoglobulin heavy variable 5-51
TC02004939.hg	40	TC02004939.hg		7.97659	1.08607	4.7103	-1.52868	0.833925	25.3302	0 .	45 x 45	2 p11	immunoglobulin kappa variable 1-6
TC22001441.hg	41	TC22001441.hg		5.75139	0.808396	4.70898	-1.2786	0.709031	16.8547	0 .	45 x 45	22 q11	immunoglobulin lambda variable 3-27
TC02000555.hg	42	TC02000555.hg		6.59005	1.09878	4.70865	-1.84193	0.77395	20.4877	0 .	45 x 45	2 p11	immunoglobulin kappa variable 2-24
TC02004982.hg	43	TC02004982.hg		7.63932	1.20198	4.69646	-1.72612	0.845753	26.5706	0 .	45 x 45	2 p11	immunoglobulin kappa variable 1D-16
TC14002268.hg	44	TC14002268.hg		7.45437	1.43184	4.69272	-2.71139	0.875489	30.3699	0 .	45 x 45	CHR_HSCHR14_3_CTG1 q32	immunoglobulin heavy variable 3-43
TC14002261.hg	45	TC14002261.hg		8.87194	1.58875	4.69214	-3.1189	0.862764	28.6043	0 .	45 x 45	CHR_HSCHR14_3_CTG1 q32	immunoglobulin heavy variable 3-30
TC02004943.hg	46	TC02004943.hg		7.01891	0.961213	4.68087	-1.45856	0.816647	23.7197	0 .	45 x 45	2 p11	immunoglobulin kappa variable 1-17
TC02004980.hg	47	TC02004980.hg		6.98806	1.01081	4.65881	-1.54257	0.812307	23.3471	0 .	45 x 45	2 p11	immunoglobulin kappa variable 3-20
TC14002213.hg	48	TC14002213.hg		8.02108	1.31878	4.65653	-1.98585	0.755993	19.3601	0 .	45 x 45	CHR_HSCHR14_3_CTG1 q32	immunoglobulin heavy constant mu
TC14002247.hg	49	TC14002247.hg		5.86248	1.21458	4.63244	-1.97587	0.853746	27.4854	0 .	45 x 45	CHR_HSCHR14_3_CTG1 q32	immunoglobulin heavy variable 3-7
TC14002215.hg	50	TC14002215.hg		8.47537	1.25311	4.62266	-2.2096	0.851056	27.1701	0 .	45 x 45	CHR_HSCHR14_3_CTG1 q32	immunoglobulin heavy joining 5
TC02000553.hg	51	TC02000553.hg		6.03838	1.00499	4.57362	-1.5332	0.813671	23.463	0 .	45 x 45	2 p11	immunoglobulin kappa variable 2-29 (gene/pseudogene)
TC14002260.hg	52	TC14002260.hg		7.35769	1.41804	4.54269	-2.27984	0.85189	27.2669	0 .	45 x 45	CHR_HSCHR14_3_CTG1 q32	immunoglobulin heavy variable 4-28
TC02003401.hg	53	TC02003401.hg		8.00052	1.38385	4.53344	-2.17025	0.858379	28.0479	0 .	45 x 45	2 p11	immunoglobulin kappa variable 3-20
TC22000119.hg	54	TC22000119.hg		8.66951	1.39651	4.52173	-2.18335	0.866361	29.0795	0 .	45 x 45	22 q11	immunoglobulin lambda variable 2-18
TC02004944.hg	55	TC02004944.hg		6.5296	1.1621	4.50662	-1.65631	0.779652	20.8704	0 .	45 x 45	2 p11	immunoglobulin kappa variable 2-24
TC02004942.hg	56	TC02004942.hg		6.88538	1.10875	4.50457	-2.02568	0.833032	25.2414	0 .	45 x 45	2 p11	immunoglobulin kappa variable 3-11
TC14002257.hg	57	TC14002257.hg		8.53918	1.65771	4.50337	-3.5619	0.857293	27.9139	0 .	45 x 45	CHR_HSCHR14_3_CTG1 q32	immunoglobulin heavy variable 3-23
TC02004396.hg	58	TC02004396.hg		7.15228	1.38125	4.49688	-2.38175	0.859068	28.1338	0 .	45 x 45	2 p11	immunoglobulin kappa joining 1
TC02003397.hg	59	TC02003397.hg		8.35038	1.18934	4.45856	-1.77884	0.827684	24.7232	0 .	45 x 45	2 p11	immunoglobulin kappa variable 1-33
TC14002267.hg	60	TC14002267.hg		3.93898	1.11588	4.45153	-1.45669	0.805007	22.7459	0 .	45 x 45	CHR_HSCHR14_3_CTG1 q32	immunoglobulin heavy variable 4-39
TC02002076.hg	61	TC02002076.hg		6.28008	0.892679	4.44735	-1.54128	0.808572	23.0357	0 .	45 x 45	2 p11	immunoglobulin kappa variable 3-7 (non-functional)
TC06004122.hg	62	TC06004122.hg	HLA-DRB5	7.88317	1.46241	4.43922	-2.19095	0.599451	12.5543	0 .	43 x 45	6 p21	major histocompatibility complex, class II, DR beta 5
TC6_cox_hap2000091.hg	63	TC6_cox_hap2000091.hg	HLA-DQA1	7.70351	1.73944	4.43908	-2.76056	0.331572	5.89143	5.46222311825773e-09 .	44 x 43	CHR_HSCHR6_MHC_COX_CTG1	major histocompatibility complex, class II, DQ alpha 2
TC6_qbl_hap6000082.hg	64	TC6_qbl_hap6000082.hg	HLA-DQA1	7.70351	1.73944	4.43908	-2.76056	0.331572	5.89143	5.46222311825773e-09 .	44 x 43	CHR_HSCHR6_MHC_COX_CTG1	major histocompatibility complex, class II, DQ alpha 2
TC02004983.hg	65	TC02004983.hg		7.50654	0.97314	4.42382	-1.56514	0.806377	22.8564	0 .	45 x 45	2 p11	immunoglobulin kappa variable 3-15
TC02003403.hg	66	TC02003403.hg		8.76003	1.36675	4.3881	-2.05692	0.854563	27.5829	0 .	45 x 45	2 p11	immunoglobulin kappa variable 3-7 (non-functional)
TC02004979.hg	67	TC02004979.hg		8.90144	1.4852	4.38356	-2.93635	0.852122	27.2941	0 .	45 x 45	2 p11	immunoglobulin kappa variable 1-27
TC02000558.hg	68	TC02000558.hg		7.81394	0.975651	4.38048	-1.44293	0.819802	23.998	0 .	45 x 45	2 p11	immunoglobulin kappa variable 1D-42 (non-functional)
TC02003402.hg	69	TC02003402.hg		8.14674	1.39879	4.3638	-2.69162	0.845843	26.5805	0 .	45 x 45	2 p11	immunoglobulin kappa variable 1-12
TC14002282.hg	70	TC14002282.hg		5.93501	1.22839	4.35853	-2.1797	0.867252	29.2	0 .	45 x 45	14 q32	immunoglobulin heavy variable 3-72
TC17000383.hg	71	TC17000383.hg	CCL2	8.79314	1.29395	4.35636	-3.07828	0.673051	15.2548	0 .	44 x 45	17 q12	C-C motif chemokine ligand 2
TC09001475.hg	72	TC09001475.hg	SVEP1	5.81418	0.856283	4.35582	-1.27598	0.785727	21.2929	0 .	44 x 43	9 q31	sushi, von Willebrand factor type A, EGF and pentraxin domain containing 1
TC02004947.hg	73	TC02004947.hg		5.22282	0.847143	4.35221	-1.36921	0.713253	17.0583	0 .	45 x 45	2 p11	immunoglobulin kappa variable 2-29 (gene/pseudogene)
TC02000559.hg	74	TC02000559.hg		7.96579	1.24809	4.33498	-2.25254	0.857357	27.9217	0 .	45 x 45	2 p11	immunoglobulin kappa variable 3D-7
TC22000467.hg	75	TC22000467.hg		9.24652	1.55385	4.33441	-3.46837	0.838556	25.8009	0 .	45 x 45	2 p11	immunoglobulin kappa variable 1-13 (gene/pseudogene)
TC14002259.hg	76	TC14002259.hg		6.67818	0.703356	4.32288	-0.972288	0.699525	16.4092	0 .	45 x 44	CHR_HSCHR14_3_CTG1 q32	immunoglobulin heavy variable 2-26
TC04001305.hg	77	TC04001305.hg	CXCL10	6.32017	1.28833	4.32044	-2.79562	0.562454	11.4031	0 .	45 x 44	4 q21	C-X-C motif chemokine ligand 10
TC14002279.hg	78	TC14002279.hg		7.44672	1.43893	4.30937	-3.00893	0.870708	29.6782	0 .	45 x 45	14 q32	immunoglobulin heavy variable 3-66
TC02000531.hg	79	TC02000531.hg		7.88493	1.32573	4.29799	-2.07988	0.856623	27.8317	0 .	45 x 45	2 p11	immunoglobulin kappa variable 3D-7
TC02004975.hg	80	TC02004975.hg		7.9653	1.09745	4.28647	-1.73593	0.82647	24.6086	0 .	45 x 45	2 p11	immunoglobulin kappa variable 1-37 (non-functional)
TC22000122.hg	81	TC22000122.hg		8.80633	1.34308	4.28472	-2.17172	0.843629	26.3385	0 .	45 x 45	22 q11	immunoglobulin lambda variable 2-11
TC02004398.hg	82	TC02004398.hg		6.7384	1.06449	4.26879	-1.66122	0.789322	21.5503	0 .	45 x 45	2 p11	immunoglobulin kappa variable 2-24
TC02004941.hg	83	TC02004941.hg		7.58361	1.13601	4.25016	-2.02217	0.847942	26.8146	0 .	45 x 45	2 p11	immunoglobulin kappa variable 1-9
TC02004938.hg	84	TC02004938.hg		7.37774	0.968141	4.2321	-1.41183	0.828731	24.8229	0 .	45 x 45	2 p11	immunoglobulin kappa variable 1-5
TC02002077.hg	85	TC02002077.hg		5.08431	0.967086	4.22813	-1.23302	0.710471	16.9237	0 .	45 x 45	2 p11	immunoglobulin kappa variable 6-21 (non-functional)
TC14002277.hg	86	TC14002277.hg		8.06648	1.15347	4.21386	-1.75666	0.854108	27.5285	0 .	45 x 45	14 q32	immunoglobulin heavy variable 4-59
TC05000187.hg	87	TC05000187.hg	C7	7.4004	1.63538	4.21259	-2.84913	0.737047	18.2812	0 .	45 x 43	5 p13	complement C7
TC02004986.hg	88	TC02004986.hg		6.32047	0.907422	4.2078	-1.39836	0.801623	22.4774	0 .	45 x 45	2 p11	immunoglobulin kappa variable 3-15
TC16000386.hg	89	TC16000386.hg		6.77564	1.13635	4.19149	-1.68653	0.857877	27.9858	0 .	45 x 45	16 p11	immunoglobulin heavy variable 3-23 (IGHV3-23) pseudogene
TC04002623.hg	90	TC04002623.hg	SPARCL1	7.54058	1.17136	4.17347	-3.17262	0.662716	14.8345	0 .	42 x 45	4 q22	SPARC like 1
TC06003602.hg	91	TC06003602.hg	HLA-DRB1	4.97122	1.38401	4.14834	-2.06594	0.617813	13.1707	0 .	43 x 45	6 p21	major histocompatibility complex, class II, DR beta 1
TC02003396.hg	92	TC02003396.hg		9.71976	1.50948	4.14679	-3.21541	0.850887	27.1504	0 .	45 x 45	2 p11	immunoglobulin kappa variable 1-39 (gene/pseudogene)
TC06003017.hg	93	TC06003017.hg	PLN	5.5691	1.20221	4.13602	-2.03285	0.728321	17.8171	0 .	42 x 45	6 q22	phospholamban
TC06000935.hg	94	TC06000935.hg	PLN	5.43219	1.10494	4.13587	-1.69393	0.727122	17.7548	0 .	42 x 45	6 q22	phospholamban
TC02004397.hg	95	TC02004397.hg		9.16699	1.13968	4.12905	-2.11791	0.84726	26.7381	0 .	45 x 45	2 p11	immunoglobulin kappa variable 1-12
TC22000120.hg	96	TC22000120.hg		8.29272	1.10774	4.1278	-1.60572	0.812445	23.3588	0 .	45 x 45	22 q11	immunoglobulin lambda variable 2-14
TC02004974.hg	97	TC02004974.hg		8.98481	1.31156	4.12099	-2.32016	0.856389	27.8033	0 .	45 x 45	2 p11	immunoglobulin kappa variable 1-39 (gene/pseudogene)
TC02004940.hg	98	TC02004940.hg		5.76546	0.939094	4.0945	-1.34572	0.831525	25.0931	0 .	45 x 45	2 p11	immunoglobulin kappa variable 1-8
TC04001270.hg	99	TC04001270.hg	JCHAIN	7.25759	1.4898	4.07834	-2.58342	0.860086	28.2617	0 .	45 x 45	4 q13	joining chain of multimeric IgA and IgM
TC15000386.hg	100	TC15000386.hg	FGF7	3.92142	0.996592	4.07636	-1.39348	0.79268	21.7961	0 .	43 x 45	15 q21	fibroblast growth factor 7
TC22001005.hg	101	TC22001005.hg		8.31325	1.18722	4.07504	-2.16213	0.863758	28.734	0 .	45 x 45
TC02004976.hg	102	TC02004976.hg		7.85141	1.14117	4.04994	-2.03668	0.793789	21.8784	0 .	45 x 45	2 p11	immunoglobulin kappa variable 1-33
TC22000117.hg	103	TC22000117.hg		8.64154	1.30668	4.0481	-1.93758	0.845049	26.4931	0 .	45 x 45	22 q11	immunoglobulin lambda variable 2-28 (pseudogene)
TC16000398.hg	104	TC16000398.hg		9.10718	1.12585	4.04632	-1.70358	0.866465	29.0935	0 .	45 x 45	16 p11	immunoglobulin heavy variable 3/OR16-8 (non-functional)
TC18000273.hg	105	TC18000273.hg	COLEC12	6.36564	1.1673	4.04486	-1.44266	0.723122	17.5494	0 .	43 x 45	18 p11	collectin subfamily member 12
TC16001518.hg	106	TC16001518.hg		7.89362	1.33582	4.04174	-2.48829	0.873807	30.1223	0 .	45 x 45	16 p11	immunoglobulin heavy variable 3/OR16-13 (non-functional)
TC14002272.hg	107	TC14002272.hg		6.5555	1.32182	4.03243	-2.37441	0.86497	28.8936	0 .	45 x 45	14 q32	immunoglobulin heavy variable 3-49
TC14002262.hg	108	TC14002262.hg		5.87409	1.05695	4.03238	-1.66083	0.840432	25.997	0 .	45 x 45	14 q32	immunoglobulin heavy variable 4-31
TC02004395.hg	109	TC02004395.hg		7.71166	1.1612	3.98954	-1.90777	0.858883	28.1107	0 .	45 x 45
TC14002284.hg	110	TC14002284.hg		6.89995	0.994021	3.98407	-1.86396	0.845454	26.5377	0 .	45 x 45	CHR_HSCHR14_3_CTG1 q32	immunoglobulin heavy variable 3-74
TC22001009.hg	111	TC22001009.hg		9.00903	1.42266	3.97303	-2.7872	0.865632	28.9818	0 .	45 x 45	22 q11	immunoglobulin lambda constant 6 (gene/pseudogene)
TC22001197.hg	112	TC22001197.hg	VWF	6.80591	0.882526	3.95534	-1.66691	0.71716	17.2502	0 .	42 x 45	22 q11	von Willebrand factor pseudogene 1
TC02002080.hg	113	TC02002080.hg		6.24963	0.861342	3.95107	-1.54936	0.804137	22.6763	0 .	45 x 45	2 p11	immunoglobulin kappa variable 3D-7
TC14002271.hg	114	TC14002271.hg		7.77433	1.22871	3.94111	-2.04957	0.85714	27.895	0 .	45 x 45	14 q32	immunoglobulin heavy variable 3-48
TC06001569.hg	115	TC06001569.hg	HLA-DRB1	4.97821	1.35159	3.90989	-1.90961	0.613224	13.0135	0 .	43 x 45	6 p21	major histocompatibility complex, class II, DR beta 1
TC02000550.hg	116	TC02000550.hg		5.64812	0.839122	3.87688	-1.28891	0.811334	23.2652	0 .	45 x 45	2 p11	immunoglobulin kappa variable 4-1
TC03000831.hg	117	TC03000831.hg	SUCNR1	4.33786	0.940533	3.87584	-1.58626	0.670397	15.1454	0 .	42 x 45	3 q25	succinate receptor 1
TC0X000051.hg	118	TC0X000051.hg	TLR7	4.85425	1.02056	3.87067	-1.86184	0.8472	26.7314	0 .	43 x 45	X p22	toll like receptor 7
TC14002266.hg	119	TC14002266.hg		5.99355	0.981979	3.86762	-1.83221	0.832674	25.206	0 .	45 x 45	CHR_HSCHR14_3_CTG1 q32	immunoglobulin heavy variable 3-38 (non-functional)
TC14002265.hg	120	TC14002265.hg		7.9055	1.28135	3.84078	-2.67402	0.87183	29.8373	0 .	45 x 45	CHR_HSCHR14_3_CTG1 q32	immunoglobulin heavy variable 3-35 (non-functional)
TC22001449.hg	121	TC22001449.hg		9.40534	1.59968	3.83847	-3.17949	0.861361	28.4237	0 .	45 x 45	22 q11	immunoglobulin lambda constant 7
TC22000124.hg	122	TC22000124.hg		8.22724	1.00776	3.82387	-1.5295	0.81468	23.5494	0 .	45 x 45	22 q11	immunoglobulin lambda variable 2-5 (pseudogene)
TC19001977.hg	123	TC19001977.hg	ICAM1	7.82523	0.859783	3.81508	-2.02479	0.743944	18.6621	0 .	45 x 43	19 p13	intercellular adhesion molecule 1
TC16001071.hg	124	TC16001071.hg		6.29685	1.13273	3.80697	-1.84245	0.868038	29.3072	0 .	45 x 45	16 p11	immunoglobulin heavy variable 3/OR16-8 (non-functional)
TC02004950.hg	125	TC02004950.hg		7.52249	1.08944	3.79912	-1.73593	0.860905	28.3655	0 .	45 x 45
TC16001072.hg	126	TC16001072.hg		7.41106	0.836422	3.75217	-1.465	0.786884	21.3751	0 .	45 x 45	16 p11	immunoglobulin heavy variable 1/OR16-3 (pseudogene)
TC16000396.hg	127	TC16000396.hg		8.56793	1.47622	3.74777	-3.19513	0.864727	28.8615	0 .	45 x 45	16 p11	immunoglobulin heavy variable 3-23 (IGHV3-23) pseudogene
TC22001245.hg	128	TC22001245.hg		8.17465	0.825568	3.74675	-1.27539	0.801538	22.4707	0 .	45 x 45
TC02004988.hg	129	TC02004988.hg		5.47721	0.719922	3.746	-1.66086	0.722744	17.5302	0 .	45 x 44
TC01000794.hg	130	TC01000794.hg	IFI44L	5.12718	1.28654	3.74322	-1.83673	0.424139	7.85103	4.37427871702312e-14 .	43 x 44	1 p31	interferon induced protein 44 like
TC15002431.hg	131	TC15002431.hg		6.09766	0.751663	3.74044	-1.02303	0.819345	23.9572	0 .	45 x 45
TC05003035.hg	132	TC05003035.hg	CD180	5.74474	0.949574	3.73069	-1.67876	0.890644	32.8345	0 .	44 x 45	5 q12	CD180 molecule
TC6_ssto_hap7000077.hg	133	TC6_ssto_hap7000077.hg	HLA-DQA1	7.34051	1.21393	3.72852	-2.69848	0.767601	20.0761	0 .	44 x 45	CHR_HSCHR6_MHC_SSTO_CTG1	major histocompatibility complex, class II, DQ alpha 1
TC05001419.hg	134	TC05001419.hg	CD180	5.38863	0.978899	3.72346	-1.87829	0.898393	34.2897	0 .	44 x 45	5 q12	CD180 molecule
TC08000191.hg	135	TC08000191.hg	ADAMDEC1	5.79802	1.01177	3.71537	-1.85944	0.67723	15.4293	0 .	44 x 45	8 p21	ADAM like decysin 1
TC14002216.hg	136	TC14002216.hg		8.5071	0.796841	3.70841	-1.61068	0.790541	21.6389	0 .	45 x 45	CHR_HSCHR14_3_CTG1 q32	immunoglobulin heavy joining 2
TC14002286.hg	137	TC14002286.hg		7.26348	0.849534	3.69062	-1.46043	0.803234	22.6044	0 .	45 x 45	14 q32	immunoglobulin heavy variable 7-81 (non-functional)
TC14002278.hg	138	TC14002278.hg		5.55266	1.25141	3.69005	-2.96084	0.86739	29.2188	0 .	45 x 45	14 q32	immunoglobulin heavy variable 3-64
TC0X001324.hg	139	TC0X001324.hg	TMEM255A	5.66682	0.900705	3.68474	-1.34301	0.751246	19.0799	0 .	43 x 45	X q24	transmembrane protein 255A
TC14002211.hg	140	TC14002211.hg		9.39105	1.49621	3.6766	-3.30201	0.825495	24.5174	0 .	45 x 45	CHR_HSCHR14_3_CTG1 q32	immunoglobulin heavy constant alpha 1
TC06000051.hg	141	TC06000051.hg	LY86	6.4547	1.1193	3.671	-1.98138	0.886649	32.14	0 .	44 x 45	6 p25	lymphocyte antigen 86
TC02002591.hg	142	TC02002591.hg	FRZB	6.90455	1.13868	3.65188	-1.92273	0.684555	15.7419	0 .	42 x 45	2 q32	frizzled related protein
TC14001443.hg	143	TC14001443.hg	FBLN5	6.88976	0.866836	3.65029	-1.43844	0.765011	19.9124	0 .	44 x 43	14 q32	fibulin 5
TC16000454.hg	144	TC16000454.hg	MMP2	8.14152	1.14366	3.62439	-1.94262	0.860486	28.3123	0 .	44 x 45	16 q12	matrix metallopeptidase 2
TC14002189.hg	145	TC14002189.hg		7.79155	1.03034	3.61657	-1.57101	0.868739	29.4036	0 .	45 x 45
TC14002250.hg	146	TC14002250.hg		7.34938	1.13956	3.61513	-2.14116	0.863082	28.6456	0 .	45 x 45	CHR_HSCHR14_3_CTG1 q32	immunoglobulin heavy variable 3-11 (gene/pseudogene)
TC14002263.hg	147	TC14002263.hg		9.48637	1.37169	3.60055	-2.92683	0.854234	27.5436	0 .	45 x 45	CHR_HSCHR14_3_CTG1 q32	immunoglobulin heavy variable 3-30
TC05000227.hg	148	TC05000227.hg	GZMK	4.91232	1.18402	3.58623	-1.70208	0.879254	30.9412	0 .	45 x 45	5 q11	granzyme K
TC12002752.hg	149	TC12002752.hg	CD69	5.03454	1.04072	3.58483	-1.68551	0.835826	25.5212	0 .	45 x 44	12 p13	CD69 molecule
TC0Y000160.hg	150	TC0Y000160.hg		10.1326	1.3978	3.57771	-3.05823	0.833935	25.3311	0 .	45 x 45	2 p11	immunoglobulin kappa variable 1-17
TC14002269.hg	151	TC14002269.hg		5.46476	0.71537	3.55446	-1.27082	0.785035	21.2439	0 .	45 x 45	CHR_HSCHR14_3_CTG1 q32	immunoglobulin heavy variable 1-45
TC16001860.hg	152	TC16001860.hg		7.24276	1.18628	3.54974	-2.2828	0.869414	29.497	0 .	45 x 45	16 p11	novel gene similar to an immunoglobulin heavy variable 3/OR16 gene
TC12001207.hg	153	TC12001207.hg	CD69	5.24159	1.00982	3.53811	-1.43613	0.830098	24.9543	0 .	44 x 44	12 p13	CD69 molecule
TC02004948.hg	154	TC02004948.hg		6.64855	0.712058	3.53218	-1.0307	0.78147	20.9952	0 .	45 x 45	2 p11	immunoglobulin kappa variable 1-37 (non-functional)
TC19000676.hg	155	TC19000676.hg	C5AR1	6.17276	0.989416	3.52979	-1.81434	0.825187	24.4886	0 .	43 x 45	19 q13	complement C5a receptor 1
TC03003028.hg	156	TC03003028.hg	CCDC80	6.14671	1.04687	3.52878	-2.00993	0.812902	23.3975	0 .	43 x 45	3 q13	coiled-coil domain containing 80
TC10000135.hg	157	TC10000135.hg	MRC1	7.47122	1.15786	3.5277	-2.62157	0.790846	21.6612	0 .	44 x 45	10 p12	mannose receptor C-type 1
TC10000132.hg	158	TC10000132.hg	MRC1	7.56747	1.14707	3.52628	-2.61117	0.788848	21.516	0 .	44 x 45	10 p12	mannose receptor C-type 1
TC01005699.hg	159	TC01005699.hg		4.69226	1.26219	3.52312	-2.21295	0.903715	35.3839	0 .	45 x 45	1 p13	novel transcript
TC22001450.hg	160	TC22001450.hg		7.53499	0.751279	3.51196	-1.02214	0.846915	26.6995	0 .	45 x 45
TC03001612.hg	161	TC03001612.hg	ABI3BP	6.07373	0.915695	3.48621	-1.41784	0.775104	20.5642	0 .	44 x 44	3 q12	ABI family member 3 binding protein
TC0X000428.hg	162	TC0X000428.hg	GPR174	4.79703	1.19823	3.47851	-2.11586	0.847037	26.7131	0 .	45 x 45	X q21	G protein-coupled receptor 174
TC22001247.hg	163	TC22001247.hg		6.79122	0.975302	3.46904	-1.70317	0.841888	26.1513	0 .	45 x 45
TC14002274.hg	164	TC14002274.hg		7.10821	1.18564	3.46596	-2.41672	0.863314	28.6758	0 .	45 x 45	14 q32	immunoglobulin heavy variable 3-53
TC16000388.hg	165	TC16000388.hg		9.43978	1.32464	3.46218	-2.51144	0.871815	29.8351	0 .	45 x 45	16 p11	immunoglobulin heavy variable 3/OR16-9 (non-functional)
TC13000829.hg	166	TC13000829.hg	GPR183	7.31871	1.1471	3.45321	-2.45534	0.848514	26.8791	0 .	44 x 45	13 q32	G protein-coupled receptor 183
TC01001624.hg	167	TC01001624.hg	RGS2	7.37413	1.00996	3.42555	-2.06987	0.775432	20.586	0 .	43 x 45	1 q31	regulator of G protein signaling 2
TC01001172.hg	168	TC01001172.hg	FCGR1B	5.62519	0.922055	3.41566	-1.47115	0.88547	31.9416	0 .	43 x 45	1 p11	Fc fragment of IgG receptor Ib
TC01005928.hg	169	TC01005928.hg	SELL	5.53844	0.936176	3.40841	-2.06286	0.870856	29.699	0 .	45 x 44	1 q24	selectin L
TC01003057.hg	170	TC01003057.hg	FCGR1B	6.27333	0.868215	3.3942	-1.59188	0.877563	30.6815	0 .	43 x 45	1 p11	Fc fragment of IgG receptor Ib
TC22000111.hg	171	TC22000111.hg		7.54763	0.791183	3.39388	-1.22556	0.806033	22.8286	0 .	45 x 45	22 q11	immunoglobulin lambda variable 2-33 (non-functional)
TC08000700.hg	172	TC08000700.hg	COL14A1	7.21613	1.03969	3.39018	-1.84012	0.789915	21.5934	0 .	44 x 44	8 q24	collagen type XIV alpha 1 chain
TC01001738.hg	173	TC01001738.hg	CR1	6.34187	0.97459	3.37494	-1.40916	0.855697	27.7192	0 .	43 x 45	1 q32	complement C3b/C4b receptor 1 (Knops blood group)
TC11002952.hg	174	TC11002952.hg	KCNJ5	5.03453	0.851837	3.36383	-1.12532	0.765119	19.9192	0 .	42 x 45	11 q24	potassium inwardly rectifying channel subfamily J member 5
TC14002209.hg	175	TC14002209.hg		7.89202	1.16238	3.36163	-2.20387	0.846132	26.6125	0 .	45 x 45	CHR_HSCHR14_3_CTG1 q32	immunoglobulin heavy constant gamma P (non-functional)
TC07003035.hg	176	TC07003035.hg	FGL2	5.95184	1.23086	3.35407	-3.13384	0.836765	25.6167	0 .	45 x 44	7 q11	fibrinogen like 2
TC16000385.hg	177	TC16000385.hg		10.3965	1.27528	3.35077	-2.33674	0.866718	29.1276	0 .	45 x 45	14 q32	immunoglobulin heavy variable 3-72
TC02000398.hg	178	TC02000398.hg	PLEK	6.56828	0.924508	3.35042	-1.79879	0.889433	32.6203	0 .	44 x 45	2 p14	pleckstrin
TC22001480.hg	179	TC22001480.hg	ADA2	6.93114	0.850686	3.34232	-1.33336	0.885762	31.9905	0 .	43 x 45	22 q11	adenosine deaminase 2
TC05000165.hg	180	TC05000165.hg	SLC1A3	5.84621	0.903042	3.33556	-1.25369	0.836561	25.5959	0 .	43 x 45	5 p13	solute carrier family 1 member 3
TC01000818.hg	181	TC01000818.hg	CCN1	7.97034	0.986947	3.31636	-1.83008	0.721161	17.4501	0 .	42 x 45	1 p22	cellular communication network factor 1
TC17001820.hg	182	TC17001820.hg	SLC16A6	6.36727	0.854542	3.30729	-1.39753	0.758074	19.4852	0 .	43 x 45	17 q24	solute carrier family 16 member 6
TC06000737.hg	183	TC06000737.hg	CD109	5.97931	0.962342	3.3055	-1.63676	0.691041	16.0262	0 .	42 x 45	6 q13	CD109 molecule
TC14002264.hg	184	TC14002264.hg		6.33919	0.771464	3.29875	-1.13035	0.838487	25.7938	0 .	45 x 45	14 q32	immunoglobulin heavy variable 7-34-1 (pseudogene)
TC16000395.hg	185	TC16000395.hg		8.77837	0.875851	3.29385	-1.49756	0.83104	25.0457	0 .	45 x 45	16 p11	immunoglobulin heavy variable 3/OR16-6 (pseudogene)
TC14002245.hg	186	TC14002245.hg		5.99905	0.7072	3.29351	-1.18208	0.723549	17.5712	0 .	45 x 44	CHR_HSCHR14_3_CTG1 q32	immunoglobulin heavy variable 1-3
TC03002264.hg	187	TC03002264.hg	RBMS3	5.96418	0.979506	3.2919	-2.3197	0.730584	17.9356	0 .	42 x 45	3 p24	RNA binding motif single stranded interacting protein 3
TC01004727.hg	188	TC01004727.hg	FCGR1B	5.83033	0.828479	3.28952	-1.31476	0.874464	30.2185	0 .	43 x 45	1 p11	Fc fragment of IgG receptor Ib
TC14002276.hg	189	TC14002276.hg		6.56643	0.768776	3.28301	-1.43196	0.820529	24.0631	0 .	45 x 45	14 q32	immunoglobulin heavy variable 4-59
TC01001161.hg	190	TC01001161.hg	FCGR1A	5.42391	0.815359	3.2798	-1.32303	0.865405	28.9516	0 .	43 x 45	1 q21	Fc fragment of IgG receptor Ic, pseudogene
TC04001304.hg	191	TC04001304.hg	CXCL9	7.2054	1.29533	3.27139	-2.83646	0.634418	13.758	0 .	45 x 45	4 q21	C-X-C motif chemokine ligand 9
TC07001293.hg	192	TC07001293.hg	SFRP4	6.89823	1.08225	3.26707	-1.92016	0.735795	18.2133	0 .	42 x 45	7 p14	secreted frizzled related protein 4
TC19002512.hg	193	TC19002512.hg		9.2141	0.970787	3.26663	-1.45061	0.780934	20.9583	0 .	45 x 43
TC6_ssto_hap7000165.hg	194	TC6_ssto_hap7000165.hg	HLA-DQB1	7.43468	0.962353	3.26578	-2.08668	0.853003	27.3976	0 .	44 x 45	CHR_HSCHR6_MHC_SSTO_CTG1	major histocompatibility complex, class II, DQ beta 1
TC05000159.hg	195	TC05000159.hg	IL7R	6.56972	1.23035	3.25019	-2.61484	0.846765	26.6827	0 .	45 x 45	5 p13	interleukin 7 receptor
TC12002617.hg	196	TC12002617.hg	P2RX7	6.09439	0.825578	3.2462	-1.47027	0.851849	27.2622	0 .	43 x 45	12 q24	purinergic receptor P2X 7
TC13001260.hg	197	TC13001260.hg	ITGBL1	5.68541	1.2888	3.24095	-2.57888	0.771591	20.333	0 .	43 x 45	13 q33	integrin subunit beta like 1
TC12001216.hg	198	TC12001216.hg	OLR1	8.1681	1.29872	3.23689	-3.26751	0.729933	17.9014	0 .	43 x 45	12 p13	oxidized low density lipoprotein receptor 1
TC11000506.hg	199	TC11000506.hg	MS4A4A	6.85319	1.10988	3.23221	-1.88113	0.904952	35.6505	0 .	44 x 45	11 q12	membrane spanning 4-domains A4A
TC01003211.hg	200	TC01003211.hg	CTSK	7.37771	1.06046	3.22324	-2.12824	0.838664	25.8122	0 .	43 x 45	1 q21	cathepsin K
TC0X001100.hg	201	TC0X001100.hg	VSIG4	7.50576	1.00734	3.22188	-1.87295	0.839096	25.857	0 .	43 x 45	X q12	V-set and immunoglobulin domain containing 4
TC06003855.hg	202	TC06003855.hg	VNN2	5.15887	0.882562	3.21647	-1.46509	0.805519	22.7871	0 .	45 x 43	6 q23	vanin 2
TC17001341.hg	203	TC17001341.hg	EVI2B	5.62462	1.11277	3.21265	-2.44252	0.925919	41.0918	0 .	44 x 45	17 q11	novel protein
TC08002237.hg	204	TC08002237.hg	MSR1	8.32152	1.12808	3.2076	-2.60287	0.894562	33.5514	0 .	44 x 45	8 p22	macrophage scavenger receptor 1
TC17001243.hg	205	TC17001243.hg	MFAP4	7.98601	0.946444	3.19496	-1.32524	0.792865	21.8098	0 .	42 x 45	17 p11	microfibril associated protein 4
TC05003305.hg	206	TC05003305.hg	CD74	9.68593	1.19405	3.1908	-3.07584	0.898713	34.3533	0 .	44 x 45	5 q33	CD74 molecule
TC07002895.hg	207	TC07002895.hg		4.68571	1.08539	3.18435	-2.02441	0.785724	21.2926	0 .	45 x 44	7 p14	T cell receptor gamma variable 10 (non-functional)
TC12001309.hg	208	TC12001309.hg	BCAT1	6.56708	0.810407	3.17854	-1.35129	0.808814	23.0556	0 .	42 x 45	12 p12	branched chain amino acid transaminase 1
TC0X002155.hg	209	TC0X002155.hg	BTK	5.50119	1.00761	3.17174	-1.82154	0.926281	41.2048	0 .	44 x 45	X q22	Bruton tyrosine kinase
TC19002463.hg	210	TC19002463.hg	TYROBP	9.3913	1.05497	3.14962	-2.74218	0.872972	30.0012	0 .	44 x 45	19 q13	TYRO protein tyrosine kinase binding protein
TC22001243.hg	211	TC22001243.hg		7.37213	0.879421	3.1456	-1.58006	0.819038	23.93	0 .	45 x 45
TC20000893.hg	212	TC20000893.hg	PLTP	8.44714	0.892405	3.13984	-2.063	0.713337	17.0624	0 .	42 x 45	20 q13	phospholipid transfer protein
TC6_dbb_hap3000181.hg	213	TC6_dbb_hap3000181.hg	HLA-DQB1	7.63904	0.960176	3.13972	-1.8976	0.876398	30.5056	0 .	44 x 45	CHR_HSCHR6_MHC_SSTO_CTG1	major histocompatibility complex, class II, DQ beta 1
TC15000226.hg	214	TC15000226.hg	GREM1	8.55928	1.16659	3.1397	-2.58594	0.753641	19.2204	0 .	43 x 45	15 q13	gremlin 1, DAN family BMP antagonist
TC01002849.hg	215	TC01002849.hg	GBP4	6.87437	0.969713	3.13956	-2.33262	0.761157	19.6731	0 .	45 x 44	1 p22	guanylate binding protein 4
TC06003603.hg	216	TC06003603.hg	HLA-DQB1	7.60685	1.12355	3.13065	-2.18496	0.714744	17.1312	0 .	43 x 45	6 p21	major histocompatibility complex, class II, DQ beta 1
TC12000642.hg	217	TC12000642.hg	GLIPR1	7.40507	0.930664	3.12342	-2.43666	0.810828	23.2228	0 .	43 x 45	12 q21	GLI pathogenesis related 1
TC01001425.hg	218	TC01001425.hg	DDR2	6.03119	0.986247	3.11981	-2.26341	0.815615	23.63	0 .	42 x 45	1 q23	discoidin domain receptor tyrosine kinase 2
TC14002253.hg	219	TC14002253.hg		7.66975	0.749974	3.10865	-1.09294	0.814928	23.5707	0 .	45 x 45	CHR_HSCHR14_3_CTG1 q32	immunoglobulin heavy variable 3-16 (non-functional)
TC01001357.hg	220	TC01001357.hg	SLAMF8	6.96232	0.796583	3.10337	-1.28409	0.871509	29.7916	0 .	43 x 45	1 q23	SLAM family member 8
TC01002977.hg	221	TC01002977.hg	KCNA3	5.71601	0.838405	3.10278	-1.34174	0.905835	35.844	0 .	45 x 45	1 p13	potassium voltage-gated channel subfamily A member 3
TC01004802.hg	222	TC01004802.hg	DDR2	6.01749	0.986846	3.09999	-2.86256	0.811541	23.2825	0 .	42 x 45	1 q23	discoidin domain receptor tyrosine kinase 2
TC01003403.hg	223	TC01003403.hg	SLAMF6	5.73415	1.09412	3.09443	-1.8834	0.73411	18.1228	0 .	45 x 45	1 q23	SLAM family member 6
TC11001818.hg	224	TC11001818.hg	MPEG1	7.73975	1.10559	3.08614	-2.7003	0.892293	33.1318	0 .	44 x 45	11 q12	macrophage expressed 1
TC16000374.hg	225	TC16000374.hg	ITGAM	7.15272	0.779179	3.08441	-1.26534	0.829325	24.8798	0 .	42 x 45	16 p11	integrin subunit alpha M
TC01003405.hg	226	TC01003405.hg	CD84	6.49482	0.957141	3.07676	-1.66965	0.918809	39.0218	0 .	44 x 45	1 q23	CD84 molecule
TC19001458.hg	227	TC19001458.hg	TYROBP	10.2922	1.04423	3.07185	-2.59705	0.870705	29.6778	0 .	44 x 45	19 q13	TYRO protein tyrosine kinase binding protein
TC07001546.hg	228	TC07001546.hg	FGL2	7.76815	1.1639	3.06396	-3.50866	0.85256	27.3453	0 .	45 x 44	7 q11	fibrinogen like 2
TC03001651.hg	229	TC03001651.hg	CCDC80	7.79988	1.10626	3.06282	-2.66928	0.808221	23.0068	0 .	43 x 45	3 q13	coiled-coil domain containing 80
TC12001171.hg	230	TC12001171.hg	C3AR1	6.44028	0.896859	3.04595	-1.7241	0.898037	34.2195	0 .	43 x 45	12 p13	complement C3a receptor 1
TC0X001778.hg	231	TC0X001778.hg	GPR174	4.77271	1.15101	3.04422	-1.95931	0.872085	29.8736	0 .	45 x 45	X q21	G protein-coupled receptor 174
TC19000789.hg	232	TC19000789.hg	FPR3	7.22811	1.10856	3.04415	-2.80842	0.886374	32.0935	0 .	44 x 45	19 q13	formyl peptide receptor 3
TC01003500.hg	233	TC01003500.hg	SELL	5.36748	0.700794	3.0377	-1.16094	0.863249	28.6674	0 .	45 x 43	1 q24	selectin L
TC6_dbb_hap3000087.hg	234	TC6_dbb_hap3000087.hg	HLA-DQA1	7.16407	0.88464	3.03518	-1.68213	0.873517	30.0801	0 .	43 x 45	CHR_HSCHR6_MHC_COX_CTG1 p21	major histocompatibility complex, class II, DQ alpha 2
TC06001717.hg	235	TC06001717.hg	TREM1	6.61841	0.93522	3.03164	-1.93092	0.65783	14.6412	0 .	42 x 45	6 p21	triggering receptor expressed on myeloid cells 1
TC03001903.hg	236	TC03001903.hg	GPR171	4.42167	0.910808	3.01912	-1.38395	0.809867	23.1427	0 .	44 x 44	3 q25	G protein-coupled receptor 171
TC08000435.hg	237	TC08000435.hg	DNAJC5B	5.67198	0.741001	3.01731	-1.05299	0.774971	20.5553	0 .	42 x 45	8 q13	DnaJ heat shock protein family (Hsp40) member C5 beta
TC03002321.hg	238	TC03002321.hg	CCR5	6.07998	0.92387	3.01511	-1.64256	0.900976	34.8103	0 .	44 x 45	3 p21	C-C motif chemokine receptor 5 (gene/pseudogene)
TC21001069.hg	239	TC21001069.hg	SAMSN1	6.07372	0.970311	3.01403	-1.99172	0.888194	32.4045	0 .	44 x 45	21 q11	SAM domain, SH3 domain and nuclear localization signals 1
TC03000626.hg	240	TC03000626.hg	CD86	6.18713	0.905523	3.00976	-1.61205	0.909333	36.6362	0 .	43 x 45	3 q13	CD86 molecule
TC01005698.hg	241	TC01005698.hg		2.90133	0.921073	3.00695	-1.25444	0.861875	28.4896	0 .	45 x 44	1 p13	novel transcript
TC6_mcf_hap5000169.hg	242	TC6_mcf_hap5000169.hg	HLA-DRB4	8.74547	1.08327	3.00188	-2.7303	0.872522	29.9364	0 .	44 x 45	CHR_HSCHR6_MHC_SSTO_CTG1	major histocompatibility complex, class II, DR beta 4
TC22001311.hg	243	TC22001311.hg		6.40004	0.891647	2.99917	-2.87201	0.719287	17.356	0 .	42 x 45
TC6_cox_hap2000094.hg	244	TC6_cox_hap2000094.hg	HLA-DQA1	6.80465	0.915291	2.99333	-1.79855	0.880274	31.1005	0 .	43 x 45	CHR_HSCHR6_MHC_COX_CTG1 p21	major histocompatibility complex, class II, DQ alpha 2
TC14000523.hg	245	TC14000523.hg	GPR65	5.98216	0.933177	2.99329	-1.91351	0.924071	40.527	0 .	44 x 45	14 q31	G protein-coupled receptor 65
TC04000609.hg	246	TC04000609.hg	SYNPO2	6.26358	0.892838	2.99135	-1.65335	0.810154	23.1666	0 .	42 x 45	4 q26	synaptopodin 2
TC01003407.hg	247	TC01003407.hg	CD48	5.67685	0.786181	2.98935	-1.1843	0.890703	32.8452	0 .	44 x 44	1 q23	CD48 molecule
TC6_mann_hap4000078.hg	248	TC6_mann_hap4000078.hg	HLA-DQA1	7.00332	0.905182	2.98363	-1.88613	0.875486	30.3694	0 .	43 x 45	CHR_HSCHR6_MHC_COX_CTG1 p21	major histocompatibility complex, class II, DQ alpha 2
TC01002850.hg	249	TC01002850.hg	GBP5	6.17896	0.937676	2.96705	-1.55578	0.827551	24.7106	0 .	45 x 45	1 p22	guanylate binding protein 5
TC6_mann_hap4000159.hg	250	TC6_mann_hap4000159.hg	HLA-DRB4	9.0464	1.13086	2.96602	-2.85979	0.874047	30.1574	0 .	44 x 45	CHR_HSCHR6_MHC_SSTO_CTG1	major histocompatibility complex, class II, DR beta 4
TC0X000202.hg	251	TC0X000202.hg	GPR34	5.71573	0.959546	2.96289	-1.618	0.835191	25.457	0 .	43 x 45	X p11	G protein-coupled receptor 34
TC6_mann_hap4000158.hg	252	TC6_mann_hap4000158.hg	HLA-DRB1	9.57584	1.17184	2.95844	-2.94315	0.899679	34.5466	0 .	44 x 45	CHR_HSCHR6_MHC_COX_CTG1	major histocompatibility complex, class II, DR beta 1
TC6_mcf_hap5000168.hg	253	TC6_mcf_hap5000168.hg	HLA-DRB1	9.57584	1.17184	2.95844	-2.94315	0.899679	34.5466	0 .	44 x 45	CHR_HSCHR6_MHC_COX_CTG1	major histocompatibility complex, class II, DR beta 1
TC6_ssto_hap7000162.hg	254	TC6_ssto_hap7000162.hg	HLA-DRB1	9.57584	1.17184	2.95844	-2.94315	0.899679	34.5466	0 .	44 x 45	CHR_HSCHR6_MHC_COX_CTG1	major histocompatibility complex, class II, DR beta 1
TC02004985.hg	255	TC02004985.hg		5.40753	0.73246	2.956	-1.4711	0.78825	21.4729	0 .	45 x 45	2 p11	immunoglobulin kappa variable 1-12
TC02002378.hg	256	TC02002378.hg	CXCR4	8.35278	0.902271	2.94479	-2.27737	0.850284	27.081	0 .	43 x 45	2 q22	C-X-C motif chemokine receptor 4
TC16000939.hg	257	TC16000939.hg	IGSF6	6.41101	0.947375	2.94415	-1.96336	0.864965	28.8931	0 .	44 x 45	16 p12	immunoglobulin superfamily member 6
TC22000556.hg	258	TC22000556.hg		7.05871	0.883981	2.93804	-1.58929	0.822814	24.27	0 .	45 x 45
TC03001355.hg	259	TC03001355.hg	CCR1	5.4627	0.908078	2.93524	-1.96572	0.842387	26.2046	0 .	43 x 45	3 p21	C-C motif chemokine receptor 1
TC05000231.hg	260	TC05000231.hg	GZMA	5.58142	1.0157	2.93291	-1.72002	0.839488	25.898	0 .	45 x 45	5 q11	granzyme A
TC06001577.hg	261	TC06001577.hg	HLA-DOA	6.90503	0.751432	2.92992	-1.17586	0.878631	30.845	0 .	43 x 45	CHR_HSCHR6_MHC_DBB_CTG1 p21	major histocompatibility complex, class II, DO alpha
TC16000375.hg	262	TC16000375.hg	ITGAX	7.70749	0.755956	2.92926	-1.15222	0.822477	24.2393	0 .	42 x 45	16 p11	integrin subunit alpha X
TC6_ssto_hap7000171.hg	263	TC6_ssto_hap7000171.hg	HLA-DOA	6.72255	0.752265	2.92697	-1.30811	0.886929	32.1875	0 .	43 x 45	CHR_HSCHR6_MHC_DBB_CTG1 p21	major histocompatibility complex, class II, DO alpha
TC07001779.hg	264	TC07001779.hg		4.78575	0.816343	2.92226	-1.08234	0.86999	29.5773	0 .	43 x 45
TC01001622.hg	265	TC01001622.hg	RGS1	6.92745	1.24211	2.92051	-3.34979	0.770315	20.2502	0 .	44 x 45	1 q31	regulator of G protein signaling 1
TC12001705.hg	266	TC12001705.hg	CPM	6.69284	0.966165	2.9193	-1.48135	0.827873	24.7411	0 .	43 x 45	12 q15	carboxypeptidase M
TC6_mcf_hap5000226.hg	267	TC6_mcf_hap5000226.hg		7.17863	0.792115	2.912	-1.66689	0.884243	31.7382	0 .	43 x 45	CHR_HSCHR6_MHC_MANN_CTG1 p21	major histocompatibility complex, class II, DP beta 2 (pseudogene)
TC01001372.hg	268	TC01001372.hg	SLAMF7	5.75833	0.843987	2.90917	-1.44054	0.883506	31.6175	0 .	45 x 45	1 q23	SLAM family member 7
TC12001587.hg	269	TC12001587.hg	MMP19	6.49224	0.757212	2.89334	-1.1766	0.778729	20.8076	0 .	42 x 45	12 q13	matrix metallopeptidase 19
TC11002896.hg	270	TC11002896.hg	IL10RA	7.25788	0.897177	2.89186	-1.87532	0.925184	40.8645	0 .	44 x 45	11 q23	interleukin 10 receptor subunit alpha
TC6_mcf_hap5000079.hg	271	TC6_mcf_hap5000079.hg	HLA-DQA1	6.54544	0.782024	2.89168	-1.49027	0.867022	29.1688	0 .	43 x 45	CHR_HSCHR6_MHC_COX_CTG1 p21	major histocompatibility complex, class II, DQ alpha 2
TC19000729.hg	272	TC19000729.hg	CD37	7.17516	0.741551	2.88831	-1.18176	0.889371	32.6094	0 .	43 x 45	19 q13	CD37 molecule
TC12000092.hg	273	TC12000092.hg	CD4	7.25188	0.853212	2.88805	-1.64102	0.910796	36.9806	0 .	43 x 45	12 p13	CD4 molecule
TC6_dbb_hap3000187.hg	274	TC6_dbb_hap3000187.hg	HLA-DOA	6.67953	0.738766	2.88748	-1.20022	0.885785	31.9944	0 .	43 x 45	CHR_HSCHR6_MHC_DBB_CTG1 p21	major histocompatibility complex, class II, DO alpha
TC6_mann_hap4000169.hg	275	TC6_mann_hap4000169.hg	HLA-DOA	6.67953	0.738766	2.88748	-1.20022	0.885785	31.9944	0 .	43 x 45	CHR_HSCHR6_MHC_DBB_CTG1 p21	major histocompatibility complex, class II, DO alpha
TC07002499.hg	276	TC07002499.hg	SERPINE1	8.95415	1.00289	2.8813	-2.01881	0.659397	14.7028	0 .	44 x 43	7 q22	serpin family E member 1
TC6_apd_hap1000118.hg	277	TC6_apd_hap1000118.hg	HLA-DMA	7.82865	0.880132	2.85585	-1.46077	0.883067	31.5461	0 .	43 x 45	CHR_HSCHR6_MHC_DBB_CTG1 p21	major histocompatibility complex, class II, DM alpha
TC07001003.hg	278	TC07001003.hg	GIMAP7	6.74875	0.714014	2.85384	-1.283	0.884598	31.7967	0 .	44 x 43	7 q36	GTPase, IMAP family member 7
TC6_dbb_hap3000180.hg	279	TC6_dbb_hap3000180.hg	HLA-DRB1	10.4744	1.15711	2.84098	-3.01699	0.890241	32.7629	0 .	44 x 45	CHR_HSCHR6_MHC_COX_CTG1 p21	major histocompatibility complex, class II, DR beta 2
TC6_qbl_hap6000085.hg	280	TC6_qbl_hap6000085.hg	HLA-DQA1	6.5505	0.825243	2.83781	-1.64386	0.87575	30.4087	0 .	43 x 45	CHR_HSCHR6_MHC_COX_CTG1 p21	major histocompatibility complex, class II, DQ alpha 2
TC0X000171.hg	281	TC0X000171.hg	CYBB	8.88382	1.13838	2.83778	-3.11537	0.886867	32.1771	0 .	44 x 45	X p21	cytochrome b-245 beta chain
TC12001178.hg	282	TC12001178.hg	CLEC4E	4.76251	0.86993	2.83524	-1.37709	0.726149	17.7045	0 .	43 x 44	12 p13	C-type lectin domain family 4 member E
TC08000487.hg	283	TC08000487.hg	LY96	4.03928	0.87478	2.83131	-1.57111	0.914562	37.9058	0 .	43 x 45	8 q21	lymphocyte antigen 96
TC01000286.hg	284	TC01000286.hg	C1QC	8.43622	0.935088	2.82851	-2.18406	0.880961	31.2086	0 .	44 x 45	1 p36	complement C1q C chain
TC6_mcf_hap5000170.hg	285	TC6_mcf_hap5000170.hg	HLA-DQB1	6.93246	0.807533	2.82608	-1.54825	0.855897	27.7435	0 .	43 x 45	CHR_HSCHR6_MHC_MCF_CTG1	major histocompatibility complex, class II, DQ beta 1
TC01001382.hg	286	TC01001382.hg	FCER1G	7.93705	0.984038	2.81981	-2.72952	0.877331	30.6464	0 .	44 x 45	1 q23	Fc fragment of IgE receptor Ig
TC17001053.hg	287	TC17001053.hg	SCIMP	6.47724	0.732365	2.81823	-1.35591	0.895371	33.7041	0 .	43 x 44	17 p13	SLP adaptor and CSK interacting membrane protein
TC05001861.hg	288	TC05001861.hg	CD14	8.28166	0.965325	2.81466	-2.30431	0.843048	26.2757	0 .	45 x 43	5 q31	CD14 molecule
TC09000038.hg	289	TC09000038.hg	PDCD1LG2	6.00937	0.729057	2.81349	-1.45455	0.891325	32.9565	0 .	43 x 45	9 p24	programmed cell death 1 ligand 2
TC05002968.hg	290	TC05002968.hg	FYB1	6.95043	1.08709	2.8	-2.51123	0.911732	37.2054	0 .	45 x 45	5 p13	FYN binding protein 1
TC06002113.hg	291	TC06002113.hg	MOXD1	6.23422	1.09052	2.79615	-2.07253	0.889331	32.6025	0 .	45 x 45	6 q23	monooxygenase DBH like 1
TC6_dbb_hap3000210.hg	292	TC6_dbb_hap3000210.hg	HLA-DMA	7.80593	0.868449	2.79005	-1.44566	0.881714	31.3283	0 .	43 x 45	CHR_HSCHR6_MHC_DBB_CTG1 p21	major histocompatibility complex, class II, DM alpha
TC03000800.hg	293	TC03000800.hg	CPA3	5.27879	1.00918	2.78158	-1.85186	0.70865	16.8365	0 .	44 x 45	3 q24	carboxypeptidase A3
TC0X001292.hg	294	TC0X001292.hg		10.0369	1.12796	2.77448	-4.46484	0.676911	15.4159	0 .	42 x 45	X q23	small nucleolar RNA, H/ACA box 35B
TC01006338.hg	295	TC01006338.hg	FCGR2B	6.82544	0.923543	2.7744	-1.57171	0.835623	25.5007	0 .	43 x 45	1 q23	Fc fragment of IgG receptor IIb
TC02004620.hg	296	TC02004620.hg	ZEB2	6.39262	0.992617	2.76958	-2.44557	0.876267	30.4859	0 .	43 x 45	2 q22	zinc finger E-box binding homeobox 2
TC12001804.hg	297	TC12001804.hg	DCN	7.95427	1.03807	2.76838	-3.26465	0.830375	24.9812	0 .	43 x 45	12 q21	decorin
TC11003451.hg	298	TC11003451.hg	MS4A7	7.4047	1.10269	2.76711	-2.44772	0.895881	33.8012	0 .	44 x 45	11 q12	membrane spanning 4-domains A7
TC06001773.hg	299	TC06001773.hg	PLA2G7	7.38258	0.986967	2.76442	-2.22051	0.817858	23.8258	0 .	43 x 45	6 p12	phospholipase A2 group VII
TC01002441.hg	300	TC01002441.hg	LAPTM5	10.0203	1.06766	2.76184	-3.17371	0.864278	28.8023	0 .	44 x 45	1 p35	lysosomal protein transmembrane 5
TC22001248.hg	301	TC22001248.hg		7.21781	0.765662	2.75835	-1.12861	0.790183	21.6128	0 .	45 x 45
TC17001798.hg	302	TC17001798.hg	PECAM1	7.16544	0.79691	2.75746	-2.39589	0.853425	27.4474	0 .	43 x 45	17 q23	platelet and endothelial cell adhesion molecule 1
TC6_ssto_hap7000080.hg	303	TC6_ssto_hap7000080.hg	HLA-DQA1	6.39423	0.783896	2.75658	-1.56391	0.874969	30.2928	0 .	43 x 45	CHR_HSCHR6_MHC_COX_CTG1 p21	major histocompatibility complex, class II, DQ alpha 2
TC10001212.hg	304	TC10001212.hg		6.82507	0.886627	2.75512	-1.54085	0.798909	22.2664	0 .	45 x 43
TC05001638.hg	305	TC05001638.hg	ST8SIA4	5.83842	0.818936	2.75453	-1.70323	0.899967	34.6047	0 .	43 x 45	5 q21	ST8 alpha-N-acetyl-neuraminide alpha-2,8-sialyltransferase 4
TC0X000807.hg	306	TC0X000807.hg	MXRA5	8.10229	1.02115	2.74896	-2.53787	0.741817	18.5432	0 .	42 x 45	X p22	matrix remodeling associated 5
TC14000070.hg	307	TC14000070.hg	RNASE6	6.7423	0.908633	2.74434	-1.94689	0.846995	26.7084	0 .	43 x 45	14 q11	ribonuclease A family member k6
TC22001008.hg	308	TC22001008.hg	IGLL5	7.00467	0.927587	2.74262	-2.18204	0.84178	26.1398	0 .	45 x 45	22 q11	immunoglobulin lambda like polypeptide 5
TC06001570.hg	309	TC06001570.hg	HLA-DQB1	6.87903	0.865701	2.73468	-1.46142	0.673825	15.2869	0 .	42 x 45	6 p21	major histocompatibility complex, class II, DQ beta 1
TC6_apd_hap1000047.hg	310	TC6_apd_hap1000047.hg	HLA-DQA1	7.10865	0.907487	2.72856	-1.97074	0.886462	32.1084	0 .	43 x 45	CHR_HSCHR6_MHC_COX_CTG1 p21	major histocompatibility complex, class II, DQ alpha 2
TC6_qbl_hap6000189.hg	311	TC6_qbl_hap6000189.hg	HLA-DOA	6.72412	0.684889	2.72449	-1.11033	0.877664	30.6969	0 .	42 x 45	CHR_HSCHR6_MHC_DBB_CTG1 p21	major histocompatibility complex, class II, DO alpha
TC01001347.hg	312	TC01001347.hg	PYHIN1	4.37979	0.731195	2.7199	-0.96734	0.856108	27.7691	0 .	43 x 44	1 q23	pyrin and HIN domain family member 1
TC06001057.hg	313	TC06001057.hg	STX11	6.40452	0.738933	2.71815	-1.41933	0.894581	33.555	0 .	43 x 45	6 q24	syntaxin 11
TC15000796.hg	314	TC15000796.hg	TM6SF1	6.55473	0.761222	2.71082	-1.10911	0.869758	29.5449	0 .	42 x 45	15 q25	transmembrane 6 superfamily member 1
TC12000467.hg	315	TC12000467.hg	NCKAP1L	7.14801	0.93616	2.704	-1.85372	0.936243	44.6682	0 .	44 x 45	12 q13	NCK associated protein 1 like
TC17000406.hg	316	TC17000406.hg	CCL18	7.88489	1.23043	2.68961	-2.57	0.703509	16.5937	0 .	44 x 45	CHR_HSCHR17_7_CTG4 q12	C-C motif chemokine ligand 18
TC06000403.hg	317	TC06000403.hg	HLA-DQA1	6.25352	0.775803	2.68689	-1.49891	0.875992	30.4448	0 .	43 x 45	CHR_HSCHR6_MHC_COX_CTG1 p21	major histocompatibility complex, class II, DQ alpha 2
TC01003616.hg	318	TC01003616.hg	NCF2	6.84883	0.744448	2.67791	-1.28733	0.790873	21.6632	0 .	42 x 45	1 q25	neutrophil cytosolic factor 2
TC04002616.hg	319	TC04002616.hg	HPSE	4.877	0.782342	2.6678	-1.58322	0.742439	18.5779	0 .	42 x 45	4 q21	heparanase
TC6_mann_hap4000161.hg	320	TC6_mann_hap4000161.hg	HLA-DRB4	9.37983	1.02381	2.66714	-2.71438	0.880095	31.0723	0 .	44 x 45	CHR_HSCHR6_MHC_SSTO_CTG1	major histocompatibility complex, class II, DR beta 4
TC07000735.hg	321	TC07000735.hg	CPED1	5.84593	0.845003	2.66314	-1.60988	0.751477	19.0934	0 .	44 x 43	7 q31	cadherin like and PC-esterase domain containing 1
TC01000978.hg	322	TC01000978.hg	C1orf162	6.46213	0.7763	2.65772	-1.50613	0.896319	33.8852	0 .	43 x 45	1 p13	chromosome 1 open reading frame 162
TC6_mann_hap4000214.hg	323	TC6_mann_hap4000214.hg		6.04988	0.698755	2.65636	-1.2614	0.905445	35.7582	0 .	43 x 45	CHR_HSCHR6_MHC_MANN_CTG1 p21	major histocompatibility complex, class II, DP beta 2 (pseudogene)
TC6_qbl_hap6000211.hg	324	TC6_qbl_hap6000211.hg		6.04988	0.698755	2.65636	-1.2614	0.905445	35.7582	0 .	43 x 45	CHR_HSCHR6_MHC_MANN_CTG1 p21	major histocompatibility complex, class II, DP beta 2 (pseudogene)
TC01006307.hg	325	TC01006307.hg	FCGR3A	6.71177	0.845053	2.64892	-1.96775	0.831524	25.093	0 .	43 x 45	1 q23	Fc fragment of IgG receptor IIIa
TC07002675.hg	326	TC07002675.hg	GIMAP4	6.33314	1.10158	2.64152	-2.87027	0.880439	31.1263	0 .	45 x 44	7 q36	GTPase, IMAP family member 4
TC11001839.hg	327	TC11001839.hg	MS4A6A	6.39297	1.00347	2.6383	-2.12759	0.9136	37.664	0 .	44 x 45	11 q12	membrane spanning 4-domains A6A
TC18000566.hg	328	TC18000566.hg	CD226	5.03668	0.676034	2.63543	-1.12138	0.879908	31.0431	0 .	43 x 44	18 q22	CD226 molecule
TC01001581.hg	329	TC01001581.hg	NPL	6.26302	0.770485	2.63333	-1.27023	0.853637	27.4725	0 .	43 x 45	1 q25	N-acetylneuraminate pyruvate lyase
TC6_mcf_hap5000176.hg	330	TC6_mcf_hap5000176.hg	HLA-DOA	6.7788	0.685307	2.63037	-1.0665	0.876776	30.5624	0 .	42 x 45	CHR_HSCHR6_MHC_DBB_CTG1 p21	major histocompatibility complex, class II, DO alpha
TC07000144.hg	331	TC07000144.hg	GPNMB	8.57967	1.05861	2.62539	-2.53083	0.881069	31.2258	0 .	43 x 45	7 p15	glycoprotein nmb
TC19000699.hg	332	TC19000699.hg	EMP3	8.61689	0.862131	2.61971	-1.91607	0.844308	26.4122	0 .	43 x 45	19 q13	epithelial membrane protein 3
TC12001507.hg	333	TC12001507.hg	BIN2	6.48878	0.729415	2.61491	-1.17999	0.923767	40.4359	0 .	43 x 45	12 q13	bridging integrator 2
TC6_cox_hap2000201.hg	334	TC6_cox_hap2000201.hg	HLA-DOA	6.81055	0.68448	2.61404	-1.12722	0.879123	30.921	0 .	42 x 45	CHR_HSCHR6_MHC_DBB_CTG1 p21	major histocompatibility complex, class II, DO alpha
TC12001202.hg	335	TC12001202.hg	KLRB1	5.51907	1.09748	2.60502	-2.01139	0.868503	29.3711	0 .	45 x 45	12 p13	killer cell lectin like receptor B1
TC01001346.hg	336	TC01001346.hg	MNDA	6.21849	0.813502	2.60211	-1.61503	0.902124	35.048	0 .	43 x 45	1 q23	myeloid cell nuclear differentiation antigen
TC06002112.hg	337	TC06002112.hg	CCN2	9.40067	0.948912	2.5892	-2.04743	0.751695	19.1062	0 .	42 x 45	6 q23	cellular communication network factor 2
TC01000904.hg	338	TC01000904.hg	VCAM1	7.33117	1.05319	2.58501	-2.98978	0.849536	26.9953	0 .	43 x 45	1 p21	vascular cell adhesion molecule 1
TC10002107.hg	339	TC10002107.hg	SRGN	9.44488	1.02779	2.58344	-2.61956	0.880829	31.1878	0 .	44 x 45	10 q22	serglycin
TC06002733.hg	340	TC06002733.hg		6.37342	0.712948	2.58252	-1.39528	0.901841	34.9889	0 .	43 x 45	CHR_HSCHR6_MHC_MANN_CTG1 p21	major histocompatibility complex, class II, DP beta 2 (pseudogene)
TC07003044.hg	341	TC07003044.hg	CACNA2D1	4.8815	0.892732	2.57388	-2.42937	0.789868	21.5899	0 .	42 x 45	7 q21	calcium voltage-gated channel auxiliary subunit alpha2delta 1
TC02001860.hg	342	TC02001860.hg	CCDC88A	6.63008	0.917524	2.57242	-2.0507	0.893294	33.3153	0 .	43 x 45	2 p16	coiled-coil domain containing 88A
TC12000730.hg	343	TC12000730.hg	PLXNC1	6.7939	0.908962	2.56937	-1.82347	0.905133	35.6899	0 .	43 x 45	12 q22	plexin C1
TC05001295.hg	344	TC05001295.hg	FYB1	6.60945	0.945886	2.56869	-1.95551	0.933834	43.7618	0 .	44 x 45	5 p13	FYN binding protein 1
TC12002520.hg	345	TC12002520.hg	PLXNC1	6.79184	0.96467	2.56575	-2.30197	0.897256	34.0665	0 .	44 x 45	12 q22	plexin C1
TC06000400.hg	346	TC06000400.hg	HLA-DQA1	6.92019	0.880368	2.56067	-1.63168	0.78473	21.2225	0 .	43 x 45	6 p21	major histocompatibility complex, class II, DQ alpha 1
TC12002552.hg	347	TC12002552.hg	CHST11	7.57972	0.931351	2.55925	-2.19089	0.838015	25.745	0 .	43 x 45	12 q23	carbohydrate sulfotransferase 11
TC07000643.hg	348	TC07000643.hg	SERPINE1	8.75535	0.98855	2.54977	-2.30196	0.6582	14.6557	0 .	44 x 43	7 q22	serpin family E member 1
TC05002050.hg	349	TC05002050.hg	LCP2	6.83051	0.745405	2.54909	-1.41539	0.922991	40.206	0 .	43 x 45	5 q35	lymphocyte cytosolic protein 2
TC17002747.hg	350	TC17002747.hg	PECAM1	8.4012	0.819449	2.54696	-1.94484	0.883609	31.6343	0 .	43 x 45	17 q23	platelet and endothelial cell adhesion molecule 1
TC6_apd_hap1000124.hg	351	TC6_apd_hap1000124.hg		6.0236	0.668242	2.54123	-1.20087	0.901682	34.956	0 .	43 x 44	CHR_HSCHR6_MHC_APD_CTG1 p21	major histocompatibility complex, class II, DP beta 2 (pseudogene)
TC10001073.hg	352	TC10001073.hg		7.80858	0.747874	2.53464	-1.62638	0.836582	25.598	0 .	42 x 45	10 p13	novel transcript
TC07001562.hg	353	TC07001562.hg	HGF	5.6922	0.792719	2.53354	-1.5212	0.81157	23.285	0 .	44 x 43	7 q21	hepatocyte growth factor
TC6_ssto_hap7000086.hg	354	TC6_ssto_hap7000086.hg		5.81254	0.649528	2.5329	-1.07652	0.896597	33.9387	0 .	43 x 44	CHR_HSCHR6_MHC_MANN_CTG1 p21	major histocompatibility complex, class II, DP beta 2 (pseudogene)
TC09001516.hg	355	TC09001516.hg	TNFSF8	5.50366	0.687557	2.52161	-1.06858	0.88651	32.1166	0 .	43 x 44	9 q33	TNF superfamily member 8
TC14001926.hg	356	TC14001926.hg	SLC7A7	7.30088	0.760779	2.51805	-2.04757	0.723084	17.5475	0 .	42 x 45	14 q11	solute carrier family 7 member 7
TC11001365.hg	357	TC11001365.hg		6.09899	0.764634	2.51547	-1.56146	0.834603	25.398	0 .	44 x 44	11 p15	GTPase, very large interferon inducible pseudogene 1
TC05000179.hg	358	TC05000179.hg	OSMR	7.19349	0.772677	2.51541	-1.99561	0.831671	25.1074	0 .	42 x 45	5 p13	oncostatin M receptor
TC01006308.hg	359	TC01006308.hg	FCGR3B	7.00193	0.708466	2.5128	-1.3741	0.789004	21.5273	0 .	42 x 45	1 q23	Fc fragment of IgG receptor IIIb
TC08001007.hg	360	TC08001007.hg		6.17662	0.746814	2.50434	-1.20923	0.878399	30.8094	0 .	42 x 45
TC05000929.hg	361	TC05000929.hg	DOCK2	6.6946	0.815711	2.50214	-1.28391	0.931265	42.8465	0 .	43 x 45	5 q35	dedicator of cytokinesis 2
TC01003624.hg	362	TC01003624.hg	NIBAN1	6.74348	0.9232	2.50109	-1.79164	0.897415	34.0976	0 .	43 x 45	1 q25	niban apoptosis regulator 1
TC6_dbb_hap3000179.hg	363	TC6_dbb_hap3000179.hg	HLA-DRB1	7.5182	0.74828	2.49135	-1.91593	0.866127	29.0481	0 .	43 x 45	CHR_HSCHR6_MHC_DBB_CTG1	major histocompatibility complex, class II, DR beta 1
TC04002931.hg	364	TC04002931.hg	PDGFRA	7.46678	0.983601	2.49119	-2.12323	0.81401	23.4919	0 .	43 x 45	4 q12	platelet derived growth factor receptor alpha
TC15001719.hg	365	TC15001719.hg	BCL2A1	5.98239	0.786686	2.48878	-1.47641	0.773042	20.4279	0 .	42 x 45	15 q25	BCL2 related protein A1
TC6_cox_hap2000229.hg	366	TC6_cox_hap2000229.hg		5.77832	0.654171	2.48786	-1.17042	0.901112	34.8383	0 .	43 x 44	CHR_HSCHR6_MHC_MANN_CTG1 p21	major histocompatibility complex, class II, DP beta 2 (pseudogene)
TC07001004.hg	367	TC07001004.hg	GIMAP4	6.88065	0.748946	2.47942	-1.6866	0.920939	39.6138	0 .	44 x 44	7 q36	GTPase, IMAP family member 4
TC12001208.hg	368	TC12001208.hg	CLEC2B	4.89203	0.769371	2.47693	-1.32774	0.904301	35.5096	0 .	43 x 45	12 p13	C-type lectin domain family 2 member B
TC10000181.hg	369	TC10000181.hg	APBB1IP	6.44749	0.657636	2.47614	-1.03902	0.8878	32.3366	0 .	43 x 44	10 p12	amyloid beta precursor protein binding family B member 1 interacting protein
TC20000572.hg	370	TC20000572.hg	C20orf194	6.19763	0.75346	2.47597	-1.26181	0.876471	30.5166	0 .	42 x 45	20 p13	chromosome 20 open reading frame 194
TC05000839.hg	371	TC05000839.hg	GM2A	7.21734	0.690844	2.46643	-1.49714	0.847519	26.767	0 .	42 x 45	5 q33	GM2 ganglioside activator
TC12001162.hg	372	TC12001162.hg	CD163	7.78757	1.05517	2.4591	-2.12174	0.834052	25.3428	0 .	44 x 45	12 p13	CD163 molecule
TC01001551.hg	373	TC01001551.hg	SOAT1	7.6315	0.845388	2.45536	-2.29613	0.777022	20.6923	0 .	43 x 45	1 q25	sterol O-acyltransferase 1
TC01001640.hg	374	TC01001640.hg	PTPRC	7.20685	1.07354	2.44434	-2.37309	0.947594	49.7206	0 .	45 x 45	1 q31	protein tyrosine phosphatase receptor type C
TC09000945.hg	375	TC09000945.hg	HACD4	5.56882	0.776651	2.44356	-1.21032	0.85534	27.6762	0 .	42 x 45	9 p21	3-hydroxyacyl-CoA dehydratase 4
TC13000364.hg	376	TC13000364.hg	ITGBL1	7.42026	0.919392	2.44316	-1.92554	0.780295	20.9145	0 .	42 x 45	13 q33	integrin subunit beta like 1
TC10000415.hg	377	TC10000415.hg	SRGN	9.1999	0.961693	2.43007	-2.37965	0.88621	32.0658	0 .	44 x 45	10 q22	serglycin
TC05003434.hg	378	TC05003434.hg	HAVCR2	6.19568	0.702514	2.42963	-1.08227	0.899191	34.4486	0 .	43 x 45	5 q33	hepatitis A virus cellular receptor 2
TC03001862.hg	379	TC03001862.hg	SLC9A9	5.87178	0.799421	2.42815	-1.29723	0.92631	41.2138	0 .	44 x 44	3 q24	solute carrier family 9 member A9
TC07001606.hg	380	TC07001606.hg	SAMD9L	7.25554	0.987069	2.41893	-2.4915	0.734294	18.1326	0 .	44 x 45	7 q21	sterile alpha motif domain containing 9 like
TC6_mann_hap4000160.hg	381	TC6_mann_hap4000160.hg	HLA-DRB1	7.58334	0.737673	2.41696	-1.8284	0.864939	28.8896	0 .	43 x 45	CHR_HSCHR6_MHC_DBB_CTG1	major histocompatibility complex, class II, DR beta 1
TC01000968.hg	382	TC01000968.hg	CD53	7.62787	0.960919	2.41371	-2.18008	0.937613	45.206	0 .	44 x 45	1 p13	CD53 molecule
TC20000587.hg	383	TC20000587.hg	RASSF2	7.02848	0.75296	2.41074	-1.29338	0.928654	41.9656	0 .	43 x 45	20 p13	Ras association domain family member 2
TC13000642.hg	384	TC13000642.hg	LCP1	7.25694	0.887496	2.40906	-1.88042	0.910767	36.9738	0 .	44 x 45	13 q14	lymphocyte cytosolic protein 1
TC02000904.hg	385	TC02000904.hg	ARHGAP15	5.66305	0.836069	2.40801	-1.45896	0.906824	36.0636	0 .	44 x 44	2 q22	Rho GTPase activating protein 15
TC0X000052.hg	386	TC0X000052.hg	TLR8	5.78746	0.653003	2.4062	-1.37765	0.882617	31.4732	0 .	43 x 44	X p22	toll like receptor 8
TC0X001551.hg	387	TC0X001551.hg	CLIC2	5.92727	0.734526	2.40173	-1.30456	0.904899	35.639	0 .	43 x 44	X q28	chloride intracellular channel 2
TC6_ssto_hap7000163.hg	388	TC6_ssto_hap7000163.hg	HLA-DRB4	9.23381	0.931086	2.40053	-2.57787	0.888152	32.3973	0 .	44 x 45	CHR_HSCHR6_MHC_SSTO_CTG1	major histocompatibility complex, class II, DR beta 4
TC17001378.hg	389	TC17001378.hg	CCL5	6.52689	0.805854	2.39847	-1.26447	0.887034	32.2055	0 .	44 x 45	CHR_HSCHR17_7_CTG4 q12	C-C motif chemokine ligand 5
TC11002344.hg	390	TC11002344.hg	JAML	6.19871	0.709978	2.39112	-1.18998	0.86834	29.3486	0 .	43 x 44	11 q23	junction adhesion molecule like
TC6_cox_hap2000232.hg	391	TC6_cox_hap2000232.hg	HLA-DMB	6.59775	0.743943	2.38915	-1.29457	0.901532	34.9249	0 .	43 x 45	CHR_HSCHR6_MHC_DBB_CTG1 p21	major histocompatibility complex, class II, DM beta
TC12000591.hg	392	TC12000591.hg	IRAK3	6.37675	0.842521	2.38225	-1.85004	0.837069	25.6478	0 .	43 x 45	12 q14	interleukin 1 receptor associated kinase 3
TC02001749.hg	393	TC02001749.hg	CYP1B1	6.49735	1.03582	2.38178	-2.59441	0.798664	22.2475	0 .	44 x 45	2 p22	cytochrome P450 family 1 subfamily B member 1
TC6_dbb_hap3000209.hg	394	TC6_dbb_hap3000209.hg	HLA-DMB	6.54106	0.738937	2.37911	-1.29198	0.902708	35.1702	0 .	43 x 45	CHR_HSCHR6_MHC_DBB_CTG1 p21	major histocompatibility complex, class II, DM beta
TC6_qbl_hap6000236.hg	395	TC6_qbl_hap6000236.hg	HLA-DMB	6.55088	0.739396	2.3752	-1.29295	0.903239	35.2825	0 .	43 x 45	CHR_HSCHR6_MHC_DBB_CTG1 p21	major histocompatibility complex, class II, DM beta
TC01004781.hg	396	TC01004781.hg	IFI16	8.86375	1.00248	2.37135	-2.99823	0.806808	22.8914	0 .	44 x 45	1 q23	interferon gamma inducible protein 16
TC19002629.hg	397	TC19002629.hg	IFI30	10.3631	0.921275	2.3685	-2.36426	0.778329	20.7805	0 .	43 x 45	19 p13	IFI30 lysosomal thiol reductase
TC17000103.hg	398	TC17000103.hg	CD68	10.0667	0.780672	2.3685	-2.15946	0.794193	21.9086	0 .	42 x 45	17 p13	CD68 molecule
TC03000563.hg	399	TC03000563.hg	CD96	5.93266	0.955834	2.36827	-1.59329	0.90684	36.0672	0 .	45 x 45	3 q13	CD96 molecule
TC6_cox_hap2000193.hg	400	TC6_cox_hap2000193.hg	HLA-DRB1	10.1797	0.964063	2.36402	-2.9886	0.7782	20.7718	0 .	43 x 45	CHR_HSCHR6_MHC_COX_CTG1	major histocompatibility complex, class II, DR beta 1
TC01005718.hg	401	TC01005718.hg	PTPN22	6.63527	0.848575	2.35873	-1.75157	0.886275	32.0769	0 .	43 x 45	1 p13	protein tyrosine phosphatase non-receptor type 22
TC6_mcf_hap5000230.hg	402	TC6_mcf_hap5000230.hg	HLA-DMB	6.53498	0.732226	2.35643	-1.26841	0.901529	34.9242	0 .	43 x 45	CHR_HSCHR6_MHC_DBB_CTG1 p21	major histocompatibility complex, class II, DM beta
TC6_mann_hap4000209.hg	403	TC6_mann_hap4000209.hg	HLA-DMB	6.54356	0.732775	2.3557	-1.2849	0.903954	35.435	0 .	43 x 45	CHR_HSCHR6_MHC_DBB_CTG1 p21	major histocompatibility complex, class II, DM beta
TC16000349.hg	404	TC16000349.hg	ITGAL	6.63777	0.669727	2.35514	-1.22272	0.902599	35.1474	0 .	43 x 44	16 p11	integrin subunit alpha L
TC01006339.hg	405	TC01006339.hg		7.87633	0.915702	2.35206	-2.28966	0.866597	29.1113	0 .	43 x 45	1 q23	Fc fragment of IgG receptor IIc (gene/pseudogene)
TC6_apd_hap1000117.hg	406	TC6_apd_hap1000117.hg	HLA-DMB	6.56789	0.730828	2.35052	-1.26372	0.90319	35.2722	0 .	43 x 45	CHR_HSCHR6_MHC_DBB_CTG1 p21	major histocompatibility complex, class II, DM beta
TC13000741.hg	407	TC13000741.hg	KCTD12	7.5966	0.913078	2.34905	-2.4169	0.894432	33.5271	0 .	43 x 45	13 q22	potassium channel tetramerization domain containing 12
TC03001948.hg	408	TC03001948.hg	LXN	7.22891	0.861788	2.34848	-2.32626	0.733867	18.1098	0 .	42 x 45	3 q25	latexin
TC12000793.hg	409	TC12000793.hg	DRAM1	6.93821	0.768041	2.34539	-1.98594	0.760781	19.65	0 .	42 x 45	12 q23	DNA damage regulated autophagy modulator 1
TC02000620.hg	410	TC02000620.hg	IL1R1	7.13522	0.766053	2.33997	-1.9711	0.813852	23.4784	0 .	44 x 43	2 q11	interleukin 1 receptor type 1
TC6_qbl_hap6000182.hg	411	TC6_qbl_hap6000182.hg	HLA-DRB1	10.0052	0.943978	2.33979	-2.90442	0.783996	21.1709	0 .	43 x 45	CHR_HSCHR6_MHC_COX_CTG1	major histocompatibility complex, class II, DR beta 1
TC6_ssto_hap7000219.hg	412	TC6_ssto_hap7000219.hg	HLA-DMB	6.53157	0.727366	2.33886	-1.23936	0.902019	35.026	0 .	43 x 45	CHR_HSCHR6_MHC_DBB_CTG1 p21	major histocompatibility complex, class II, DM beta
TC20000821.hg	413	TC20000821.hg	SAMHD1	8.32085	0.880906	2.33842	-2.55732	0.824162	24.3937	0 .	44 x 44	20 q11	SAM and HD domain containing deoxynucleoside triphosphate triphosphohydrolase 1
TC11001058.hg	414	TC11001058.hg	IL10RA	7.0558	0.661423	2.3365	-1.23621	0.900423	34.6972	0 .	43 x 44	11 q23	interleukin 10 receptor subunit alpha
TC03000468.hg	415	TC03000468.hg	EPHA3	6.66697	0.976499	2.33614	-2.23793	0.737864	18.3256	0 .	42 x 45	3 p11	EPH receptor A3
TC02001867.hg	416	TC02001867.hg	EFEMP1	8.06277	0.83852	2.33149	-1.71644	0.789022	21.5286	0 .	42 x 45	2 p16	EGF containing fibulin extracellular matrix protein 1
TC12001215.hg	417	TC12001215.hg	CLEC7A	5.91912	0.744918	2.32958	-1.3111	0.87171	29.8202	0 .	43 x 45	12 p13	C-type lectin domain containing 7A
TC6_cox_hap2000202.hg	418	TC6_cox_hap2000202.hg	HLA-DPA1	8.89901	0.977154	2.3281	-2.45671	0.905439	35.7569	0 .	44 x 45	CHR_HSCHR6_MHC_DBB_CTG1 p21	major histocompatibility complex, class II, DP alpha 1
TC15002540.hg	419	TC15002540.hg	MYO5A	6.82478	0.840093	2.3258	-1.68081	0.907327	36.1767	0 .	43 x 45	15 q21	myosin VA
TC06004127.hg	420	TC06004127.hg	HLA-DMB	6.79051	0.700117	2.31915	-1.23547	0.899639	34.5386	0 .	43 x 45	CHR_HSCHR6_MHC_DBB_CTG1 p21	major histocompatibility complex, class II, DM beta
TC6_cox_hap2000233.hg	421	TC6_cox_hap2000233.hg	HLA-DMA	7.22129	0.735269	2.31865	-1.14561	0.876068	30.4561	0 .	43 x 45	CHR_HSCHR6_MHC_DBB_CTG1	major histocompatibility complex, class II, DM alpha
TC6_mann_hap4000210.hg	422	TC6_mann_hap4000210.hg	HLA-DMA	7.22129	0.735269	2.31865	-1.14561	0.876068	30.4561	0 .	43 x 45	CHR_HSCHR6_MHC_DBB_CTG1	major histocompatibility complex, class II, DM alpha
TC6_mcf_hap5000231.hg	423	TC6_mcf_hap5000231.hg	HLA-DMA	7.22129	0.735269	2.31865	-1.14561	0.876068	30.4561	0 .	43 x 45	CHR_HSCHR6_MHC_DBB_CTG1	major histocompatibility complex, class II, DM alpha
[truncated: 80 more rows]

## Sheet: SpotF
	Rank	ID	Symbol	mean expression	SD	max delta e	min delta e	correlation	->t.score	->p.value	Metagene	Chromosome	Description
[truncated: 280 more rows]
