# Supplementary material for: Transcriptomic Maps of Colorectal Liver Metastasis: Machine Learning of Gene Activation Patterns and Epigenetic Trajectories in Support of Precision Medicine
Source: Cancers (Basel). 2023 Jul 28;15(15):3835. doi: 10.3390/cancers15153835 (PMC10417131; doi:10.3390/cancers15153835)
Supplement: Supplementary file 1 [file cancers-15-03835-s001.zip › Suppl-Table-S3. GeneSetCollection_Livermets-CRCl.xlsx]

## Sheet: Master
Names	Type	Citation	Ensemble_ID	Gene_Symbol
Che_LM_scRNA-markers_Tcells	scMarkers	PMID_34489408	ENSG00000173110,ENSG00000117632,ENSG00000237724,ENSG00000232804,ENSG00000132002,ENSG00000186827,ENSG00000235067,ENSG00000123416,ENSG00000164104,ENSG00000186891,ENSG00000156234,ENSG00000080824,ENSG00000156234,ENSG00000156127,ENSG00000100453,ENSG00000198830,ENSG00000134460,ENSG00000115541,ENSG00000173207,ENSG00000111537,ENSG00000176890,ENSG00000175063,ENSG00000106211,ENSG00000144381,ENSG00000120694…	HSPA6,STMN1,HSPA1A,HSPA1B,DNAJB1,TNFRSF4,TUBB,TUBA1B,HMGB2,HIST1H4C,TNFRSF18,KIAA0101,CXCL13,HSP90AA1,CXCL13,BATF,GZMB,HMGN2,IL2RA,HSPE1,CKS1B,IFNG,TYMS,UBE2C,HSPB1,AC133644.2,HSPD1,HSPH1,HSPE1,HSPA1A,LTB,CACYBP,CACYBP,HSPD1,MKI67,PTTG1,FAM3C,ZFAND2A,BIRC5,HSPB1,AC092580.4,CTLA4,NUSAP1,CCL4L2,HSP90AA1,HSPA8,GNLY,HMGB1,TIGIT,DUT,HSPH1,RGS2,PCNA,CENPF,RGS2,BAG3,ZFAND2A,CCL4,NEU1,CCL5,RRM2,TK1,DNAJB…
Che_LM_scRNA-markers_NKcells	scMarkers	PMID_34489408	ENSG00000137441,ENSG00000105374,ENSG00000115523,ENSG00000180644,ENSG00000187118,ENSG00000100450,ENSG00000134539,ENSG00000211829,ENSG00000203747,ENSG00000150045,ENSG00000077984,ENSG00000159674,ENSG00000172543,ENSG00000142347,ENSG00000171476,ENSG00000100453,ENSG00000169583,ENSG00000197540,ENSG00000198821,ENSG00000110934,ENSG00000145287,ENSG00000160255,ENSG00000101474,ENSG00000007264,ENSG00000142634…	FGFBP2,NKG7,GNLY,PRF1,CMC1,GZMH,KLRD1,TRDC,FCGR3A,KLRF1,CST7,SPON2,CTSW,MYO1F,HOPX,GZMB,CLIC3,GZMM,CD247,BIN2,PLAC8,ITGB2,APMAP,MATK,EFHD2,ABHD17A,S1PR5,CCL5,FCRL6,KLRG1,HCST,AES,ADGRG1,C1orf21,LYAR,SUN2,C12orf75,TTC38,CHST12,TPST2,CCND3,GZMA,RP5-1171I10.5,KLRB1,PLEK,PPP2R5C,HLA-C,MYO1G,ARPC5L,LITAF,IFITM2,FLNA,TYROBP,MYL12A,RASSF1,RAP1B,C5orf56,CD7,IFITM1,CYBA,LAIR2,SAMD3,TRGC2,FYN,PPP1CA,MAPK1,…
Che_LM_scRNA-markers_Myeloidcells	scMarkers	PMID_34489408	ENSG00000163220,ENSG00000143546,ENSG00000130203,ENSG00000169429,ENSG00000130208,ENSG00000118785,ENSG00000090382,ENSG00000081041,ENSG00000125538,ENSG00000173372,ENSG00000163734,ENSG00000090382,ENSG00000173369,ENSG00000087086,ENSG00000163221,ENSG00000235915,ENSG00000085265,ENSG00000277263,ENSG00000158869,ENSG00000102265,ENSG00000101439,ENSG00000236693,ENSG00000159189,ENSG00000277796,ENSG00000278567…	S100A9,S100A8,APOE,CXCL8,APOC1,SPP1,LYZ,CXCL2,IL1B,C1QA,CXCL3,LYZ,C1QB,FTL,S100A12,LST1,FCN1,HLA-DRA,FCER1G,TIMP1,CST3,HLA-DPB1,C1QC,CCL3L3,CCL3,TYROBP,AIF1,SOD2,HLA-DQB1,HLA-DPA1,PLAUR,CTSS,CST3,G0S2,CD74,NPC2,AIF1,CCL20,CTSB,HLA-DQA1,S100A9,CD68,GPX1,TYROBP,CST3,C15orf48,RP11-160E2.6,S100A8,CTSD,PSAP,HLA-DRA,IER3,CCL3L3,FTH1,HLA-DRB1,BCL2A1,CD14,HLA-DQA2,FCER1G,SERPINA1,IL1B,CSTA,EREG,LINC00936…
Che_LM_scRNA-markers_Bcells	scMarkers	PMID_34489408	ENSG00000105369,ENSG00000156738,ENSG00000019582,ENSG00000007312,ENSG00000277263,ENSG00000153064,ENSG00000278801,ENSG00000081189,ENSG00000128218,ENSG00000112149,ENSG00000159958,ENSG00000104894,ENSG00000206237,ENSG00000236693,ENSG00000140968,ENSG00000163683,ENSG00000247982,ENSG00000112799,ENSG00000228163,ENSG00000206301,ENSG00000225890,ENSG00000104921,ENSG00000228080,ENSG00000239463,ENSG00000112137…	CD79A,MS4A1,CD74,CD79B,HLA-DRA,BANK1,IGHD,MEF2C,VPREB3,CD83,TNFRSF13C,CD37,HLA-DQB1,HLA-DPB1,IRF8,SMIM14,LINC00926,LY86,HLA-DPA1,HLA-DQA2,HLA-DQA1,FCER2,HLA-DRB1,HLA-DMA,PHACTR1,HLA-DMB,ADAM28,BLK,RP1-313I6.12,CD22,GNG7,PKIG,YBX3,LY9,LAPTM5,POU2F2,ORAI2,EEF1B2,RPS23,RPS8,RPS5,SNX2,IFT57,CD55,TCOF1,DRAM2,RPL18A,RPS11,EZR,RPL21,FCMR,RPL8,RPL32,EEF2,RPS18,RPL11,RPL13A,LSM7,NCF1,LTB,RPS6,TMEM243,RPLP…
Che_LM_scRNA-markers_Plasmacells	scMarkers	PMID_34489408	ENSG00000277633,ENSG00000211679,ENSG00000211677,ENSG00000211592,ENSG00000132465,ENSG00000282633,ENSG00000276173,ENSG00000282184,ENSG00000277016,ENSG00000274497,ENSG00000282657,ENSG00000211685,ENSG00000170476,ENSG00000254709,ENSG00000180879,ENSG00000274437,ENSG00000100219,ENSG00000134285,ENSG00000211640,ENSG00000105369,ENSG00000123131,ENSG00000051108,ENSG00000173486,ENSG00000167476,ENSG00000166562…	IGHG1,IGLC3,IGLC2,IGKC,JCHAIN,IGHA1,IGHA2,IGHG3,IGHG4,IGHG2,IGHM,IGLC7,MZB1,IGLL5,SSR4,DERL3,AL928768.3,XBP1,FKBP11,IGLV6-57,CD79A,PRDX4,HERPUD1,FKBP2,JSRP1,SEC11C,TNFRSF17,HSP90B1,IGKV1-12,SSR3,TRIB1,ITM2C,SDC1,MYDGF,ANKRD28,POU2AF1,SPCS2,SDF2L1,FCRL5,VIMP,UBE2J1,DUSP5,KIAA0125,MANF,PDIA4,TOR3A,HIST1H1C,GNG7,DNAJB9,CD38,CRELD2,SPAG4,PLPP5,SPCS3,RRBP1,RP11-290F5.1,PIM2,TPD52,LMAN1,SPCS1,PDIA6,CHP…
Che_LM_scRNA-markers_Epithelialcells	scMarkers	PMID_34489408	ENSG00000170421,ENSG00000111057,ENSG00000148671,ENSG00000275214,ENSG00000171345,ENSG00000189143,ENSG00000167644,ENSG00000163435,ENSG00000196754,ENSG00000148346,ENSG00000197956,ENSG00000233041,ENSG00000160180,ENSG00000165215,ENSG00000119888,ENSG00000169908,ENSG00000166920,ENSG00000160213,ENSG00000089356,ENSG00000125968,ENSG00000182718,ENSG00000267795,ENSG00000165828,ENSG00000163191,ENSG00000175315…	KRT8,KRT18,ADIRF,IFI27,KRT19,CLDN4,C19orf33,ELF3,S100A2,LCN2,S100A6,PHGR1,TFF3,CLDN3,EPCAM,TM4SF1,C15orf48,CSTB,FXYD3,ID1,ANXA2,SMIM22,PRAP1,S100A11,CST6,TSPAN8,PERP,IFITM3,S100A10,MDK,LGALS3,IGFBP6,SPINT2,CD9,SAA1,PHLDA2,SLPI,AGR2,GPRC5A,ZFAS1,CALB1,CXCL1,TXN,GSTP1,PPDPF,IER3,HES1,TPM2,CD59,H1F0,LGALS4,TACSTD2,CAV1,CDA,SFN,DSTN,S100A13,DMKN,PRSS3,MIA,S100A16,WFDC2,CD24,SLC39A4,GPX2,S100P,MMP7,MI…
Che_LM_scRNA-markers_CAF/Endothelialcells	scMarkers	PMID_34489408	ENSG00000111341,ENSG00000163453,ENSG00000011465,ENSG00000139329,ENSG00000149591,ENSG00000108821,ENSG00000164692,ENSG00000189058,ENSG00000145423,ENSG00000113140,ENSG00000168542,ENSG00000145824,ENSG00000077942,ENSG00000122786,ENSG00000107796,ENSG00000148180,ENSG00000101335,ENSG00000152583,ENSG00000274619,ENSG00000142089,ENSG00000106538,ENSG00000182492,ENSG00000182326,ENSG00000141753,ENSG00000282307…	MGP,IGFBP7,DCN,LUM,TAGLN,COL1A1,COL1A2,APOD,SFRP2,SPARC,COL3A1,CTGF,CXCL14,FBLN1,CALD1,ACTA2,GSN,MYL9,CYR61,SPARCL1,CFD,IFITM3,RARRES2,BGN,C1S,IGFBP4,SERPINF1,C1R,COL6A2,IGFBP5,MMP2,TIMP1,PTGDS,HES1,NNMT,EGR1,SERPING1,TPM2,CCDC80,SOD3,ADIRF,MFAP4,C11orf96,SFRP4,CCL2,ID3,CLU,TSC22D1,CTHRC1,TIMP3,TPM1,SELM,COL6A3,ID1,MT2A,C7,COL6A1,C3,CNN3,DSTN,NUPR1,IGFBP6,THY1,IFI27,GNG11,NBL1,AEBP1,MFGE8,PCOLCE,…
Che_LM_scRNA-markers_Mastcells	scMarkers	PMID_34489408	ENSG00000197253,ENSG00000172236,ENSG00000163751,ENSG00000100448,ENSG00000120885,ENSG00000163106,ENSG00000283887,ENSG00000149534,ENSG00000010278,ENSG00000165646,ENSG00000179348,ENSG00000110002,ENSG00000164120,ENSG00000135404,ENSG00000068697,ENSG00000127074,ENSG00000169189,ENSG00000042493,ENSG00000135821,ENSG00000160789,ENSG00000115602,ENSG00000109321,ENSG00000140287,ENSG00000158869,ENSG00000137575…	TPSB2,TPSAB1,CPA3,CTSG,CLU,HPGDS,LTC4S,MS4A2,CD9,SLC18A2,GATA2,VWA5A,HPGD,CD63,LAPTM4A,RGS13,RP11-354E11.2,NSMCE1,C1orf186,CAPG,GLUL,LMNA,IL1RL1,AREG,HDC,FCER1G,SDCBP,TSC22D1,KIT,CTSD,MAOB,ALOX5AP,PTGS1,CNRIP1,VIM,ASAH1,HES1,FCER1A,PLIN2,TNFSF10,SKIL,DUSP10,DUSP6,LYL1,SVOPL,ALOX5,ALDH1A1,ACOT7,AC004791.2,ANXA1,ACSL4,AC020571.3,LAT2,BACE2,SAMSN1,GPR65,CD69,RRAD,TUBA1A,CTNNBL1,RGS2,BTK,GALC,CD82,PT…
Che_LM_scRNA-markers_pDCcells	scMarkers	PMID_34489408	ENSG00000107317,ENSG00000169508,ENSG00000100453,ENSG00000276561,ENSG00000276798,ENSG00000166428,ENSG00000282307,ENSG00000145287,ENSG00000109321,ENSG00000100721,ENSG00000106803,ENSG00000140968,ENSG00000137265,ENSG00000124766,ENSG00000173457,ENSG00000168675,ENSG00000169583,ENSG00000196628,ENSG00000106537,ENSG00000119508,ENSG00000019582,ENSG00000185291,ENSG00000119655,ENSG00000135916,ENSG00000274437…	PTGDS,GPR183,GZMB,IRF7,LILRA4,PLD4,SERPINF1,PLAC8,AREG,TCL1A,SEC61B,IRF8,IRF4,SOX4,PPP1R14B,LDLRAD4,CLIC3,TCF4,TSPAN13,NR4A3,CD74,IL3RA,NPC2,ITM2C,DERL3,MYBL2,PTPRS,PTCRA,LILRB4,RNASE6,SPIB,GNA15,HSP90B1,RAB11FIP1,ALOX5AP,RUBCN,CXCR3,SCT,GPX1,TXN,C12orf75,CLN8,SMPD3,CCDC50,HES4,CYB561A3,TRAF4,RGS2,THEMIS2,SPCS1,HLA-DQA2,APP,HLA-DQA1,LRRC26,HERPUD1,OPN3,PPP1R14A,GAS6,TPM2,CORO1C,HLA-DRA,SMIM3,SLC1…
Liu_LM_cluster_GM1	Liver cancer	PMID_32612211_ST7	ENSG00000175899,ENSG00000128274,ENSG00000157766,ENSG00000144476,ENSG00000107796,ENSG00000072110,ENSG00000115170,ENSG00000148848,ENSG00000135074,ENSG00000114948,ENSG00000149451,ENSG00000154734,ENSG00000281690,ENSG00000151388,ENSG00000138316,ENSG00000145536,ENSG00000158859,ENSG00000049192,ENSG00000136378,ENSG00000163638,ENSG00000156218,ENSG00000197381,ENSG00000284814,ENSG00000129467,ENSG00000163485…	A2M,A4GALT,ACAN,ACKR3,ACTA2,ACTN1,ACVR1,ADAM12,ADAM19,ADAM23,ADAM33,ADAMTS1,ADAMTS12,ADAMTS14,ADAMTS16,ADAMTS4,ADAMTS6,ADAMTS7,ADAMTS9,ADAMTSL3,ADARB1,ADCY4,ADORA1,AEBP1,AFAP1L1,AGAP2-AS1,AHI1,AK3,AKAP12,AKT3,ALDH1A3,ALDH1L2,AMOTL1,ANGPT1,ANGPT2,ANGPTL2,ANKRD33B,ANTXR1,ANXA6,AOC3,APBA2,APBB1,APLN,APLNR,AQP1,ARHGAP24,ARHGAP31,ARHGAP32,ARHGEF15,ARHGEF17,ARHGEF25,ARID5A,ARL14,ARL4D,ARMC9,ARMCX1,ARMC…
Liu_LM_cluster_GM2	Liver cancer	PMID_32612211_ST7	ENSG00000109576,ENSG00000165029,ENSG00000154262,ENSG00000069431,ENSG00000154175,ENSG00000275176,ENSG00000278540,ENSG00000134575,ENSG00000102575,ENSG00000111058,ENSG00000213763,ENSG00000151651,ENSG00000142303,ENSG00000283802,ENSG00000087116,ENSG00000154736,ENSG00000143382,ENSG00000184060,ENSG00000285070,ENSG00000006831,ENSG00000282608,ENSG00000144843,ENSG00000116771,ENSG00000235588,ENSG00000206428…	AADAT,ABCA1,ABCA6,ABCC9,ABI3BP,ACACA,ACP2,ACP5,ACSS3,ACTBP2,ADAM8,ADAMTS10,ADAMTS2,ADAMTS5,ADAMTSL4,ADAP2,ADIPOR2,ADORA3,ADPRH,ADSSL1,AGMAT,AIF1,AIM1,AKR1B1,ALG1,ALOX15B,ALOX5,ALOX5AP,ALPK2,ALPL,AMPD3,ANGPTL1,ANGPTL4,ANO1,ANPEP,ANXA5,APBB1IP,APCDD1L,APOC1,APOE,APOL4,AQP9,ARHGAP10,ARHGAP22,ARHGAP25,ARHGAP29,ARHGAP4,ARL4C,ARNTL,ARPC1B,ARRB2,ARRDC4,ARSDP1,ASPN,ATF5,ATP10A,ATP2C2,ATP6V0D2,ATP6V1B2,AT…
Liu_LM_cluster_GM3	Liver cancer	PMID_32612211_ST7	ENSG00000141338,ENSG00000108798,ENSG00000288169,ENSG00000072818,ENSG00000134028,ENSG00000121281,ENSG00000135439,ENSG00000230006,ENSG00000065413,ENSG00000129354,ENSG00000138613,ENSG00000243811,ENSG00000239713,ENSG00000128284,ENSG00000075884,ENSG00000186517,ENSG00000123329,ENSG00000111348,ENSG00000129675,ENSG00000113273,ENSG00000104043,ENSG00000235831,ENSG00000110934,ENSG00000272779,ENSG00000185905…	ABCA8,ABI3,ACAP1,ADAMDEC1,ADCY7,AGAP2,AMICA1,ANKRD36BP2,ANKRD44,AP1M2,APH1B,APOBEC3D,APOBEC3G,APOL3,ARHGAP15,ARHGAP30,ARHGAP9,ARHGDIB,ARHGEF6,ARSB,ATP8B4,BHLHE40-AS1,BIN2,BMS1P20,C16orf54,CARD8,CCDC69,CCL19,CCL22,CCL5,CCR2,CCR4,CCR5,CCR7,CD180,CD1C,CD2,CD209,CD22,CD247,CD27,CD28,CD38,CD3D,CD3E,CD3G,CD48,CD52,CD6,CD69,CD7,CD79A,CD79B,CD8A,CD8B,CD96,CDC34,CFP,CHST2,CIITA,CLEC10A,CLEC2D,CLIC2,COL4A4…
Liu_LM_cluster_GM4	Liver cancer	PMID_32612211_ST7	ENSG00000100342,ENSG00000128335,ENSG00000221963,ENSG00000273686,ENSG00000166710,ENSG00000168062,ENSG00000023445,ENSG00000026950,ENSG00000111801,ENSG00000131142,ENSG00000120217,ENSG00000134326,ENSG00000109861,ENSG00000169245,ENSG00000169248,ENSG00000107201,ENSG00000137628,ENSG00000133106,ENSG00000117228,ENSG00000138642,ENSG00000227715,ENSG00000206505,ENSG00000223980,ENSG00000229215,ENSG00000224320…	APOL1,APOL2,APOL6,B2M,BATF2,BIRC3,BTN3A1,BTN3A3,CCL25,CD274,CMPK2,CTSC,CXCL10,CXCL11,DDX58,DDX60,EPSTI1,GBP1,HERC6,HLA-A,HLA-B,HLA-C,HLA-E,HLA-F,IDO1,IFI16,IFI27,IFI44,IFI44L,IFI6,IFIH1,IFIT1,IFIT2,IFIT3,IRF1,ISG15,LAP3,LOC643733,MX1,MX2,MYH7B,OAS2,OAS3,OASL,OR2I1P,PARP14,PARP9,PSMB8-AS1,RAP2B,RARRES3,RSAD2,SAMD9L,SPTBN2,STAT1,TIMP4,TNFAIP8,TRIM22,UBD,UBE2L6,USP18,USP30-AS1,WARS,XAF1
Liu_LM_cluster_GM5	Liver cancer	PMID_32612211_ST7	ENSG00000140379,ENSG00000277796,ENSG00000277768,ENSG00000277336,ENSG00000276085,ENSG00000186407,ENSG00000166523,ENSG00000119535,ENSG00000169429,ENSG00000163464,ENSG00000180871,ENSG00000162747,ENSG00000171049,ENSG00000123689,ENSG00000182782,ENSG00000255398,ENSG00000136689,ENSG00000157551,ENSG00000103313,ENSG00000099985,ENSG00000184588,ENSG00000163421,ENSG00000172023,ENSG00000163221,ENSG00000143546…	BCL2A1,CCL3L1,CD300E,CLEC4E,CSF3R,CXCL8,CXCR1,CXCR2,FCGR3B,FPR2,G0S2,GPR97,HCAR2,HCAR3,IL1RN,KCNJ15,LOC731424,MEFV,OSM,PDE4B,PROK2,REG1B,S100A12,S100A8,S100A9,SOCS3,SOD2,TNFAIP6
Liu_LM_cluster_GM6	Liver cancer	PMID_32612211_ST7	ENSG00000213088,ENSG00000163017,ENSG00000139567,ENSG00000145362,ENSG00000189058,ENSG00000088756,ENSG00000278693,ENSG00000100628,ENSG00000168398,ENSG00000112175,ENSG00000105974,ENSG00000172156,ENSG00000138135,ENSG00000128656,ENSG00000101938,ENSG00000080644,ENSG00000166250,ENSG00000111799,ENSG00000114270,ENSG00000143387,ENSG00000145824,ENSG00000175084,ENSG00000211448,ENSG00000114654,ENSG00000049540…	ACKR1,ACTG2,ACVRL1,ANK2,APOD,ARHGAP28,ASB2,BDKRB2,BMP5,CAV1,CCL11,CH25H,CHN1,CHRDL1,CHRNA3,CLMP,COL12A1,COL7A1,CTSK,CXCL14,DES,DIO2,EFCC1,ELN,EMID1,EPYC,F2RL2,FADS1,FAM65C,FAT4,FBLN1,FBN2,FENDRR,FGF7,FGFR1,FHL5,FILIP1L,FOXF1,FOXF2,GLT8D2,GNAO1,IGDCC4,IL11,IL13RA2,IL24,ITIH5,KIAA1644,LHX6,LRRC15,LRRN4CL,LSAMP,MAB21L2,MFAP5,MMP2,NCAM1,NEGR1,NKX2-3,NSG1,P2RY14,PCDH18,PDPN,PDZD2,PKIG,PTGFR,RAMP3,SAMD…
Liu_LM_cluster_GM7	Liver cancer	PMID_32612211_ST7	ENSG00000112304,ENSG00000188460,ENSG00000277364,ENSG00000233859,ENSG00000226121,ENSG00000231991,ENSG00000226284,ENSG00000256745,ENSG00000203865,ENSG00000183336,ENSG00000184100,ENSG00000106245,ENSG00000198406,ENSG00000141428,ENSG00000231245,ENSG00000198937,ENSG00000112237,ENSG00000226015,ENSG00000122674,ENSG00000146574,ENSG00000176386,ENSG00000238072,ENSG00000237350,ENSG00000275346,ENSG00000215006…	ACOT13,ACTBP11,ADH5P4,AHCTF1P1,AK2P1,ANXA2P2,ARPC3P1,ARPC3P3,ATP1A1-AS1,ATP5C1,ATP5HP4,bA395L14.12,BOLA2,BRD7P2,BUD31,BZW1P2,C11orf73,C18orf21,C1DP1,CCDC167,CCNC,CCT8P1,CCZ1,CCZ1B,CDC26,CDC26P1,CDC42P6,CHCHD2P2,CHCHD6,CHMP3,CLIC1,COMMD3,COX2,COX20P1,COX6A1P2,CSNK2A3,CYCSP55,CYTB,DGKZP1,DHFRP1,DNAJC19P9,DNAJC8,DYNC1I2P1,DYNC2LI1,DYNLT1,EEF1A1P13,EEF1A1P5,EEF1A1P6,EEF1A1P8,EEF1B2P3,EIF1AXP1,EIF2S2P…
Liu_LM_cluster_GM8	Liver cancer	PMID_32612211_ST7	ENSG00000089053,ENSG00000196510,ENSG00000273780,ENSG00000275832,ENSG00000129315,ENSG00000173588,ENSG00000123989,ENSG00000142694,ENSG00000141012,ENSG00000103145,ENSG00000152795,ENSG00000143493,ENSG00000082781,ENSG00000139620,ENSG00000133619,ENSG00000138095,ENSG00000175324,ENSG00000089022,ENSG00000184752,ENSG00000120798,ENSG00000111581,ENSG00000225553,ENSG00000239756,ENSG00000112511,ENSG00000170633…	ANAPC5,ANAPC7,ARHGAP23,CCNT1,CEP83,CHPF,EVA1B,FAM65A,GALNS,HCFC1R1,HNRNPDL,INTS7,ITGB5,KANSL2,KRBA1,LRPPRC,LSM1,MAPKAPK5,NDUFA12,NR2C1,NUP107,PHF1,RNF34,SLC39A13,SLC9A3R2,SNRPF,SRRM3,TRNA,TSFM,UBE2N,UBTD1,USP3,VEGFB,ZNF664
Liu_LM_cluster_GM9	Liver cancer	PMID_32612211_ST7	ENSG00000169083,ENSG00000112182,ENSG00000153162,ENSG00000178789,ENSG00000138435,ENSG00000160161,ENSG00000103647,ENSG00000113578,ENSG00000187730,ENSG00000285222,ENSG00000111846,ENSG00000112964,ENSG00000135547,ENSG00000177272,ENSG00000170382,ENSG00000185386,ENSG00000131401,ENSG00000171608,ENSG00000186479,ENSG00000164197,ENSG00000117090,ENSG00000100321,ENSG00000180543,ENSG00000071246	AR,BACH2,BMP6,C10orf128,CD300LB,CHRNA1,CILP2,CORO2B,FGF1,GABRD,GCNT2,GHR,GPR133,HEY2,KCNA3,LRRN2,MAPK11,NAPSB,PALM2,PIK3CD,RGS7BP,RNF180,SLAMF1,SYNGR1,TSPYL5,VASH1
Liu_LM_cluster_GM10	Liver cancer	PMID_32612211_ST7	ENSG00000129691,ENSG00000104221,ENSG00000067048,ENSG00000198692,ENSG00000236706,ENSG00000223352,ENSG00000226354,ENSG00000227366,ENSG00000233239,ENSG00000229428,ENSG00000228078,ENSG00000120068,ENSG00000012817,ENSG00000165246,ENSG00000106536,ENSG00000233854,ENSG00000099725,ENSG00000129824,ENSG00000169469,ENSG00000114374,ENSG00000183878,ENSG00000229807,ENSG00000067646	ASH2L,BRF2,DDX3Y,EIF1AY,HIST1H2AC,HLA-U,HOXB8,KDM5D,LOC389834,NLGN4Y,POU6F2,POU6F2-AS2,PRKY,PROSC,RPS4Y1,SPRR1B,TRNC,TRNY,TTTY15,USP9Y,UTY,XIST,ZFY
Liu_LM_cluster_GM11	Liver cancer	PMID_32612211_ST7	ENSG00000284980,ENSG00000155189,ENSG00000147439,ENSG00000158941,ENSG00000147419,ENSG00000184661,ENSG00000147457,ENSG00000198791,ENSG00000104671,ENSG00000134014,ENSG00000197217,ENSG00000104626,ENSG00000171320,ENSG00000147364,ENSG00000284967,ENSG00000079459,ENSG00000172728,ENSG00000104687,ENSG00000197265,ENSG00000104613,ENSG00000104299,ENSG00000197892,ENSG00000104660,ENSG00000154359,ENSG00000285360…	AGPAT5,BIN3,CCAR2,CCDC25,CDCA2,CHMP7,CNOT7,DCTN6,ELP3,ENTPD4,ERI1,ESCO2,FBXO25,FDFT1,FUT10,GSR,GTF2E2,INTS10,INTS9,KIF13B,LEPROTL1,LONRF1,MCPH1,MTUS1,NEIL2,PBK,PCM1,POLR3D,PPP2CB,PPP2R2A,R3HCC1,RPL23AP53,SH2D4A,TNFRSF10A,TNFRSF10B,TNKS,TRIM35,TTI2,VPS37A,XPO7
Liu_LM_cluster_GM12	Liver cancer	PMID_32612211_ST7	ENSG00000177465,ENSG00000151687,ENSG00000180071,ENSG00000135299,ENSG00000178301,ENSG00000165626,ENSG00000112276,ENSG00000118292,ENSG00000128346,ENSG00000088543,ENSG00000155621,ENSG00000182985,ENSG00000152495,ENSG00000112186,ENSG00000159231,ENSG00000158473,ENSG00000113361,ENSG00000100490,ENSG00000006837,ENSG00000188312,ENSG00000175264,ENSG00000150048,ENSG00000168405,ENSG00000214290,ENSG00000121552…	ACOT4,ANKAR,ANKRD18A,ANKRD6,AQP11,BEND7,BVES,C1orf54,C22orf23,C3orf18,C9orf85,CADM1,CAMK4,CAP2,CBR3,CD1D,CDH6,CDKL1,CDKL3,CENPP,CHST1,CLEC1A,CMAHP,COLCA2,CSTA,CTAGE8,CYP2U1,DTX1,EID2,ETV7,FAM221A,FGF11,FHAD1,FICD,FOLH1,FUT3,FUT6,GFOD1,GNRHR2,IDI2,IL15RA,KCNK1,KIAA1024,KIAA1107,KIAA1614,LCA5,LIMCH1,LINC01011,LINC01137,LOC100128361,LOC100129046,LOC100506730,LOC100507373,LOC101927027,LOC101928433,LO…
Liu_LM_cluster_GM13	Liver cancer	PMID_32612211_ST7	ENSG00000189007,ENSG00000175455,ENSG00000238105,ENSG00000284564,ENSG00000284368,ENSG00000169246,ENSG00000100941,ENSG00000255717,ENSG00000155657,ENSG00000237298	ADAT2,CCDC14,GOLGA2P5,LOC728877,MIR3064,MIR5047,NPIPB3,PNN,SNHG1,SNORD47,TTN,TTN-AS1
Liu_LM_cluster_GM14	Liver cancer	PMID_32612211_ST7	ENSG00000214199,ENSG00000249855,ENSG00000249264,ENSG00000234882,ENSG00000248180,ENSG00000253506,ENSG00000226243,ENSG00000237077,ENSG00000228071,ENSG00000214535,ENSG00000234093,ENSG00000241511,ENSG00000217027,ENSG00000234782	EEF1A1P12,EEF1A1P19,EEF1A1P9,EIF3EP1,FLJ44635,GAPDHP60,NACA2,RPL37AP1,RPL38P2,RPL7P47,RPS15AP1,RPS15AP11,RPS15AP24,RPS6P13,TPT1P4,TPT1P9
Liu_LM_cluster_GM15	Liver cancer	PMID_32612211_ST7	ENSG00000166170,ENSG00000170779,ENSG00000100526,ENSG00000134001,ENSG00000100632,ENSG00000100442,ENSG00000087299,ENSG00000165501,ENSG00000168175,ENSG00000075413,ENSG00000129534,ENSG00000100714,ENSG00000100479,ENSG00000225131,ENSG00000092201,ENSG00000198554,ENSG00000140153,ENSG00000119725	BAG5,C14orf166,CDCA4,CDKN3,EIF2S1,ERH,FKBP3,L2HGDH,LRR1,MAPK1IP1L,MARK3,MIS18BP1,MTHFD1,POLE2,PSME2P2,SMEK1,SUPT16H,WDHD1,WDR20,ZNF410
Liu_LM_cluster_GM16	Liver cancer	PMID_32612211_ST7	ENSG00000160179,ENSG00000011426,ENSG00000275568,ENSG00000198826,ENSG00000137135,ENSG00000288210,ENSG00000105011,ENSG00000066279,ENSG00000156802,ENSG00000176208,ENSG00000127423,ENSG00000087586,ENSG00000178999,ENSG00000142920,ENSG00000138376,ENSG00000089685,ENSG00000197299,ENSG00000012048,ENSG00000139618,ENSG00000136492,ENSG00000169679,ENSG00000156970,ENSG00000000460,ENSG00000205208,ENSG00000183401…	ABCG1,ANLN,ARHGAP11A,ARHGEF39,ASF1B,ASPM,ATAD2,ATAD5,AUNIP,AURKA,AURKB,AZIN2,BARD1,BIRC5,BLM,BRCA1,BRCA2,BRIP1,BUB1,BUB1B,C1orf112,C4orf46,CASC5,CCDC159,CCDC77,CCNA2,CCNB1,CCNB2,CCNE1,CCNE2,CCNF,CCT2,CDC20,CDC25A,CDC25C,CDC45,CDC6,CDC7,CDCA3,CDCA5,CDCA8,CDK1,CDK2,CDT1,CENPA,CENPE,CENPF,CENPH,CENPI,CENPK,CENPL,CENPM,CENPN,CENPO,CENPU,CEP152,CEP55,CEP78,CHAF1A,CHAF1B,CHEK1,CHEK2,CHRNA5,CKAP2L,CKS1B…
Liu_LM_cluster_GM17	Liver cancer	PMID_32612211_ST7	ENSG00000121410,ENSG00000114771,ENSG00000005471,ENSG00000183747,ENSG00000187758,ENSG00000196616,ENSG00000198099,ENSG00000079557,ENSG00000187546,ENSG00000144891,ENSG00000172482,ENSG00000145192,ENSG00000187134,ENSG00000198610,ENSG00000163631,ENSG00000136872,ENSG00000106927,ENSG00000132855,ENSG00000109511,ENSG00000138356,ENSG00000132703,ENSG00000118137,ENSG00000158874,ENSG00000110243,ENSG00000084674…	A1BG,AADAC,ABCB4,ACSM2A,ADH1A,ADH1B,ADH4,AFM,AGMO,AGTR1,AGXT,AHSG,AKR1C1,AKR1C4,ALB,ALDOB,AMBP,ANGPTL3,ANXA10,AOX1,APCS,APOA1,APOA2,APOA5,APOB,APOC3,APOH,APOM,ARG1,ASGR1,ASGR2,BAAT,BCHE,BHMT,BHMT2,C3P1,C4BPA,C5,C6,C8A,C8B,C8G,C9,CDO1,CFHR1,CFHR2,CFHR3,CFHR5,CHL1,CLDN10,CLU,COLEC10,COLEC11,CP,CPB2,CPN2,CPS1,CREB3L3,CRHBP,CRP,CSF3,CXCL1,CXCL2,CXCL3,CXCL5,CYP1A2,CYP2C8,CYP2C9,CYP2D6,CYP2E1,CYP3A4,CY…
Liu_LM_cluster_GM18	Liver cancer	PMID_32612211_ST7	ENSG00000125843,ENSG00000101220,ENSG00000101224,ENSG00000125817,ENSG00000088766,ENSG00000101266,ENSG00000198171,ENSG00000215251,ENSG00000088832,ENSG00000101365,ENSG00000125877,ENSG00000088888,ENSG00000125885,ENSG00000125901,ENSG00000101361,ENSG00000088833,ENSG00000125779,ENSG00000132646,ENSG00000125818,ENSG00000132670,ENSG00000101276,ENSG00000125835,ENSG00000271303,ENSG00000125834,ENSG00000125875…	AP5S1,C20orf27,CDC25B,CENPB,CRLS1,CSNK2A1,DDRGK1,FASTKD5,FKBP1A,IDH3B,ITPA,MAVS,MCM8,MRPS26,NOP56,NSFL1C,PANK2,PCNA,PSMF1,PTPRA,SLC52A3,SNRPB,SRXN1,STK35,TBC1D20,TMEM230,TRMT6,UBOX5,VPS16,ZCCHC3,ZNF343
Liu_LM_cluster_GM19	Liver cancer	PMID_32612211_ST7	ENSG00000283018,ENSG00000128626,ENSG00000114698,ENSG00000099341,ENSG00000063177,ENSG00000142534	HIST1H2BC,MRPS12,PLSCR4,PSMD8,RPL18,RPS11
Liu_LM_cluster_GM20	Liver cancer	PMID_32612211_ST7	ENSG00000155008,ENSG00000271225,ENSG00000288368,ENSG00000171155,ENSG00000147400,ENSG00000158290,ENSG00000123575,ENSG00000147099,ENSG00000029993,ENSG00000102241,ENSG00000001497,ENSG00000288295,ENSG00000232119,ENSG00000169446,ENSG00000186416,ENSG00000147383,ENSG00000101888,ENSG00000120509,ENSG00000101843,ENSG00000101972,ENSG00000187325,ENSG00000077721,ENSG00000160131,ENSG00000101966,ENSG00000181704…	APOOL,BNIP3P4,C1GALT1C1,CETN2,CUL4B,CXorf56,FAM199X,HDAC8,HMGB3,HTATSF1,LAS1L,LOC101928413,LOC730076,MCTS1,MMGT1,NKRF,NSDHL,NXT2,PDZD11,PSMD10,STAG2,TAF9B,UBE2A,VMA21,XIAP,YIPF6,ZBTB33,ZNF75D
Liu_LM_cluster_GM21	Liver cancer	PMID_32612211_ST7	ENSG00000213563,ENSG00000187954,ENSG00000284774,ENSG00000185122,ENSG00000179632,ENSG00000274081,ENSG00000179950,ENSG00000274287,ENSG00000180900,ENSG00000179526,ENSG00000274352,ENSG00000181135	C8orf82,CYHR1,HSF1,MAF1,PUF60,SCRIB,SHARPIN,ZNF707
Liu_LM_cluster_GM22	Liver cancer	PMID_32612211_ST7	ENSG00000131043,ENSG00000171456,ENSG00000101421,ENSG00000196730,ENSG00000124228,ENSG00000101452,ENSG00000128610,ENSG00000230316,ENSG00000126010,ENSG00000101294,ENSG00000120093,ENSG00000108511,ENSG00000101350,ENSG00000182798,ENSG00000124217,ENSG00000088356,ENSG00000025293,ENSG00000126003,ENSG00000101346,ENSG00000101161,ENSG00000281861,ENSG00000066230,ENSG00000124214,ENSG00000100991,ENSG00000101407…	AAR2,ASXL1,CHMP4B,DAPK1,DDX27,DHX35,FEZF1,FEZF1-AS1,GRPR,HM13,HOXB3,HOXB6,KIF3B,MAGEB17,MOCS3,PDRG1,PHF20,PLAGL2,POFUT1,PP7080,PRPF6,SLC9A3,STAU1,TRPC4AP,TTI1,YTHDF1,ZSWIM1
Liu_LM_cluster_GM23	Liver cancer	PMID_32612211_ST7	ENSG00000188542,ENSG00000204923,ENSG00000270362,ENSG00000225434,ENSG00000182405,ENSG00000179988	DUSP28,FBXO48,HMGN3-AS1,LINC01504,LOC100133182,LOC101927999,LOC728323,PGBD4,PSTK
Liu_LM_cluster_GM24	Liver cancer	PMID_32612211_ST7	ENSG00000243766,ENSG00000254369,ENSG00000253293,ENSG00000253187,ENSG00000005073,ENSG00000240990,ENSG00000106031,ENSG00000105996,ENSG00000105997,ENSG00000106004,ENSG00000122592,ENSG00000078399	HOTTIP,HOXA-AS3,HOXA10,HOXA10-AS,HOXA11,HOXA11-AS,HOXA13,HOXA2,HOXA3,HOXA5,HOXA7,HOXA9
Liu_LM_cluster_GM25	Liver cancer	PMID_32612211_ST7	ENSG00000164695,ENSG00000164941,ENSG00000172172,ENSG00000156469,ENSG00000155100,ENSG00000156787,ENSG00000147601,ENSG00000137574	CHMP4C,INTS8,MRPL13,MTERF3,OTUD6B,TBC1D31,TERF1,TGS1
Liu_LM_cluster_GM26	Liver cancer	PMID_32612211_ST7	ENSG00000120697,ENSG00000130177,ENSG00000136108,ENSG00000136152,ENSG00000133103,ENSG00000139842,ENSG00000133114,ENSG00000188342,ENSG00000153487,ENSG00000102786,ENSG00000102753,ENSG00000136146,ENSG00000102738,ENSG00000120662,ENSG00000172766,ENSG00000102471,ENSG00000083642,ENSG00000150459,ENSG00000136169,ENSG00000102572,ENSG00000136143,ENSG00000102710,ENSG00000083544,ENSG00000088451,ENSG00000125304…	ALG5,CDC16,CKAP2,COG3,COG6,CUL4A,GPALPP1,GTF2F2,ING1,INTS6,KPNA3,MED4,MRPS31,MTRF1,NAA16,NDFIP2,PDS5B,SAP18,SETDB2,STK24,SUCLA2,SUPT20H,TDRD3,TGDS,TM9SF2,TPP2,TUBGCP3,UBAC2,VPS36,ZC3H13
Yaeger_PR_LS_LM	primary left-side colorectal tumor with mets only in Liver	PMID_29316426	ENSG00000184675,ENSG00000134982,ENSG00000169083,ENSG00000117713,ENSG00000157764,ENSG00000145242,ENSG00000065361,ENSG00000109670,ENSG00000037280,ENSG00000183454,ENSG00000133703,ENSG00000213281,ENSG00000121879,ENSG00000105426,ENSG00000196090,ENSG00000141646,ENSG00000148737,ENSG00000141510,ENSG00000140836	TP53,APC,KRAS,PIK3CA,FBXW7,SMAD4,TCF7L2,BRAF,NRAS,PTPRT,ARID1A,EPHA5,ZFHX3,ERBB3,GRIN2A,PTPRS,FLT4,MLL2,AMER1,AR
Yaeger_PR_LS_MIXED	primary left-side colorectal tumor with mets in dif sites (including liver)	PMID_29316426	ENSG00000134982,ENSG00000117713,ENSG00000149311,ENSG00000157764,ENSG00000083857,ENSG00000109670,ENSG00000133703,ENSG00000148400,ENSG00000074181,ENSG00000121879,ENSG00000177084,ENSG00000284792,ENSG00000171862,ENSG00000105426,ENSG00000108375,ENSG00000141646,ENSG00000141510,ENSG00000140836	APC,KRAS,TP53,PIK3CA,MLL2,FBXW7,ARID1A,BRAF,FAT1,RNF43,PTPRS,ATM,MLL,NOTCH1,ZFHX3,NOTCH3,POLE,PTEN,SMAD4,SMARCHA4
Yaeger_PR_LS_NONLM	primary left-side colorectal tumor with mets in non Liver sites	PMID_29316426	ENSG00000134982,ENSG00000117713,ENSG00000149311,ENSG00000141736,ENSG00000083857,ENSG00000109670,ENSG00000133703,ENSG00000148400,ENSG00000074181,ENSG00000121879,ENSG00000185920,ENSG00000284792,ENSG00000171862,ENSG00000105426,ENSG00000108375,ENSG00000141646,ENSG00000148737,ENSG00000141510	APC,TP53,KRAS,FBXW7,PIK3CA,ARID1A,MLL2,PTPRS,ERBB2,ATM,MLL3,PTCH1,RNF43,TCF7L2,FAT1,NOTCH3,SMAD4,SMARCHA4,NOTCH1,PTEN
Yaeger_PR_RS_LM	primary right-side colorectal tumor with mets only in Liver	PMID_29316426	ENSG00000134982,ENSG00000117713,ENSG00000149311,ENSG00000157764,ENSG00000083857,ENSG00000109670,ENSG00000133703,ENSG00000148400,ENSG00000074181,ENSG00000121879,ENSG00000177084,ENSG00000284792,ENSG00000171862,ENSG00000105426,ENSG00000108375,ENSG00000120693,ENSG00000141510,ENSG00000140836	APC,KRAS,TP53,PIK3CA,MLL2,FBXW7,ARID1A,BRAF,FAT1,RNF43,PTPRS,ATM,MLL,NOTCH1,ZFHX3,NOTCH3,POLE,PTEN,SMAD9,SMARCHA4
Yaeger_PR_RS_MIXED	primary right-side colorectal tumor with mets in dif sites (including liver)	PMID_29316426	ENSG00000171094,ENSG00000134982,ENSG00000169083,ENSG00000117713,ENSG00000149311,ENSG00000085224,ENSG00000157764,ENSG00000141736,ENSG00000083857,ENSG00000160867,ENSG00000133703,ENSG00000074181,ENSG00000238196,ENSG00000232339,ENSG00000223355,ENSG00000235396,ENSG00000234876,ENSG00000206312,ENSG00000204301,ENSG00000121879,ENSG00000284792,ENSG00000171862,ENSG00000105426,ENSG00000108375,ENSG00000141646…	TP53,APC,KRAS,BRAF,PIK3CA,ARID1A,SMAD4,ALK,MLL2,NOTCH3,PTPRS,ATRX,ERBB2,RNF43,AR,ATM,FAT1,FGFR4,NOTCH4,PTEN
Yaeger_PR_RS_NONLM	primary right-side colorectal tumor with mets in non Liver sites	PMID_29316426	ENSG00000134982,ENSG00000117713,ENSG00000157764,ENSG00000083857,ENSG00000109670,ENSG00000133703,ENSG00000148400,ENSG00000074181,ENSG00000121879,ENSG00000177084,ENSG00000185920,ENSG00000105426,ENSG00000108375,ENSG00000065526,ENSG00000148737,ENSG00000141510,ENSG00000140836	APC,KRAS,TP53,PIK3CA,MLL2,ARID1A,BRAF,RNF43,PTPRS,FAT1,FBXW7,ZFHX3,MLL,NOTCH1,PTCH1,SPEN,TCF7L2,NOTCH3,POLE,MLL3
Yaeger_MET_LS_LM	secondary left-side colorectal tumor = mets only from Liver	PMID_29316426	ENSG00000134982,ENSG00000117713,ENSG00000149311,ENSG00000175054,ENSG00000157764,ENSG00000178568,ENSG00000083857,ENSG00000109670,ENSG00000037280,ENSG00000133703,ENSG00000074181,ENSG00000213281,ENSG00000121879,ENSG00000196090,ENSG00000047936,ENSG00000166949,ENSG00000141646,ENSG00000125398,ENSG00000148737,ENSG00000141510	TP53,APC,KRAS,PIK3CA,SMAD4,TCF7L2,FBXW7,NOTCH3,ATM,BRAF,ERBB4,PTPRT,SMAD3,NRAS,FAT1,ROS1,SOX9,ARID1A,ATR,FLT4
Yaeger_MET_LS_MIXED	secondary left-side colorectal tumor = mets from dif sites (including liver)	PMID_29316426	ENSG00000134982,ENSG00000149311,ENSG00000157764,ENSG00000139618,ENSG00000147883,ENSG00000079432,ENSG00000168036,ENSG00000100393,ENSG00000044524,ENSG00000083857,ENSG00000109670,ENSG00000183454,ENSG00000133703,ENSG00000169032,ENSG00000238196,ENSG00000232339,ENSG00000223355,ENSG00000235396,ENSG00000234876,ENSG00000206312,ENSG00000204301,ENSG00000121879,ENSG00000181555,ENSG00000141646,ENSG00000125398…	TP53,APC,KRAS,PIK3CA,SMAD4,BRAF,CTNNB1,GRIN2A,NOTCH4,CIC,FAT1,FBXW7,MAP2K1,SETD2,SOX9,ATM,BRCA2,CDKN2B,EP300,EPHA3
Yaeger_MET_LS_NONLM	secondary left-side colorectal tumor = mets from non Liver sites	PMID_29316426	ENSG00000184675,ENSG00000134982,ENSG00000169083,ENSG00000117713,ENSG00000049618,ENSG00000149311,ENSG00000157764,ENSG00000139618,ENSG00000198286,ENSG00000083520,ENSG00000044524,ENSG00000178568,ENSG00000109670,ENSG00000133703,ENSG00000095015,ENSG00000198793,ENSG00000121879,ENSG00000141646,ENSG00000148737,ENSG00000141510	TP53,APC,KRAS,PIK3CA,BRAF,FBXW7,SMAD4,TCF7L2,ARID1A,ATM,DIS3,EPHA3,AMER1,AR,ARID1B,BRCA2,CARD11,ERBB4,MAP3K1,MTOR
Yaeger_MET_RS_LM	secondary right-side colorectal tumor = mets only from Liver	PMID_29316426	ENSG00000184675,ENSG00000134982,ENSG00000049618,ENSG00000150347,ENSG00000157764,ENSG00000168036,ENSG00000145242,ENSG00000109670,ENSG00000133703,ENSG00000198793,ENSG00000238196,ENSG00000232339,ENSG00000223355,ENSG00000235396,ENSG00000234876,ENSG00000206312,ENSG00000204301,ENSG00000121879,ENSG00000196090,ENSG00000141646,ENSG00000164736,ENSG00000125398,ENSG00000141510,ENSG00000140836	TP53,APC,KRAS,PIK3CA,BRAF,SMAD4,FBXW7,CTNNB1,ZFHX3,EPHA5,MTOR,NOTCH4,PAK7,PARK2,SOX17,SOX9,AMER1,ARID1B,ARID5B,PTPRT
Yaeger_MET_RS_MIXED	secondary right-side colorectal tumor = mets from dif sites (including liver)	PMID_29316426	ENSG00000171094,ENSG00000134982,ENSG00000189079,ENSG00000157764,ENSG00000145242,ENSG00000139083,ENSG00000068078,ENSG00000183454,ENSG00000135100,ENSG00000185811,ENSG00000133703,ENSG00000134250,ENSG00000121879,ENSG00000171608,ENSG00000282932,ENSG00000153707,ENSG00000175387,ENSG00000141646,ENSG00000164736,ENSG00000141510,ENSG00000131653	TP53,APC,KRAS,PIK3CA,BRAF,ALK,EPHA5,SMAD4,GRIN2A,HNF1A,IKZF1,ARID2,ETV6,FGFR3,NOTCH2,PIK3CD,PTPRD,SOX17,TRAF7,SMAD2
Yaeger_MET_RS_NONLM	secondary right-side colorectal tumor = mets from non Liver sites	PMID_29316426	ENSG00000134982,ENSG00000117713,ENSG00000049618,ENSG00000171456,ENSG00000149311,ENSG00000157764,ENSG00000168036,ENSG00000100393,ENSG00000083857,ENSG00000133703,ENSG00000074181,ENSG00000121879,ENSG00000105426,ENSG00000108375,ENSG00000141646,ENSG00000127616,ENSG00000141510,ENSG00000140836	APC,TP53,KRAS,SMAD4,BRAF,PTPRS,FAT1,NOTCH3,RNF43,ARID1B,CTNNB1,FOT1L,MLL2,ARID1A,ASXL1,ATM,EP300,PIK3CA,SMARCA4,ZFHX3
Bagaev_Angiogenesis	TME	PMID_34019806	ENSG00000154188,ENSG00000091879,ENSG00000179776,ENSG00000163735,ENSG00000169429,ENSG00000180871,ENSG00000102755,ENSG00000128052,ENSG00000145431,ENSG00000119630,ENSG00000120156,ENSG00000112715,ENSG00000173511,ENSG00000150630,ENSG00000110799	ANGPT1,ANGPT2,CDH5,CXCL5,CXCL8,CXCR2,FLT1,KDR,PDGFC,PGF,TEK,VEGFA,VEGFB,VEGFC,VWF
Bagaev_Antitumor_ytokines	TME	PMID_34019806	ENSG00000278567,ENSG00000274221,ENSG00000277632,ENSG00000188379,ENSG00000171855,ENSG00000138684,ENSG00000228978,ENSG00000204490,ENSG00000223952,ENSG00000228849,ENSG00000228321,ENSG00000230108,ENSG00000206439,ENSG00000232810,ENSG00000121858	CCL3,IFNA2,IFNB1,IL21,TNF,TNFSF10
Bagaev_B_cells	TME	PMID_34019806	ENSG00000285369,ENSG00000136573,ENSG00000177455,ENSG00000012124,ENSG00000105369,ENSG00000007312,ENSG00000117322,ENSG00000143297,ENSG00000156738,ENSG00000196092,ENSG00000035720,ENSG00000240505,ENSG00000159958,ENSG00000048462	BLK,CD19,CD22,CD79A,CD79B,CR2,FCRL5,MS4A1,PAX5,STAP1,TNFRSF13B,TNFRSF13C,TNFRSF17
Bagaev_Cancer_associated_fibroblasts	TME	PMID_34019806	ENSG00000107796,ENSG00000174807,ENSG00000060718,ENSG00000108821,ENSG00000164692,ENSG00000130635,ENSG00000142156,ENSG00000142173,ENSG00000163359,ENSG00000107562,ENSG00000078098,ENSG00000077942,ENSG00000138685,ENSG00000115414,ENSG00000123384,ENSG00000139329,ENSG00000197614,ENSG00000087245,ENSG00000149968,ENSG00000134853,ENSG00000113721	ACTA2,CD248,COL11A1,COL1A1,COL1A2,COL5A1,COL6A1,COL6A2,COL6A3,CXCL12,FAP,FBLN1,FGF2,FN1,LRP1,LUM,MFAP5,MMP2,MMP3,PDGFRA,PDGFRB
Bagaev_Checkpoint_molecules	TME	PMID_34019806	ENSG00000186265,ENSG00000120217,ENSG00000163599,ENSG00000135077,ENSG00000089692,ENSG00000276977,ENSG00000188389,ENSG00000197646,ENSG00000181847,ENSG00000107738	BTLA,CD274,CTLA4,HAVCR2,LAG3,PDCD1,PDCD1LG2,TIGIT,VSIR
Bagaev_Co_stimulatory_ligands	TME	PMID_34019806	ENSG00000102245,ENSG00000125726,ENSG00000121594,ENSG00000112149,ENSG00000114013,ENSG00000160223,ENSG00000117586,ENSG00000125657	CD40LG,CD70,CD80,CD83,CD86,ICOSLG,TNFSF4,TNFSF9
Bagaev_Co_stimulatory_receptors	TME	PMID_34019806	ENSG00000139193,ENSG00000178562,ENSG00000101017,ENSG00000163600,ENSG00000186827,ENSG00000049249	CD27,CD28,CD40,ICOS,TNFRSF4,TNFRSF9
Bagaev_Effector_cell_traffic	TME	PMID_34019806	ENSG00000278567,ENSG00000274221,ENSG00000277632,ENSG00000277943,ENSG00000275824,ENSG00000275302,ENSG00000274233,ENSG00000271503,ENSG00000006210,ENSG00000168329,ENSG00000169245,ENSG00000169248,ENSG00000138755,ENSG00000186810	CCL3,CCL4,CCL5,CX3CL1,CX3CR1,CXCL10,CXCL11,CXCL9,CXCR3
Bagaev_Effector_cells	TME	PMID_34019806	ENSG00000153563,ENSG00000172116,ENSG00000163508,ENSG00000117560,ENSG00000115523,ENSG00000145649,ENSG00000100453,ENSG00000113088,ENSG00000111537,ENSG00000180644,ENSG00000073861,ENSG00000115085	CD8A,CD8B,EOMES,FASLG,GNLY,GZMA,GZMB,GZMK,IFNG,PRF1,TBX21,ZAP70
Bagaev_Endothelium	TME	PMID_34019806	ENSG00000179776,ENSG00000176435,ENSG00000106991,ENSG00000102755,ENSG00000128052,ENSG00000138722,ENSG00000173269,ENSG00000164867,ENSG00000162692,ENSG00000110799	CDH5,CLEC14A,ENG,FLT1,KDR,MMRN1,MMRN2,NOS3,VCAM1,VWF
Bagaev_Granulocyte_traffic	TME	PMID_34019806	ENSG00000172156,ENSG00000183625,ENSG00000163739,ENSG00000081041,ENSG00000163735,ENSG00000169429,ENSG00000163464,ENSG00000180871,ENSG00000049130	CCL11,CCR3,CXCL1,CXCL2,CXCL5,CXCL8,CXCR1,CXCR2,KITLG
Bagaev_Immune_Suppression_by_Myeloid_Cells	TME	PMID_34019806	ENSG00000118520,ENSG00000165168,ENSG00000131203,ENSG00000136634,ENSG00000104951,ENSG00000136244,ENSG00000073756	ARG1,CYBB,IDO1,IL10,IL4I1,IL6,PTGS2
Bagaev_M1_signature	TME	PMID_34019806	ENSG00000174600,ENSG00000168811,ENSG00000113302,ENSG00000125538,ENSG00000110944,ENSG00000128604,ENSG00000007171,ENSG00000184557,ENSG00000228978,ENSG00000204490,ENSG00000223952,ENSG00000228849,ENSG00000228321,ENSG00000230108,ENSG00000206439,ENSG00000232810	CMKLR1,IL12A,IL12B,IL1B,IL23A,IRF5,NOS2,SOCS3,TNF
Bagaev_Macrophage_and_DC_traffic	TME	PMID_34019806	ENSG00000108691,ENSG00000108688,ENSG00000108700,ENSG00000121807,ENSG00000184371,ENSG00000182578,ENSG00000143184,ENSG00000173578	CCL2,CCL7,CCL8,CCR2,CSF1,CSF1R,XCL1,XCR1
Bagaev_Matrix	TME	PMID_34019806	ENSG00000060718,ENSG00000108821,ENSG00000164692,ENSG00000168542,ENSG00000187498,ENSG00000130635,ENSG00000049540,ENSG00000115414,ENSG00000053747,ENSG00000196878,ENSG00000058085,ENSG00000283082,ENSG00000205076,ENSG00000168961,ENSG00000041982,ENSG00000109072	COL11A1,COL1A1,COL1A2,COL3A1,COL4A1,COL5A1,ELN,FN1,LAMA3,LAMB3,LAMC2,LGALS7,LGALS9,TNC,VTN
Bagaev_Matrix_remodeling	TME	PMID_34019806	ENSG00000158859,ENSG00000154736,ENSG00000107159,ENSG00000113083,ENSG00000196611,ENSG00000275365,ENSG00000099953,ENSG00000262406,ENSG00000087245,ENSG00000149968,ENSG00000137673,ENSG00000100985,ENSG00000152952	ADAMTS4,ADAMTS5,CA9,LOX,MMP1,MMP11,MMP12,MMP2,MMP3,MMP7,MMP9,PLOD2
Bagaev_MHCI	TME	PMID_34019806	ENSG00000273686,ENSG00000166710,ENSG00000227715,ENSG00000206505,ENSG00000223980,ENSG00000229215,ENSG00000224320,ENSG00000231834,ENSG00000235657,ENSG00000206503,ENSG00000206450,ENSG00000228964,ENSG00000224608,ENSG00000232126,ENSG00000223532,ENSG00000234745,ENSG00000206435,ENSG00000237022,ENSG00000206452,ENSG00000228299,ENSG00000225691,ENSG00000233841,ENSG00000204525,ENSG00000140853,ENSG00000227816…	B2M,HLA-A,HLA-B,HLA-C,NLRC5,TAP1,TAP2,TAPBP
Bagaev_MHCII	TME	PMID_34019806	ENSG00000179583,ENSG00000242361,ENSG00000239463,ENSG00000241394,ENSG00000243189,ENSG00000243215,ENSG00000243719,ENSG00000242685,ENSG00000204257,ENSG00000242092,ENSG00000242386,ENSG00000234154,ENSG00000241296,ENSG00000241674,ENSG00000226264,ENSG00000239329,ENSG00000242574,ENSG00000228163,ENSG00000235844,ENSG00000229685,ENSG00000206291,ENSG00000236177,ENSG00000224103,ENSG00000168384,ENSG00000231389…	CIITA,HLA-DMA,HLA-DMB,HLA-DPA1,HLA-DPB1,HLA-DQA1,HLA-DQB1,HLA-DRA,HLA-DRB1
Bagaev_Myeloid_cells_traffic	TME	PMID_34019806	ENSG00000275528,ENSG00000275718,ENSG00000006606,ENSG00000184371,ENSG00000182578,ENSG00000164400,ENSG00000198223,ENSG00000108342,ENSG00000119535,ENSG00000107562,ENSG00000163735,ENSG00000169429,ENSG00000180871,ENSG00000121966,ENSG00000136244,ENSG00000160712	CCL15,CCL26,CSF1,CSF1R,CSF2,CSF2RA,CSF3,CSF3R,CXCL12,CXCL5,CXCL8,CXCR2,CXCR4,IL6,IL6R
Bagaev_Neutrophil_signature	TME	PMID_34019806	ENSG00000204936,ENSG00000100448,ENSG00000163464,ENSG00000180871,ENSG00000277571,ENSG00000197561,ENSG00000162747,ENSG00000126262,ENSG00000005381,ENSG00000008438,ENSG00000277804,ENSG00000196415	CD177,CTSG,CXCR1,CXCR2,ELANE,FCGR3B,FFAR2,MPO,PGLYRP1,PRTN3
Bagaev_NK_cells	TME	PMID_34019806	ENSG00000117281,ENSG00000150637,ENSG00000122223,ENSG00000163508,ENSG00000137441,ENSG00000115523,ENSG00000100453,ENSG00000100450,ENSG00000111537,ENSG00000276779,ENSG00000278074,ENSG00000273575,ENSG00000275237,ENSG00000275732,ENSG00000276044,ENSG00000277355,ENSG00000278606,ENSG00000275848,ENSG00000274193,ENSG00000274189,ENSG00000274955,ENSG00000277964,ENSG00000274945,ENSG00000275699,ENSG00000278201…	CD160,CD226,CD244,EOMES,FGFBP2,GNLY,GZMB,GZMH,IFNG,KIR2DL4,KLRC2,KLRF1,KLRK1,NCR1,NCR3,NKG7,SH2D1B
Bagaev_Protumor_cytokines	TME	PMID_34019806	ENSG00000136634,ENSG00000127318,ENSG00000136244,ENSG00000276701,ENSG00000240972,ENSG00000105329,ENSG00000092969,ENSG00000119699	IL10,IL22,IL6,MIF,TGFB1,TGFB2,TGFB3
Bagaev_T_cells	TME	PMID_34019806	ENSG00000178562,ENSG00000167286,ENSG00000198851,ENSG00000160654,ENSG00000110448,ENSG00000113263,ENSG00000073861,ENSG00000277734,ENSG00000163519,ENSG00000281981,ENSG00000211751,ENSG00000276849,ENSG00000211772	CD28,CD3D,CD3E,CD3G,CD5,ITK,TBX21,TRAC,TRAT1,TRBC1,TRBC2
Bagaev_Th1_signature	TME	PMID_34019806	ENSG00000102245,ENSG00000111537,ENSG00000081985,ENSG00000109471,ENSG00000138684,ENSG00000138378,ENSG00000073861	CD40LG,IFNG,IL12RB2,IL2,IL21,STAT4,TBX21
Bagaev_Th2_signature	TME	PMID_34019806	ENSG00000183813,ENSG00000136634,ENSG00000169194,ENSG00000113520,ENSG00000113525	CCR4,IL10,IL13,IL4,IL5
Bagaev_Treg	TME	PMID_34019806	ENSG00000179934,ENSG00000163599,ENSG00000049768,ENSG00000030419,ENSG00000123411,ENSG00000136634,ENSG00000186891	CCR8,CTLA4,FOXP3,IKZF2,IKZF4,IL10,TNFRSF18
Bagaev_Treg_and_Th2_traffic	TME	PMID_34019806	ENSG00000108702,ENSG00000102970,ENSG00000102962,ENSG00000151882,ENSG00000184451,ENSG00000183813,ENSG00000179934	CCL1,CCL17,CCL22,CCL28,CCR10,CCR4,CCR8
Bagaev_Tumor_proliferation_rate	TME	PMID_34019806	ENSG00000087586,ENSG00000178999,ENSG00000169679,ENSG00000134057,ENSG00000110092,ENSG00000105173,ENSG00000123374,ENSG00000153140,ENSG00000101412,ENSG00000171320,ENSG00000073111,ENSG00000076003,ENSG00000148773,ENSG00000101057,ENSG00000166851	AURKA,AURKB,BUB1,CCNB1,CCND1,CCNE1,CDK2,CETN3,E2F1,ESCO2,MCM2,MCM6,MKI67,MYBL2,PLK1
Bagaev_Tumor_associated_Macrophages	TME	PMID_34019806	ENSG00000177575,ENSG00000129226,ENSG00000182578,ENSG00000136634,ENSG00000104951,ENSG00000260314,ENSG00000038945,ENSG00000088827	CD163,CD68,CSF1R,IL10,IL4I1,MRC1,MSR1,SIGLEC1
Bagaev_Co_activation_molecules	TME	PMID_34019806	ENSG00000139193,ENSG00000178562,ENSG00000101017,ENSG00000102245,ENSG00000125726,ENSG00000121594,ENSG00000112149,ENSG00000114013,ENSG00000163600,ENSG00000160223,ENSG00000186827,ENSG00000049249,ENSG00000117586,ENSG00000125657	CD28,CD40,TNFRSF4,ICOS,TNFRSF9,CD27,CD80,CD86,CD40LG,CD83,TNFSF4,ICOSLG,TNFSF9,CD70
Bagaev_EMT_signature		PMID_34019806	ENSG00000170558,ENSG00000124216,ENSG00000019549,ENSG00000122691,ENSG00000288335,ENSG00000233608,ENSG00000148516,ENSG00000169554	SNAI1,SNAI2,TWIST1,TWIST2,ZEB1,ZEB2,CDH2
ESTIMATE_stromal_signature	Cancer		ENSG00000154262,ENSG00000163017,ENSG00000148848,ENSG00000154736,ENSG00000235588,ENSG00000206428,ENSG00000234836,ENSG00000235985,ENSG00000237727,ENSG00000204472,ENSG00000131471,ENSG00000077420,ENSG00000088756,ENSG00000106819,ENSG00000104043,ENSG00000182492,ENSG00000010671,ENSG00000173372,ENSG00000173369,ENSG00000171860,ENSG00000163823,ENSG00000170458,ENSG00000177575,ENSG00000091972,ENSG00000174807…	DCN,PAPPA,SFRP4,THBS2,LY86,CXCL14,FOXF1,COL10A1,ACTG2,APBB1IP,SH2D1A,SULF1,MSR1,C3AR1,FAP,PTGIS,ITGBL1,BGN,CXCL12,ECM2,FCGR2A,MS4A4A,WISP1,COL1A2,MS4A6A,EDNRA,VCAM1,GPR124,SCUBE2,AIF1,HEPH,LUM,PTGER3,RUNX1T1,CDH5,PIK3R5,RAMP3,LDB2,COX7A1,EDIL3,DDR2,FCGR2B,LPPR4,COL15A1,AOC3,ITIH3,FMO1,PRKG1,PLXDC1,VSIG4,COL6A3,SGCD,COL3A1,F13A1,OLFML1,IGSF6,COMP,HGF,GIMAP5,ABCA6,ITGAM,MAF,ITM2A,CLEC7A,ASPN,LRRC15…
ESTIMATE_immune_signature	Cancer		ENSG00000151651,ENSG00000121281,ENSG00000132965,ENSG00000136250,ENSG00000075884,ENSG00000111348,ENSG00000129675,ENSG00000140379,ENSG00000110934,ENSG00000137752,ENSG00000198624,ENSG00000274233,ENSG00000271503,ENSG00000126353,ENSG00000116824,ENSG00000198821,ENSG00000139193,ENSG00000167851,ENSG00000241399,ENSG00000104894,ENSG00000167286,ENSG00000117091,ENSG00000169442,ENSG00000143119,ENSG00000110848…	LCP2,LSP1,FYB,PLEK,HCK,IL10RA,LILRB1,NCKAP1L,LAIR1,NCF2,CYBB,PTPRC,IL7R,LAPTM5,CD53,EVI2B,SLA,ITGB2,GIMAP4,MYO1F,HCLS1,MNDA,IL2RG,CD48,AOAH,CCL5,LTB,GMFG,GIMAP6,GZMK,LST1,GPR65,LILRB2,WIPF1,CD37,BIN2,FCER1G,IKZF1,TYROBP,FGL2,FLI1,IRF8,ARHGAP15,SH2B3,TNFRSF1B,DOCK2,CD2,ARHGEF6,CORO1A,LY96,LYZ,ITGAL,TNFAIP3,RNASE6,TGFB1,PSTPIP1,CST7,RGS1,FGR,SELL,MICAL1,TRAF3IP3,ITGA4,MAFB,ARHGDIB,IL4R,RHOH,HLA-DPA…
Nersisyan_TMM_TEL_pathway	TMM		ENSG00000178971,ENSG00000130826,ENSG00000109534,ENSG00000080824,ENSG00000096384,ENSG00000205339,ENSG00000114030,ENSG00000039123,ENSG00000145414,ENSG00000145912,ENSG00000182117,ENSG00000274829,ENSG00000140694,ENSG00000110958,ENSG00000132341,ENSG00000153201,ENSG00000284901,ENSG00000175792,ENSG00000183207,ENSG00000107960,ENSG00000103266,ENSG00000257949,ENSG00000121274,ENSG00000270141,ENSG00000164362…	TENT4B,PTGES3,CST,RANBP2,STUB1,KPNA1,IPO7,hTR degradation,TRAMP,Pontin/Reptin,RUVBL2,RUVBL1,HSP90_max,HSP90AB1,HSP90AA2,HSP90AA1,Nuclear hTR,NOP10,NHP2,NAF1,DKC1–NOP10– NHP2–NAF1,DKC1,TERC,TERT,Telomerase,hTR maturation,PARN,GAR1,TERT-TERC-DCK1 min,ZCCHC7,MTREX,TERT nuclear import,Telomere synthesis,TEL,CTC1,STN1,TEN1,RAN,nuclear_import,HSP90,WRAP53
Nersisyan_TMM_ALT_pathway	TMM		ENSG00000175054,ENSG00000085224,ENSG00000197299,ENSG00000149554,ENSG00000231617,ENSG00000229396,ENSG00000206206,ENSG00000227046,ENSG00000206279,ENSG00000204209,ENSG00000012061,ENSG00000175595,ENSG00000135486,ENSG00000121211,ENSG00000104320,ENSG00000177463,ENSG00000185551,ENSG00000156831,ENSG00000132646,ENSG00000140464,ENSG00000077514,ENSG00000128513,ENSG00000131470,ENSG00000113522,ENSG00000051180…	telomere recruitment to APB,ERCC1/4 min,MRN_min,RPA min,NR2C2,MRN,PML,H3F3A,H3.3 at telomeres,SLX1,ERCC1/4,ERCC1,ERCC4,RPA-bound telomeres,RAD52,RPA1,RPA3,RPA,RPA2,POT replacement by RPA,POT1,ALT,HJ dissolution,HJ resolution,HJ processing,templated synthesis,G4 loops provoke DDR,Hop2-Mnd1,MND1,PSMC3IP,HNRNPA1,ATRX,CHEK1,ATR,PCNA,POLD3,RFC1,BLM,TOP3A,RMI1,RMI2,BTR,clamp loading complex,PCNA clamp,…
Hueber_ANGPLL4_metastasis_inhibitors	Cancer	PMID_36269299	ENSG00000091879,ENSG00000136859,ENSG00000167772,ENSG00000130812,ENSG00000090932,ENSG00000019991,ENSG00000101384,ENSG00000148400,ENSG00000134250,ENSG00000074181,ENSG00000118257,ENSG00000197461,ENSG00000100311,ENSG00000145431,ENSG00000134853,ENSG00000113721,ENSG00000151665,ENSG00000112715	ANGPT2,ANGPTL2,ANGPTL4,ANGPTL6,DLL3,HGF,JAG1,NOTCH1,NOTCH2,NOTCH3,NRP2,PDGFA,PDGFB,PDGFC,PDGFRA,PDGFRB,PIGF,VEGFA
Shaffer_resistance_jackpot_genes	Cancer	PMID_28607484	ENSG00000167601,ENSG00000146648,ENSG00000077782,ENSG00000177606,ENSG00000134013,ENSG00000064300,ENSG00000157168,ENSG00000113721,ENSG00000124813,ENSG00000106366,ENSG00000150630,ENSG00000114251	VEGFC,AXL,JUN,WNT5A,NGFR,SERPINE1,FGFR1,LOXL2,EGFR,NRG1,PDGFRB,RUNX2
Moosavi_LMS-Spot_A	LMS Spots	PMID_34470666	ENSG00000177076,ENSG00000153294,ENSG00000158467,ENSG00000185567,ENSG00000152766,ENSG00000179674,ENSG00000183778,ENSG00000182240,ENSG00000064787,ENSG00000125378,ENSG00000188112,ENSG00000185015,ENSG00000104327,ENSG00000203697,ENSG00000196352,ENSG00000163814,ENSG00000016602,ENSG00000169583,ENSG00000112782,ENSG00000065618,ENSG00000196188,ENSG00000163739,ENSG00000169429,ENSG00000187908,ENSG00000161249…	PPBP,CLCA4,CLCA4,CALB1,DMBT1,NPSR1,REG4,MUC2,CTSE,MUC17,SCEL,MUC17,TCN1,MUC2,MUC17,ST6GALNAC1,NPSR1,CALB1,DSG3,PI3,MSLN,KLK6,PIGR,MMP7,C10orf126,NOS2,FDCSP,KLK7,KRT6B,MUC4,MUC4,GCNT3,RAB27B,RAB27B,MUC17,NMU,KLK10,CLIC5,TFF1,KRT17,DUOXA2,DUOX2,IGF2BP3,CLIC3,NOS2,GDA,PLAC8,SERPINB5,MBOAT2,LEMD1,SLPI,C6orf132,LIPH,C6orf132,MUC1,CD55,ARL14,AHNAK2,AHNAK2,QSOX1,COL17A1,CXCL8,DSC2,MUC1,EGLN3,ADGRF4,BCAS…
Moosavi_LMS-Spot_B	LMS Spots	PMID_34470666	ENSG00000085563,ENSG00000131969,ENSG00000283539,ENSG00000100312,ENSG00000140873,ENSG00000144820,ENSG00000184160,ENSG00000111275,ENSG00000126016,ENSG00000104537,ENSG00000154856,ENSG00000162630,ENSG00000095739,ENSG00000127325,ENSG00000158966,ENSG00000180881,ENSG00000120262,ENSG00000113100,ENSG00000166446,ENSG00000135048,ENSG00000188452,ENSG00000153132,ENSG00000159212,ENSG00000158258,ENSG00000095321…	DEFA5,DEFA6,EPHA7,REG3A,WIF1,GLRA2,REG1B,PCSK1,PEG10,IGFBPL1,REG1A,SLC38A11,TM4SF20,FGF20,PCSK1,SLITRK6,ENPP3,TAC1,HCN1,DRD2,CST1,CST4,IGFBPL1,MME,SBSPON,ERP27,PCDHB8,OSBPL6,HS3ST4,SULT1E1,GALNT13,CYP4X1,KL,ROBO2,WASHC1,ADGRG7,HOXD10,SBSPON,CLGN,PCDHB11,TRPM3,TMEM252,GLDC,FZD10,CERKL,CLSTN2,B3GALT2,DCT,KCTD16,CLSTN2,UGT2A3,CSRNP3,BEST3,ESRRG,NPY4R,FREM2,GPR37,UGT2A3,ABHD12B,MEP1B,GABRA3,GUCA2A,DM…
Moosavi_LMS-Spot_C	LMS Spots	PMID_34470666	ENSG00000106077,ENSG00000136379,ENSG00000281879,ENSG00000175164,ENSG00000120437,ENSG00000130234,ENSG00000197142,ENSG00000136518,ENSG00000205336,ENSG00000116771,ENSG00000173467,ENSG00000106305,ENSG00000059573,ENSG00000153107,ENSG00000284290,ENSG00000175311,ENSG00000011426,ENSG00000138772,ENSG00000129354,ENSG00000106367,ENSG00000111701,ENSG00000109321,ENSG00000112379,ENSG00000275568,ENSG00000198826…	SLC26A3,NXPE4,CEACAM7,OLFM4,NXPE1,RAD51AP1,MUC5B,MUC5B,MEP1A,LRP4,AGR3,LRRC19,ACE2,SMIM31,SAMD5,EREG,CCL20,SMIM31,MUC3A,GRIN2B,SULT1B1,SKA1,SLC9A2,LGR5,KIAA1324,MUC12,GRM8,FHDC1,H4C8,HOXA13,HHLA2,CHRM3,HOXA13,HTR1D,SLC7A11,IL17RB,NOX1,PLCB4,RTKN2,KIAA1324,LRRC66,MGAM2,MGAM2,MGAM2,KRT20,CDC6,SAMD5,NDC80,PROM1,CKAP2L,SPINK1,MYO5B,TRIM31,LRATD1,SLC7A5,C10orf99,APOBEC1,TOX3,DNMT3B,AREG,CKMT1B,AREG,EL…
Moosavi_LMS-Spot_D	LMS Spots	PMID_34470666	ENSG00000281879,ENSG00000175164,ENSG00000133627,ENSG00000106526,ENSG00000189007,ENSG00000101126,ENSG00000130396,ENSG00000172650,ENSG00000123908,ENSG00000158467,ENSG00000023516,ENSG00000120697,ENSG00000242110,ENSG00000134884,ENSG00000288422,ENSG00000213214,ENSG00000284933,ENSG00000050327,ENSG00000185829,ENSG00000234549,ENSG00000231257,ENSG00000206488,ENSG00000229061,ENSG00000223752,ENSG00000235658…	MALRD1,MALRD1,PIWIL1,CEL,CPA6,CEL,DUXAP9,GABRA2,MALRD1,CEL,MALRD1,FGGY,FGGY,MBOAT2,NKD1,FREM1,CEL,LYPD8,PGAP1,TRPM6,MIR421,DPEP1,C3orf85,DUXAP9,CAB39L,CADPS,C3orf85,AMACR,PLAG1,LINC01811,CDHR1,SLC2A12,TDGF1,TBC1D4,PLAG1,FAM118A,OTULINL,CCL24,ZNF117,LNX2,PTPRO,C1QTNF3,DACH1,SUCLA2,HM13,OXGR1,PLEKHA5,STX3,PTCH1,ZNF681,GPCPD1,SUCLA2,ZDHHC21,ZNF117,BCL11A,KCNH8,LY6G6D,OR2A7,ZNF697,PRLR,PTCH1,RBM26,BC…
Moosavi_LMS-Spot_E	LMS Spots	PMID_34470666	ENSG00000154175,ENSG00000093072,ENSG00000042980,ENSG00000134028,ENSG00000065413,ENSG00000135046,ENSG00000077420,ENSG00000075884,ENSG00000111348,ENSG00000129675,ENSG00000104763,ENSG00000147416,ENSG00000060982,ENSG00000140379,ENSG00000123095,ENSG00000110934,ENSG00000010671,ENSG00000143110,ENSG00000159189,ENSG00000171860,ENSG00000197405,ENSG00000153956,ENSG00000064989,ENSG00000091986,ENSG00000115355…	DPT,CCL4,HLA-DRB5,HLA-DQA1,HLA-DQA1,CCL2,SVEP1,CXCL10,SPARCL1,HLA-DRB1,PLN,PLN,JCHAIN,FGF7,COLEC12,VWF,HLA-DRB1,SUCNR1,TLR7,ICAM1,IFI44L,CD180,HLA-DQA1,CD180,ADAMDEC1,TMEM255A,LY86,FRZB,FBLN5,MMP2,GZMK,CD69,CD69,C5AR1,CCDC80,MRC1,MRC1,ABI3BP,GPR174,GPR183,RGS2,FCGR1B,SELL,FCGR1B,COL14A1,CR1,KCNJ5,FGL2,PLEK,ADA2,SLC1A3,CCN1,SLC16A6,CD109,RBMS3,FCGR1B,FCGR1A,CXCL9,SFRP4,HLA-DQB1,IL7R,P2RX7,ITGBL1,O…
Moosavi_LMS-Spot_F	LMS Spots	PMID_34470666	ENSG00000121410,ENSG00000148584,ENSG00000114771,ENSG00000276582,ENSG00000073734,ENSG00000005471,ENSG00000023839,ENSG00000196177,ENSG00000075239,ENSG00000172497,ENSG00000183747,ENSG00000066813,ENSG00000183549,ENSG00000111058,ENSG00000112414,ENSG00000187758,ENSG00000196616,ENSG00000248144,ENSG00000198099,ENSG00000172955,ENSG00000079557,ENSG00000187546,ENSG00000135744,ENSG00000113492,ENSG00000145192…	GSTA2,F9,UGT2B10,CYP2C8,HSD17B13,SLCO1B1,CYP1A2,UGT2B10,SLCO1B1,TAT,PRG4,CYP3A4,AFM,G6PC,ANGPTL3,UGT2B10,SLC2A2,GLYAT,ADH4,SLC38A4,CFHR2,LOC101929773,GSTA1,SULT2A1,CYP2C9,UGT2B7,GYS2,GYS2,SERPINC1,UGT2B4,APOC3,CPB2,MBL2,APOH,AKR1D1,F13B,BAAT,APOB,BAAT,PRG4,ETNPPL,OTC,CPS1,BHMT,CFHR3,KNG1,PON1,AFM,ARG1,SPP2,ADH1A,APOB,CFHR4,SLC10A1,CFHR5,ACOT12,C9,HRG,ACSM2B,ADH1B,HAO1,LPA,C6,ADH1C,APOB,IGFBP1,CYP…
Liu_TLS_TIGER_IMMUNE_SIGNATURE	Immune Response Signature	PMID_32238929	ENSG00000113916,ENSG00000172724,ENSG00000137077,ENSG00000126353,ENSG00000114013,ENSG00000156234,ENSG00000121966,ENSG00000078081,ENSG00000188404	BCL6,CCL19,CCL21,CCR7,CD86,CXCL13,CXCR4,LAMP3,SELL
Jiang_IFNG_TIGER_IMMUNE_SIGNATURE	Immune Response Signature	PMID_30127393	ENSG00000169245,ENSG00000138755,ENSG00000277263,ENSG00000234794,ENSG00000226260,ENSG00000230726,ENSG00000227993,ENSG00000228987,ENSG00000206308,ENSG00000204287,ENSG00000131203,ENSG00000111537,ENSG00000115415	CXCL10,CXCL9,HLA-DRA,IDO1,IFNG,STAT1
Jiang_CD8_TIGER_IMMUNE_SIGNATURE	Immune Response Signature	PMID_30127393	ENSG00000153563,ENSG00000172116	CD8,CD8A,CD8B
Liu_TLS.melanoma_TIGER_IMMUNE_SIGNATURE	Immune Response Signature	PMID_32238929	ENSG00000112486,ENSG00000158473,ENSG00000007312,ENSG00000087237,ENSG00000198692,ENSG00000213658,ENSG00000107317,ENSG00000288369,ENSG00000139194,ENSG00000141293	CCR6,CD1D,CD79B,CETP,EIF1AY,LAT,PTGDS,RBP5,SKAP1
Ayers_T_cell_inflamed_GEP_TIGER_IMMUNE_SIGNATURE	Immune Response Signature	PMID_28650338	ENSG00000274233,ENSG00000271503,ENSG00000139193,ENSG00000120217,ENSG00000103855,ENSG00000153563,ENSG00000174600,ENSG00000138755,ENSG00000172215,ENSG00000225890,ENSG00000236418,ENSG00000232062,ENSG00000228284,ENSG00000206305,ENSG00000196735,ENSG00000228080,ENSG00000229074,ENSG00000236884,ENSG00000206306,ENSG00000206240,ENSG00000196126,ENSG00000206493,ENSG00000225201,ENSG00000236632,ENSG00000230254…	CCL5,CD27,CD274,CD276,CD8A,CMKLR1,CXCL9,CXCR6,HLA-DQA1,HLA-DRB1,HLA-E,IDO1,LAG3,NKG7,PDCD1LG2,PSMB10,STAT1,TIGTT
Mendelaar_Livermets.driver.oncogenes	Liver cancer	PMID_34039979	ENSG00000116128,ENSG00000186174,ENSG00000157764,ENSG00000133703,ENSG00000142235,ENSG00000213281,ENSG00000121879	BCL9,BCL9L,BRAF,KRAS,LMTK3,NRAS,PIK3CA
Mendelaar_Livermets.driver.tsuppressors	Liver cancer	PMID_34039979	ENSG00000184675,ENSG00000134982,ENSG00000117713,ENSG00000149311,ENSG00000273686,ENSG00000166710,ENSG00000163435,ENSG00000284792,ENSG00000171862,ENSG00000108375,ENSG00000166949,ENSG00000141646,ENSG00000125398,ENSG00000148737,ENSG00000177426,ENSG00000141510,ENSG00000152518	AMER1,APC,ARID1A,ATM,,B2M,ELF3,,PTEN,RNF43,SMAD3,SMAD4,SOX9,TCF7L2,TGIF1,TP53,ZFP36L2
Mendelaar_Livermets.amplified.TMS	Liver cancer	PMID_34039979	ENSG00000275544,ENSG00000161267,ENSG00000165556,ENSG00000165617,ENSG00000101076,ENSG00000102554,ENSG00000005302,ENSG00000132356,ENSG00000171522,ENSG00000188559,ENSG00000124496,ENSG00000146530	BDH1,TRERF1,VWDE,CDX2,KLF5,DACT1,RALGAPA2,HNF4A,MSL3,PRKAA1,PTGER4
Mendelaar_Livermets.amplified.oncogenes	Liver cancer	PMID_34039979	ENSG00000246228,ENSG00000110092,ENSG00000118971,ENSG00000141736,ENSG00000083168,ENSG00000141741	KAT6A,CASC8,CCND1,CCND2,ERBB2,MIEN1
Mendelaar_Livermets.deleted.TMS	Liver cancer	PMID_34039979	ENSG00000162373,ENSG00000147889,ENSG00000224854,ENSG00000183765,ENSG00000189283,ENSG00000065559,ENSG00000099810,ENSG00000112530,ENSG00000284792,ENSG00000171862,ENSG00000166949,ENSG00000141646,ENSG00000120896,ENSG00000186153	FHIT,PTEN,WWOX,MAP2K4,SMAD4,BEND5,PACRG,SORBS3,CDKN2A,MTAP,CDKN2A-DT,SMAD3,CHEK2
Mendelaar_Livermets.deleted.oncogenes	Liver cancer	PMID_34039979	ENSG00000099622,ENSG00000267493,ENSG00000168310	IRF2,CIRBP,CIRBP-AS1
Liu_GINS1	Colon cancer	PMID_36345721	ENSG00000130234,ENSG00000145386,ENSG00000166226,ENSG00000131730,ENSG00000077063,ENSG00000116675,ENSG00000107105,ENSG00000124882,ENSG00000179115,ENSG00000280548,ENSG00000105202,ENSG00000150893,ENSG00000125166,ENSG00000135486,ENSG00000138668,ENSG00000153187,ENSG00000136718,ENSG00000285248,ENSG00000196497,ENSG00000280610,ENSG00000163808,ENSG00000236826,ENSG00000224979,ENSG00000172850,ENSG00000231502…	ACE2,CKMT2,CTTNBP2,DNAJC6,ELAVL2,EREG,FREM2,KIF15,MAP7D2,MKI67,MYRIP,NAALADL2,PAH,PCNA,RBL1,RUBCNL,SPC25,TDGF1,UGT2A3,MRPL9,IPO4,SNRPB2,FBL,RAD23B,RPL34,RANBP1,HNRNPD,PGK1,FARSA,IMP4,SLC29A2,TRIM28,PCBP1,HNRNPA1,PHB,MYBBP1A,TYMS,CCNA2,HNRNPU,LSM2,GOT2,MCM2,SRSF2,SUPV3L1,PPRC1,RABEPK,NOP56,CCT2
Liu_GINS2	Colon cancer	PMID_36345721	ENSG00000154175,ENSG00000148848,ENSG00000106819,ENSG00000102409,ENSG00000143110,ENSG00000112936,ENSG00000123500,ENSG00000060718,ENSG00000144810,ENSG00000105664,ENSG00000078098,ENSG00000164694,ENSG00000143341,ENSG00000171476,ENSG00000165757,ENSG00000281216,ENSG00000162849,ENSG00000113083,ENSG00000132031,ENSG00000197614,ENSG00000186310,ENSG00000086991,ENSG00000182667,ENSG00000198523,ENSG00000203805…	ABI3BP,ADAM12,ASPN,BEX4,C1orf162,C7,COL10A1,COL11A1,COL8A1,COMP,FAP,FNDC1,HMCN1,HOPX,JCAD,KIF26B,LOX,MATN3,MFAP5,NAP1L3,NOX4,NTM,PLN,PLPP4,PRKD1,PRRX1,SPOCK1,SPP1,STON1,SYNC,TCEAL7,THBS2,TMEM45A,TNFAIP6,TWIST1,VGLL3,ZFPM2,ZNF521
Liu_GINS3	Colon cancer	PMID_36345721	ENSG00000198610,ENSG00000140379,ENSG00000188373,ENSG00000176029,ENSG00000262874,ENSG00000175544,ENSG00000105519,ENSG00000278006,ENSG00000278167,ENSG00000275385,ENSG00000108700,ENSG00000049089,ENSG00000092758,ENSG00000178773,ENSG00000186204,ENSG00000015413,ENSG00000143590,ENSG00000054179,ENSG00000187266,ENSG00000167880,ENSG00000130720,ENSG00000189433,ENSG00000112164,ENSG00000282972,ENSG00000168243…	AKR1C4,BCL2A1,C10orf99,C11orf16,C19orf84,C9orf16,CABP4,CAPS,CCL18,CCL8,COL9A2,COL9A3,CPNE7,CYP4F12,DPEP1,EFNA3,ENTPD2,EPOR,EVPL,FAM71A,FIBCD1,GJB4,GLP1R,GNG4,GOLGA6L1,GOLGA6L22,GOLGA6L6,GPR153,GRIN2D,HR,HSD11B2,IHH,IL22RA1,KCNS1,KLC3,KRT23,LGR6,LOC102724488,LRRC10B,LY6G6D,LY6G6F,LY6G6F-LY6G6D,MACROD1,MAPK12,MLXIPL,MSLN,MUC5AC,MYL10,NOTUM,NSMF,PPP1R1B,PRAP1,PRB1,PRB2,PRSS33,PRSS8,RAB3IL1,RARA,REG3…
Liu_GINS4	Colon cancer	PMID_36345721	ENSG00000180044,ENSG00000091986,ENSG00000108691,ENSG00000104415,ENSG00000244414,ENSG00000101938,ENSG00000054938,ENSG00000105205,ENSG00000258227,ENSG00000115295,ENSG00000166250,ENSG00000130176,ENSG00000187955,ENSG00000158270,ENSG00000121005,ENSG00000138061,ENSG00000133083,ENSG00000155011,ENSG00000143196,ENSG00000188641,ENSG00000113657,ENSG00000119147,ENSG00000115380,ENSG00000083782,ENSG00000126860…	C3orf80,CCDC80,CCL2,CCN4,CFHR1,CHRDL1,CHRDL2,CLC,CLEC5A,CLIP4,CLMP,CNN1,COL14A1,COLEC12,CRISPLD1,CYP1B1,DCLK1,DKK2,DPT,DPYD,DPYSL3,ECRG4,EFEMP1,EPYC,EVI2A,EVI2B,F13A1,FDCSP,GZMK,HTR2B,ISM1,KCNMA1,LMOD1,LY96,MAB21L2,MGP,MRC1,MS4A14,MYL9,NEXN,OGN,PTGIS,RSPO3,SCN7A,SERPING1,SFRP1,SFRP2,SFRP4,SLIT2,SRPX,SYNM,SYNPO2,TMEM255A,TNFSF13B,TNS1
Liu_GINS5	Colon cancer	PMID_36345721	ENSG00000163995,ENSG00000129048,ENSG00000112414,ENSG00000163568,ENSG00000165695,ENSG00000002726,ENSG00000152056,ENSG00000198881,ENSG00000183734,ENSG00000160862,ENSG00000112208,ENSG00000113303,ENSG00000185905,ENSG00000104327,ENSG00000188820,ENSG00000278567,ENSG00000274221,ENSG00000277632,ENSG00000277796,ENSG00000277768,ENSG00000277336,ENSG00000276085,ENSG00000277796,ENSG00000277768,ENSG00000277336…	ABLIM2,ACKR4,ADGRG6,AIM2,AK8,AOC1,AP1S3,ASB12,ASCL2,AZGP1,BAG2,BTNL8,C16orf54,CALB1,CALHM6,CCL3,CCL3L1,CCL3L3,CD274,CRTAM,CXCL5,CXCL9,FCGR3A,FCGR3B,FOXD1,GBP4,GBP5,GNLY,GZMA,HCAR2,HCAR3,HOXC6,IDO1,IFI44,IGF2BP3,IGSF6,KLRC1,KLRC2,LOC388813,MNDA,NCF2,PLAAT4,RAB27B,SAMD9L,SAMSN1,SDR16C5,SEMG1,SLCO1B3,TFAP2A,TFEC,TLR1,TLR8,TNFSF9,ZIC2
Liu_GINS6	Colon cancer	PMID_36345721	ENSG00000196616,ENSG00000144891,ENSG00000108839,ENSG00000103375,ENSG00000164122,ENSG00000114200,ENSG00000156284,ENSG00000113805,ENSG00000116133,ENSG00000170323,ENSG00000115263,ENSG00000278608,ENSG00000165072,ENSG00000106511,ENSG00000138722,ENSG00000071203,ENSG00000120729,ENSG00000116711,ENSG00000159337,ENSG00000184381,ENSG00000123560,ENSG00000166292	ADH1B,AGTR1,ALOX12,AQP8,ASB5,BCHE,CLDN8,CNTN3,DHCR24,FABP4,GCG,MAMDC2,MEOX2,MMRN1,MS4A12,MYOT,PLA2G4D,PLA2G4A,PLA2G6,PLP1,TMEM100
DelRio_Folfiri_sensitivity_of_CRC_response_UP	CRC	PMID_17327601	ENSG00000136859,ENSG00000152430,ENSG00000169676,ENSG00000125746,ENSG00000185010,ENSG00000116977,ENSG00000183668,ENSG00000135919,ENSG00000169740,ENSG00000018869	LGALS8,SERPINE2,ANGPTL2,ATP5O,EML2,F8,U2AF1L2,DRD5,GOLGIN-67,ZNF32,PSG9,BOLL,ZNF582
Trumpi_LM.with.chemo_UP	LiverMets	PMID: 28692036	ENSG00000266967,ENSG00000173210,ENSG00000131966,ENSG00000168594,ENSG00000129055,ENSG00000165527,ENSG00000141480,ENSG00000113732,ENSG00000137875,ENSG00000099385,ENSG00000196072,ENSG00000141428,ENSG00000177576,ENSG00000118292,ENSG00000159189,ENSG00000157445,ENSG00000283777,ENSG00000127022,ENSG00000137500,ENSG00000107443,ENSG00000221869,ENSG00000091317,ENSG00000169714,ENSG00000115520,ENSG00000172725…	THAP1,SEC22A,NDUFA13,SAR1A,PLCD3,DHX29,CASC4,MAS1,BCL2L10,COQ10B,CMTM6,MYL6,ENY2,RP11-884K10,5,CANX,BLOC1S2,KBTBD8,TRMT112,HPS6,MYADM,FCER1G,TNFAIP8,EHD4,MRPS16,TRAM1,MED31,SIRT1,C1QC,RBP2,TIGD5,DPH3,PLEKHO2,AC174470,1,POP4,TMED3,DCBLD2,C18orf32,FEM1B,ATP6V0E1,ABLIM3,MAML1,C3orf58,TYROBP,PEF1,ISLR,TLR5,C8orf83,SSPN,ZNF432,CACNA2D3,UBE2D2,ORMDL2,LMOD1,SNX11,SCYL3,PHF23,ICOSLG,OSGIN2,TCEB1,C18orf21…
Trumpi_LM.with.chemo_DN	LiverMets	PMID: 28692036	ENSG00000122729,ENSG00000138071,ENSG00000284980,ENSG00000155189,ENSG00000116337,ENSG00000134884,ENSG00000139352,ENSG00000162174,ENSG00000181652,ENSG00000105675,ENSG00000163632,ENSG00000021852,ENSG00000113600,ENSG00000164047,ENSG00000170160,ENSG00000131142,ENSG00000170956,ENSG00000008300,ENSG00000106554,ENSG00000285199,ENSG00000136305,ENSG00000105205,ENSG00000170293,ENSG00000157184,ENSG00000276761…	XXbac-BPG154L12,4,AGPAT5,ZNF91,PLA2G6,KBTBD6,RBM11,NPIP,UBAP2L,RHOD,LGTN,AC002115,6,AC068288,1,PNN,SEC16A,RP11-111G23,1,WASF2,D2HGDH,EXOC7,FOXK1,ATG9B,CCDC144A,ZNF202,GPR84,GANAB,PMS2L2,LOXL2,C2orf29,C16orf70,POLE,NCAPD2,SNORD107,ASRGL1,DUSP7,DZIP1L,FNBP4,MAN1A1,SFRS16,CMTM8,MRPL37,SMCR8,ZNF85,UPK3B,DHX15,CCL25,KIAA0907,AC008073,1,CYLC2,PDCL,SNORA48,PRPF4,DNASE1,RAB3GAP2,SLC25A3,DNMBP,CHCHD3,NNT,…
Trumpi_LM.after.5FU_UP	LiverMets	PMID: 28692036	ENSG00000131016,ENSG00000184254,ENSG00000135046,ENSG00000179750,ENSG00000188042,ENSG00000184743,ENSG00000126581,ENSG00000023445,ENSG00000132357,ENSG00000105974,ENSG00000164463,ENSG00000095794,ENSG00000169429,ENSG00000143753,ENSG00000101457,ENSG00000111145,ENSG00000142227,ENSG00000116016,ENSG00000134954,ENSG00000071859,ENSG00000145780,ENSG00000180263,ENSG00000164949,ENSG00000121743,ENSG00000136235…	PHB2,PDXK,FAH,GMDS,SLCO1B3,PIR,HIBCH,DCPS,GALNT12,EBPL,HSD17B4,AKR1A1,SNRPD1,ABCB6,ATP2C2,NDUFAF3,SUCLG1,ECI2,SSR3,ST6GALNAC1,CYC1,GBAS,ASL,CLNS1A,NDUFS4,REG4,C8orf59,MVB12A,UGT1A6,ETHE1,ACAT1,AGR2,SLC18B1,AKR1B10,ADH5,RNPEP
Trumpi_LM.after.5FU_DN	LiverMets	PMID: 28692036	ENSG00000115657,ENSG00000075239,ENSG00000197894,ENSG00000106541,ENSG00000117448,ENSG00000198074,ENSG00000126522,ENSG00000064270,ENSG00000074201,ENSG00000179091,ENSG00000110063,ENSG00000123179,ENSG00000198721,ENSG00000105755,ENSG00000103876,ENSG00000119514,ENSG00000112699,ENSG00000198130,ENSG00000133835,ENSG00000141971,ENSG00000178057,ENSG00000164258,ENSG00000160209,ENSG00000215021,ENSG00000087842…	APOBEC3B,BECN1,HIST1H2BD,HIST1H2AC,KRT23,ATL3,DNTTIP1,IFRD1,HDAC9,HIST1H4H,UCA1,RUNX2,LINC00525,ANXA1,RANBP9,GULP1,SCGB2A1,HIST1H2BE,DEGS1,PHLDA1,HSPB8,TBC1D23,MAP3K2,SAMD9,GJA3,PEA15,GPNMB,SLC20A1,TJP1,ARL4C,GEM,C10orf10,AKAP12,BIRC3,CAV1,LYZ,MOSPD1,PDP1,ETS1,CREBRF,TNFRSF10D,SDR16C5,EPAS1,CYR61,PLK2,KLF10,CXCL8,FAM50A,EMP3,MMP7,SPINK1,MDK,MAX,FEM1C,SELENBP1,FGD6,ELK3,PMEPA1,CARD6,ZFAND2A,RAB30,…
Wu_LMS.immune.cells_SPP1+macrophage_DN	Immune marker	PMID: 34417225	ENSG00000170017,ENSG00000042753,ENSG00000109321,ENSG00000150347,ENSG00000124172,ENSG00000154518,ENSG00000117410,ENSG00000185883,ENSG00000198668,ENSG00000278567,ENSG00000274221,ENSG00000277632,ENSG00000277796,ENSG00000277768,ENSG00000277336,ENSG00000276085,ENSG00000277943,ENSG00000275824,ENSG00000275302,ENSG00000282604,ENSG00000275313,ENSG00000276125,ENSG00000276070,ENSG00000172757,ENSG00000138135…	SERF2,ATP5F1E,CHCHD2,HIST2H2AA4,JCHAIN,MYL6,IGLC3,CFL1,TNFAIP3,MRPS24,EEF1G,SH3BGRL3,UBL5,HLA-DRB1,ATP6V0B,RPL17,TNFSF13,REEP5,IGKC,ZFP36,TYROBP,TMEM35B,MT-ND5,HSP90B1,S100A4,TMA7,NDUFA4,NDUFAF8,GLDN,CYBA,SLIRP,ROMO1,HCST,GABARAP,SMIM4,CXCL2,PET100,ATP5MC3,SOD2,NDUFA13,AP2S1,OASL,ALCAM,PPIB,TOMM5,PMAIP1,CXCL3,CALM1,ARID5B,XIST,CH25H,SDC2,IL1RN,EIF4A1,SDF2L1,GLIPR2,ISG15,PSMA6,MIR155HG,MRC1,CCL3,T…
Wu_LMS.immune.cells_SPP1+macrophage_UP	Immune marker	PMID: 34417225	ENSG00000165029,ENSG00000160179,ENSG00000151651,ENSG00000162433,ENSG00000133805,ENSG00000182287,ENSG00000077420,ENSG00000113369,ENSG00000163512,ENSG00000151929,ENSG00000176788,ENSG00000060982,ENSG00000176171,ENSG00000104765,ENSG00000164713,ENSG00000133639,ENSG00000118816,ENSG00000110852,ENSG00000013441,ENSG00000203710,ENSG00000121966,ENSG00000067048,ENSG00000132002,ENSG00000143507,ENSG00000156508…	HSPA6,NUPR1,HSPA1A,HSPA1B,PLIN2,VCAN,HSPH1,NDRG1,HSP90AA1,HSPB1,DNAJB1,ZFAND2A,BNIP3L,ERO1A,SLC2A3,HLA-DRB5,FCGR3A,HLA-A,CXCR4,RPS4Y1,BTG1,HK2,SLC2A1,FAM162A,BASP1,CLEC2B,BNIP3,P4HA1,BAG3,MXI1,TPT1,RPL37A,SNX10,OLR1,LDHA,BRI3,TNFRSF1B,EGLN3,AP1S2,SORL1,BCAT1,RIOK3,CLK1,RPS20,RPS2,GLUL,RPS8,CCNI,VEGFA,RPL23,ABCA1,FYB1,MAP3K2,ABCG1,PGK1,RALA,TNFRSF14,TMEM51,UBE2B,APBB1IP,IFNGR1,SLC25A19,RPL27A,PPP1…
Wu_LMS.immune.cells_MRC1+CCL18+macrophage_UP	Immune marker	PMID: 34417225	ENSG00000160179,ENSG00000100997,ENSG00000115091,ENSG00000151651,ENSG00000134028,ENSG00000165092,ENSG00000111275,ENSG00000136250,ENSG00000182287,ENSG00000077420,ENSG00000130203,ENSG00000242247,ENSG00000102401,ENSG00000162704,ENSG00000105643,ENSG00000104763,ENSG00000169136,ENSG00000149311,ENSG00000069849,ENSG00000147416,ENSG00000119986,ENSG00000273686,ENSG00000166710,ENSG00000176788,ENSG00000060982…	HLA-DRB5,HSPA6,NUPR1,PDK4,ID3,MARCO,HLA-A,HLA-DQA2,CXCL9,FCGR3A,BASP1,IFI27,RPS4Y1,HSPB1,SERPINA1,CXCR4,CFD,DDIT4,LYZ,IL4I1,RHOB,VCAM1,TXNIP,VAMP5,RGS2,PLTP,ATP1B3,CXCL12,LIPA,HSPA1A,C2,STAT1,HSPA1B,ZNF331,RPL37A,CTSS,HLA-DQA1,SERPING1,TMEM176A,CTSC,VEGFA,PRNP,NAGK,VMP1,LY96,FCN1,LGALS2,GLUL,ALDH1A1,B2M,ALDH2,IER5L,FUCA1,SDC3,RPS2,OLR1,CREM,BTG1,TCEAL9,MARCKS,APOE,AP1S2,CTSH,SLC2A3,HLA-DPB1,ITM2B…
Wu_LMS.immune.cells_MRC1+CCL18+macrophage_DN	Immune marker	PMID: 34417225	ENSG00000143322,ENSG00000132965,ENSG00000123505,ENSG00000206560,ENSG00000135046,ENSG00000182718,ENSG00000164111,ENSG00000042753,ENSG00000150347,ENSG00000241553,ENSG00000162772,ENSG00000124172,ENSG00000154518,ENSG00000169020,ENSG00000167283,ENSG00000154723,ENSG00000117410,ENSG00000185883,ENSG00000248098,ENSG00000140379,ENSG00000134107,ENSG00000163170,ENSG00000168000,ENSG00000111678,ENSG00000258315…	CLEC5A,AC009107.2,RPL41,DBNDD2,EEF1G,CYTOR,AL118516.1,RPL27,PAM16,BCKDHA,SLAMF9,MIR222HG,ANKRD28,GAPDH,C17orf49,SLC16A10,ATP6V0B,AC016831.1,CD99,NDUFB2,ANXA2,ITGB7,CD276,GPR84,UBL5,BSCL2,COX6B1,ANXA5,MALAT1,COX8A,OST4,CKS2,ATP5F1E,RPS26,TMEM35B,DUSP5,MYL6,SNHG25,GADD45B,LINC00346,RPS21,ATP5MG,NDUFA3,ATP5ME,ARPC4,UQCR11,CSRNP1,PHLDA2,ATP5PF,PLAUR,CENPX,SEC61G,RPL36AL,BOLA3,IL3RA,AP2S1,MIR3945HG,TX…
Wu_LMS.immune.cells_CD8+T_UP	Immune marker	PMID: 34417225	ENSG00000085563,ENSG00000099204,ENSG00000102575,ENSG00000075624,ENSG00000072110,ENSG00000205336,ENSG00000043591,ENSG00000173744,ENSG00000135541,ENSG00000106546,ENSG00000100591,ENSG00000235588,ENSG00000206428,ENSG00000234836,ENSG00000235985,ENSG00000237727,ENSG00000204472,ENSG00000179841,ENSG00000101901,ENSG00000132965,ENSG00000123505,ENSG00000206560,ENSG00000186352,ENSG00000168876,ENSG00000135046…	CCR7,SELL,CD55,NDFIP1,KLF2,LEF1,S100B,RPL23,RPL7,RPL21,RPS3A,AIF1,RPL37A,SC5D,YBX3,RPL22,RPS6,RPS20,NOSIP,RPL31,RPS16,RPL37,RPS8,RPL13A,LDHB,RPS5,RPL38,RPL9,RPL34,RPS14,EEF1B2,KLF3,RPSA,RPS13,RPL32,EIF3E,TRABD2A,RPL10A,PDE3B,RPS2,RPS23,RPS11,RPS12,RGS10,NELL2,RPL4,PLAC8,TMEM123,TCF7,ACTN1,RPL35A,RPL5,RPS4X,RPL11,RPL13,RPL27A,RPL14,TPT1,RPLP2,RIPOR2,RPL23A,RPL19,RASGRP2,RPS25,SH3YL1,RPL12,RPL18,CC…
Wu_LMS.immune.cells_CD8+T_DN	Immune marker	PMID: 34417225	ENSG00000129968,ENSG00000011198,ENSG00000108798,ENSG00000075624,ENSG00000282844,ENSG00000130402,ENSG00000123146,ENSG00000124942,ENSG00000100591,ENSG00000170776,ENSG00000135334,ENSG00000106948,ENSG00000132965,ENSG00000123505,ENSG00000206560,ENSG00000186352,ENSG00000135046,ENSG00000182718,ENSG00000164111,ENSG00000136250,ENSG00000101474,ENSG00000239713,ENSG00000165272,ENSG00000047365,ENSG00000109321…	B2M,TMSB4X,HLA-B,H3F3B,IL32,GAPDH,GZMK,DUSP2,CST7,CD69,CCL5,GZMH,NKG7,GZMA,KLRB1,CCL4,CCL4L2,HSP90AA1,HCST,CLIC1,UBC,PFN1,HLA-DRB1,JUN,UBB,ACTB,KLRD1,HSPA1A,DUSP1,CLEC2B,S100A4,SH3BGRL3,IFNG,IER2,ZFP36,DNAJA1,KLF6,LCP1,HSPA1B,PTPRC,ALOX5AP,TRGC2,RGS1,SRSF7,CD99,CMC1,CYBA,CFL1,LINC01871,PRDM1,CCL3L1,CD63,CTSC,OAZ1,DNAJB1,CD74,HOPX,CYTOR,PPP1R15A,CXCR6,CKLF,ATP5F1E,HLA-C,PRF1,DUSP5,KLRG1,ID2,MYL6,G…
Wu_LMS.immune.cells_CD4+T_DN	Immune marker	PMID: 34417225	ENSG00000099204,ENSG00000075624,ENSG00000282844,ENSG00000130402,ENSG00000138071,ENSG00000115091,ENSG00000148700,ENSG00000123146,ENSG00000124942,ENSG00000106546,ENSG00000100591,ENSG00000170776,ENSG00000135334,ENSG00000101901,ENSG00000132965,ENSG00000123505,ENSG00000206560,ENSG00000186352,ENSG00000143401,ENSG00000135046,ENSG00000182718,ENSG00000164111,ENSG00000070718,ENSG00000077420,ENSG00000239713…	SERF2,HLA-C,ATP5F1E,CD58,MYL12A,UBL5,ARPC3,HLA-A,TMSB4X,JUND,MYL12B,ARPC2,CFL1,ANXA5,RHOC,SEC61B,PTPRC,BHLHE40,FAS,TPM3,TSC22D3,SYNE2,ERN1,YWHAH,CXCR4,CCDC107,ITGB1,ANXA2,PSMB9,SRSF7,B2M,CD63,DUSP5,TPI1,EFHD2,IQGAP1,ACTN4,MYL6,ANKRD28,CCR6,NEAT1,HLA-B,MIR4435-2HG,OAZ1,CYBA,TENT5C,AHNAK,RAB11FIP1,IER5,GADD45G,ACTB,CD74,CXCR6,RBPJ,S100A10,H3F3B,DYNLL1,UBE2S,RUNX3,CFLAR,ALOX5AP,LGALS3,CD2,CD99,HERPU…
Wu_LMS.immune.cells_CD4+T_UP	Immune marker	PMID: 34417225	ENSG00000085563,ENSG00000099204,ENSG00000146386,ENSG00000123130,ENSG00000102575,ENSG00000068366,ENSG00000075624,ENSG00000072110,ENSG00000282844,ENSG00000130402,ENSG00000135074,ENSG00000148700,ENSG00000123146,ENSG00000173744,ENSG00000135541,ENSG00000124942,ENSG00000106546,ENSG00000235588,ENSG00000206428,ENSG00000234836,ENSG00000235985,ENSG00000237727,ENSG00000204472,ENSG00000170776,ENSG00000135334…	KLF2,CD55,NDFIP1,SELL,RPL21,RPS20,RPS3A,CCR7,RPL7,RPL31,RPL23,RPS6,RPL37A,RPL13A,RPS14,NOSIP,RPL22,RPL37,RPL38,RPS5,RPL9,RPS16,RPS13,RPS26,EEF1B2,RPL34,RPS8,LEF1,PLAC8,TSHZ2,RPS12,NOP53,RPL27A,RPL35A,EIF3E,RPS23,RPL32,RPS2,RPS11,KLF3,AIF1,RPL10A,SC5D,RPSA,RPL23A,RPLP2,RPS25,RPS17,RPS27,RPL4,RPS29,RPL30,RPL13,RPL19,RPL5,RPL11,RPS10,RPL3,RPS27A,NACA,RPL14,RPS4X,RPL29,RPL18,RPL18A,RPS18,UBA52,RPS9,T…
Wu_LMS.immune.cells_Myeloid_UP	Immune marker	PMID: 34417225	ENSG00000175899,ENSG00000165029,ENSG00000114770,ENSG00000100997,ENSG00000011198,ENSG00000108798,ENSG00000143322,ENSG00000114626,ENSG00000288169,ENSG00000072818,ENSG00000144476,ENSG00000123130,ENSG00000134575,ENSG00000102575,ENSG00000151726,ENSG00000068366,ENSG00000075624,ENSG00000184009,ENSG00000136518,ENSG00000138071,ENSG00000139567,ENSG00000093072,ENSG00000042980,ENSG00000151651,ENSG00000134028…	CD1C,CLEC10A,HLA-DPB1,HLA-DQB1,AREG,GPR183,FCER1A,HLA-DPA1,HLA-DQA1,HLA-DRB1,PPA1,LGALS2,CD1E,HLA-DRA,GRASP,RPS23,HLA-DQA2,DUSP2,FCGR2B,ATF3,RPL36A,EEF1B2,RPS18,RPS4X,JAML,RPL5,RPS7,RPL26,PDGFB,HSPE1,RPS10,RPL10,RGS10,RGS1,RPS15A,MEF2C,RPS19,CXCR4,RPL3,RPL30,RPL11,RPS21,HLA-DMA,RPS27,HLA-DRB5,RPL7A,RPL32,RPS29,RPS3,NR4A3,RPS8,RPS5,RPL34,CD83,RPL18A,RPL37,RPL41,RPL19,RPS24,COMMD6,RPL17,RPS12,CKLF,…
Wu_LMS.immune.cells_Myeloid_DN	Immune marker	PMID: 34417225	ENSG00000175899,ENSG00000115977,ENSG00000165029,ENSG00000114770,ENSG00000160179,ENSG00000100997,ENSG00000011198,ENSG00000108798,ENSG00000143322,ENSG00000288169,ENSG00000072818,ENSG00000134575,ENSG00000102575,ENSG00000151726,ENSG00000123983,ENSG00000184009,ENSG00000072110,ENSG00000138071,ENSG00000093072,ENSG00000137845,ENSG00000151694,ENSG00000282230,ENSG00000168615,ENSG00000134028,ENSG00000184060…	C3AR1,ETV5,UPP1,SMS,ADAM9,SELPLG,TMEM123,B4GALT5,ETNK1,DOK3,ZDHHC20,MAN2B1,C5AR1,TMEM30A,CYFIP1,AP2A2,CD81,GAA,FKBP1A,IFIT1,METTL7A,LGALS8,P4HB,RCAN1,PRKCB,CD84,DYSF,ELL2,RAB27A,ATP6V1A,DHRS3,CD55,PHACTR2,PAG1,SCPEP1,RPN1,TCN2,CTSZ,AC015912.3,ADAR,ADAM10,S100A11,BNIP3L,TGOLN2,EHBP1L1,S100A6,SLC16A3,ACP2,MMD,IGHG3,NCF2,CXCL8,ME1,FTH1,PDXK,PECAM1,FYB1,DDX60L,CYP27A1,GAPDH,STAT2,TREM2,ZFYVE16,SAMSN1…
Wu_LMS.immune.cells_B_UP	Immune marker	PMID: 34417225	ENSG00000011198,ENSG00000146386,ENSG00000288169,ENSG00000072818,ENSG00000114331,ENSG00000102575,ENSG00000075624,ENSG00000184009,ENSG00000138071,ENSG00000115091,ENSG00000042980,ENSG00000148700,ENSG00000123146,ENSG00000156110,ENSG00000144218,ENSG00000284980,ENSG00000155189,ENSG00000100591,ENSG00000186063,ENSG00000163568,ENSG00000170776,ENSG00000174574,ENSG00000101901,ENSG00000120697,ENSG00000132965…	IGHG1,IGHG2,IGHG4,IGHG3,MZB1,HSP90B1,XBP1,SSR4,FKBP11,SEC11C,PPIB,PRDX4,DERL3,ITM2C,MYDGF,SSR3,FKBP2,SDF2L1,LMAN1,SPCS3,SEC61B,SELENOS,PRDM1,CYTOR,SPCS2,SPCS1,ERLEC1,MANF,NUCB2,TNFRSF17,PDIA6,KDELR2,CD38,HM13,RPN2,ANKRD28,OSTC,JSRP1,PDIA4,CRELD2,UBE2J1,KDELR1,GLRX,TRAM1,TRIB1,RRBP1,ERN1,P4HB,DNAJC1,SEL1L,TXNDC15,SRPRB,SLAMF7,ALG5,CLPTM1L,HDLBP,PDXK,SIL1,FNDC3B,CPEB4,MAN1A1,ZBP1,AC012236.1,SAR1B,C…
Wu_LMS.immune.cells_B_DN	Immune marker	PMID: 34417225	ENSG00000225989,ENSG00000236149,ENSG00000232169,ENSG00000231129,ENSG00000236342,ENSG00000206490,ENSG00000204574,ENSG00000136754,ENSG00000146386,ENSG00000288169,ENSG00000072818,ENSG00000114331,ENSG00000100813,ENSG00000102575,ENSG00000075624,ENSG00000184009,ENSG00000138071,ENSG00000115091,ENSG00000042980,ENSG00000087274,ENSG00000148700,ENSG00000123146,ENSG00000156110,ENSG00000101126,ENSG00000144218…	RPS15A,RPS15,RPL18,FAU,RPL29,RPL41,RPS14,RPS28,RPL35A,RPL36,RPS8,RPS9,RPL18A,RPS18,RPS19,RPS13,EEF1A1,PTMA,RPS3,RPL13,RPL26,RPLP2,RPL19,RPL28,RPS2,RPL12,RPS25,RPL34,RPL10A,RPL11,RPS6,RPS3A,RPS27A,RPL9,RPL21,RPL37,RPL38,RPL39,RPL32,RPS29,RPS21,RPS12,RPS23,RPL30,RPS27,MS4A1,LTB,CD74,CD52,CD83,CD37,BTG1,HLA-DPB1,HLA-DRB1,HLA-DRA,HLA-DPA1,RPL22,RPL14,RPL3,HLA-DQB1,RPS10,RPL35,RPL8,RPSA,RPL10,RPL15,HL…
Wu.LMS.immune.cells_NK_UP	Immune marker	PMID: 34417225	ENSG00000113088,ENSG00000143184,ENSG00000109321,ENSG00000277632,ENSG00000117281,ENSG00000143185,ENSG00000170345,ENSG00000221869,ENSG00000151327,ENSG00000158869,ENSG00000130844,ENSG00000100906,ENSG00000090104,ENSG00000140968,ENSG00000100385,ENSG00000164056,ENSG00000125740,ENSG00000119801,ENSG00000134545,ENSG00000006652,ENSG00000288640,ENSG00000145675,ENSG00000187118,ENSG00000184588,ENSG00000172215…	GZMK,XCL1,AREG,CCL3,CD160,XCL2,FOS,CEBPD,FAM177A1,FCER1G,ZNF331,NFKBIA,RGS1,IRF8,IL2RB,SPRY1,FOSB,YPEL5,KLRC1,IFRD1,PIK3R1,CMC1,PDE4B,CXCR6,CLDND1,KLRB1,GADD45B,CD69,ZFP36,GSTP1,TLE1,PABPC1,STK17A,PDCD4,TOX2,SRGN,CD7,COTL1,SPRY2,TMIGD2,DUSP1,ALOX5AP,JUND,H3F3B,PTMA,TPT1,TIPARP,PDE7A,NFKBIZ,HSPE1,CCNH,REL,RAB11FIP1,CYCS,HSP90AB1,PPP1R15A,CD38,HSPD1,DNAJA1,HDAC9,BCO2,KDM6B,TYROBP,NR4A1,TNFSF14,ICAM…
Wu.LMS.immune.cells_NK_DN	Immune marker	PMID: 34417225	ENSG00000034510,ENSG00000188846,ENSG00000271503,ENSG00000204525,ENSG00000166710,ENSG00000105374,ENSG00000077984,ENSG00000142634,ENSG00000078304,ENSG00000051523,ENSG00000111913,ENSG00000169554,ENSG00000150687,ENSG00000235162,ENSG00000153113,ENSG00000196924,ENSG00000131018,ENSG00000125868,ENSG00000168329,ENSG00000171476,ENSG00000135046,ENSG00000196126,ENSG00000145220,ENSG00000223865,ENSG00000124942…	TMSB10,RPL14,CCL5,HLA-C,B2M,NKG7,CST7,EFHD2,PPP2R5C,CYBA,RIPOR2,ZEB2,PRSS23,C12orf75,CAST,FLNA,SYNE1,DSTN,CX3CR1,HOPX,ANXA1,HLA-DRB1,LYAR,HLA-DPB1,AHNAK,SPON2,ADGRG1,PRF1,KLF2,SYNE2,LAIR2,SH3BGRL3,ARL4C,MYOM2,EMP3,LGALS1,S100A6,FCGR3A,CD52,S100A4,GZMH,GZMB,GNLY,FGFBP2,CD99,HLA-DPA1,CRIP1,IL32,SELPLG,AKR1C3,CEBPB,IGFBP7,FTL,MTSS1,S100A10,RPS14,RASA3,PTGDS,FGL2,ARPC2,PXN,CAPN2,CTSW,CD3D,VIM,MT2A,ST…
BroadInstitute_CancerImmunotherapy	Cancer		ENSG00000054267,ENSG00000150347,ENSG00000115966,ENSG00000156127,ENSG00000095794,ENSG00000168036,ENSG00000050165,ENSG00000107404,ENSG00000004975,ENSG00000161202,ENSG00000167658,ENSG00000120738,ENSG00000120690,ENSG00000163508,ENSG00000100393,ENSG00000106462,ENSG00000111206,ENSG00000150907,ENSG00000114861,ENSG00000157240,ENSG00000104290,ENSG00000164930,ENSG00000082701,ENSG00000100644,ENSG00000189403…	Tox2,Tpt1,Tcf7,Il12rb1,Ikzf3,Nr4a3,Litaf,Elf1,Irf2,Arid5b,Zeb2,Satb1,Dvl2,Nr4a1,Hif1a,Crem,Runx2,Ctnnb1,Tcf3,Foxo1,Dvl1,Gsk3b,Dkk3,Hmgb1,Dvl3,Sox4,Fzd1,Stat4,Nr4a2,Sp100,Rela,Ldhb,Eomes,Zfp292,Prdm1,Atf2,Il12rb2,Egr1,Id2,Lef1,Arid4b,Fzd6,Foxp1,Id3,Fzd3,Foxm1,Nr3c1,Irf9,Tox,Hmgb2,Oxnad1,Sp140,Sub1,Yy1,Lrp1,Ep300,P2rx7,Runx3,Rad21,Klf2,Ezh2,Myb,Eef2,Batf,Tbx21,Rps6
Yang_livermets.IM1	Liver Cancer	PMID: 36574521	ENSG00000173175,ENSG00000100336,ENSG00000047648,ENSG00000130433,ENSG00000004948,ENSG00000277796,ENSG00000277768,ENSG00000277336,ENSG00000276085,ENSG00000145996,ENSG00000133063,ENSG00000080644,ENSG00000105205,ENSG00000166527,ENSG00000166523,ENSG00000258227,ENSG00000205846,ENSG00000170289,ENSG00000096006,ENSG00000138755,ENSG00000173253,ENSG00000170074,ENSG00000150337,ENSG00000137440,ENSG00000153982…	MEGF10,TRPC6,MYRFL,CRISP3,CHRNA3,MUC6,WIF1,ADCY5,CDKAL1,IGHV3-13,TDRD12,CHIT1,PMEL,PRTG,RPH3A,IGSF10,ORAOV1,TBC1D30,IL1B,CNGB3,CLEC4D,MSMB,PGC,LPO,SEMA3D,PLAC4,VENTX,COLCA2,EMR2,SLC24A2,INHA,RSPO2,RP11-611E13.2,CLEC5A,SLAMF8,KIAA1239,MSLNL,CLC,FGFBP1,S100B,FAM153A,PTCHD3,KIT,WT1,CACNG6,GDPD1,HTRA4,ZNF683,ITGB2,MDGA1,CXCL9,CLEC6A,CLEC4E,DMRT2,KEL,IGLV2-23,MMP9,LILRB4,NCF1,RASSF6,MYEOV,CALCR,UNC5A,…
Yang_livermets.IM2	Liver Cancer	PMID: 36574521	ENSG00000121270,ENSG00000006071,ENSG00000164398,ENSG00000043591,ENSG00000162482,ENSG00000165092,ENSG00000108602,ENSG00000146205,ENSG00000109511,ENSG00000002726,ENSG00000171885,ENSG00000086159,ENSG00000159363,ENSG00000162779,ENSG00000198488,ENSG00000131668,ENSG00000100290,ENSG00000125378,ENSG00000174672,ENSG00000113303,ENSG00000235162,ENSG00000153446,ENSG00000082196,ENSG00000146540,ENSG00000188959…	PRSS1,CPA2,CEL,REP15,ERP27,CPNE9,C16orf89,PIWIL2,RP11-89K10.1,NAPSA,PDIA2,SNPH,CACNA2D2,IGHV3-20,CALB1,GRPR,ALPPL2,SPINK4,SPINK1,PIP,TMED6,MYLK2,RP11-431J24.2,ITLN1,PRSS3,NRG1,ADRB1,NOS3,MUC19,IGHV3-43,FAM46C,SCGB3A1,NPW,FABP2,GALNT8,GLYATL2,HSPA2,SFTPB,RGSL1,LRRC26,IGFBP2,GLUL,TNNI2,TEX11,LMOD1,ATP13A2,KCNK17,ANO7,PCDHA1,TACR2,LYPD2,S100A13,RP11-64D24.4,CCDC42B,ISL1,GRIN1,COL19A1,TPRXL,REG1A,IMP…
Yang_livermets.IM3	Liver Cancer	PMID: 36574521	ENSG00000163995,ENSG00000139985,ENSG00000151320,ENSG00000161905,ENSG00000052850,ENSG00000029534,ENSG00000131620,ENSG00000105290,ENSG00000005981,ENSG00000152092,ENSG00000181652,ENSG00000007516,ENSG00000133134,ENSG00000259571,ENSG00000206461,ENSG00000231624,ENSG00000224105,ENSG00000225543,ENSG00000229432,ENSG00000204542,ENSG00000198216,ENSG00000163618,ENSG00000183166,ENSG00000163888,ENSG00000077274…	PCSK1N,CTD-3064M3.3,CHGA,NKX3-2,GPR20,JPH4,GRM1,PTPRN,HEPHL1,CYP2F1,DRD5,GPR179,SMG8,RGS22,SCG5,DUSP26,RP11-47I22.3,ADAM21,S100A3,HRASLS,PDZRN4,FDCSP,ALOX15,SLC34A2,KIAA1045,CHI3L1,VWA5B2,KIRREL3,SV2C,CHGB,DIO3,CAPN6,C2orf91,FAM163A,STRIP2,CRB2,RP11-731J8.2,REEP1,MAB21L2,GPBAR1,FGFR1,ASB4,RP11-685M7.5,SYNM,CXCL6,OR51E1,CTC-457L16.2,ZNF385D,REEP2,SPTBN4,VAT1L,PRKG2,GBP6,FOXF1,GDPD2,KLK13,NACAD,PTH…
Yang_livermets.IM4	Liver Cancer	PMID: 36574521	ENSG00000118017,ENSG00000077522,ENSG00000140873,ENSG00000075340,ENSG00000196581,ENSG00000158578,ENSG00000145362,ENSG00000188611,ENSG00000139352,ENSG00000232237,ENSG00000108684,ENSG00000141431,ENSG00000105675,ENSG00000116039,ENSG00000132932,ENSG00000162630,ENSG00000176697,ENSG00000127325,ENSG00000169594,ENSG00000177025,ENSG00000288547,ENSG00000164972,ENSG00000133742,ENSG00000100314,ENSG00000154040…	DSC1,CALCA,GDPD4,CACNA1A,DPP6,GRP,CCDC129,SCN3A,COL20A1,RP11-437F6.1,CA1,RP11-650J17.1,SEZ6,CABP7,IFIT1B,HBA1,UNC13A,CCDC154,RBM4B,BAI1,SLC38A11,TRPA1,RP11-658F2.8,ENTPD8,FSIP1,TLL1,SCG2,CPA4,IMPG1,FIGF,SLITRK2,NSMF,RBM4,TMEM145,PTPRZ1,MEP1B,KRT10,SPTSSB,OGN,RGS7,ASXL3,GALNT9,ATP4A,ALAS2,KCNC1,SEZ6L,SCN2A,CTD-2050B12.2,ASAH2C,MLTK,PEX5L,RP11-36N20.1,HBA2,RP11-632F7.3,B3GALT2,ATP6V1B1,ASCL1,MYH4,U…
Yang_livermets.IM5	Liver Cancer	PMID: 36574521	ENSG00000275176,ENSG00000278540,ENSG00000155897,ENSG00000081051,ENSG00000154027,ENSG00000116748,ENSG00000260691,ENSG00000183831,ENSG00000240583,ENSG00000156219,ENSG00000167311,ENSG00000004848,ENSG00000167080,ENSG00000140379,ENSG00000138696,ENSG00000102010,ENSG00000213057,ENSG00000234511,ENSG00000167434,ENSG00000182389,ENSG00000162706,ENSG00000205212,ENSG00000291074,ENSG00000115009,ENSG00000184451…	GRIK1,RGS13,IGLV3-21,SLC12A3,MROH2B,LRMP,TRPM5,WSCD2,RTL1,IGHV4-39,BMX,HAP1,C14orf182,GCSAML,RP11-159F24.6,PI15,IGLV1-51,FCRLA,IGLV8-61,ANKRD45,RP11-53O19.1,GFI1B,FSTL5,DLGAP1-AS3,IFITM10,ART3,RP11-553A10.1,CNTN1,NPY1R,GPR97,RP11-730G20.1,AK5,POU2F3,LYST,IGLJ3,HAPLN1,IGHV4-61,AC011294.3,PADI4,C1orf220,ZSCAN5D,CADM3,PRSS21,SLC17A7,HORMAD1,ANKRD20A3,LECT1,IGLV7-43,KRT12,IGHV4-59,FAM178B,FBXW10,RP1-…
Carter_CIN25	Cancer	PMID: 16921376	ENSG00000157456,ENSG00000150753,ENSG00000135476,ENSG00000168496,ENSG00000111206,ENSG00000112984,ENSG00000164109,ENSG00000073111,ENSG00000166508,ENSG00000165304,ENSG00000132646,ENSG00000198901,ENSG00000111247,ENSG00000163918,ENSG00000104889,ENSG00000118707,ENSG00000131747,ENSG00000088325,ENSG00000071539,ENSG00000112742,ENSG00000175063	CCNB2,PRC1,CDC45L,KIF20A,UBE2C,CDC2,MAD2L1,H2AFZ,TRIP13,ESPL1,TTK,FEN1,MCM7,CNAP1,MELK,TPX2,FOXM1,TOP2A,MCM2,RAD51AP1,RFC4,PCNA,RNASEH2A,TGIF2,C20orf24,CCT5
Carter_CIN70	Cancer	PMID: 16921376	ENSG00000136518,ENSG00000288210,ENSG00000105011,ENSG00000156802,ENSG00000178999,ENSG00000134057,ENSG00000157456,ENSG00000150753,ENSG00000117399,ENSG00000094804,ENSG00000111665,ENSG00000134690,ENSG00000138180,ENSG00000123975,ENSG00000111726,ENSG00000172893,ENSG00000130826,ENSG00000114346,ENSG00000066044,ENSG00000135476,ENSG00000106462,ENSG00000168496,ENSG00000111206,ENSG00000282019,ENSG00000105220…	TPX2,PRC1,FOXM1,CDC2,C20orf24,TGIF2,MCM2,H2AFZ,TOP2A,PCNA,UBE2C,MELK,TRIP13,CNAP1,MCM7,RNASEH2A,RAD51AP1,KIF20A,CDC45L,MAD2L1,ESPL1,CCNB2,FEN1,TTK,CCT5,RFC4,ATAD2,ch-TOG,NUP205,CDC20,CKS2,RRM2,ELAVL1,CCNB1,RRM1,AURKB,MSH6,EZH2,CTPS,DKC1,OIP5,CDCA8,PTTG1,CEP55,H2AFX,CMAS,BRRN1,MCM10,LSM4,MTB,ASF1B,ZWINT,TOPK,FLJ10036,CDCA3,ECT2,CDC6,UNG,MTCH2,RAD21,ACTL6A,GPI,MGC13096,SFRS2,HDGF,NXT1,NEK2,DHCR7,ST…
