# Supplementary material for: Transcriptomic Maps of Colorectal Liver Metastasis: Machine Learning of Gene Activation Patterns and Epigenetic Trajectories in Support of Precision Medicine
Source: Cancers (Basel). 2023 Jul 28;15(15):3835. doi: 10.3390/cancers15153835 (PMC10417131; doi:10.3390/cancers15153835)
Supplement: Supplementary file 1 [file cancers-15-03835-s001.zip › Suppl-Table-S4. max+min HR genes.xlsx]

## Sheet: max. and min.HR.genes
Genes in max HR metagene						Genes in min HR metagene
name	ensemble	id	coordinate			name	ensemble	id	coordinate
SPRR1A	ENSG00000169474	TC01001246.hg	5 x 1			AGO4	ENSG00000134698	TC01000462.hg	28 x 45
SPRR3	ENSG00000163209	TC01001247.hg	5 x 1			MIGA1	ENSG00000180488	TC01000788.hg	28 x 45
SPRR1B	ENSG00000169469	TC01001248.hg	5 x 1			MTR	ENSG00000116984	TC01001956.hg	28 x 45
		TC01001560.hg	5 x 1				ENSG00000230092	TC01002073.hg	28 x 45
F3	ENSG00000117525	TC01002886.hg	5 x 1			EVI5	ENSG00000067208	TC01002868.hg	28 x 45
		TC01005380.hg	5 x 1			AGO4	ENSG00000134698	TC01004314.hg	28 x 45
INPP1	ENSG00000151689	TC02001118.hg	5 x 1			ELK4	ENSG00000158711	TC01006060.hg	28 x 45
	ENSG00000238133	TC02004694.hg	5 x 1			ZMYM6	ENSG00000163867	TC01006349.hg	28 x 45
CREG2	ENSG00000175874	TC02005041.hg	5 x 1			FMNL2	ENSG00000157827	TC02000941.hg	28 x 45
KBTBD12	ENSG00000187715	TC03000668.hg	5 x 1					TC02000968.hg	28 x 45
	ENSG00000250271	TC03000829.hg	5 x 1			PPP1R21	ENSG00000162869	TC02003226.hg	28 x 45
APOD	ENSG00000189058	TC03002146.hg	5 x 1			ZNF512	ENSG00000259080	TC02004934.hg	28 x 45
MELTF	ENSG00000163975	TC03002173.hg	5 x 1			CRBN	ENSG00000113851	TC03001123.hg	28 x 45
DCBLD2	ENSG00000057019	TC03003002.hg	5 x 1			ANKRD28	ENSG00000206560	TC03001213.hg	28 x 45
WFS1	ENSG00000109501	TC04000068.hg	5 x 1			CLASP2	ENSG00000163539	TC03001277.hg	28 x 45
TMEM154	ENSG00000170006	TC04001650.hg	5 x 1			XRN1	ENSG00000114127	TC03001851.hg	28 x 45
NMUR2	ENSG00000132911	TC05001963.hg	5 x 1			CCDC66	ENSG00000180376	TC03002352.hg	28 x 45
ADAM19	ENSG00000135074	TC05001986.hg	5 x 1			RASA2	ENSG00000155903	TC03002567.hg	28 x 45
CLTB	ENSG00000175416	TC05002093.hg	5 x 1			LRCH3	ENSG00000186001	TC03002770.hg	28 x 45
RNF39	ENSG00000204618	TC06001493.hg	5 x 1			PHC3	ENSG00000173889	TC03003204.hg	28 x 45
C6orf15	ENSG00000225543	TC06001517.hg	5 x 1			NCK1	ENSG00000158092	TC03003323.hg	28 x 45
LY6G6C	ENSG00000235925	TC06001538.hg	5 x 1			TBC1D19	ENSG00000109680	TC04000182.hg	28 x 45
RAET1L	ENSG00000155918	TC06002222.hg	5 x 1			WWC2	ENSG00000151718	TC04000887.hg	28 x 45
FOXC1	ENSG00000054598	TC06002403.hg	5 x 1			BOD1L1	ENSG00000038219	TC04001047.hg	28 x 45
UNC5CL	ENSG00000124602	TC06004133.hg	5 x 1			CHIC2	ENSG00000109220	TC04001201.hg	28 x 45
SCIN	ENSG00000006747	TC07000095.hg	5 x 1			HELQ	ENSG00000163312	TC04001348.hg	28 x 45
	ENSG00000279655	TC07000173.hg	5 x 1			WDFY3	ENSG00000163625	TC04001355.hg	28 x 45
	ENSG00000230316	TC07002545.hg	5 x 1			PRMT9	ENSG00000164169	TC04001625.hg	28 x 45
	ENSG00000236039	TC07002809.hg	5 x 1			NEK1	ENSG00000137601	TC04001725.hg	28 x 45
PRAG1	ENSG00000275342	TC08000938.hg	5 x 1			TENT2	ENSG00000164329	TC05000391.hg	28 x 45
DUSP4	ENSG00000120875	TC08001099.hg	5 x 1			DMXL1	ENSG00000172869	TC05000563.hg	28 x 45
PLEC	ENSG00000178209	TC08001737.hg	5 x 1			TRIM23	ENSG00000113595	TC05001409.hg	28 x 45
STXBP1	ENSG00000136854	TC09000668.hg	5 x 1			DCP2	ENSG00000172795	TC05002568.hg	28 x 45
SYTL5	ENSG00000147041	TC0X000175.hg	5 x 1			KPNA5	ENSG00000196911	TC06000925.hg	28 x 45
DUSP5	ENSG00000138166	TC10000801.hg	5 x 1			KIF13A	ENSG00000137177	TC06001298.hg	28 x 45
MYRF	ENSG00000124920	TC11000539.hg	5 x 1			DST	ENSG00000151914	TC06001828.hg	28 x 45
RHOD	ENSG00000173156	TC11000679.hg	5 x 1			SLC18B1	ENSG00000146409	TC06002122.hg	28 x 45
HEPHL1	ENSG00000181333	TC11000915.hg	5 x 1			BBS9	ENSG00000122507	TC07000215.hg	28 x 45
GRAMD1B	ENSG00000023171	TC11001124.hg	5 x 1			BBS9	ENSG00000122507	TC07000216.hg	28 x 45
MMP10	ENSG00000166670	TC11002233.hg	5 x 1			AOAH	ENSG00000136250	TC07001285.hg	28 x 45
PCSK7	ENSG00000254851	TC11002892.hg	5 x 1			CADPS2	ENSG00000081803	TC07001813.hg	28 x 45
MMP1	ENSG00000196611	TC11003311.hg	5 x 1			PCM1	ENSG00000078674	TC08000135.hg	28 x 45
	ENSG00000235884	TC12000283.hg	5 x 1			ZDHHC2	ENSG00000104219	TC08001815.hg	28 x 45
DGKA	ENSG00000065357	TC12000495.hg	5 x 1			CNTRL	ENSG00000119397	TC09000607.hg	28 x 45
	ENSG00000285517	TC12002303.hg	5 x 1			SETX	ENSG00000107290	TC09001673.hg	28 x 45
IL23A	ENSG00000110944	TC12002390.hg	5 x 1			ATRX	ENSG00000085224	TC0X002137.hg	28 x 45
LINC00460	ENSG00000233532	TC13000378.hg	5 x 1				ENSG00000235981	TC0Y000276.hg	28 x 45
LINC00460	ENSG00000233532	TC13001274.hg	5 x 1			SLF2	ENSG00000119906	TC10000726.hg	28 x 45
SAV1	ENSG00000151748	TC14001122.hg	5 x 1			WDR11	ENSG00000120008	TC10000876.hg	28 x 45
LINC02331	ENSG00000235269	TC14001147.hg	5 x 1			ZRANB1	ENSG00000019995	TC10000909.hg	28 x 45
	ENSG00000258404	TC14001522.hg	5 x 1			ANK3	ENSG00000151150	TC10001319.hg	28 x 45
CALB2	ENSG00000172137	TC16000589.hg	5 x 1			RHOBTB1	ENSG00000072422	TC10001320.hg	28 x 45
	ENSG00000246898	TC16001600.hg	5 x 1			PPP3CB	ENSG00000107758	TC10001410.hg	28 x 45
CALB2	ENSG00000172137	TC16001621.hg	5 x 1			CCDC82	ENSG00000149231	TC11002212.hg	28 x 45
	ENSG00000214856	TC17000216.hg	5 x 1			RESF1	ENSG00000174718	TC12000295.hg	28 x 45
	ENSG00000214856	TC17002091.hg	5 x 1			USP15	ENSG00000135655	TC12000555.hg	28 x 45
TNS4	ENSG00000279806	TC17002619.hg	5 x 1			PARP11	ENSG00000111224	TC12001116.hg	28 x 45
CHRNB1	ENSG00000170175	TC17002862.hg	5 x 1			ARID4A	ENSG00000032219	TC14000348.hg	28 x 45
SLC14A1	ENSG00000141469	TC18000164.hg	5 x 1			PCNX1	ENSG00000100731	TC14000429.hg	28 x 45
KCTD1	ENSG00000134504	TC18000426.hg	5 x 1			STRN3	ENSG00000196792	TC14001007.hg	28 x 45
IGFL4	ENSG00000204869	TC19001641.hg	5 x 1			DICER1	ENSG00000100697	TC14001472.hg	28 x 45
FXYD5	ENSG00000089327	TC19002097.hg	5 x 1			PCNX1	ENSG00000100731	TC14001755.hg	28 x 45
SLC4A11	ENSG00000088836	TC20000571.hg	5 x 1			DICER1	ENSG00000100697	TC14002137.hg	28 x 45
SEMG1	ENSG00000124233	TC20001764.hg	5 x 1			ATG2B	ENSG00000066739	TC14002145.hg	28 x 45
TFF2	ENSG00000160181	TC21000485.hg	5 x 1			MTMR10	ENSG00000166912	TC15001161.hg	28 x 45
	ENSG00000182351	TC22000156.hg	5 x 1			ZNF280D	ENSG00000285253	TC15001478.hg	28 x 45
C6orf15	ENSG00000225543	TC6_cox_hap2000149.hg	5 x 1			BNIP2	ENSG00000140299	TC15001503.hg	28 x 45
LY6G6C	ENSG00000235925	TC6_cox_hap2000167.hg	5 x 1			DENND4A	ENSG00000174485	TC15001571.hg	28 x 45
C6orf15	ENSG00000225543	TC6_dbb_hap3000138.hg	5 x 1			MYO9A	ENSG00000066933	TC15001620.hg	28 x 45
LY6G6C	ENSG00000235925	TC6_dbb_hap3000156.hg	5 x 1			CHD9	ENSG00000177200	TC16000445.hg	28 x 45
C6orf15	ENSG00000225543	TC6_mann_hap4000126.hg	5 x 1			AKAP10	ENSG00000108599	TC17001252.hg	28 x 45
LY6G6C	ENSG00000235925	TC6_mann_hap4000144.hg	5 x 1			SLFN13	ENSG00000154760	TC17001371.hg	28 x 45
C6orf15	ENSG00000225543	TC6_mcf_hap5000126.hg	5 x 1			SYNRG	ENSG00000275066	TC17001408.hg	28 x 45
LY6G6C	ENSG00000235925	TC6_mcf_hap5000144.hg	5 x 1				ENSG00000240356	TC17002421.hg	28 x 45
C6orf15	ENSG00000225543	TC6_qbl_hap6000139.hg	5 x 1			CEP112	ENSG00000154240	TC17002856.hg	28 x 45
LY6G6C	ENSG00000235925	TC6_ssto_hap7000139.hg	5 x 1			ELP2	ENSG00000134759	TC18000148.hg	28 x 45
						PIK3C3	ENSG00000078142	TC18000156.hg	28 x 45
						POLI	ENSG00000101751	TC18000186.hg	28 x 45
						ELP2	ENSG00000134759	TC18000681.hg	28 x 45
						ZFP82	ENSG00000181007	TC19001468.hg	28 x 45

## Sheet: HR-score-ranked samples
sample	HR score
GSM4823171	-1.17568
GSM4822912	-0.92152
GSM4822929	-0.847909
GSM4823166	-0.764454
GSM4823064	-0.745769
GSM4823096	-0.713462
GSM4823088	-0.704499
GSM4823092	-0.679855
GSM4823021	-0.677043
GSM4822971	-0.657256
GSM4823046	-0.63577
GSM4822954	-0.619139
GSM4823170	-0.616409
GSM4822925	-0.603656
GSM4823165	-0.583459
GSM4823090	-0.578092
GSM4823062	-0.565934
GSM4823063	-0.560393
GSM4823080	-0.548824
GSM4823061	-0.548088
GSM4823011	-0.540986
GSM4823102	-0.522512
GSM4822977	-0.506686
GSM4822915	-0.50369
GSM4823095	-0.490957
GSM4823087	-0.485507
GSM4822970	-0.472253
GSM4823065	-0.443269
GSM4823048	-0.434192
GSM4822980	-0.430782
GSM4822910	-0.41411
GSM4823081	-0.408927
GSM4823053	-0.404488
GSM4823099	-0.400977
GSM4822990	-0.39486
GSM4823163	-0.389037
GSM4823040	-0.378461
GSM4822923	-0.377659
GSM4823161	-0.375692
GSM4823155	-0.372146
GSM4823025	-0.368147
GSM4822917	-0.360651
GSM4822934	-0.360429
GSM4823077	-0.357358
GSM4823144	-0.352838
GSM4823160	-0.351293
GSM4822903	-0.341362
GSM4823152	-0.339067
GSM4822948	-0.330294
GSM4823159	-0.329832
GSM4822988	-0.329421
GSM4823154	-0.327585
GSM4822981	-0.319584
GSM4822963	-0.315325
GSM4822995	-0.315223
GSM4823151	-0.308754
GSM4822989	-0.306272
GSM4823153	-0.306101
GSM4823164	-0.297465
GSM4823059	-0.295792
GSM4823054	-0.28841
GSM4823085	-0.285747
GSM4823024	-0.28547
GSM4823067	-0.282185
GSM4823119	-0.278997
GSM4823072	-0.274318
GSM4823078	-0.27107
GSM4822961	-0.269085
GSM4823027	-0.268499
GSM4822927	-0.267041
GSM4823006	-0.260897
GSM4823145	-0.259819
GSM4823015	-0.255372
GSM4823071	-0.254302
GSM4822969	-0.251926
GSM4823075	-0.251527
GSM4823142	-0.245082
GSM4823083	-0.243512
GSM4823158	-0.243003
GSM4823086	-0.238703
GSM4823073	-0.234635
GSM4823134	-0.234559
GSM4823045	-0.233819
GSM4823004	-0.232426
GSM4823023	-0.228417
GSM4822987	-0.227085
GSM4823118	-0.224804
GSM4822936	-0.224043
GSM4823167	-0.222309
GSM4822978	-0.219529
GSM4822928	-0.217643
GSM4822926	-0.216027
GSM4823094	-0.199364
GSM4823066	-0.19754
GSM4822916	-0.195936
GSM4823074	-0.192952
GSM4823068	-0.189072
GSM4823018	-0.184953
GSM4823052	-0.184353
GSM4823120	-0.178769
GSM4822982	-0.165656
GSM4822904	-0.165405
GSM4822930	-0.165254
GSM4823135	-0.165093
GSM4823140	-0.160075
GSM4823132	-0.153016
GSM4823133	-0.149899
GSM4822968	-0.146044
GSM4823005	-0.14597
GSM4823058	-0.144851
GSM4823069	-0.138964
GSM4822914	-0.11802
GSM4823012	-0.11598
GSM4823150	-0.115767
GSM4822976	-0.114726
GSM4822985	-0.114006
GSM4823050	-0.105053
GSM4823126	-0.10443
GSM4823131	-0.103515
GSM4823104	-0.0987696
GSM4823127	-0.0961746
GSM4822945	-0.0935517
GSM4823049	-0.0884726
GSM4823042	-0.081782
GSM4822918	-0.0726
GSM4823007	-0.0686098
GSM4822962	-0.0682373
GSM4822953	-0.0612509
GSM4823003	-0.0611727
GSM4823129	-0.054145
GSM4823157	-0.0527206
GSM4822979	-0.0475718
GSM4823070	-0.0463496
GSM4822937	-0.041201
GSM4823147	-0.0352088
GSM4823000	-0.0318316
GSM4822946	-0.0213047
GSM4823056	-0.0133639
GSM4823084	-0.012964
GSM4823013	-0.0122426
GSM4822960	-0.00841018
GSM4823176	-0.00764559
GSM4822913	-0.000187402
GSM4823117	0.00345167
GSM4822931	0.00454383
GSM4822996	0.00472614
GSM4822933	0.0072289
GSM4823022	0.00838682
GSM4823162	0.0110379
GSM4823098	0.0112941
GSM4822991	0.0142579
GSM4822966	0.0223195
GSM4823029	0.0226234
GSM4823017	0.0269151
GSM4822986	0.029929
GSM4823014	0.0338821
GSM4823138	0.0382286
GSM4823146	0.0408072
GSM4823010	0.0468425
GSM4823141	0.048377
GSM4823175	0.0485773
GSM4822994	0.0492201
GSM4823106	0.058262
GSM4823168	0.0609722
GSM4823028	0.0616689
GSM4823076	0.0632943
GSM4822999	0.0640292
GSM4823143	0.0644943
GSM4823173	0.0645095
GSM4822998	0.0656186
GSM4822935	0.0686372
GSM4823122	0.0690658
GSM4822907	0.0832112
GSM4822964	0.0840267
GSM4823149	0.0883114
GSM4823016	0.0970456
GSM4823020	0.10375
GSM4822997	0.115346
GSM4823051	0.116178
GSM4823034	0.116473
GSM4823039	0.130737
GSM4822950	0.13391
GSM4822944	0.139096
GSM4823115	0.145623
GSM4823079	0.147367
GSM4822984	0.147539
GSM4822992	0.148059
GSM4823114	0.150743
GSM4823019	0.155898
GSM4822949	0.157687
GSM4822906	0.159215
GSM4822993	0.159232
GSM4823148	0.160308
GSM4823055	0.162507
GSM4822921	0.163003
GSM4822965	0.164581
GSM4823112	0.17038
GSM4823156	0.18131
GSM4823136	0.187858
GSM4823009	0.19085
GSM4822939	0.196395
GSM4823082	0.197518
GSM4823107	0.202945
GSM4823033	0.205667
GSM4822924	0.208447
GSM4822951	0.210247
GSM4823116	0.215956
GSM4822942	0.222053
GSM4823041	0.222337
GSM4823026	0.223912
GSM4822911	0.224709
GSM4823002	0.225177
GSM4823174	0.227042
GSM4822974	0.228434
GSM4823001	0.229969
GSM4823047	0.235611
GSM4822932	0.239668
GSM4822909	0.244364
GSM4822959	0.249278
GSM4823123	0.250066
GSM4822975	0.255151
GSM4822955	0.263706
GSM4822956	0.276531
GSM4822958	0.277464
GSM4822972	0.288666
GSM4823057	0.292955
GSM4823008	0.297343
GSM4823097	0.302291
GSM4822941	0.310899
GSM4823093	0.311108
GSM4823139	0.324677
GSM4823124	0.330824
GSM4822905	0.332038
GSM4823169	0.340484
GSM4822938	0.346887
GSM4823089	0.34739
GSM4823109	0.349494
GSM4822983	0.350997
GSM4822920	0.356089
GSM4823121	0.357514
GSM4823111	0.359232
GSM4823100	0.36217
GSM4823125	0.364978
GSM4823103	0.371418
GSM4823130	0.387645
GSM4823030	0.400356
GSM4823137	0.413969
GSM4822957	0.417134
GSM4822908	0.439251
GSM4822943	0.442534
GSM4823108	0.448966
GSM4823172	0.451012
GSM4823060	0.472854
GSM4822919	0.472936
GSM4823032	0.482485
GSM4823037	0.514748
GSM4822952	0.52266
GSM4823101	0.531192
GSM4823110	0.531908
GSM4823113	0.570963
GSM4823035	0.571745
GSM4823031	0.582087
GSM4823038	0.584652
GSM4822973	0.59516
GSM4823128	0.625903
GSM4822947	0.629532
GSM4822922	0.630192
GSM4823105	0.633385
GSM4822940	0.634849
GSM4822967	0.658725
GSM4823036	0.673333
GSM4823091	0.734058
GSM4823181	0.738441
GSM4823182	0.746172
GSM4823180	0.757901
GSM4823043	0.820896
GSM4823177	0.826139
GSM4823178	0.839573
GSM4823044	0.941689
GSM4823179	1.01933
GSM4823183	1.05218
GSM4823184	1.09989
GSM4823185	1.18789
